# Supplementary material for: Remarkable biosynthetic capacity of Arctic hydrothermal biofilms
Source: Research Square preprint supplement (doi:10.21203/rs.3.rs-7619139/v1), 2025-09-29
Supplement: Supplementary file 1 [file 12ca756662aa427201a2dc2d.xlsx]

## Sheet: Supplementary Table 3
Supplementary Table 4: BGCs predicted from 9 AMOR biofilms (n=2965).
Metagenome	MAG	BGC	BGC class	Predicted product	Length (kb)	Number of genes
M24	Aegir_M24_B10	BPIAAOIK_41.region001	Hybrid	arylpolyene:resorcinol	35.59	32
M24	Aegir_M24_B10	BPIAAOIK_63.region001	Other	arylpolyene	13.81	13
M24	Aegir_M24_B100	MLOKDKNP_105.region001	NRP	NRPS-like	19.28	18
M24	Aegir_M24_B100	MLOKDKNP_145.region001	Hybrid	NRPS-like:T1PKS	12.43	6
M24	Aegir_M24_B101	OAGAJOKM_53.region001	RiPP	RRE-containing	20.24	17
M24	Aegir_M24_B102	CLDLOCKN_1.region001	RiPP	RiPP-like	11.74	7
M24	Aegir_M24_B102	CLDLOCKN_59.region001	Other	betalactone	17.72	14
M24	Aegir_M24_B102	CLDLOCKN_18.region001	RiPP	RiPP-like	10.85	11
M24	Aegir_M24_B103	PADGKGNB_104.region001	Other	arylpolyene	2.5	2
M24	Aegir_M24_B103	PADGKGNB_118.region001	Other	arylpolyene	6.03	4
M24	Aegir_M24_B103	PADGKGNB_119.region001	Polyketide	hglE-KS	28.02	13
M24	Aegir_M24_B103	PADGKGNB_202.region001	Hybrid	hglE-KS:T1PKS	10.76	4
M24	Aegir_M24_B103	PADGKGNB_212.region001	Other	arylpolyene	5.87	6
M24	Aegir_M24_B103	PADGKGNB_47.region001	Polyketide	T3PKS	22.89	20
M24	Aegir_M24_B103	PADGKGNB_66.region001	RiPP	RiPP-like	6.47	7
M24	Aegir_M24_B103	PADGKGNB_95.region001	Other	arylpolyene	24.53	16
M24	Aegir_M24_B105	ADKELONG_17.region001	RiPP	RiPP-like	10.86	12
M24	Aegir_M24_B105	ADKELONG_27.region001	Terpene	Terpene generic	21.71	23
M24	Aegir_M24_B105	ADKELONG_33.region001	RiPP	RRE-containing	12.23	10
M24	Aegir_M24_B106	PABPKNGJ_58.region001	RiPP	thiopeptide	19.26	17
M24	Aegir_M24_B106	PABPKNGJ_46.region001	RiPP	RRE-containing	14.23	14
M24	Aegir_M24_B107	IGCMBEGF_69.region001	RiPP	RiPP-like	2.86	2
M24	Aegir_M24_B107	IGCMBEGF_79.region001	RiPP	RRE-containing	12.57	17
M24	Aegir_M24_B108	JDJMJEBK_133.region001	NRP	NRP generic	44.12	34
M24	Aegir_M24_B108	JDJMJEBK_135.region001	NRP	NRP generic	24.75	17
M24	Aegir_M24_B108	JDJMJEBK_66.region001	NRP	NRP generic	6.46	3
M24	Aegir_M24_B109	EHJJEODD_130.region001	Other	hserlactone	20.62	19
M24	Aegir_M24_B109	EHJJEODD_143.region001	Other	hserlactone	18.76	19
M24	Aegir_M24_B109	EHJJEODD_77.region001	Hybrid	betalactone:hserlactone	23.04	25
M24	Aegir_M24_B11	CKJGPINA_108.region001	NRP	NRPS-like	2.97	4
M24	Aegir_M24_B11	CKJGPINA_158.region001	Other	betalactone	14.52	14
M24	Aegir_M24_B11	CKJGPINA_16.region001	Terpene	Terpene generic	11	6
M24	Aegir_M24_B11	CKJGPINA_176.region001	RiPP	RiPP-like	9.22	11
M24	Aegir_M24_B11	CKJGPINA_207.region001	RiPP	redox-cofactor	4.43	5
M24	Aegir_M24_B11	CKJGPINA_237.region001	Other	phosphonate	15.6	15
M24	Aegir_M24_B11	CKJGPINA_268.region001	Other	resorcinol	16.38	18
M24	Aegir_M24_B11	CKJGPINA_280.region001	RiPP	RiPP-like	3.06	4
M24	Aegir_M24_B110	NLMDFIEA_168.region001	Terpene	Terpene generic	20.98	21
M24	Aegir_M24_B110	NLMDFIEA_175.region001	RiPP	RiPP-like	9.18	12
M24	Aegir_M24_B110	NLMDFIEA_181.region001	RiPP	RiPP-like	10.74	6
M24	Aegir_M24_B110	NLMDFIEA_392.region001	RiPP	RiPP-like	10.83	11
M24	Aegir_M24_B110	NLMDFIEA_9.region001	NRP	NRPS-like	30.43	23
M24	Aegir_M24_B111	PIANMFAJ_110.region001	RiPP	RiPP-like	10.56	13
M24	Aegir_M24_B111	PIANMFAJ_48.region001	RiPP	RiPP-like	11.76	12
M24	Aegir_M24_B112	NCOLKFPD_107.region001	RiPP	RiPP-like	9.27	11
M24	Aegir_M24_B112	NCOLKFPD_346.region001	RiPP	RRE-containing	15.25	12
M24	Aegir_M24_B112	NCOLKFPD_378.region001	Terpene	Terpene generic	3.67	3
M24	Aegir_M24_B112	NCOLKFPD_502.region001	Terpene	Terpene generic	7.3	5
M24	Aegir_M24_B112	NCOLKFPD_716.region001	RiPP	RiPP-like	7.91	6
M24	Aegir_M24_B113	NEOEDNCB_47.region001	Hybrid	arylpolyene:resorcinol	22.28	24
M24	Aegir_M24_B113	NEOEDNCB_12.region001	Other	arylpolyene	18.94	18
M24	Aegir_M24_B114	GDCPMDGF_12.region001	Terpene	Terpene generic	18.41	15
M24	Aegir_M24_B114	GDCPMDGF_34.region001	Polyketide	T3PKS	21.69	21
M24	Aegir_M24_B115	FBCILAEC_199.region001	Other	hserlactone	8.06	11
M24	Aegir_M24_B115	FBCILAEC_254.region001	RiPP	RiPP-like	6.01	8
M24	Aegir_M24_B116	LFICFLKJ_140.region001	RiPP	RiPP-like	11.62	12
M24	Aegir_M24_B116	LFICFLKJ_159.region001	RiPP	RiPP-like	7.96	8
M24	Aegir_M24_B117	CAMPJJDL_203.region001	Other	hserlactone	8.6	9
M24	Aegir_M24_B118	FAKNGFII_126.region001	RiPP	RRE-containing	8.36	9
M24	Aegir_M24_B118	FAKNGFII_144.region001	Other	resorcinol	10.34	10
M24	Aegir_M24_B118	FAKNGFII_18.region001	Other	arylpolyene	3.19	3
M24	Aegir_M24_B118	FAKNGFII_201.region001	Other	arylpolyene	2.98	4
M24	Aegir_M24_B118	FAKNGFII_274.region001	Terpene	Terpene generic	6.47	6
M24	Aegir_M24_B118	FAKNGFII_392.region001	Terpene	Terpene generic	4.59	5
M24	Aegir_M24_B118	FAKNGFII_40.region001	Polyketide	PKS-like	19.5	23
M24	Aegir_M24_B119	DEJCOLOP_193.region001	Polyketide	T3PKS	9.36	11
M24	Aegir_M24_B12	AMEDOMHJ_171.region001	NRP	NRPS-like	12.18	15
M24	Aegir_M24_B12	AMEDOMHJ_253.region001	RiPP	RiPP-like	4.62	4
M24	Aegir_M24_B12	AMEDOMHJ_272.region001	NRP	NRP generic	4.54	1
M24	Aegir_M24_B12	AMEDOMHJ_30.region001	Hybrid	NRPS-like:T1PKS	11.75	3
M24	Aegir_M24_B12	AMEDOMHJ_19.region001	RiPP	RiPP-like	7.99	10
M24	Aegir_M24_B122	FDEIFABP_83.region001	RiPP	redox-cofactor	11.91	13
M24	Aegir_M24_B122	FDEIFABP_79.region001	RiPP	RiPP-like	10.49	11
M24	Aegir_M24_B122	FDEIFABP_48.region001	Terpene	Terpene generic	16.21	13
M24	Aegir_M24_B123	FHGAEOEJ_16.region001	Terpene	Terpene generic	18.25	16
M24	Aegir_M24_B123	FHGAEOEJ_67.region001	RiPP	RiPP-like	10.87	12
M24	Aegir_M24_B123	FHGAEOEJ_73.region001	Other	arylpolyene	38.1	35
M24	Aegir_M24_B124	GBGOCJJP_100.region001	Polyketide	T3PKS	41.06	30
M24	Aegir_M24_B124	GBGOCJJP_67.region001	NRP	NRP generic	29.29	21
M24	Aegir_M24_B124	GBGOCJJP_54.region001	NRP	NRP generic	40.67	30
M24	Aegir_M24_B124	GBGOCJJP_100.region002	Other	resorcinol	23.71	23
M24	Aegir_M24_B124	GBGOCJJP_112.region001	Terpene	Terpene generic	21.87	15
M24	Aegir_M24_B124	GBGOCJJP_84.region001	RiPP	RiPP-like	10.89	7
M24	Aegir_M24_B125	PPEFOLCN_228.region001	RiPP	RiPP-like	5.55	3
M24	Aegir_M24_B125	PPEFOLCN_30.region001	Terpene	Terpene generic	16.7	12
M24	Aegir_M24_B125	PPEFOLCN_686.region001	RiPP	RRE-containing	3.59	4
M24	Aegir_M24_B125	PPEFOLCN_727.region001	RiPP	RiPP-like	9.54	9
M24	Aegir_M24_B126	IGJKKHJM_13.region001	Other	hserlactone	20.64	21
M24	Aegir_M24_B126	IGJKKHJM_35.region001	Other	hserlactone	20.61	23
M24	Aegir_M24_B126	IGJKKHJM_5.region001	Other	betalactone	27.34	26
M24	Aegir_M24_B126	IGJKKHJM_10.region001	Terpene	Terpene generic	20.76	23
M24	Aegir_M24_B127	DHLFLHGA_165.region001	Other	acyl_amino_acids	6.73	7
M24	Aegir_M24_B127	DHLFLHGA_182.region001	RiPP	RRE-containing	5.62	5
M24	Aegir_M24_B127	DHLFLHGA_185.region001	Other	acyl_amino_acids	2.84	3
M24	Aegir_M24_B127	DHLFLHGA_237.region001	Polyketide	T1PKS	8.95	1
M24	Aegir_M24_B127	DHLFLHGA_309.region001	NRP	NRP generic	2.48	1
M24	Aegir_M24_B127	DHLFLHGA_372.region001	Other	arylpolyene	3.53	5
M24	Aegir_M24_B127	DHLFLHGA_497.region001	Polyketide	T3PKS	19	17
M24	Aegir_M24_B127	DHLFLHGA_532.region001	Other	acyl_amino_acids	4.5	3
M24	Aegir_M24_B127	DHLFLHGA_556.region001	NRP	NRP generic	5.38	1
M24	Aegir_M24_B127	DHLFLHGA_603.region001	RiPP	RiPP-like	2.61	3
M24	Aegir_M24_B127	DHLFLHGA_651.region001	Other	acyl_amino_acids	14.78	12
M24	Aegir_M24_B127	DHLFLHGA_661.region001	Other	acyl_amino_acids	6.22	4
M24	Aegir_M24_B127	DHLFLHGA_752.region001	Other	acyl_amino_acids	3.71	3
M24	Aegir_M24_B127	DHLFLHGA_798.region001	Other	acyl_amino_acids	4.03	5
M24	Aegir_M24_B127	DHLFLHGA_872.region001	Other	acyl_amino_acids	2.47	2
M24	Aegir_M24_B127	DHLFLHGA_94.region001	Other	acyl_amino_acids	4.57	4
M24	Aegir_M24_B127	DHLFLHGA_374.region001	Other	acyl_amino_acids	3.26	3
M24	Aegir_M24_B127	DHLFLHGA_342.region001	Other	acyl_amino_acids	2.37	1
M24	Aegir_M24_B127	DHLFLHGA_91.region001	Other	acyl_amino_acids	2.1	3
M24	Aegir_M24_B127	DHLFLHGA_910.region001	Other	acyl_amino_acids	2.33	1
M24	Aegir_M24_B127	DHLFLHGA_921.region001	Other	acyl_amino_acids	2.25	1
M24	Aegir_M24_B128	FDOIAPJH_117.region001	Polyketide	hglE-KS	36.51	26
M24	Aegir_M24_B128	FDOIAPJH_52.region001	RiPP	RiPP-like	10.87	9
M24	Aegir_M24_B129	NPEJHEFM_93.region001	Other	arylpolyene	8.96	8
M24	Aegir_M24_B129	NPEJHEFM_91.region001	Hybrid	arylpolyene:resorcinol	28.4	34
M24	Aegir_M24_B13	HMPFCKPD_12.region001	RiPP	RiPP-like	5.89	7
M24	Aegir_M24_B13	HMPFCKPD_81.region001	Terpene	Terpene generic	15.04	12
M24	Aegir_M24_B13	HMPFCKPD_40.region001	NRP	NRPS-like	30.48	25
M24	Aegir_M24_B130	KOFGBFOK_7.region001	Other	arylpolyene	39.35	37
M24	Aegir_M24_B130	KOFGBFOK_136.region001	Other	hydrogen-cyanide	12.8	11
M24	Aegir_M24_B130	KOFGBFOK_34.region001	NRP	NRPS-like	33.17	24
M24	Aegir_M24_B130	KOFGBFOK_123.region001	Other	betalactone	32.33	32
M24	Aegir_M24_B130	KOFGBFOK_56.region001	RiPP	redox-cofactor	22.12	17
M24	Aegir_M24_B130	KOFGBFOK_139.region001	RiPP	RiPP-like	10.85	12
M24	Aegir_M24_B130	KOFGBFOK_5.region001	Terpene	Terpene generic	19.99	18
M24	Aegir_M24_B131	CIIHKDJI_39.region001	RiPP	redox-cofactor	10.45	11
M24	Aegir_M24_B131	CIIHKDJI_51.region001	RiPP	RiPP-like	10.85	10
M24	Aegir_M24_B131	CIIHKDJI_89.region001	Terpene	Terpene generic	3.7	3
M24	Aegir_M24_B132	BKNNPPBI_130.region001	Hybrid	NRPS-like:T1PKS	26.59	20
M24	Aegir_M24_B132	BKNNPPBI_8.region001	Hybrid	NRPS:T1PKS	39.18	24
M24	Aegir_M24_B14	ANCDLGFE_20.region001	NRP	NRP generic	44.76	35
M24	Aegir_M24_B14	ANCDLGFE_6.region001	Polyketide	hglE-KS	42.41	24
M24	Aegir_M24_B15	LJPEBJAM_258.region001	NRP	NRPS-like	34.24	26
M24	Aegir_M24_B15	LJPEBJAM_68.region001	RiPP	thiopeptide	18.67	16
M24	Aegir_M24_B15	LJPEBJAM_252.region001	Polyketide	T3PKS	25.69	18
M24	Aegir_M24_B16	BBEMPNNE_582.region001	Polyketide	T3PKS	2.15	3
M24	Aegir_M24_B17	JECBHHKC_10.region001	RiPP	RiPP-like	10.93	11
M24	Aegir_M24_B18	BHALFHGL_116.region001	Other	hserlactone	10.74	10
M24	Aegir_M24_B18	BHALFHGL_227.region001	Terpene	Terpene generic	12.39	12
M24	Aegir_M24_B18	BHALFHGL_65.region001	RiPP	RiPP-like	8.62	11
M24	Aegir_M24_B19	FPDLEAHF_158.region001	Other	acyl_amino_acids	4.55	4
M24	Aegir_M24_B19	FPDLEAHF_19.region001	Other	acyl_amino_acids	4.03	3
M24	Aegir_M24_B19	FPDLEAHF_54.region001	RiPP	RiPP-like	7.23	10
M24	Aegir_M24_B19	FPDLEAHF_55.region001	Other	acyl_amino_acids	2.52	2
M24	Aegir_M24_B2	AGHCKNLD_294.region001	NRP	NRPS-like	23.52	18
M24	Aegir_M24_B2	AGHCKNLD_341.region001	Other	arylpolyene	2.85	3
M24	Aegir_M24_B2	AGHCKNLD_356.region001	Terpene	Terpene generic	15.07	15
M24	Aegir_M24_B2	AGHCKNLD_385.region001	Terpene	Terpene generic	19.65	17
M24	Aegir_M24_B2	AGHCKNLD_390.region001	Hybrid	T3PKS:RiPP-like	10.05	11
M24	Aegir_M24_B2	AGHCKNLD_436.region001	Polyketide	T1PKS	13.1	8
M24	Aegir_M24_B2	AGHCKNLD_454.region001	Other	arylpolyene	17.19	15
M24	Aegir_M24_B2	AGHCKNLD_459.region001	NRP	NRPS-like	10.41	7
M24	Aegir_M24_B2	AGHCKNLD_664.region001	Terpene	Terpene generic	14.8	8
M24	Aegir_M24_B20	LNMAEBHA_185.region001	Other	arylpolyene	3.99	5
M24	Aegir_M24_B20	LNMAEBHA_220.region001	Terpene	Terpene generic	2.91	2
M24	Aegir_M24_B20	LNMAEBHA_336.region001	Other	arylpolyene	8.22	9
M24	Aegir_M24_B20	LNMAEBHA_188.region001	Other	arylpolyene	5.32	8
M24	Aegir_M24_B21	LHGLAGHD_14.region001	Polyketide	T3PKS	24.03	27
M24	Aegir_M24_B21	LHGLAGHD_19.region001	Terpene	Terpene generic	3.56	5
M24	Aegir_M24_B21	LHGLAGHD_27.region001	Other	hserlactone	20.62	19
M24	Aegir_M24_B21	LHGLAGHD_31.region001	Terpene	Terpene generic	17.28	15
M24	Aegir_M24_B21	LHGLAGHD_31.region002	RiPP	thioamitides	22.55	23
M24	Aegir_M24_B21	LHGLAGHD_58.region001	RiPP	RiPP-like	10.9	7
M24	Aegir_M24_B22	BBBCDLJB_1055.region001	Terpene	Terpene generic	5.15	6
M24	Aegir_M24_B22	BBBCDLJB_1223.region001	NRP	NRPS-like	2.71	2
M24	Aegir_M24_B22	BBBCDLJB_1301.region001	Terpene	Terpene generic	12.38	12
M24	Aegir_M24_B22	BBBCDLJB_243.region001	NRP	NRPS-like	3.72	4
M24	Aegir_M24_B22	BBBCDLJB_989.region001	RiPP	RiPP-like	4.01	3
M24	Aegir_M24_B23	EKPCADKE_145.region001	RiPP	RiPP-like	10.86	12
M24	Aegir_M24_B23	EKPCADKE_53.region001	Hybrid	NRPS-like:T1PKS	52.12	37
M24	Aegir_M24_B24	FPPHCGEG_1.region001	RiPP	RiPP-like	10.89	8
M24	Aegir_M24_B24	FPPHCGEG_7.region001	RiPP	RiPP-like	10.88	10
M24	Aegir_M24_B24	FPPHCGEG_7.region002	Terpene	Terpene generic	25.06	21
M24	Aegir_M24_B25	GCPKHDHJ_105.region001	RiPP	RiPP-like	6.64	5
M24	Aegir_M24_B25	GCPKHDHJ_4.region001	Terpene	Terpene generic	17.68	17
M24	Aegir_M24_B25	GCPKHDHJ_85.region001	NRP	NRPS-like	5.81	2
M24	Aegir_M24_B25	GCPKHDHJ_110.region001	RiPP	RiPP-like	10.13	9
M24	Aegir_M24_B26	BLIMOGOC_29.region001	Hybrid	arylpolyene:resorcinol	38.45	37
M24	Aegir_M24_B26	BLIMOGOC_49.region001	RiPP	RRE-containing	20.25	18
M24	Aegir_M24_B27	MGMOCMNP_146.region001	Polyketide	T1PKS	7.65	3
M24	Aegir_M24_B27	MGMOCMNP_205.region001	Polyketide	T1PKS	12.49	4
M24	Aegir_M24_B27	MGMOCMNP_243.region001	NRP	CDPS	4.57	5
M24	Aegir_M24_B28	HMICOCJM_92.region001	Terpene	Terpene generic	14.39	11
M24	Aegir_M24_B28	HMICOCJM_34.region001	Other	hydrogen-cyanide	7.16	7
M24	Aegir_M24_B28	HMICOCJM_151.region001	RiPP	RiPP-like	10.85	12
M24	Aegir_M24_B28	HMICOCJM_48.region001	Other	hserlactone	20.2	24
M24	Aegir_M24_B28	HMICOCJM_14.region001	Other	hserlactone	11.9	11
M24	Aegir_M24_B28	HMICOCJM_39.region001	Other	arylpolyene	7.56	9
M24	Aegir_M24_B28	HMICOCJM_86.region001	RiPP	redox-cofactor	17.38	21
M24	Aegir_M24_B29	IMEAMOFF_101.region001	RiPP	RiPP-like	10.93	10
M24	Aegir_M24_B29	IMEAMOFF_58.region001	RiPP	RiPP-like	11.74	8
M24	Aegir_M24_B29	IMEAMOFF_76.region001	Terpene	Terpene generic	20.9	21
M24	Aegir_M24_B3	CKOFCMJB_197.region001	RiPP	RRE-containing	5.88	8
M24	Aegir_M24_B3	CKOFCMJB_220.region001	Terpene	Terpene generic	18.64	14
M24	Aegir_M24_B3	CKOFCMJB_305.region001	Polyketide	T1PKS	4.5	1
M24	Aegir_M24_B3	CKOFCMJB_441.region001	Other	arylpolyene	16.11	16
M24	Aegir_M24_B3	CKOFCMJB_781.region001	RiPP	RiPP-like	2.83	3
M24	Aegir_M24_B3	CKOFCMJB_840.region001	Other	phosphonate	7.65	5
M24	Aegir_M24_B31	LKIEJCHL_188.region001	NRP	NRP generic	6.63	2
M24	Aegir_M24_B31	LKIEJCHL_352.region001	NRP	NRPS-like	18.97	16
M24	Aegir_M24_B31	LKIEJCHL_469.region001	NRP	NRPS-like	4.87	3
M24	Aegir_M24_B31	LKIEJCHL_511.region001	Other	arylpolyene	11.2	10
M24	Aegir_M24_B31	LKIEJCHL_180.region001	Other	resorcinol	4.83	4
M24	Aegir_M24_B31	LKIEJCHL_517.region001	NRP	NRP generic	34.6	26
M24	Aegir_M24_B32	CGGEEMNC_101.region001	RiPP	RRE-containing	19.9	15
M24	Aegir_M24_B32	CGGEEMNC_595.region001	Terpene	Terpene generic	10.92	9
M24	Aegir_M24_B32	CGGEEMNC_285.region001	RiPP	sactipeptide	16.77	13
M24	Aegir_M24_B34	OINKMAKN_30.region001	Terpene	Terpene generic	20.84	21
M24	Aegir_M24_B35	OAFPEDIB_21.region001	RiPP	RiPP-like	6.85	9
M24	Aegir_M24_B35	OAFPEDIB_67.region001	RiPP	RiPP-like	10.85	11
M24	Aegir_M24_B36	CFEKOEEO_18.region001	RiPP	RiPP-like	10.86	6
M24	Aegir_M24_B36	CFEKOEEO_200.region001	Other	betalactone	18.38	16
M24	Aegir_M24_B36	CFEKOEEO_225.region001	Polyketide	T3PKS	11.11	9
M24	Aegir_M24_B36	CFEKOEEO_299.region001	Hybrid	hglE-KS:T1PKS	21.46	10
M24	Aegir_M24_B36	CFEKOEEO_38.region001	Other	arylpolyene	34.53	33
M24	Aegir_M24_B36	CFEKOEEO_49.region001	Other	arylpolyene	15.5	8
M24	Aegir_M24_B36	CFEKOEEO_84.region001	Other	acyl_amino_acids	28.55	12
M24	Aegir_M24_B37	FGBPHCAI_36.region001	RiPP	RRE-containing	15.67	10
M24	Aegir_M24_B37	FGBPHCAI_85.region001	Hybrid	NRPS:T1PKS	38.16	17
M24	Aegir_M24_B38	BMKALGPG_1284.region001	RiPP	ranthipeptide	8.63	8
M24	Aegir_M24_B38	BMKALGPG_263.region001	Other	arylpolyene	2.04	3
M24	Aegir_M24_B38	BMKALGPG_376.region001	RiPP	RiPP-like	4.15	5
M24	Aegir_M24_B38	BMKALGPG_386.region001	Terpene	Terpene generic	2.69	3
M24	Aegir_M24_B38	BMKALGPG_966.region001	Other	arylpolyene	2.47	4
M24	Aegir_M24_B39	PINHJFLC_1053.region001	Other	acyl_amino_acids	3.18	2
M24	Aegir_M24_B39	PINHJFLC_1183.region001	Other	hserlactone	3.93	3
M24	Aegir_M24_B39	PINHJFLC_264.region001	Other	arylpolyene	3.6	4
M24	Aegir_M24_B39	PINHJFLC_32.region001	Other	acyl_amino_acids	2.88	2
M24	Aegir_M24_B39	PINHJFLC_725.region001	Other	acyl_amino_acids	3.17	4
M24	Aegir_M24_B39	PINHJFLC_738.region001	Polyketide	T1PKS	10.84	3
M24	Aegir_M24_B39	PINHJFLC_821.region001	Other	arylpolyene	5.07	6
M24	Aegir_M24_B39	PINHJFLC_128.region001	Other	acyl_amino_acids	2.01	2
M24	Aegir_M24_B4	EAPIMLMG_20.region001	RiPP	RRE-containing	10.49	19
M24	Aegir_M24_B4	EAPIMLMG_60.region001	RiPP	RiPP-like	5.7	7
M24	Aegir_M24_B40	ADFKEOCB_5.region001	Other	arylpolyene	4.35	6
M24	Aegir_M24_B41	AOLGDHFD_58.region001	RiPP	RRE-containing	6.23	6
M24	Aegir_M24_B42	BCGFPKJE_21.region001	Polyketide	T1PKS	47.55	34
M24	Aegir_M24_B42	BCGFPKJE_30.region001	NRP	NRP generic	44.78	30
M24	Aegir_M24_B42	BCGFPKJE_33.region001	Hybrid	hserlactone:RiPP-redox-cofactor	42.22	33
M24	Aegir_M24_B42	BCGFPKJE_42.region001	Terpene	Terpene generic	20.82	16
M24	Aegir_M24_B42	BCGFPKJE_44.region001	RiPP	lassopeptide	19.44	16
M24	Aegir_M24_B42	BCGFPKJE_47.region001	Other	hydrogen-cyanide	17.65	16
M24	Aegir_M24_B43	NJFLMENO_160.region001	NRP	NRPS-like	5.48	4
M24	Aegir_M24_B43	NJFLMENO_88.region001	RiPP	RiPP-like	6.48	8
M24	Aegir_M24_B44	LIEFECIJ_14.region001	RiPP	RiPP-like	10.85	11
M24	Aegir_M24_B44	LIEFECIJ_31.region001	NRP	NRP generic	43.83	36
M24	Aegir_M24_B44	LIEFECIJ_5.region001	Other	ectoine	10.39	8
M24	Aegir_M24_B44	LIEFECIJ_66.region001	Other	arylpolyene	37.27	35
M24	Aegir_M24_B44	LIEFECIJ_32.region001	RiPP	redox-cofactor	22.12	24
M24	Aegir_M24_B44	LIEFECIJ_65.region001	Terpene	Terpene generic	16.67	12
M24	Aegir_M24_B45	DPHDEEHI_103.region001	Polyketide	hglE-KS	34.87	23
M24	Aegir_M24_B45	DPHDEEHI_146.region001	Other	arylpolyene	44.2	39
M24	Aegir_M24_B45	DPHDEEHI_174.region001	RiPP	RRE-containing	14.81	12
M24	Aegir_M24_B45	DPHDEEHI_191.region001	NRP	NRPS-like	36.11	27
M24	Aegir_M24_B45	DPHDEEHI_35.region001	NRP	NRPS-like	29.03	20
M24	Aegir_M24_B45	DPHDEEHI_44.region001	Hybrid	NRPS-like:hglE-KS	33.41	26
M24	Aegir_M24_B45	DPHDEEHI_70.region001	Polyketide	hglE-KS	34.19	20
M24	Aegir_M24_B45	DPHDEEHI_71.region001	RiPP	RiPP-like	10.67	11
M24	Aegir_M24_B45	DPHDEEHI_74.region001	Polyketide	hglE-KS	18.03	5
M24	Aegir_M24_B45	DPHDEEHI_89.region001	RiPP	RiPP-like	10.71	10
M24	Aegir_M24_B45	DPHDEEHI_9.region001	Polyketide	T1PKS	22.88	14
M24	Aegir_M24_B46	GPNBCOBB_313.region001	Terpene	Terpene generic	4.47	2
M24	Aegir_M24_B49	MHNLAKHI_127.region001	RiPP	RiPP-like	6.81	6
M24	Aegir_M24_B49	MHNLAKHI_132.region001	RiPP	RiPP-like	7.99	11
M24	Aegir_M24_B49	MHNLAKHI_243.region001	NRP	NRP generic	4.46	2
M24	Aegir_M24_B49	MHNLAKHI_259.region001	Terpene	Terpene generic	14.83	15
M24	Aegir_M24_B49	MHNLAKHI_266.region001	RiPP	RiPP-like	5.26	6
M24	Aegir_M24_B5	HPFIMPEI_97.region001	RiPP	RiPP-like	10.85	9
M24	Aegir_M24_B5	HPFIMPEI_152.region001	RiPP	redox-cofactor	22.13	22
M24	Aegir_M24_B5	HPFIMPEI_24.region001	Other	hydrogen-cyanide	12.8	12
M24	Aegir_M24_B5	HPFIMPEI_13.region001	RiPP	RiPP-like	6.71	8
M24	Aegir_M24_B5	HPFIMPEI_6.region001	Terpene	Terpene generic	17.45	14
M24	Aegir_M24_B5	HPFIMPEI_63.region001	NRP	NRP generic	36.45	23
M24	Aegir_M24_B5	HPFIMPEI_130.region001	Other	arylpolyene	29.76	26
M24	Aegir_M24_B5	HPFIMPEI_152.region002	RiPP	RiPP-like	11.61	12
M24	Aegir_M24_B50	ICBNPDEL_21.region001	Other	acyl_amino_acids	4.18	4
M24	Aegir_M24_B50	ICBNPDEL_84.region001	RiPP	RiPP-like	2.73	3
M24	Aegir_M24_B51	CLBBIEOL_10.region001	Other	acyl_amino_acids	20.12	18
M24	Aegir_M24_B51	CLBBIEOL_167.region001	Polyketide	T1PKS	31.94	17
M24	Aegir_M24_B51	CLBBIEOL_78.region001	RiPP	RiPP-like	4.81	5
M24	Aegir_M24_B52	JLMBNEBE_3.region001	Other	PUFA	9.64	3
M24	Aegir_M24_B52	JLMBNEBE_91.region001	Other	hserlactone	18.69	16
M24	Aegir_M24_B52	JLMBNEBE_99.region001	RiPP	RiPP-like	11.73	12
M24	Aegir_M24_B53	GFACKNHO_178.region001	RiPP	RRE-containing	13.96	10
M24	Aegir_M24_B53	GFACKNHO_114.region001	NRP	NRPS-like	8.26	4
M24	Aegir_M24_B53	GFACKNHO_126.region001	Hybrid	NRPS:NRPS-like	67.98	19
M24	Aegir_M24_B53	GFACKNHO_13.region001	Terpene	Terpene generic	21.7	12
M24	Aegir_M24_B53	GFACKNHO_163.region001	Hybrid	NRPS:T1PKS	14.91	3
M24	Aegir_M24_B54	DONGBMFP_1052.region001	RiPP	microviridin	11.54	7
M24	Aegir_M24_B54	DONGBMFP_1148.region001	Polyketide	T3PKS	4.75	5
M24	Aegir_M24_B54	DONGBMFP_1227.region001	NRP	NRPS-like	3.34	3
M24	Aegir_M24_B54	DONGBMFP_1254.region001	NRP	NRPS-like	2.85	1
M24	Aegir_M24_B54	DONGBMFP_230.region001	RiPP	RRE-containing	2.66	4
M24	Aegir_M24_B54	DONGBMFP_330.region001	RiPP	RiPP-like	5.85	7
M24	Aegir_M24_B54	DONGBMFP_433.region001	RiPP	RiPP-like	2.2	3
M24	Aegir_M24_B54	DONGBMFP_906.region001	RiPP	RiPP-like	3.13	5
M24	Aegir_M24_B54	DONGBMFP_925.region001	RiPP	RiPP-like	5.65	5
M24	Aegir_M24_B55	BKMJBOJD_153.region001	Other	hserlactone	17.8	17
M24	Aegir_M24_B55	BKMJBOJD_20.region001	Terpene	Terpene generic	15.21	15
M24	Aegir_M24_B55	BKMJBOJD_29.region001	Other	hserlactone	5.45	5
M24	Aegir_M24_B56	DBCHONDG_311.region001	RiPP	RRE-containing	2.79	2
M24	Aegir_M24_B57	APDGDMMD_266.region001	RiPP	RiPP-like	8.34	8
M24	Aegir_M24_B57	APDGDMMD_277.region001	NRP	NRPS-like	4.74	3
M24	Aegir_M24_B57	APDGDMMD_326.region001	Terpene	Terpene generic	11.84	8
M24	Aegir_M24_B57	APDGDMMD_66.region001	Polyketide	T3PKS	18.74	20
M24	Aegir_M24_B57	APDGDMMD_93.region001	Terpene	Terpene generic	12.66	9
M24	Aegir_M24_B58	GNKANFNI_62.region001	RiPP	RiPP-like	10.85	11
M24	Aegir_M24_B58	GNKANFNI_27.region001	NRP	NRP generic	35.01	26
M24	Aegir_M24_B58	GNKANFNI_31.region001	RiPP	ranthipeptide	21.38	20
M24	Aegir_M24_B58	GNKANFNI_21.region001	Terpene	Terpene generic	23.07	19
M24	Aegir_M24_B58	GNKANFNI_29.region001	Hybrid	NRPS:T1PKS	49.4	40
M24	Aegir_M24_B58	GNKANFNI_74.region001	Terpene	Terpene generic	22.35	16
M24	Aegir_M24_B59	ECACJCPL_169.region001	NRP	NRP generic	21.02	10
M24	Aegir_M24_B59	ECACJCPL_19.region001	Terpene	Terpene generic	13.8	8
M24	Aegir_M24_B59	ECACJCPL_224.region001	Hybrid	NRPS:NRPS-like:T1PKS	68.09	25
M24	Aegir_M24_B59	ECACJCPL_81.region001	Polyketide	hglE-KS	46.83	30
M24	Aegir_M24_B6	KKNDCODD_112.region001	Polyketide	hglE-KS	13.2	4
M24	Aegir_M24_B6	KKNDCODD_368.region001	NRP	NRP generic	25.57	10
M24	Aegir_M24_B60	NNEBPJHD_12.region001	Other	hserlactone	20.61	25
M24	Aegir_M24_B60	NNEBPJHD_30.region001	Hybrid	NRPS-like:T1PKS	31.95	17
M24	Aegir_M24_B60	NNEBPJHD_31.region001	Other	hserlactone	20.64	19
M24	Aegir_M24_B60	NNEBPJHD_42.region001	Other	hserlactone	20.59	25
M24	Aegir_M24_B60	NNEBPJHD_76.region001	Terpene	Terpene generic	8.18	8
M24	Aegir_M24_B61	JFGKALPH_198.region001	Polyketide	T1PKS	3.65	1
M24	Aegir_M24_B61	JFGKALPH_60.region001	NRP	CDPS	10.77	13
M24	Aegir_M24_B61	JFGKALPH_8.region001	Polyketide	T1PKS	9.61	4
M24	Aegir_M24_B62	OOCMFLME_168.region001	Hybrid	NRPS:T1PKS	26.75	15
M24	Aegir_M24_B62	OOCMFLME_373.region001	NRP	NRPS-like	4.4	2
M24	Aegir_M24_B62	OOCMFLME_400.region001	Other	hserlactone	3.65	4
M24	Aegir_M24_B62	OOCMFLME_185.region001	RiPP	RiPP-like	7.8	7
M24	Aegir_M24_B62	OOCMFLME_19.region001	Polyketide	T1PKS	24.06	17
M24	Aegir_M24_B62	OOCMFLME_120.region001	Other	arylpolyene	22.33	20
M24	Aegir_M24_B62	OOCMFLME_47.region001	RiPP	redox-cofactor	19.71	20
M24	Aegir_M24_B62	OOCMFLME_363.region001	Terpene	Terpene generic	12.43	9
M24	Aegir_M24_B63	EMAKPJIN_125.region001	NRP	NRPS-like	24.43	19
M24	Aegir_M24_B63	EMAKPJIN_200.region001	NRP	NRPS-like	2.79	2
M24	Aegir_M24_B63	EMAKPJIN_65.region001	Terpene	Terpene generic	12.44	12
M24	Aegir_M24_B64	LAELCMDN_357.region001	RiPP	RiPP-like	7.83	6
M24	Aegir_M24_B64	LAELCMDN_4.region001	Polyketide	T3PKS	19.88	15
M24	Aegir_M24_B65	HEPNEEPN_401.region001	Polyketide	T3PKS	2.23	2
M24	Aegir_M24_B66	ABLFJFHB_285.region001	Polyketide	T3PKS	41.18	32
M24	Aegir_M24_B66	ABLFJFHB_319.region001	RiPP	RiPP-like	6.76	7
M24	Aegir_M24_B66	ABLFJFHB_53.region001	RiPP	RiPP-like	11.46	7
M24	Aegir_M24_B66	ABLFJFHB_55.region001	Other	resorcinol	32.45	29
M24	Aegir_M24_B66	ABLFJFHB_66.region001	Polyketide	hglE-KS	23.17	7
M24	Aegir_M24_B67	DHIBOGDD_112.region001	RiPP	RiPP-like	6.04	5
M24	Aegir_M24_B67	DHIBOGDD_126.region001	Polyketide	T1PKS	12.22	7
M24	Aegir_M24_B67	DHIBOGDD_328.region001	RiPP	ranthipeptide	11.5	8
M24	Aegir_M24_B67	DHIBOGDD_48.region001	Hybrid	NRPS-like:T1PKS	23.5	12
M24	Aegir_M24_B67	DHIBOGDD_85.region001	Other	arylpolyene	17.84	17
M24	Aegir_M24_B68	BPKPMAHG_11.region001	RiPP	RRE-containing	6.37	9
M24	Aegir_M24_B68	BPKPMAHG_91.region001	RiPP	RiPP-like	4.73	3
M24	Aegir_M24_B7	LKKEPBNP_44.region001	RiPP	microviridin	15.57	18
M24	Aegir_M24_B7	LKKEPBNP_92.region001	RiPP	lanthipeptide	14.87	12
M24	Aegir_M24_B70	KKGMONJA_202.region001	NRP	NRP generic	5.24	1
M24	Aegir_M24_B70	KKGMONJA_205.region001	Other	arylpolyene	13.56	15
M24	Aegir_M24_B70	KKGMONJA_90.region001	RiPP	RiPP-like	3.4	3
M24	Aegir_M24_B71	GIIHCCLI_264.region001	Terpene	Terpene generic	17.79	15
M24	Aegir_M24_B71	GIIHCCLI_314.region001	Terpene	Terpene generic	4.29	4
M24	Aegir_M24_B71	GIIHCCLI_385.region001	RiPP	RiPP-like	2.5	4
M24	Aegir_M24_B71	GIIHCCLI_458.region001	Terpene	Terpene generic	16.91	10
M24	Aegir_M24_B71	GIIHCCLI_615.region001	Terpene	Terpene generic	7.66	7
M24	Aegir_M24_B72	AMCEHCFD_106.region001	RiPP	lanthipeptide	16.7	11
M24	Aegir_M24_B72	AMCEHCFD_117.region001	Polyketide	T1PKS	20.35	10
M24	Aegir_M24_B72	AMCEHCFD_131.region001	RiPP	lanthipeptide	24.3	18
M24	Aegir_M24_B72	AMCEHCFD_148.region001	RiPP	microviridin	12.82	10
M24	Aegir_M24_B72	AMCEHCFD_164.region001	NRP	NRP generic	30.91	18
M24	Aegir_M24_B72	AMCEHCFD_170.region001	Other	arylpolyene	30.31	26
M24	Aegir_M24_B72	AMCEHCFD_175.region001	Other	resorcinol	41.84	34
M24	Aegir_M24_B72	AMCEHCFD_175.region002	Terpene	Terpene generic	14.96	14
M24	Aegir_M24_B72	AMCEHCFD_185.region001	Hybrid	NRPS:T1PKS	105.77	20
M24	Aegir_M24_B72	AMCEHCFD_61.region001	RiPP	RiPP-like	11.14	9
M24	Aegir_M24_B72	AMCEHCFD_70.region001	Hybrid	arylpolyene:resorcinol	39.07	40
M24	Aegir_M24_B72	AMCEHCFD_80.region001	RiPP	RiPP-like	6.13	6
M24	Aegir_M24_B72	AMCEHCFD_85.region001	Polyketide	T3PKS	34.66	32
M24	Aegir_M24_B72	AMCEHCFD_9.region001	Hybrid	NRPS:T3PKS	41.88	32
M24	Aegir_M24_B73	CBMKINBK_102.region001	RiPP	RiPP-like	9.31	9
M24	Aegir_M24_B73	CBMKINBK_13.region001	RiPP	RiPP-like	9.11	8
M24	Aegir_M24_B73	CBMKINBK_66.region001	Hybrid	thioamide:arylpolyene	53.02	51
M24	Aegir_M24_B73	CBMKINBK_92.region001	Polyketide	T1PKS	16.63	7
M24	Aegir_M24_B75	NCJJNLBN_17.region001	NRP	NRP generic	29.69	22
M24	Aegir_M24_B75	NCJJNLBN_30.region001	Other	arylpolyene	21.73	23
M24	Aegir_M24_B75	NCJJNLBN_36.region001	Other	arylpolyene	22.2	18
M24	Aegir_M24_B75	NCJJNLBN_41.region001	RiPP	RiPP-like	9.85	9
M24	Aegir_M24_B75	NCJJNLBN_5.region001	Other	hserlactone	14.17	14
M24	Aegir_M24_B75	NCJJNLBN_60.region001	Terpene	Terpene generic	18.74	15
M24	Aegir_M24_B75	NCJJNLBN_70.region001	NRP	NRP generic	8.79	4
M24	Aegir_M24_B76	HJAPGIAM_128.region001	Terpene	Terpene generic	12.38	15
M24	Aegir_M24_B76	HJAPGIAM_132.region001	Other	hserlactone	20.59	18
M24	Aegir_M24_B76	HJAPGIAM_37.region001	RiPP	RiPP-like	10.86	15
M24	Aegir_M24_B77	OLKFNNDA_23.region001	NRP	NRPS-like	31.6	29
M24	Aegir_M24_B77	OLKFNNDA_53.region001	RiPP	RRE-containing	17	19
M24	Aegir_M24_B78	PPLLNGHE_136.region001	RiPP	RiPP-like	4.12	5
M24	Aegir_M24_B78	PPLLNGHE_239.region001	Other	arylpolyene	7.63	8
M24	Aegir_M24_B78	PPLLNGHE_407.region001	Other	hserlactone	4.88	4
M24	Aegir_M24_B78	PPLLNGHE_578.region001	RiPP	RRE-containing	5.17	6
M24	Aegir_M24_B78	PPLLNGHE_644.region001	RiPP	ranthipeptide	5.62	5
M24	Aegir_M24_B8	ONKHKEEE_135.region001	Other	arylpolyene	10.51	10
M24	Aegir_M24_B8	ONKHKEEE_33.region001	Other	resorcinol	5.55	8
M24	Aegir_M24_B8	ONKHKEEE_51.region001	Other	arylpolyene	10.44	12
M24	Aegir_M24_B8	ONKHKEEE_248.region001	Other	arylpolyene	3.4	4
M24	Aegir_M24_B80	BELJCDKK_13.region001	Other	betalactone	22.22	20
M24	Aegir_M24_B80	BELJCDKK_27.region001	Other	betalactone	28.81	23
M24	Aegir_M24_B80	BELJCDKK_32.region001	RiPP	thioamitides	22.05	19
M24	Aegir_M24_B80	BELJCDKK_3.region001	RiPP	RiPP-like	11.93	8
M24	Aegir_M24_B84	NEHKBEFE_18.region001	RiPP	redox-cofactor	21.07	23
M24	Aegir_M24_B84	NEHKBEFE_104.region001	RiPP	RiPP-like	8.53	10
M24	Aegir_M24_B84	NEHKBEFE_37.region001	RiPP	RiPP-like	11.74	9
M24	Aegir_M24_B84	NEHKBEFE_102.region001	RiPP	RiPP-like	10.19	12
M24	Aegir_M24_B84	NEHKBEFE_120.region001	Terpene	Terpene generic	12.6	13
M24	Aegir_M24_B85	NDABMHGF_639.region001	Polyketide	T1PKS	10.6	4
M24	Aegir_M24_B85	NDABMHGF_124.region001	RiPP	RRE-containing	9.32	7
M24	Aegir_M24_B86	FFEJCLNM_180.region001	NRP	NRPS-like	2.34	1
M24	Aegir_M24_B86	FFEJCLNM_20.region001	NRP	NRPS-like	2.54	1
M24	Aegir_M24_B86	FFEJCLNM_237.region001	Other	acyl_amino_acids	10.96	8
M24	Aegir_M24_B86	FFEJCLNM_296.region001	Other	acyl_amino_acids	2.51	3
M24	Aegir_M24_B86	FFEJCLNM_2.region001	RiPP	RRE-containing	4.02	3
M24	Aegir_M24_B86	FFEJCLNM_332.region001	Other	acyl_amino_acids	10.37	7
M24	Aegir_M24_B86	FFEJCLNM_419.region001	Other	acyl_amino_acids	4.26	5
M24	Aegir_M24_B86	FFEJCLNM_44.region001	RiPP	RRE-containing	5.32	9
M24	Aegir_M24_B86	FFEJCLNM_493.region001	Other	acyl_amino_acids	3.56	2
M24	Aegir_M24_B86	FFEJCLNM_526.region001	Other	acyl_amino_acids	5.08	3
M24	Aegir_M24_B86	FFEJCLNM_56.region001	Polyketide	T3PKS	2.67	2
M24	Aegir_M24_B86	FFEJCLNM_571.region001	NRP	NRPS-like	6.24	3
M24	Aegir_M24_B86	FFEJCLNM_179.region001	Other	acyl_amino_acids	2.01	1
M24	Aegir_M24_B86	FFEJCLNM_518.region001	Other	acyl_amino_acids	2.19	2
M24	Aegir_M24_B86	FFEJCLNM_334.region001	Other	acyl_amino_acids	2.5	2
M24	Aegir_M24_B87	NNENBOCK_130.region001	RiPP	RRE-containing	14.29	12
M24	Aegir_M24_B87	NNENBOCK_153.region001	Hybrid	arylpolyene:resorcinol	9.27	12
M24	Aegir_M24_B88	OBCMDBHP_2.region001	RiPP	RRE-containing	15.23	11
M24	Aegir_M24_B88	OBCMDBHP_62.region001	Hybrid	arylpolyene:resorcinol	16.09	20
M24	Aegir_M24_B88	OBCMDBHP_27.region001	Other	arylpolyene	13.8	14
M24	Aegir_M24_B89	HNEPLFDD_177.region001	Other	hydrogen-cyanide	8.57	7
M24	Aegir_M24_B89	HNEPLFDD_308.region001	RiPP	RRE-containing	2.71	4
M24	Aegir_M24_B89	HNEPLFDD_357.region001	RiPP	RiPP-like	8.06	8
M24	Aegir_M24_B9	OIHBEECM_88.region001	Polyketide	T3PKS	21.18	21
M24	Aegir_M24_B9	OIHBEECM_23.region001	RiPP	RiPP-like	9.71	10
M24	Aegir_M24_B9	OIHBEECM_68.region001	Other	betalactone	19.23	14
M24	Aegir_M24_B90	PPCPAABK_16.region001	RiPP	RRE-containing	20.25	21
M24	Aegir_M24_B90	PPCPAABK_24.region001	RiPP	RiPP-like	10.9	12
M24	Aegir_M24_B90	PPCPAABK_30.region001	NRP	NRPS-like	23.4	23
M24	Aegir_M24_B90	PPCPAABK_38.region001	Other	arylpolyene	30.36	34
M24	Aegir_M24_B90	PPCPAABK_55.region001	Terpene	Terpene generic	12.12	13
M24	Aegir_M24_B90	PPCPAABK_5.region001	RiPP	RiPP-like	6.86	8
M24	Aegir_M24_B91	BKBAFHKC_13.region001	RiPP	RiPP-like	10.85	12
M24	Aegir_M24_B91	BKBAFHKC_15.region001	RiPP	RiPP-like	10.84	6
M24	Aegir_M24_B91	BKBAFHKC_20.region001	Terpene	Terpene generic	11.4	10
M24	Aegir_M24_B92	NJPCPLPI_182.region001	Other	arylpolyene	20.84	21
M24	Aegir_M24_B92	NJPCPLPI_338.region001	Hybrid	arylpolyene:resorcinol	17.09	19
M24	Aegir_M24_B92	NJPCPLPI_86.region001	Hybrid	NRPS:T1PKS	18.73	5
M24	Aegir_M24_B93	BHGFJBKP_40.region001	RiPP	RiPP-like	10.84	10
M24	Aegir_M24_B93	BHGFJBKP_77.region001	RiPP	RiPP-like	8.63	10
M24	Aegir_M24_B93	BHGFJBKP_123.region001	NRP	NRPS-like	27.32	25
M24	Aegir_M24_B94	FBDIKMAG_101.region001	Polyketide	hglE-KS	54.39	36
M24	Aegir_M24_B94	FBDIKMAG_31.region001	RiPP	RiPP-like	6	6
M24	Aegir_M24_B95	CEPJKJNM_37.region001	Other	arylpolyene	14.87	14
M24	Aegir_M24_B95	CEPJKJNM_69.region001	RiPP	RiPP-like	7.12	6
M24	Aegir_M24_B95	CEPJKJNM_7.region001	RiPP	RRE-containing	5.65	9
M24	Aegir_M24_B96	BGMMDEHE_185.region001	Polyketide	T1PKS	14.13	9
M24	Aegir_M24_B96	BGMMDEHE_259.region001	RiPP	RiPP-like	10.86	8
M24	Aegir_M24_B96	BGMMDEHE_302.region001	Other	acyl_amino_acids	10.78	9
M24	Aegir_M24_B96	BGMMDEHE_41.region001	Other	acyl_amino_acids	10.52	10
M24	Aegir_M24_B96	BGMMDEHE_42.region001	RiPP	RiPP-like	6.73	5
M24	Aegir_M24_B97	FINALPNG_12.region001	RiPP	RRE-containing	20.63	24
M24	Aegir_M24_B97	FINALPNG_1.region001	Terpene	Terpene generic	20.73	19
M24	Aegir_M24_B97	FINALPNG_23.region001	RiPP	RiPP-like	10.85	14
M24	Aegir_M24_B97	FINALPNG_30.region001	Other	hserlactone	20.65	19
M24	Aegir_M24_B97	FINALPNG_6.region001	Polyketide	T1PKS	44.64	44
M24	Aegir_M24_B98	PCFAOBBO_181.region001	NRP	NRPS-like	6.58	3
M24	Aegir_M24_B98	PCFAOBBO_341.region001	Other	hserlactone	6.56	8
M24	Aegir_M24_B98	PCFAOBBO_430.region001	Other	hserlactone	3.77	3
M24	Aegir_M24_B98	PCFAOBBO_92.region001	RiPP	RiPP-like	7.92	12
M24	Aegir_M24_B99	FNLHKMGP_101.region001	RiPP	redox-cofactor	22.14	24
M24	Aegir_M24_B99	FNLHKMGP_102.region001	Other	hserlactone	6.85	6
M24	Aegir_M24_B99	FNLHKMGP_129.region001	Other	hserlactone	20.71	17
M24	Aegir_M24_B99	FNLHKMGP_242.region001	RiPP	RiPP-like	8.3	9
M24	Aegir_M24_B99	FNLHKMGP_250.region001	NRP	NRPS-like	10.37	3
M25	Aegir_M25_B1	GJBGJFNG_177.region001	RiPP	RiPP-like	6.83	9
M25	Aegir_M25_B1	GJBGJFNG_85.region001	Terpene	Terpene generic	11.6	11
M25	Aegir_M25_B10	DBCOEKGD_3.region001	RiPP	RRE-containing	21.29	21
M25	Aegir_M25_B10	DBCOEKGD_6.region002	Hybrid	betalactone:Terpene	28.05	30
M25	Aegir_M25_B10	DBCOEKGD_6.region001	Other	hserlactone	20.59	21
M25	Aegir_M25_B10	DBCOEKGD_28.region001	Other	hserlactone	20.64	21
M25	Aegir_M25_B100	HECEMDOC_14.region001	RiPP	RRE-containing	18.68	19
M25	Aegir_M25_B101	DOCLLKKD_14.region001	RiPP	lanthipeptide	13.07	8
M25	Aegir_M25_B102	KDFDCCFH_32.region001	RiPP	redox-cofactor	13.9	13
M25	Aegir_M25_B102	KDFDCCFH_185.region001	Other	arylpolyene	15.55	16
M25	Aegir_M25_B102	KDFDCCFH_180.region001	RiPP	RiPP-like	10.85	12
M25	Aegir_M25_B102	KDFDCCFH_161.region001	NRP	NRPS-like	19.3	13
M25	Aegir_M25_B102	KDFDCCFH_144.region001	Terpene	Terpene generic	13.01	9
M25	Aegir_M25_B102	KDFDCCFH_46.region001	Other	betalactone	19.18	21
M25	Aegir_M25_B103	ICIFODNN_180.region001	RiPP	RiPP-like	5.33	8
M25	Aegir_M25_B103	ICIFODNN_92.region001	Other	hserlactone	13.13	14
M25	Aegir_M25_B103	ICIFODNN_104.region001	Terpene	Terpene generic	20.77	21
M25	Aegir_M25_B103	ICIFODNN_175.region001	Hybrid	NRPS-like:T1PKS	36.56	24
M25	Aegir_M25_B104	NDACLIJG_151.region001	Other	hydrogen-cyanide	7.57	5
M25	Aegir_M25_B105	LFOILLGL_230.region001	Other	other	4.47	4
M25	Aegir_M25_B105	LFOILLGL_300.region001	RiPP	RiPP-like	7.71	5
M25	Aegir_M25_B106	HFKNKOGN_92.region001	RiPP	RiPP-like	7.09	4
M25	Aegir_M25_B106	HFKNKOGN_136.region001	Terpene	Terpene generic	15.57	16
M25	Aegir_M25_B106	HFKNKOGN_19.region001	RiPP	RiPP-like	8.23	10
M25	Aegir_M25_B106	HFKNKOGN_78.region001	Terpene	Terpene generic	19.28	18
M25	Aegir_M25_B106	HFKNKOGN_118.region001	RiPP	redox-cofactor	21.12	23
M25	Aegir_M25_B106	HFKNKOGN_171.region001	RiPP	RiPP-like	8.69	8
M25	Aegir_M25_B106	HFKNKOGN_90.region001	Other	resorcinol	22.48	17
M25	Aegir_M25_B108	GHKNAMPO_82.region001	RiPP	RiPP-like	7.57	7
M25	Aegir_M25_B108	GHKNAMPO_76.region001	RiPP	redox-cofactor	15.69	13
M25	Aegir_M25_B108	GHKNAMPO_42.region001	RiPP	RiPP-like	7.3	9
M25	Aegir_M25_B108	GHKNAMPO_61.region001	Other	phosphonate	11.36	12
M25	Aegir_M25_B108	GHKNAMPO_140.region001	Terpene	Terpene generic	20.65	19
M25	Aegir_M25_B109	PGHPAOFP_62.region001	RiPP	RiPP-like	5.24	8
M25	Aegir_M25_B11	EIJMIFHJ_250.region001	RiPP	thioamitides	18.55	19
M25	Aegir_M25_B11	EIJMIFHJ_67.region001	RiPP	RiPP-like	6.48	4
M25	Aegir_M25_B110	AEFEIJIB_19.region001	Other	betalactone	3.5	3
M25	Aegir_M25_B110	AEFEIJIB_50.region001	RiPP	RiPP-like	3.81	4
M25	Aegir_M25_B113	OGJEHJAD_24.region001	RiPP	RiPP-like	7.94	8
M25	Aegir_M25_B113	OGJEHJAD_255.region001	RiPP	RiPP-like	2.69	6
M25	Aegir_M25_B115	ADCJAJAL_17.region001	RiPP	ranthipeptide	20.46	21
M25	Aegir_M25_B12	ODBLGFJF_200.region001	Polyketide	T3PKS	35.25	32
M25	Aegir_M25_B12	ODBLGFJF_77.region001	Terpene	Terpene generic	11.87	8
M25	Aegir_M25_B121	MGAKDEPC_197.region001	RiPP	RiPP-like	4.83	5
M25	Aegir_M25_B121	MGAKDEPC_75.region001	RiPP	RiPP-like	4.87	4
M25	Aegir_M25_B122	OPOHHODP_75.region001	Other	arylpolyene	17.22	18
M25	Aegir_M25_B122	OPOHHODP_78.region001	Other	betalactone	16.12	17
M25	Aegir_M25_B122	OPOHHODP_59.region001	Other	arylpolyene	24.46	30
M25	Aegir_M25_B122	OPOHHODP_15.region001	Other	hserlactone	11.41	9
M25	Aegir_M25_B122	OPOHHODP_51.region001	Hybrid	NRPS-like:betalactone	13.97	9
M25	Aegir_M25_B122	OPOHHODP_22.region001	Terpene	Terpene generic	23.09	19
M25	Aegir_M25_B122	OPOHHODP_6.region001	Hybrid	RiPP-redox-cofactor:RiPP-like	24.68	27
M25	Aegir_M25_B123	BJKOHNHC_26.region001	RiPP	RRE-containing	11.92	10
M25	Aegir_M25_B124	MNFECHNJ_15.region001	RiPP	RRE-containing	20.29	13
M25	Aegir_M25_B124	MNFECHNJ_169.region001	NRP	NRP generic	49.07	11
M25	Aegir_M25_B124	MNFECHNJ_54.region001	Hybrid	NRPS:T1PKS	42.17	18
M25	Aegir_M25_B125	EBNFPCOF_137.region001	Hybrid	NRPS:betalactone	28.7	22
M25	Aegir_M25_B125	EBNFPCOF_143.region001	Polyketide	T3PKS	41.05	35
M25	Aegir_M25_B125	EBNFPCOF_168.region001	NRP	NRP generic	30.08	20
M25	Aegir_M25_B125	EBNFPCOF_200.region001	Other	hydrogen-cyanide	12.87	7
M25	Aegir_M25_B125	EBNFPCOF_49.region001	Terpene	Terpene generic	20.48	19
M25	Aegir_M25_B125	EBNFPCOF_5.region001	Hybrid	lassopeptide:RRE-containing	22.63	16
M25	Aegir_M25_B127	JONFJCLF_38.region001	Other	betalactone	18.28	15
M25	Aegir_M25_B127	JONFJCLF_6.region001	Other	siderophore	29.91	26
M25	Aegir_M25_B127	JONFJCLF_7.region002	Terpene	Terpene generic	20.89	14
M25	Aegir_M25_B127	JONFJCLF_3.region001	RiPP	RiPP-like	10.89	13
M25	Aegir_M25_B127	JONFJCLF_6.region002	Other	hydrogen-cyanide	12.95	13
M25	Aegir_M25_B127	JONFJCLF_14.region001	Polyketide	T1PKS	39.47	26
M25	Aegir_M25_B127	JONFJCLF_7.region001	Other	arylpolyene	41.25	43
M25	Aegir_M25_B127	JONFJCLF_31.region001	RiPP	redox-cofactor	22.4	14
M25	Aegir_M25_B128	JGLHPPGP_14.region001	Other	hydrogen-cyanide	12.66	11
M25	Aegir_M25_B129	HDMFDFEC_17.region001	RiPP	RiPP-like	6.07	8
M25	Aegir_M25_B13	IMNOPJAD_11.region001	Hybrid	arylpolyene:T1PKS	73.7	50
M25	Aegir_M25_B13	IMNOPJAD_18.region001	NRP	NRPS-like	44.64	37
M25	Aegir_M25_B13	IMNOPJAD_19.region001	Hybrid	hglE-KS:T1PKS	37.35	25
M25	Aegir_M25_B13	IMNOPJAD_1.region001	Polyketide	T3PKS	41.07	31
M25	Aegir_M25_B13	IMNOPJAD_32.region001	Other	nucleoside	20.93	12
M25	Aegir_M25_B13	IMNOPJAD_45.region001	Terpene	Terpene generic	21.05	18
M25	Aegir_M25_B13	IMNOPJAD_6.region001	RiPP	RiPP-like	11.64	11
M25	Aegir_M25_B130	EMAHDGMJ_94.region001	RiPP	lanthipeptide	12.04	14
M25	Aegir_M25_B130	EMAHDGMJ_79.region001	Hybrid	arylpolyene:resorcinol	44.5	42
M25	Aegir_M25_B131	LMAEHAIC_52.region001	RiPP	RRE-containing	20.24	21
M25	Aegir_M25_B131	LMAEHAIC_71.region001	RiPP	RiPP-like	9.63	9
M25	Aegir_M25_B131	LMAEHAIC_7.region001	NRP	NRPS-like	27.81	18
M25	Aegir_M25_B131	LMAEHAIC_44.region001	RiPP	RiPP-like	10.84	9
M25	Aegir_M25_B132	PAAOCNBG_31.region001	RiPP	RiPP-like	8.94	8
M25	Aegir_M25_B133	HGNBCPJM_141.region001	Terpene	Terpene generic	10.96	11
M25	Aegir_M25_B134	FMDDOPJB_19.region001	RiPP	RRE-containing	6.78	6
M25	Aegir_M25_B134	FMDDOPJB_47.region001	RiPP	RiPP-like	10	10
M25	Aegir_M25_B134	FMDDOPJB_82.region001	Other	phosphonate	8.39	9
M25	Aegir_M25_B136	CDPKENHP_13.region001	RiPP	redox-cofactor	22.2	22
M25	Aegir_M25_B137	COMGHIBO_144.region001	RiPP	ranthipeptide	11.25	11
M25	Aegir_M25_B138	FLOJAPCK_15.region001	Terpene	Terpene generic	20.87	22
M25	Aegir_M25_B138	FLOJAPCK_2.region001	Terpene	Terpene generic	20.87	17
M25	Aegir_M25_B138	FLOJAPCK_8.region001	Other	acyl_amino_acids	60.66	58
M25	Aegir_M25_B139	ANKKBANP_9.region001	Terpene	Terpene generic	21.79	20
M25	Aegir_M25_B139	ANKKBANP_20.region001	RiPP	RiPP-like	10.86	11
M25	Aegir_M25_B14	ENDLLHIJ_101.region001	Terpene	Terpene generic	16.25	13
M25	Aegir_M25_B14	ENDLLHIJ_137.region001	NRP	NRPS-like	4.08	1
M25	Aegir_M25_B14	ENDLLHIJ_181.region001	Polyketide	T1PKS	8.09	2
M25	Aegir_M25_B14	ENDLLHIJ_41.region001	Terpene	Terpene generic	7.21	11
M25	Aegir_M25_B14	ENDLLHIJ_194.region001	Hybrid	NRPS:T1PKS	17.3	5
M25	Aegir_M25_B14	ENDLLHIJ_92.region001	RiPP	RRE-containing	12.27	12
M25	Aegir_M25_B140	FALJKOND_184.region001	RiPP	RiPP-like	9.95	9
M25	Aegir_M25_B142	ACGGOOMM_52.region001	NRP	NRP generic	39.86	26
M25	Aegir_M25_B144	BIHIBKCH_113.region001	Polyketide	T1PKS	43.68	37
M25	Aegir_M25_B144	BIHIBKCH_191.region001	RiPP	RiPP-like	10.86	14
M25	Aegir_M25_B144	BIHIBKCH_38.region001	RiPP	thiopeptide	30.98	22
M25	Aegir_M25_B144	BIHIBKCH_81.region001	RiPP	RiPP-like	8.93	15
M25	Aegir_M25_B146	ELPKCMEI_16.region001	RiPP	RiPP-like	6.46	8
M25	Aegir_M25_B147	PAILNCCF_20.region001	RiPP	RRE-containing	20.64	29
M25	Aegir_M25_B147	PAILNCCF_62.region001	RiPP	RRE-containing	9.95	12
M25	Aegir_M25_B15	FKABDIKP_108.region001	Polyketide	T3PKS	14.54	14
M25	Aegir_M25_B15	FKABDIKP_117.region001	RiPP	RiPP-like	7.33	11
M25	Aegir_M25_B15	FKABDIKP_171.region001	Other	arylpolyene	28.87	28
M25	Aegir_M25_B15	FKABDIKP_255.region001	Terpene	Terpene generic	8.5	8
M25	Aegir_M25_B15	FKABDIKP_276.region001	Other	arylpolyene	31.89	28
M25	Aegir_M25_B15	FKABDIKP_31.region001	RiPP	RiPP-like	4.42	5
M25	Aegir_M25_B15	FKABDIKP_338.region001	RiPP	RiPP-like	9.16	5
M25	Aegir_M25_B15	FKABDIKP_64.region001	Terpene	Terpene generic	15.44	13
M25	Aegir_M25_B153	EMKEAJEM_1158.region001	RiPP	RiPP-like	4.97	7
M25	Aegir_M25_B153	EMKEAJEM_258.region001	Terpene	Terpene generic	3.55	4
M25	Aegir_M25_B153	EMKEAJEM_454.region001	Polyketide	T1PKS	14.54	9
M25	Aegir_M25_B153	EMKEAJEM_816.region001	RiPP	RiPP-like	9.14	8
M25	Aegir_M25_B153	EMKEAJEM_832.region001	RiPP	RiPP-like	5.58	7
M25	Aegir_M25_B153	EMKEAJEM_880.region001	NRP	NRPS-like	2.07	1
M25	Aegir_M25_B154	OEEGLEHL_114.region001	RiPP	RiPP-like	10.83	11
M25	Aegir_M25_B154	OEEGLEHL_66.region001	Terpene	Terpene generic	17.66	18
M25	Aegir_M25_B154	OEEGLEHL_80.region001	RiPP	RRE-containing	20.37	17
M25	Aegir_M25_B155	FNFNEMEO_153.region001	RiPP	RRE-containing	5.74	5
M25	Aegir_M25_B155	FNFNEMEO_18.region001	RiPP	RRE-containing	20.24	24
M25	Aegir_M25_B157	DBICPAKL_73.region001	Hybrid	NRPS-like:RiPP-like	24.78	30
M25	Aegir_M25_B157	DBICPAKL_85.region001	Other	hserlactone	18.62	19
M25	Aegir_M25_B16	EOJPKJHJ_143.region001	RiPP	RRE-containing	20.24	21
M25	Aegir_M25_B163	CFIADAMF_9.region001	RiPP	RiPP-like	8.27	8
M25	Aegir_M25_B164	KPHMFJIM_11.region001	Other	hserlactone	20.27	20
M25	Aegir_M25_B165	BMLCGDAE_197.region001	NRP	NRP generic	2.55	1
M25	Aegir_M25_B165	BMLCGDAE_25.region001	NRP	NRPS-like	3.96	1
M25	Aegir_M25_B165	BMLCGDAE_349.region001	NRP	NRPS-like	2.24	1
M25	Aegir_M25_B165	BMLCGDAE_402.region001	NRP	NRPS-like	3.31	1
M25	Aegir_M25_B165	BMLCGDAE_439.region001	RiPP	RRE-containing	6.18	4
M25	Aegir_M25_B169	CCHPNDJG_140.region001	RiPP	RiPP-like	5.35	9
M25	Aegir_M25_B17	EFPKCKDP_32.region001	Terpene	Terpene generic	7.62	6
M25	Aegir_M25_B17	EFPKCKDP_15.region001	RiPP	RiPP-like	10.97	12
M25	Aegir_M25_B170	ELAIDHFC_130.region001	RiPP	RiPP-like	11.56	11
M25	Aegir_M25_B170	ELAIDHFC_25.region001	Other	arylpolyene	23.33	20
M25	Aegir_M25_B170	ELAIDHFC_80.region001	Hybrid	arylpolyene:resorcinol	22.89	25
M25	Aegir_M25_B171	JBCKNOCK_1.region001	Terpene	Terpene generic	20.25	15
M25	Aegir_M25_B171	JBCKNOCK_234.region001	RiPP	redox-cofactor	10.03	12
M25	Aegir_M25_B172	CCGMBFFG_587.region001	RiPP	RRE-containing	4.03	5
M25	Aegir_M25_B174	JJBMJCOG_3.region001	Terpene	Terpene generic	2.72	2
M25	Aegir_M25_B174	JJBMJCOG_70.region001	RiPP	RRE-containing	4.77	2
M25	Aegir_M25_B178	CKBFPJAI_1.region001	RiPP	RiPP-like	11.09	9
M25	Aegir_M25_B178	CKBFPJAI_8.region001	RiPP	RRE-containing	20.3	24
M25	Aegir_M25_B18	HGPHKBJF_38.region001	RiPP	RiPP-like	7.43	7
M25	Aegir_M25_B184	ECIDCPJL_15.region001	RiPP	RRE-containing	20.27	19
M25	Aegir_M25_B187	JGCCPAEM_7.region001	RiPP	RiPP-like	10.88	10
M25	Aegir_M25_B187	JGCCPAEM_109.region001	RiPP	RRE-containing	11.04	11
M25	Aegir_M25_B187	JGCCPAEM_70.region001	RiPP	RRE-containing	11.92	10
M25	Aegir_M25_B187	JGCCPAEM_77.region001	RiPP	RRE-containing	20.37	12
M25	Aegir_M25_B188	DCCNGCIG_108.region001	NRP	NRP generic	11.98	6
M25	Aegir_M25_B188	DCCNGCIG_19.region001	NRP	NRP generic	29.11	14
M25	Aegir_M25_B188	DCCNGCIG_25.region001	Hybrid	NRPS:T1PKS	28.92	15
M25	Aegir_M25_B188	DCCNGCIG_264.region001	NRP	NRP generic	11.49	3
M25	Aegir_M25_B188	DCCNGCIG_272.region001	Polyketide	T3PKS	30.46	19
M25	Aegir_M25_B188	DCCNGCIG_256.region001	NRP	NRP generic	15.01	7
M25	Aegir_M25_B189	LIIILLNF_352.region001	RiPP	RiPP-like	6.99	7
M25	Aegir_M25_B189	LIIILLNF_411.region001	Polyketide	T3PKS	4.05	4
M25	Aegir_M25_B190	PPGIJDNA_82.region001	RiPP	RiPP-like	10.38	15
M25	Aegir_M25_B190	PPGIJDNA_67.region001	Other	hserlactone	20.59	18
M25	Aegir_M25_B190	PPGIJDNA_144.region001	Terpene	Terpene generic	11.18	14
M25	Aegir_M25_B191	DOFINDKD_97.region001	Other	arylpolyene	14.11	13
M25	Aegir_M25_B191	DOFINDKD_55.region001	RiPP	redox-cofactor	8.58	9
M25	Aegir_M25_B191	DOFINDKD_24.region001	Terpene	Terpene generic	19.97	17
M25	Aegir_M25_B191	DOFINDKD_26.region001	Other	hserlactone	9.3	12
M25	Aegir_M25_B191	DOFINDKD_161.region001	RiPP	RiPP-like	5.82	7
M25	Aegir_M25_B193	OKNDCDBL_273.region001	Terpene	Terpene generic	3.42	3
M25	Aegir_M25_B193	OKNDCDBL_127.region001	RiPP	RiPP-like	10.86	14
M25	Aegir_M25_B193	OKNDCDBL_379.region001	Other	hserlactone	8.88	11
M25	Aegir_M25_B194	EFPMGGGC_145.region001	RiPP	RRE-containing	3.8	5
M25	Aegir_M25_B195	EJAAFDIG_104.region001	RiPP	RiPP-like	10.86	11
M25	Aegir_M25_B196	DNAEBAJA_236.region001	RiPP	RiPP-like	2.22	1
M25	Aegir_M25_B197	LAIPNIDF_293.region001	Other	arylpolyene	2.23	2
M25	Aegir_M25_B198	AFNHJEFG_24.region001	RiPP	RiPP-like	10.83	11
M25	Aegir_M25_B198	AFNHJEFG_35.region001	Hybrid	NRPS-like:RRE-containing	31.1	29
M25	Aegir_M25_B199	BNINIGFF_141.region001	Other	betalactone	21.05	14
M25	Aegir_M25_B199	BNINIGFF_83.region001	RiPP	RRE-containing	20.28	18
M25	Aegir_M25_B200	AAFKEBIM_2.region001	Hybrid	lassopeptide:RRE-containing	14.64	8
M25	Aegir_M25_B200	AAFKEBIM_35.region001	RiPP	RRE-containing	15.57	10
M25	Aegir_M25_B200	AAFKEBIM_50.region001	Terpene	Terpene generic	21.67	20
M25	Aegir_M25_B205	OJDELFPK_259.region001	RiPP	RiPP-like	2.04	3
M25	Aegir_M25_B205	OJDELFPK_120.region001	Terpene	Terpene generic	8.55	8
M25	Aegir_M25_B205	OJDELFPK_184.region001	RiPP	RiPP-like	7.23	5
M25	Aegir_M25_B205	OJDELFPK_32.region001	RiPP	ranthipeptide	4.41	6
M25	Aegir_M25_B209	HOJMOMBC_312.region001	NRP	NRPS-like	23.22	23
M25	Aegir_M25_B209	HOJMOMBC_58.region001	RiPP	RiPP-like	6.56	8
M25	Aegir_M25_B209	HOJMOMBC_3.region001	RiPP	RRE-containing	2.16	4
M25	Aegir_M25_B21	MCNDNIFN_143.region001	RiPP	RRE-containing	13.88	13
M25	Aegir_M25_B21	MCNDNIFN_87.region001	RiPP	RRE-containing	3.18	4
M25	Aegir_M25_B212	BEDLJFEI_42.region001	RiPP	RiPP-like	6.8	9
M25	Aegir_M25_B212	BEDLJFEI_51.region001	Other	hserlactone	13.15	11
M25	Aegir_M25_B213	IPAOHKCN_127.region001	Other	arylpolyene	40.15	38
M25	Aegir_M25_B213	IPAOHKCN_108.region001	NRP	NRPS-like	19.08	17
M25	Aegir_M25_B213	IPAOHKCN_53.region001	Terpene	Terpene generic	7.07	7
M25	Aegir_M25_B213	IPAOHKCN_122.region001	NRP	NRPS-like	9.38	9
M25	Aegir_M25_B214	MAFDNHBJ_199.region001	Other	arylpolyene	6.59	5
M25	Aegir_M25_B214	MAFDNHBJ_205.region001	RiPP	RiPP-like	3.83	4
M25	Aegir_M25_B215	DBLJEKIA_31.region001	Terpene	Terpene generic	10.48	9
M25	Aegir_M25_B215	DBLJEKIA_114.region001	RiPP	sactipeptide	14.74	12
M25	Aegir_M25_B215	DBLJEKIA_312.region001	RiPP	RRE-containing	7.64	9
M25	Aegir_M25_B216	NDPGLPLK_23.region001	RiPP	RRE-containing	20.26	22
M25	Aegir_M25_B216	NDPGLPLK_30.region001	Other	betalactone	32.55	25
M25	Aegir_M25_B216	NDPGLPLK_31.region001	RiPP	RRE-containing	20.33	18
M25	Aegir_M25_B216	NDPGLPLK_10.region001	Terpene	Terpene generic	23	23
M25	Aegir_M25_B216	NDPGLPLK_29.region001	RiPP	redox-cofactor	22.09	22
M25	Aegir_M25_B218	OFOBCBEG_11.region001	RiPP	RiPP-like	11.07	13
M25	Aegir_M25_B221	HDNFIEHE_2.region001	RiPP	RiPP-like	8.1	6
M25	Aegir_M25_B221	HDNFIEHE_42.region001	RiPP	RiPP-like	11.72	10
M25	Aegir_M25_B222	IJDCOELN_61.region001	RiPP	RRE-containing	3.64	5
M25	Aegir_M25_B222	IJDCOELN_81.region001	RiPP	RiPP-like	8.47	11
M25	Aegir_M25_B224	GOPPLFKP_39.region001	RiPP	RiPP-like	11.75	8
M25	Aegir_M25_B224	GOPPLFKP_69.region001	RiPP	RiPP-like	11.76	9
M25	Aegir_M25_B224	GOPPLFKP_72.region001	Other	acyl_amino_acids	4.63	2
M25	Aegir_M25_B225	IPPMKPGL_94.region001	Other	betalactone	20.34	21
M25	Aegir_M25_B225	IPPMKPGL_19.region001	RiPP	redox-cofactor	8.88	10
M25	Aegir_M25_B225	IPPMKPGL_60.region001	Terpene	Terpene generic	7.29	9
M25	Aegir_M25_B225	IPPMKPGL_80.region001	Terpene	Terpene generic	12.26	14
M25	Aegir_M25_B225	IPPMKPGL_24.region001	RiPP	RiPP-like	10.34	11
M25	Aegir_M25_B226	CMOMDCKF_28.region001	Terpene	Terpene generic	19.78	15
M25	Aegir_M25_B228	MMMPPMMI_72.region001	RiPP	RiPP-like	2.1	3
M25	Aegir_M25_B229	NDFDGGDH_119.region001	RiPP	RiPP-like	10.43	9
M25	Aegir_M25_B229	NDFDGGDH_7.region001	Hybrid	NRPS:T1PKS	103.45	36
M25	Aegir_M25_B229	NDFDGGDH_61.region001	Terpene	Terpene generic	16.74	10
M25	Aegir_M25_B230	KCIFPCKP_76.region001	Other	hydrogen-cyanide	10.09	9
M25	Aegir_M25_B231	GCMBIIMM_62.region001	RiPP	RiPP-like	11.79	10
M25	Aegir_M25_B231	GCMBIIMM_7.region001	Other	acyl_amino_acids	33.76	33
M25	Aegir_M25_B231	GCMBIIMM_9.region001	RiPP	RiPP-like	7.04	7
M25	Aegir_M25_B232	BDOMIJBA_148.region001	RiPP	RRE-containing	7.51	8
M25	Aegir_M25_B232	BDOMIJBA_152.region001	RiPP	RiPP-like	10.87	9
M25	Aegir_M25_B232	BDOMIJBA_171.region001	Terpene	Terpene generic	16.38	14
M25	Aegir_M25_B237	KDPMIDBH_120.region001	Other	hydrogen-cyanide	6.2	8
M25	Aegir_M25_B237	KDPMIDBH_245.region001	RiPP	RiPP-like	7.88	8
M25	Aegir_M25_B238	LGMPKPMI_11.region001	RiPP	RiPP-like	10.85	11
M25	Aegir_M25_B238	LGMPKPMI_3.region001	RiPP	RiPP-like	10.95	12
M25	Aegir_M25_B239	IEDIOMHP_114.region001	NRP	NRPS-like	27.72	21
M25	Aegir_M25_B239	IEDIOMHP_43.region001	Polyketide	T3PKS	31.18	28
M25	Aegir_M25_B239	IEDIOMHP_46.region001	Polyketide	T1PKS	23.04	14
M25	Aegir_M25_B239	IEDIOMHP_55.region001	Polyketide	T1PKS	46.4	29
M25	Aegir_M25_B239	IEDIOMHP_5.region001	Polyketide	T1PKS	50.99	36
M25	Aegir_M25_B239	IEDIOMHP_8.region001	Polyketide	hglE-KS	30.29	14
M25	Aegir_M25_B239	IEDIOMHP_9.region001	Other	betalactone	33.08	24
M25	Aegir_M25_B24	NNPGLMIM_126.region001	RiPP	RiPP-like	6.63	8
M25	Aegir_M25_B24	NNPGLMIM_112.region001	Terpene	Terpene generic	5.32	4
M25	Aegir_M25_B24	NNPGLMIM_123.region001	Terpene	Terpene generic	11.15	8
M25	Aegir_M25_B24	NNPGLMIM_36.region001	Other	hydrogen-cyanide	12.8	12
M25	Aegir_M25_B24	NNPGLMIM_23.region001	NRP	NRP generic	43.82	26
M25	Aegir_M25_B24	NNPGLMIM_56.region001	RiPP	RiPP-like	10.85	9
M25	Aegir_M25_B24	NNPGLMIM_169.region001	RiPP	RiPP-like	11.61	10
M25	Aegir_M25_B24	NNPGLMIM_96.region001	Other	arylpolyene	14.72	13
M25	Aegir_M25_B24	NNPGLMIM_30.region001	RiPP	redox-cofactor	18.73	18
M25	Aegir_M25_B241	IDKIGBJD_193.region001	Hybrid	arylpolyene:resorcinol	14.37	16
M25	Aegir_M25_B241	IDKIGBJD_98.region001	RiPP	RRE-containing	16.08	15
M25	Aegir_M25_B241	IDKIGBJD_169.region001	Other	arylpolyene	2.66	3
M25	Aegir_M25_B242	MNNKNLIN_111.region001	RiPP	RRE-containing	20.24	15
M25	Aegir_M25_B245	MJIPPEME_8.region001	NRP	NRPS-like	29.85	29
M25	Aegir_M25_B245	MJIPPEME_47.region001	RiPP	RiPP-like	10.66	14
M25	Aegir_M25_B245	MJIPPEME_19.region001	RiPP	RiPP-like	10.84	11
M25	Aegir_M25_B247	HDGJHJCB_152.region001	Other	arylpolyene	17.61	20
M25	Aegir_M25_B247	HDGJHJCB_184.region001	Other	arylpolyene	9.06	8
M25	Aegir_M25_B247	HDGJHJCB_186.region001	RiPP	RiPP-like	11.72	7
M25	Aegir_M25_B247	HDGJHJCB_187.region001	RiPP	RiPP-like	7.68	5
M25	Aegir_M25_B247	HDGJHJCB_198.region001	Polyketide	T1PKS	2.62	1
M25	Aegir_M25_B247	HDGJHJCB_27.region001	Other	arylpolyene	5.83	5
M25	Aegir_M25_B247	HDGJHJCB_53.region001	Terpene	Terpene generic	7.75	7
M25	Aegir_M25_B247	HDGJHJCB_87.region001	Other	arylpolyene	4.05	6
M25	Aegir_M25_B249	APPKEMID_55.region001	Terpene	Terpene generic	20.84	23
M25	Aegir_M25_B25	DLIGJPKI_19.region001	RiPP	RRE-containing	20.28	23
M25	Aegir_M25_B25	DLIGJPKI_32.region001	RiPP	lassopeptide	20.18	19
M25	Aegir_M25_B251	MJNBCPKI_63.region001	RiPP	RiPP-like	4.46	4
M25	Aegir_M25_B252	KLFLDMCD_174.region001	Hybrid	lassopeptide:RRE-containing	11.64	12
M25	Aegir_M25_B252	KLFLDMCD_176.region001	RiPP	RiPP-like	6.87	8
M25	Aegir_M25_B252	KLFLDMCD_203.region001	Other	betalactone	2.83	2
M25	Aegir_M25_B254	DFDIHNMG_349.region001	Polyketide	hglE-KS	5.75	3
M25	Aegir_M25_B254	DFDIHNMG_372.region001	Hybrid	lassopeptide:RRE-containing	11.01	10
M25	Aegir_M25_B254	DFDIHNMG_541.region001	RiPP	RRE-containing	9.02	7
M25	Aegir_M25_B255	GLPOFOGI_13.region001	Polyketide	T1PKS	49.61	29
M25	Aegir_M25_B255	GLPOFOGI_25.region001	RiPP	RiPP-like	10.87	12
M25	Aegir_M25_B255	GLPOFOGI_41.region001	Polyketide	hglE-KS	54.1	41
M25	Aegir_M25_B255	GLPOFOGI_69.region001	Polyketide	T3PKS	36.38	30
M25	Aegir_M25_B255	GLPOFOGI_83.region001	RiPP	RiPP-like	11.19	14
M25	Aegir_M25_B255	GLPOFOGI_65.region001	Polyketide	T3PKS	18.11	14
M25	Aegir_M25_B255	GLPOFOGI_105.region001	Other	betalactone	32.99	32
M25	Aegir_M25_B255	GLPOFOGI_25.region002	NRP	NRPS-like	35.95	28
M25	Aegir_M25_B26	MENBPKOE_56.region001	RiPP	RiPP-like	9.2	11
M25	Aegir_M25_B26	MENBPKOE_68.region001	RiPP	RRE-containing	17.02	13
M25	Aegir_M25_B27	CEDJFLIO_171.region001	RiPP	ranthipeptide	8.61	12
M25	Aegir_M25_B29	LCLGOFJB_213.region001	RiPP	RRE-containing	10.82	10
M25	Aegir_M25_B32	EPFHNGPE_33.region001	Other	arylpolyene	41.15	35
M25	Aegir_M25_B33	GMCODDEA_19.region001	RiPP	RRE-containing	20.4	13
M25	Aegir_M25_B34	FHCMHAMK_203.region001	Hybrid	PUFA:T1PKS	22.85	11
M25	Aegir_M25_B34	FHCMHAMK_510.region001	Terpene	Terpene generic	15.37	12
M25	Aegir_M25_B34	FHCMHAMK_391.region001	RiPP	RRE-containing	11.01	8
M25	Aegir_M25_B35	MMCIJMOE_28.region001	RiPP	redox-cofactor	3.33	5
M25	Aegir_M25_B35	MMCIJMOE_60.region001	NRP	NRPS-like	3.89	2
M25	Aegir_M25_B35	MMCIJMOE_79.region001	RiPP	RiPP-like	6.76	8
M25	Aegir_M25_B35	MMCIJMOE_138.region001	Terpene	Terpene generic	10.38	11
M25	Aegir_M25_B36	KIPJBGOE_56.region001	RiPP	RRE-containing	19.81	18
M25	Aegir_M25_B37	ALJMBEPD_38.region001	Other	nucleoside	20.93	14
M25	Aegir_M25_B38	KCLEFMIG_17.region001	Terpene	Terpene generic	22.03	17
M25	Aegir_M25_B38	KCLEFMIG_18.region001	Other	arylpolyene	41.23	36
M25	Aegir_M25_B38	KCLEFMIG_18.region002	Other	arylpolyene	42.25	32
M25	Aegir_M25_B38	KCLEFMIG_28.region001	NRP	NRPS-like	27.73	23
M25	Aegir_M25_B38	KCLEFMIG_29.region001	RiPP	RiPP-like	8.17	5
M25	Aegir_M25_B38	KCLEFMIG_34.region001	Hybrid	arylpolyene:resorcinol	48.33	44
M25	Aegir_M25_B4	LJDOBCNF_117.region001	Terpene	Terpene generic	8.66	12
M25	Aegir_M25_B40	EJKDLJJF_21.region001	Other	arylpolyene	5.18	5
M25	Aegir_M25_B40	EJKDLJJF_58.region001	Other	resorcinol	3.98	5
M25	Aegir_M25_B40	EJKDLJJF_202.region001	Other	arylpolyene	3.36	5
M25	Aegir_M25_B46	IIHGGKOK_68.region001	Terpene	Terpene generic	21.02	12
M25	Aegir_M25_B46	IIHGGKOK_97.region001	Terpene	Terpene generic	21.52	19
M25	Aegir_M25_B46	IIHGGKOK_3.region001	NRP	NRPS-like	43.4	36
M25	Aegir_M25_B47	LPFNNGLO_158.region001	Terpene	Terpene generic	21.8	17
M25	Aegir_M25_B48	EOLDCPEM_116.region001	RiPP	RRE-containing	6.89	5
M25	Aegir_M25_B5	PMJAACFD_41.region001	Terpene	Terpene generic	24.36	18
M25	Aegir_M25_B5	PMJAACFD_49.region001	Polyketide	T3PKS	41.13	43
M25	Aegir_M25_B50	ADKCALKC_20.region001	Other	hserlactone	16.18	19
M25	Aegir_M25_B50	ADKCALKC_31.region001	RiPP	RiPP-like	9.57	9
M25	Aegir_M25_B50	ADKCALKC_51.region001	Polyketide	T1PKS	18.28	10
M25	Aegir_M25_B50	ADKCALKC_6.region001	RiPP	RRE-containing	6.92	6
M25	Aegir_M25_B51	JAIACPEE_13.region001	Hybrid	lassopeptide:RRE-containing	27.4	25
M25	Aegir_M25_B54	NMEKPIAN_589.region001	RiPP	RRE-containing	9.82	7
M25	Aegir_M25_B54	NMEKPIAN_575.region001	Terpene	Terpene generic	9.86	8
M25	Aegir_M25_B54	NMEKPIAN_397.region001	RiPP	RiPP-like	6.44	7
M25	Aegir_M25_B54	NMEKPIAN_308.region001	RiPP	RiPP-like	2.82	5
M25	Aegir_M25_B55	CMAAFGAB_32.region001	NRP	NRPS-like	33.61	35
M25	Aegir_M25_B55	CMAAFGAB_35.region001	RiPP	RiPP-like	8.36	11
M25	Aegir_M25_B55	CMAAFGAB_51.region001	Terpene	Terpene generic	15.83	14
M25	Aegir_M25_B56	NICDANKK_39.region001	NRP	NRP generic	7.48	1
M25	Aegir_M25_B56	NICDANKK_56.region001	Hybrid	NRPS:T1PKS	25.45	4
M25	Aegir_M25_B56	NICDANKK_66.region001	NRP	NRP generic	6.27	2
M25	Aegir_M25_B56	NICDANKK_55.region001	NRP	NRP generic	23.94	4
M25	Aegir_M25_B56	NICDANKK_1.region001	NRP	NRP generic	30.56	15
M25	Aegir_M25_B56	NICDANKK_51.region001	RiPP	RRE-containing	20.37	20
M25	Aegir_M25_B56	NICDANKK_73.region001	Terpene	Terpene generic	17.94	9
M25	Aegir_M25_B57	MFBIBGIB_179.region001	RiPP	RRE-containing	6.35	6
M25	Aegir_M25_B58	EKAMJCNM_108.region001	Other	hserlactone	12.79	10
M25	Aegir_M25_B58	EKAMJCNM_204.region001	Terpene	Terpene generic	18.6	20
M25	Aegir_M25_B58	EKAMJCNM_173.region001	Other	hserlactone	5.3	6
M25	Aegir_M25_B6	HLLDGPEO_16.region001	RiPP	RRE-containing	9.36	8
M25	Aegir_M25_B6	HLLDGPEO_60.region001	RiPP	thiopeptide	24.4	24
M25	Aegir_M25_B62	PHHBDHMB_81.region001	RiPP	ranthipeptide	21.27	21
M25	Aegir_M25_B63	ECEBLJCB_19.region001	RiPP	RiPP-like	5.19	7
M25	Aegir_M25_B64	NPKIOIOJ_12.region001	NRP	NRPS-like	11.85	12
M25	Aegir_M25_B64	NPKIOIOJ_34.region001	RiPP	RRE-containing	3.27	3
M25	Aegir_M25_B65	AJPDMLKK_206.region001	RiPP	redox-cofactor	3.88	4
M25	Aegir_M25_B65	AJPDMLKK_334.region001	RiPP	RiPP-like	2.52	3
M25	Aegir_M25_B65	AJPDMLKK_83.region001	Terpene	Terpene generic	9.76	6
M25	Aegir_M25_B65	AJPDMLKK_341.region001	Polyketide	T1PKS	9.97	2
M25	Aegir_M25_B66	JDPKAENK_110.region001	Other	arylpolyene	16.45	14
M25	Aegir_M25_B67	FIJJPHGJ_218.region001	RiPP	RiPP-like	3.16	4
M25	Aegir_M25_B69	IAAOHMCL_14.region001	RiPP	RiPP-like	11.09	12
M25	Aegir_M25_B69	IAAOHMCL_9.region001	RiPP	RRE-containing	20.27	21
M25	Aegir_M25_B7	ICOMKHEL_87.region001	RiPP	RiPP-like	5.99	4
M25	Aegir_M25_B7	ICOMKHEL_90.region001	RiPP	RRE-containing	20.38	13
M25	Aegir_M25_B70	AMOJAIOH_40.region001	Hybrid	NRPS:T1PKS	36.42	13
M25	Aegir_M25_B70	AMOJAIOH_8.region001	RiPP	RRE-containing	10.48	10
M25	Aegir_M25_B73	FLFHMAHC_121.region001	RiPP	RiPP-like	8.13	7
M25	Aegir_M25_B73	FLFHMAHC_265.region001	RiPP	lanthipeptide	4.77	4
M25	Aegir_M25_B73	FLFHMAHC_117.region001	Other	betalactone	8.81	7
M25	Aegir_M25_B74	PAGHHCMK_117.region001	RiPP	RiPP-like	5.39	5
M25	Aegir_M25_B74	PAGHHCMK_288.region001	RiPP	RRE-containing	3.86	8
M25	Aegir_M25_B76	MONNEOAI_35.region001	RiPP	RiPP-like	9.26	5
M25	Aegir_M25_B77	IHGNANKF_24.region001	RiPP	RiPP-like	6.85	7
M25	Aegir_M25_B77	IHGNANKF_46.region001	RiPP	RiPP-like	10.81	9
M25	Aegir_M25_B78	EAGGALCG_30.region001	RiPP	ranthipeptide	26	22
M25	Aegir_M25_B78	EAGGALCG_39.region001	RiPP	RRE-containing	20.3	23
M25	Aegir_M25_B78	EAGGALCG_40.region001	RiPP	RRE-containing	18.31	18
M25	Aegir_M25_B78	EAGGALCG_43.region001	RiPP	RRE-containing	20.31	11
M25	Aegir_M25_B78	EAGGALCG_44.region001	Terpene	Terpene generic	15.68	12
M25	Aegir_M25_B78	EAGGALCG_7.region001	Hybrid	arylpolyene:Terpene	41.26	35
M25	Aegir_M25_B79	DGAMHEBP_111.region001	NRP	NRPS-like	42.66	33
M25	Aegir_M25_B79	DGAMHEBP_29.region001	RiPP	RRE-containing	11.22	7
M25	Aegir_M25_B8	HKMAABAO_195.region001	Terpene	Terpene generic	17.41	16
M25	Aegir_M25_B8	HKMAABAO_244.region001	RiPP	RiPP-like	8.08	8
M25	Aegir_M25_B81	NAMCIKMA_46.region001	RiPP	RRE-containing	20.24	21
M25	Aegir_M25_B81	NAMCIKMA_27.region001	RiPP	RRE-containing	20.26	16
M25	Aegir_M25_B81	NAMCIKMA_16.region001	RiPP	RRE-containing	20.27	25
M25	Aegir_M25_B81	NAMCIKMA_3.region001	RiPP	RRE-containing	20.26	20
M25	Aegir_M25_B82	JBHLLBPA_36.region001	Other	betalactone	19.64	19
M25	Aegir_M25_B83	MENCFBOC_108.region001	RiPP	RRE-containing	12.42	11
M25	Aegir_M25_B83	MENCFBOC_252.region001	Terpene	Terpene generic	6.44	3
M25	Aegir_M25_B83	MENCFBOC_475.region001	RiPP	RRE-containing	9.98	8
M25	Aegir_M25_B83	MENCFBOC_561.region001	Other	phosphonate	4.52	4
M25	Aegir_M25_B84	HDCNPNCJ_12.region001	Terpene	Terpene generic	16.38	14
M25	Aegir_M25_B84	HDCNPNCJ_14.region001	Other	betalactone	32.55	29
M25	Aegir_M25_B84	HDCNPNCJ_4.region001	Terpene	Terpene generic	14.85	13
M25	Aegir_M25_B85	FPNGPMKE_236.region001	RiPP	RRE-containing	2.05	3
M25	Aegir_M25_B87	DKBJNFLL_109.region001	Other	arylpolyene	26.84	25
M25	Aegir_M25_B87	DKBJNFLL_138.region001	RiPP	RiPP-like	7.52	7
M25	Aegir_M25_B87	DKBJNFLL_141.region001	Polyketide	hglE-KS	12.39	6
M25	Aegir_M25_B87	DKBJNFLL_154.region001	Terpene	Terpene generic	20.94	17
M25	Aegir_M25_B87	DKBJNFLL_171.region001	Other	arylpolyene	28.56	27
M25	Aegir_M25_B87	DKBJNFLL_178.region001	Polyketide	T3PKS	24.23	22
M25	Aegir_M25_B87	DKBJNFLL_219.region001	Terpene	Terpene generic	27.65	18
M25	Aegir_M25_B87	DKBJNFLL_22.region001	Terpene	Terpene generic	21.13	17
M25	Aegir_M25_B88	PNKOKCJG_2.region001	RiPP	RiPP-like	10.2	11
M25	Aegir_M25_B9	CMHNOBHP_178.region001	NRP	NRPS-like	2.38	2
M25	Aegir_M25_B9	CMHNOBHP_237.region001	RiPP	RiPP-like	5.1	6
M25	Aegir_M25_B90	PLEPLBPC_24.region001	NRP	NRPS-like	36.61	33
M25	Aegir_M25_B90	PLEPLBPC_10.region001	RiPP	RiPP-like	10.35	9
M25	Aegir_M25_B91	CMMDPEPH_44.region001	RiPP	RRE-containing	6.98	6
M25	Aegir_M25_B91	CMMDPEPH_48.region001	RiPP	RRE-containing	20.31	19
M25	Aegir_M25_B91	CMMDPEPH_66.region001	RiPP	RiPP-like	6.83	6
M25	Aegir_M25_B93	CNKJHFHF_10.region001	Polyketide	T3PKS	36.3	37
M25	Aegir_M25_B93	CNKJHFHF_72.region001	NRP	NRPS-like	37.17	36
M25	Aegir_M25_B93	CNKJHFHF_8.region001	Hybrid	RiPP-redox-cofactor:thioamitides:thiopeptide	28.58	30
M25	Aegir_M25_B95	DNIJFPOO_10.region001	RiPP	RiPP-like	10.85	11
M25	Aegir_M25_B95	DNIJFPOO_34.region001	Other	betalactone	17.57	14
M25	Aegir_M25_B95	DNIJFPOO_63.region001	RiPP	RiPP-like	11.74	7
M25	Aegir_M25_B96	KBGDCNMJ_52.region001	Other	betalactone	27.87	27
M25	Aegir_M25_B98	MHGIKJMM_48.region001	RiPP	RiPP-like	10.84	7
M25	Aegir_M25_B98	MHGIKJMM_76.region001	Other	hserlactone	15.34	13
M25	Aegir_M25_B99	FLKMLDCN_17.region001	Other	acyl_amino_acids	7.83	7
M26	Aegir_M26_B11	DLNEDAAN_222.region001	RiPP	RiPP-like	10.85	12
M26	Aegir_M26_B11	DLNEDAAN_321.region001	RiPP	RRE-containing	8.47	7
M26	Aegir_M26_B11	DLNEDAAN_311.region001	Terpene	Terpene generic	22.25	18
M26	Aegir_M26_B11	DLNEDAAN_406.region001	RiPP	redox-cofactor	9.28	12
M26	Aegir_M26_B11	DLNEDAAN_159.region001	Other	hserlactone	6.61	7
M26	Aegir_M26_B11	DLNEDAAN_351.region001	Other	arylpolyene	7.9	9
M26	Aegir_M26_B12	PDFOFEJH_58.region001	RiPP	thiopeptide	15.13	15
M26	Aegir_M26_B12	PDFOFEJH_68.region001	RiPP	RRE-containing	9.01	11
M26	Aegir_M26_B13	NBAFEPBD_33.region001	RiPP	RRE-containing	7.72	8
M26	Aegir_M26_B14	GCNNIFNC_205.region001	RiPP	RiPP-like	6.62	8
M26	Aegir_M26_B17	PKFAEHIF_155.region001	Other	arylpolyene	7.7	8
M26	Aegir_M26_B18	JCAMHBNC_17.region001	NRP	NRPS-like	32.26	32
M26	Aegir_M26_B18	JCAMHBNC_24.region001	RiPP	RiPP-like	6.1	7
M26	Aegir_M26_B19	HDIEMOMA_43.region001	RiPP	RiPP-like	10.41	9
M26	Aegir_M26_B19	HDIEMOMA_52.region001	RiPP	RRE-containing	20.23	23
M26	Aegir_M26_B2	PCKKCEMC_159.region001	RiPP	RiPP-like	5.74	6
M26	Aegir_M26_B21	DBAKDGDJ_11.region001	Other	arylpolyene	2.83	3
M26	Aegir_M26_B21	DBAKDGDJ_156.region001	RiPP	RiPP-like	3.49	1
M26	Aegir_M26_B22	IIPPKNAG_164.region001	Polyketide	T3PKS	14.46	13
M26	Aegir_M26_B22	IIPPKNAG_28.region001	Other	ectoine	7.58	5
M26	Aegir_M26_B22	IIPPKNAG_33.region001	RiPP	RiPP-like	4.33	3
M26	Aegir_M26_B25	LLGPIOIN_20.region001	RiPP	RiPP-like	10.84	13
M26	Aegir_M26_B26	IFPDOPNG_15.region001	Other	betalactone	18.28	15
M26	Aegir_M26_B26	IFPDOPNG_18.region001	RiPP	RiPP-like	10.89	13
M26	Aegir_M26_B26	IFPDOPNG_41.region001	Other	hydrogen-cyanide	12.95	13
M26	Aegir_M26_B26	IFPDOPNG_47.region001	Other	siderophore	29.91	26
M26	Aegir_M26_B26	IFPDOPNG_51.region001	Terpene	Terpene generic	20.89	14
M26	Aegir_M26_B26	IFPDOPNG_51.region002	Other	arylpolyene	41.25	43
M26	Aegir_M26_B26	IFPDOPNG_6.region001	Polyketide	T1PKS	39.47	26
M26	Aegir_M26_B26	IFPDOPNG_6.region002	RiPP	redox-cofactor	22.4	13
M26	Aegir_M26_B27	DNALNJHC_153.region001	Terpene	Terpene generic	12.21	14
M26	Aegir_M26_B27	DNALNJHC_173.region001	Terpene	Terpene generic	2.91	4
M26	Aegir_M26_B27	DNALNJHC_46.region001	RiPP	RiPP-like	3.51	5
M26	Aegir_M26_B27	DNALNJHC_141.region001	RiPP	ranthipeptide	5.18	6
M26	Aegir_M26_B28	FFGAEJMC_80.region001	RiPP	RRE-containing	9.03	8
M26	Aegir_M26_B29	IKNLBCIC_9.region001	RiPP	thiopeptide	38.17	33
M26	Aegir_M26_B3	IODIEGBO_93.region001	Other	resorcinol	6.49	5
M26	Aegir_M26_B31	NLIECILF_1.region001	RiPP	RiPP-like	9.47	7
M26	Aegir_M26_B32	KKIHGFKI_59.region001	RiPP	RRE-containing	11.22	12
M26	Aegir_M26_B32	KKIHGFKI_84.region001	NRP	NRPS-like	8.23	8
M26	Aegir_M26_B33	MJCJCPAN_204.region001	RiPP	RRE-containing	3.54	4
M26	Aegir_M26_B35	ICMPHAAN_1.region001	Other	betalactone	25.52	30
M26	Aegir_M26_B37	ANFLNNNB_40.region001	RiPP	RiPP-like	11.71	9
M26	Aegir_M26_B37	ANFLNNNB_38.region001	Polyketide	T3PKS	35.31	35
M26	Aegir_M26_B40	EFHMKIBB_190.region001	RiPP	RRE-containing	9.01	9
M26	Aegir_M26_B42	LIECIJKJ_120.region001	RiPP	RiPP-like	2.98	3
M26	Aegir_M26_B46	NJMACCPO_14.region001	RiPP	RiPP-like	6.93	6
M26	Aegir_M26_B47	JFIMMOHC_85.region001	RiPP	RiPP-like	4.96	4
M26	Aegir_M26_B47	JFIMMOHC_129.region001	Other	hserlactone	13.4	15
M26	Aegir_M26_B5	BDHJOFGG_132.region001	RiPP	RRE-containing	18.81	19
M26	Aegir_M26_B6	CBOPLNHK_55.region001	RiPP	RRE-containing	2.58	6
M26	Aegir_M26_B8	JGFOAEIO_1.region001	RiPP	RRE-containing	16.05	15
M36	Aegir_M36_B1	KLDNEJDF_28.region001	RiPP	RiPP-like	10.88	12
M36	Aegir_M36_B1	KLDNEJDF_34.region001	Other	hserlactone	20.68	23
M36	Aegir_M36_B1	KLDNEJDF_26.region001	RiPP	redox-cofactor	22.09	24
M36	Aegir_M36_B10	DFGJMDKL_248.region001	Other	hydrogen-cyanide	7.03	5
M36	Aegir_M36_B10	DFGJMDKL_346.region001	RiPP	RRE-containing	4.98	3
M36	Aegir_M36_B11	IHMCLFFE_526.region001	RiPP	ranthipeptide	2.37	3
M36	Aegir_M36_B12	GOFJAIOF_85.region001	RiPP	RiPP-like	11.51	9
M36	Aegir_M36_B12	GOFJAIOF_195.region001	Other	ectoine	10.39	6
M36	Aegir_M36_B12	GOFJAIOF_12.region001	RiPP	redox-cofactor	5.71	6
M36	Aegir_M36_B13	IKNLIDBL_119.region001	RiPP	RiPP-like	8.47	10
M36	Aegir_M36_B13	IKNLIDBL_3.region001	Polyketide	T1PKS	33.23	22
M36	Aegir_M36_B13	IKNLIDBL_46.region001	RiPP	RiPP-like	9.72	13
M36	Aegir_M36_B13	IKNLIDBL_88.region001	RiPP	RiPP-like	7.36	11
M36	Aegir_M36_B15	LAPKCFCO_118.region001	RiPP	RRE-containing	12.71	10
M36	Aegir_M36_B15	LAPKCFCO_24.region001	Other	hydrogen-cyanide	13.23	12
M36	Aegir_M36_B15	LAPKCFCO_69.region001	RiPP	ranthipeptide	13.31	9
M36	Aegir_M36_B17	PFPLAJGA_35.region001	Other	resorcinol	41.15	36
M36	Aegir_M36_B17	PFPLAJGA_24.region001	RiPP	redox-cofactor	22.2	24
M36	Aegir_M36_B17	PFPLAJGA_30.region001	Terpene	Terpene generic	11.77	13
M36	Aegir_M36_B17	PFPLAJGA_84.region001	RiPP	RiPP-like	7.04	4
M36	Aegir_M36_B17	PFPLAJGA_98.region001	Terpene	Terpene generic	20.81	19
M36	Aegir_M36_B19	DMJMMPGP_85.region001	Hybrid	arylpolyene:resorcinol	44.88	46
M36	Aegir_M36_B2	NDAJAKLO_137.region001	NRP	NRP generic	15.09	6
M36	Aegir_M36_B2	NDAJAKLO_144.region001	Polyketide	T1PKS	16.47	5
M36	Aegir_M36_B2	NDAJAKLO_163.region001	Other	hydrogen-cyanide	12.84	12
M36	Aegir_M36_B2	NDAJAKLO_217.region001	RiPP	RiPP-like	10.44	10
M36	Aegir_M36_B2	NDAJAKLO_47.region001	Polyketide	hglE-KS	22.04	13
M36	Aegir_M36_B2	NDAJAKLO_97.region001	Polyketide	hglE-KS	6.73	2
M36	Aegir_M36_B2	NDAJAKLO_9.region001	Other	betalactone	32.35	25
M36	Aegir_M36_B2	NDAJAKLO_174.region001	Other	betalactone	15.69	14
M36	Aegir_M36_B20	MGLIJNGM_128.region001	RiPP	RiPP-like	4.16	3
M36	Aegir_M36_B20	MGLIJNGM_5.region001	RiPP	RRE-containing	12.24	18
M36	Aegir_M36_B21	KFOBHDBC_645.region001	RiPP	sactipeptide	10.51	6
M36	Aegir_M36_B21	KFOBHDBC_426.region001	Terpene	Terpene generic	11.74	9
M36	Aegir_M36_B23	KFHHGAEL_190.region001	Terpene	Terpene generic	9.79	11
M36	Aegir_M36_B23	KFHHGAEL_85.region001	RiPP	RiPP-like	8.29	8
M36	Aegir_M36_B23	KFHHGAEL_205.region001	RiPP	RiPP-like	6.92	9
M36	Aegir_M36_B23	KFHHGAEL_187.region001	Other	hserlactone	14.85	14
M36	Aegir_M36_B24	DHGLLEPI_55.region001	Other	arylpolyene	17.58	16
M36	Aegir_M36_B24	DHGLLEPI_171.region001	Hybrid	arylpolyene:resorcinol	62.04	57
M36	Aegir_M36_B26	GAOBNHDM_388.region001	Other	arylpolyene	2.9	3
M36	Aegir_M36_B26	GAOBNHDM_142.region001	Other	arylpolyene	2.18	2
M36	Aegir_M36_B28	POOKNHCI_102.region001	Terpene	Terpene generic	26.52	16
M36	Aegir_M36_B28	POOKNHCI_264.region001	Polyketide	HR-T2PKS	11.7	11
M36	Aegir_M36_B28	POOKNHCI_16.region001	Other	arylpolyene	49.61	46
M36	Aegir_M36_B28	POOKNHCI_50.region001	Polyketide	hglE-KS	48.71	31
M36	Aegir_M36_B28	POOKNHCI_226.region001	RiPP	RiPP-like	8.29	6
M36	Aegir_M36_B28	POOKNHCI_182.region001	Polyketide	T3PKS	35.65	29
M36	Aegir_M36_B3	IJGCPAEO_174.region001	Other	arylpolyene	5.42	7
M36	Aegir_M36_B3	IJGCPAEO_33.region001	Other	resorcinol	4.19	4
M36	Aegir_M36_B3	IJGCPAEO_432.region001	RiPP	RRE-containing	3.2	2
M36	Aegir_M36_B3	IJGCPAEO_63.region001	Other	arylpolyene	5.73	6
M36	Aegir_M36_B3	IJGCPAEO_66.region001	Other	arylpolyene	14.79	14
M36	Aegir_M36_B33	HDDLGHFE_4.region001	Terpene	Terpene generic	6.71	6
M36	Aegir_M36_B33	HDDLGHFE_85.region001	RiPP	RiPP-like	10.83	13
M36	Aegir_M36_B33	HDDLGHFE_7.region001	RiPP	thiopeptide	29.02	29
M36	Aegir_M36_B33	HDDLGHFE_17.region001	Other	hserlactone	15.6	13
M36	Aegir_M36_B34	CHHKDDGB_15.region001	Polyketide	hglE-KS	54.1	41
M36	Aegir_M36_B34	CHHKDDGB_23.region001	Other	betalactone	32.99	32
M36	Aegir_M36_B34	CHHKDDGB_24.region001	Polyketide	T1PKS	49.61	29
M36	Aegir_M36_B34	CHHKDDGB_45.region001	RiPP	RiPP-like	10.87	12
M36	Aegir_M36_B34	CHHKDDGB_45.region002	NRP	NRPS-like	44.68	38
M36	Aegir_M36_B34	CHHKDDGB_67.region001	Polyketide	T3PKS	20.95	18
M36	Aegir_M36_B34	CHHKDDGB_6.region001	RiPP	RiPP-like	11.19	14
M36	Aegir_M36_B34	CHHKDDGB_8.region001	Polyketide	T3PKS	18.05	16
M36	Aegir_M36_B35	APLIPKFB_178.region001	RiPP	RRE-containing	15.24	16
M36	Aegir_M36_B35	APLIPKFB_17.region001	Terpene	Terpene generic	5	4
M36	Aegir_M36_B35	APLIPKFB_58.region001	NRP	NRP generic	28.85	19
M36	Aegir_M36_B35	APLIPKFB_105.region001	NRP	NRP generic	37.79	7
M36	Aegir_M36_B35	APLIPKFB_119.region001	Hybrid	NRPS:T1PKS	46.01	21
M36	Aegir_M36_B36	LDCPKHLH_297.region001	Other	nucleoside	6.63	8
M36	Aegir_M36_B37	BIGHILKH_292.region001	RiPP	RiPP-like	6.04	7
M36	Aegir_M36_B38	AIHPAFBK_13.region001	RiPP	RiPP-like	9.72	10
M36	Aegir_M36_B38	AIHPAFBK_1.region001	Other	ectoine	10.4	10
M36	Aegir_M36_B38	AIHPAFBK_26.region001	Polyketide	T3PKS	24.33	24
M36	Aegir_M36_B38	AIHPAFBK_78.region001	RiPP	RiPP-like	7.24	5
M36	Aegir_M36_B39	EJJLEDJN_13.region001	Other	hydrogen-cyanide	13.22	9
M36	Aegir_M36_B4	MFMOEDNK_190.region001	RiPP	RRE-containing	11.82	9
M36	Aegir_M36_B4	MFMOEDNK_230.region001	RiPP	RRE-containing	16.02	13
M36	Aegir_M36_B40	MACFFGIF_121.region001	Other	arylpolyene	9.13	12
M36	Aegir_M36_B40	MACFFGIF_64.region001	RiPP	RiPP-like	8.8	12
M36	Aegir_M36_B40	MACFFGIF_25.region001	Terpene	Terpene generic	19.13	16
M36	Aegir_M36_B40	MACFFGIF_20.region001	RiPP	redox-cofactor	17.14	15
M36	Aegir_M36_B41	ONIHFDBF_163.region001	Other	arylpolyene	8.48	9
M36	Aegir_M36_B41	ONIHFDBF_73.region001	RiPP	RiPP-like	7.53	6
M36	Aegir_M36_B41	ONIHFDBF_135.region001	NRP	NRPS-like	23.59	22
M36	Aegir_M36_B41	ONIHFDBF_136.region001	RiPP	redox-cofactor	17.5	17
M36	Aegir_M36_B41	ONIHFDBF_122.region001	Terpene	Terpene generic	22.32	18
M36	Aegir_M36_B42	CENODMGI_107.region001	Hybrid	arylpolyene:resorcinol	7.86	11
M36	Aegir_M36_B42	CENODMGI_209.region001	Other	arylpolyene	10.35	8
M36	Aegir_M36_B42	CENODMGI_45.region001	RiPP	RiPP-like	9.29	6
M36	Aegir_M36_B42	CENODMGI_86.region001	RiPP	RiPP-like	7.64	7
M36	Aegir_M36_B43	LKNDKLPM_155.region001	RiPP	RRE-containing	15.06	12
M36	Aegir_M36_B43	LKNDKLPM_173.region001	Hybrid	RiPP-like:RRE-containing	16.03	14
M36	Aegir_M36_B43	LKNDKLPM_299.region001	Polyketide	T3PKS	20.77	21
M36	Aegir_M36_B43	LKNDKLPM_314.region001	RiPP	RiPP-like	11.73	7
M36	Aegir_M36_B43	LKNDKLPM_364.region001	Polyketide	T1PKS	21.88	16
M36	Aegir_M36_B43	LKNDKLPM_402.region001	Terpene	Terpene generic	25.48	17
M36	Aegir_M36_B43	LKNDKLPM_509.region001	RiPP	RiPP-like	10.59	12
M36	Aegir_M36_B43	LKNDKLPM_524.region001	RiPP	RiPP-like	12.2	9
M36	Aegir_M36_B44	GAILNMON_187.region001	Other	hserlactone	19.58	24
M36	Aegir_M36_B44	GAILNMON_94.region001	Other	hserlactone	14.33	13
M36	Aegir_M36_B44	GAILNMON_203.region001	RiPP	RiPP-like	8.81	10
M36	Aegir_M36_B45	KCAABIEO_135.region001	Polyketide	T1PKS	11.06	4
M36	Aegir_M36_B45	KCAABIEO_7.region001	Polyketide	T1PKS	9.33	5
M36	Aegir_M36_B45	KCAABIEO_245.region001	NRP	CDPS	10.74	13
M36	Aegir_M36_B46	AODPIKDL_104.region001	RiPP	RiPP-like	10.94	10
M36	Aegir_M36_B46	AODPIKDL_115.region001	NRP	NRPS-like	25.55	18
M36	Aegir_M36_B46	AODPIKDL_123.region001	Other	resorcinol	42.02	33
M36	Aegir_M36_B46	AODPIKDL_136.region001	Terpene	Terpene generic	17.89	11
M36	Aegir_M36_B46	AODPIKDL_136.region002	Other	betalactone	21.42	15
M36	Aegir_M36_B46	AODPIKDL_155.region001	RiPP	RiPP-like	10.85	9
M36	Aegir_M36_B46	AODPIKDL_47.region001	RiPP	ranthipeptide	29.2	25
M36	Aegir_M36_B46	AODPIKDL_58.region001	NRP	NRPS-like	27.2	18
M36	Aegir_M36_B46	AODPIKDL_61.region001	RiPP	RiPP-like	11.16	12
M36	Aegir_M36_B46	AODPIKDL_6.region001	Polyketide	hglE-KS	40.6	25
M36	Aegir_M36_B48	IGGOJNFL_133.region001	Other	acyl_amino_acids	3.2	4
M36	Aegir_M36_B48	IGGOJNFL_34.region001	RiPP	RiPP-like	2.64	4
M36	Aegir_M36_B48	IGGOJNFL_15.region001	Other	arylpolyene	6.05	6
M36	Aegir_M36_B49	CFBHPGFJ_56.region001	Hybrid	arylpolyene:resorcinol	51.9	51
M36	Aegir_M36_B49	CFBHPGFJ_64.region001	RiPP	RRE-containing	19.61	18
M36	Aegir_M36_B5	NNMJOBBE_320.region001	Other	resorcinol	11.18	13
M36	Aegir_M36_B5	NNMJOBBE_227.region001	Other	arylpolyene	9.68	9
M36	Aegir_M36_B5	NNMJOBBE_392.region001	Polyketide	hglE-KS	8.72	2
M36	Aegir_M36_B50	ECGDAIFI_37.region001	RiPP	lanthipeptide	16.25	14
M36	Aegir_M36_B51	AJHKFCJO_47.region001	RiPP	RRE-containing	6.11	6
M36	Aegir_M36_B53	IDFHELPL_13.region001	RiPP	RiPP-like	8.01	9
M36	Aegir_M36_B53	IDFHELPL_14.region001	Other	hserlactone	20.83	17
M36	Aegir_M36_B53	IDFHELPL_36.region001	RiPP	RRE-containing	20.28	26
M36	Aegir_M36_B54	NEFIDIMH_95.region001	RiPP	RRE-containing	16.96	14
M36	Aegir_M36_B54	NEFIDIMH_10.region001	Hybrid	arylpolyene:resorcinol	36.68	40
M36	Aegir_M36_B56	GDAKIHJJ_89.region001	Other	arylpolyene	41.15	35
M36	Aegir_M36_B57	IIFEMMGK_13.region001	RiPP	RiPP-like	3.46	4
M36	Aegir_M36_B57	IIFEMMGK_195.region001	RiPP	RRE-containing	2.89	6
M36	Aegir_M36_B58	DAMCAHIH_182.region001	Terpene	Terpene generic	18.17	14
M36	Aegir_M36_B58	DAMCAHIH_64.region001	RiPP	RRE-containing	18.08	12
M36	Aegir_M36_B59	LBFMECOL_22.region001	Hybrid	arylpolyene:resorcinol	36.63	38
M36	Aegir_M36_B6	ECPJPLJJ_165.region001	RiPP	RRE-containing	5.08	8
M36	Aegir_M36_B60	IJJGOFGK_480.region001	NRP	NRP generic	7.25	2
M36	Aegir_M36_B60	IJJGOFGK_152.region001	RiPP	RRE-containing	10.04	9
M36	Aegir_M36_B60	IJJGOFGK_293.region001	Polyketide	T1PKS	6.73	2
M36	Aegir_M36_B60	IJJGOFGK_296.region001	Terpene	Terpene generic	3.38	4
M36	Aegir_M36_B60	IJJGOFGK_174.region001	Polyketide	T1PKS	4.46	1
M36	Aegir_M36_B61	JOELOLGC_6.region001	RiPP	thiopeptide	41.39	39
M36	Aegir_M36_B61	JOELOLGC_24.region001	Polyketide	hglE-KS	42.23	35
M36	Aegir_M36_B61	JOELOLGC_4.region001	Other	hydrogen-cyanide	13.46	13
M36	Aegir_M36_B61	JOELOLGC_3.region001	Hybrid	hglE-KS:T1PKS	31.05	20
M36	Aegir_M36_B61	JOELOLGC_46.region001	Other	hydrogen-cyanide	13.92	12
M36	Aegir_M36_B61	JOELOLGC_39.region001	RiPP	thiopeptide	31.32	26
M36	Aegir_M36_B61	JOELOLGC_41.region001	Other	betalactone	23.85	17
M36	Aegir_M36_B62	NDIICOJF_10.region001	Other	betalactone	30.2	23
M36	Aegir_M36_B62	NDIICOJF_10.region002	Hybrid	arylpolyene:resorcinol	50.35	52
M36	Aegir_M36_B62	NDIICOJF_21.region001	RiPP	RRE-containing	20.25	13
M36	Aegir_M36_B62	NDIICOJF_21.region002	Other	betalactone	28.72	20
M36	Aegir_M36_B63	OGCOFHCG_20.region001	RiPP	RiPP-like	9.83	10
M36	Aegir_M36_B63	OGCOFHCG_9.region001	Other	betalactone	26.94	20
M36	Aegir_M36_B63	OGCOFHCG_25.region001	RiPP	RiPP-like	11.71	9
M36	Aegir_M36_B63	OGCOFHCG_18.region001	Polyketide	T3PKS	15.91	16
M36	Aegir_M36_B64	GKCHABDB_107.region001	Polyketide	hglE-KS	29.6	8
M36	Aegir_M36_B64	GKCHABDB_129.region001	RiPP	RiPP-like	10.87	6
M36	Aegir_M36_B64	GKCHABDB_147.region001	Hybrid	hglE-KS:T3PKS	43.37	33
M36	Aegir_M36_B64	GKCHABDB_160.region001	NRP	NRPS-like	28.5	23
M36	Aegir_M36_B64	GKCHABDB_168.region001	Polyketide	T1PKS	49.85	36
M36	Aegir_M36_B64	GKCHABDB_34.region001	Polyketide	T1PKS	18.54	10
M36	Aegir_M36_B64	GKCHABDB_50.region001	Other	arylpolyene	26.15	26
M36	Aegir_M36_B64	GKCHABDB_61.region001	Polyketide	hglE-KS	45.69	39
M36	Aegir_M36_B64	GKCHABDB_67.region001	Other	betalactone	31.83	32
M36	Aegir_M36_B64	GKCHABDB_68.region001	Other	arylpolyene	29.43	21
M36	Aegir_M36_B64	GKCHABDB_75.region001	Hybrid	hglE-KS:T1PKS	24.29	19
M36	Aegir_M36_B64	GKCHABDB_77.region001	Polyketide	T1PKS	14.3	9
M36	Aegir_M36_B64	GKCHABDB_86.region001	Other	arylpolyene	29.07	31
M36	Aegir_M36_B64	GKCHABDB_92.region001	Hybrid	lassopeptide:RRE-containing	22.13	27
M36	Aegir_M36_B65	OKGIDNFP_63.region001	RiPP	RRE-containing	7.58	6
M36	Aegir_M36_B65	OKGIDNFP_82.region001	Other	resorcinol	27.29	22
M36	Aegir_M36_B65	OKGIDNFP_86.region001	Other	arylpolyene	13.95	12
M36	Aegir_M36_B66	EOCGDEIA_30.region001	NRP	NRP generic	11.82	3
M36	Aegir_M36_B66	EOCGDEIA_59.region001	NRP	NRP generic	4.01	2
M36	Aegir_M36_B67	KOOHGOLM_203.region001	NRP	NRP generic	3.4	1
M36	Aegir_M36_B67	KOOHGOLM_225.region001	RiPP	RiPP-like	2.71	3
M36	Aegir_M36_B68	MLCMMGOM_284.region001	RiPP	RRE-containing	3.16	3
M36	Aegir_M36_B69	GLOGLBCN_111.region001	Other	arylpolyene	24.84	16
M36	Aegir_M36_B69	GLOGLBCN_162.region001	Other	arylpolyene	18.05	14
M36	Aegir_M36_B69	GLOGLBCN_196.region001	Other	arylpolyene	21.52	16
M36	Aegir_M36_B69	GLOGLBCN_2.region001	RiPP	lanthipeptide	11.41	7
M36	Aegir_M36_B69	GLOGLBCN_56.region001	Hybrid	arylpolyene:resorcinol	26.19	23
M36	Aegir_M36_B71	JGCHBLFO_150.region001	Terpene	Terpene generic	2.05	2
M36	Aegir_M36_B71	JGCHBLFO_45.region001	Terpene	Terpene generic	3.74	2
M36	Aegir_M36_B71	JGCHBLFO_340.region001	RiPP	redox-cofactor	4.9	6
M36	Aegir_M36_B71	JGCHBLFO_296.region001	Other	arylpolyene	3.69	6
M36	Aegir_M36_B71	JGCHBLFO_374.region001	RiPP	RiPP-like	6.16	6
M36	Aegir_M36_B72	ALEHICHF_185.region001	Other	betalactone	22.96	22
M36	Aegir_M36_B72	ALEHICHF_27.region001	Other	betalactone	24.42	17
M36	Aegir_M36_B73	PDMGNGAF_160.region001	NRP	NRP generic	9.88	4
M36	Aegir_M36_B73	PDMGNGAF_71.region001	Terpene	Terpene generic	7.15	4
M36	Aegir_M36_B73	PDMGNGAF_88.region001	RiPP	ranthipeptide	4.55	6
M36	Aegir_M36_B73	PDMGNGAF_177.region001	RiPP	RiPP-like	6.41	6
M36	Aegir_M36_B8	KIEHLOCK_177.region001	RiPP	RRE-containing	13.81	13
M36	Aegir_M36_B9	IJMCNGDJ_25.region001	Other	arylpolyene	41.21	45
M36	Aegir_M36_B9	IJMCNGDJ_32.region001	Other	ectoine	10.4	8
M36	Aegir_M36_B9	IJMCNGDJ_34.region001	RiPP	RiPP-like	10.85	14
M36	Aegir_M36_B9	IJMCNGDJ_52.region001	Terpene	Terpene generic	22.76	19
M36	Aegir_M36_B9	IJMCNGDJ_130.region001	RiPP	redox-cofactor	5.54	7
M37	Aegir_M37_B1	IPOPAIFA_180.region001	RiPP	ranthipeptide	7.56	7
M37	Aegir_M37_B1	IPOPAIFA_360.region001	Terpene	Terpene generic	3.46	6
M37	Aegir_M37_B10	CFKOCBML_118.region001	Other	resorcinol	6.42	8
M37	Aegir_M37_B10	CFKOCBML_169.region001	Other	arylpolyene	6.26	10
M37	Aegir_M37_B10	CFKOCBML_67.region001	Other	arylpolyene	2.65	3
M37	Aegir_M37_B11	EIPHLLKK_128.region001	Other	arylpolyene	7.29	7
M37	Aegir_M37_B11	EIPHLLKK_409.region001	Polyketide	HR-T2PKS	6.82	7
M37	Aegir_M37_B11	EIPHLLKK_72.region001	Other	arylpolyene	14.2	15
M37	Aegir_M37_B12	GGOKCDCL_209.region001	RiPP	redox-cofactor	4.77	7
M37	Aegir_M37_B12	GGOKCDCL_68.region001	Terpene	Terpene generic	15.36	12
M37	Aegir_M37_B13	OIGOLJNO_16.region001	RiPP	ranthipeptide	20.16	20
M37	Aegir_M37_B14	CBENGHKH_1.region001	Other	arylpolyene	11.91	8
M37	Aegir_M37_B14	CBENGHKH_280.region001	Terpene	Terpene generic	9.24	5
M37	Aegir_M37_B14	CBENGHKH_40.region001	Other	ectoine	5.5	4
M37	Aegir_M37_B14	CBENGHKH_143.region001	RiPP	RiPP-like	6.83	6
M37	Aegir_M37_B15	EHALHDMF_16.region001	Terpene	Terpene generic	4.85	3
M37	Aegir_M37_B15	EHALHDMF_373.region001	RiPP	RRE-containing	5.09	7
M37	Aegir_M37_B16	DJGDOFOD_178.region001	Other	arylpolyene	2.76	4
M37	Aegir_M37_B16	DJGDOFOD_299.region001	Other	betalactone	3.56	3
M37	Aegir_M37_B16	DJGDOFOD_85.region001	RiPP	redox-cofactor	4.72	6
M37	Aegir_M37_B17	NGEBLNKK_119.region001	Other	hydrogen-cyanide	9.07	9
M37	Aegir_M37_B17	NGEBLNKK_11.region001	Other	arylpolyene	9.61	9
M37	Aegir_M37_B17	NGEBLNKK_39.region001	NRP	NRPS-like	27.73	26
M37	Aegir_M37_B17	NGEBLNKK_71.region001	RiPP	RiPP-like	3.27	5
M37	Aegir_M37_B17	NGEBLNKK_126.region001	RiPP	RiPP-like	10.85	8
M37	Aegir_M37_B17	NGEBLNKK_142.region001	RiPP	redox-cofactor	22.24	25
M37	Aegir_M37_B17	NGEBLNKK_140.region001	Terpene	Terpene generic	23	17
M37	Aegir_M37_B19	ODLDNGCH_253.region001	Terpene	Terpene generic	2.07	2
M37	Aegir_M37_B19	ODLDNGCH_288.region001	Terpene	Terpene generic	2.11	2
M37	Aegir_M37_B19	ODLDNGCH_28.region001	Terpene	Terpene generic	2.19	1
M37	Aegir_M37_B2	BKNOFKLA_52.region001	RiPP	RiPP-like	8.36	6
M37	Aegir_M37_B2	BKNOFKLA_75.region001	Terpene	Terpene generic	3.37	3
M37	Aegir_M37_B20	JKPCDLON_8.region001	NRP	CDPS	20.69	17
M37	Aegir_M37_B21	JBPFJJCB_123.region001	RiPP	redox-cofactor	5.21	6
M37	Aegir_M37_B21	JBPFJJCB_163.region001	RiPP	RiPP-like	6.49	9
M37	Aegir_M37_B21	JBPFJJCB_62.region001	Terpene	Terpene generic	3.43	3
M37	Aegir_M37_B21	JBPFJJCB_100.region001	Terpene	Terpene generic	12.24	14
M37	Aegir_M37_B21	JBPFJJCB_210.region001	Terpene	Terpene generic	7.59	5
M37	Aegir_M37_B21	JBPFJJCB_256.region001	RiPP	RiPP-like	8.79	9
M37	Aegir_M37_B21	JBPFJJCB_118.region001	NRP	NRPS-like	13.75	15
M37	Aegir_M37_B21	JBPFJJCB_60.region001	Other	arylpolyene	12.01	17
M37	Aegir_M37_B22	NLCMHHHC_156.region001	Polyketide	T1PKS	41.05	29
M37	Aegir_M37_B22	NLCMHHHC_225.region001	RiPP	RiPP-like	8.18	9
M37	Aegir_M37_B22	NLCMHHHC_240.region001	Other	NAPAA	4.82	1
M37	Aegir_M37_B22	NLCMHHHC_241.region001	RiPP	RiPP-like	9.37	11
M37	Aegir_M37_B22	NLCMHHHC_253.region001	RiPP	RiPP-like	3.99	5
M37	Aegir_M37_B22	NLCMHHHC_258.region001	Terpene	Terpene generic	4.84	5
M37	Aegir_M37_B22	NLCMHHHC_295.region001	NRP	NRP generic	24.79	17
M37	Aegir_M37_B22	NLCMHHHC_39.region001	NRP	NRPS-like	16.43	11
M37	Aegir_M37_B22	NLCMHHHC_61.region001	Other	crocagin	16.1	6
M37	Aegir_M37_B23	JCMCOKNO_148.region001	Polyketide	T3PKS	3.56	4
M37	Aegir_M37_B23	JCMCOKNO_191.region001	RiPP	RiPP-like	2.58	1
M37	Aegir_M37_B23	JCMCOKNO_287.region001	Polyketide	HR-T2PKS	2.05	3
M37	Aegir_M37_B23	JCMCOKNO_475.region001	Other	arylpolyene	7.63	8
M37	Aegir_M37_B23	JCMCOKNO_484.region001	Other	arylpolyene	2	3
M37	Aegir_M37_B23	JCMCOKNO_648.region001	Polyketide	T3PKS	6.94	6
M37	Aegir_M37_B24	PDEOMJHC_159.region001	Polyketide	hglE-KS	6.45	2
M37	Aegir_M37_B24	PDEOMJHC_252.region001	Other	hydrogen-cyanide	5.25	4
M37	Aegir_M37_B25	DGIHFKDF_385.region001	RiPP	lanthipeptide	7.94	4
M37	Aegir_M37_B26	GNFAAGLJ_124.region001	Other	hydrogen-cyanide	12.4	10
M37	Aegir_M37_B27	FDOHJKJH_117.region001	RiPP	RiPP-like	10.83	12
M37	Aegir_M37_B27	FDOHJKJH_196.region001	Other	arylpolyene	8.17	10
M37	Aegir_M37_B27	FDOHJKJH_280.region001	Other	arylpolyene	9.17	10
M37	Aegir_M37_B27	FDOHJKJH_30.region001	RiPP	RRE-containing	11.32	8
M37	Aegir_M37_B27	FDOHJKJH_517.region001	RiPP	RRE-containing	11.9	10
M37	Aegir_M37_B28	IAFKBFLO_119.region001	Other	arylpolyene	6.42	9
M37	Aegir_M37_B29	EMBCFOFO_111.region001	RiPP	RiPP-like	4.93	5
M37	Aegir_M37_B29	EMBCFOFO_60.region001	RiPP	RRE-containing	6.75	7
M37	Aegir_M37_B3	HNCLEMDB_119.region001	RiPP	RiPP-like	4.09	3
M37	Aegir_M37_B30	MNOMKIBA_153.region001	RiPP	lanthipeptide	16.43	15
M37	Aegir_M37_B30	MNOMKIBA_253.region001	Hybrid	NRPS-like:T1PKS	21.16	8
M37	Aegir_M37_B30	MNOMKIBA_65.region001	Hybrid	arylpolyene:resorcinol	47.38	41
M37	Aegir_M37_B30	MNOMKIBA_87.region001	NRP	NRP generic	24.07	16
M37	Aegir_M37_B30	MNOMKIBA_9.region001	NRP	NRPS-like	2.87	2
M37	Aegir_M37_B32	JFNMFPJL_107.region001	Other	hserlactone	8.02	10
M37	Aegir_M37_B32	JFNMFPJL_198.region001	RiPP	redox-cofactor	15.29	20
M37	Aegir_M37_B32	JFNMFPJL_283.region001	RiPP	RiPP-like	10.86	12
M37	Aegir_M37_B32	JFNMFPJL_86.region001	Hybrid	NRPS-like:T1PKS	18.73	7
M37	Aegir_M37_B34	GOGOMFGK_256.region001	NRP	NRPS-like	12.24	6
M37	Aegir_M37_B35	CJICECBE_196.region001	Other	resorcinol	7.79	9
M37	Aegir_M37_B35	CJICECBE_42.region001	Other	arylpolyene	3.74	5
M37	Aegir_M37_B36	HECOAHAK_1.region001	RiPP	RRE-containing	3	3
M37	Aegir_M37_B36	HECOAHAK_45.region001	Hybrid	arylpolyene:resorcinol	30.86	36
M37	Aegir_M37_B37	NEILPPCH_150.region001	Polyketide	T3PKS	5.63	5
M37	Aegir_M37_B37	NEILPPCH_205.region001	RiPP	RRE-containing	4.83	6
M37	Aegir_M37_B37	NEILPPCH_323.region001	RiPP	RiPP-like	3.97	5
M37	Aegir_M37_B37	NEILPPCH_380.region001	RiPP	RRE-containing	3.11	3
M37	Aegir_M37_B38	PGEEBHBE_18.region001	RiPP	RRE-containing	20.38	13
M37	Aegir_M37_B39	HAEKJFGP_146.region001	Other	hserlactone	3.33	4
M37	Aegir_M37_B39	HAEKJFGP_176.region001	RiPP	RiPP-like	2.99	5
M37	Aegir_M37_B39	HAEKJFGP_416.region001	Other	hserlactone	2.64	2
M37	Aegir_M37_B39	HAEKJFGP_454.region001	Terpene	Terpene generic	11.7	11
M37	Aegir_M37_B39	HAEKJFGP_549.region001	RiPP	RRE-containing	2.39	3
M37	Aegir_M37_B40	LOEOMKJD_107.region001	Other	hydrogen-cyanide	13.21	11
M37	Aegir_M37_B40	LOEOMKJD_49.region001	RiPP	ranthipeptide	26.57	31
M37	Aegir_M37_B40	LOEOMKJD_89.region001	RiPP	ranthipeptide	6.62	6
M37	Aegir_M37_B40	LOEOMKJD_90.region001	RiPP	ranthipeptide	8.89	10
M37	Aegir_M37_B40	LOEOMKJD_99.region001	RiPP	sactipeptide	15.52	13
M37	Aegir_M37_B41	CICNOPNC_131.region001	RiPP	RiPP-like	5.98	6
M37	Aegir_M37_B41	CICNOPNC_17.region001	Other	arylpolyene	16.27	18
M37	Aegir_M37_B41	CICNOPNC_188.region001	NRP	NRPS-like	22.75	15
M37	Aegir_M37_B41	CICNOPNC_35.region001	Other	arylpolyene	24.5	21
M37	Aegir_M37_B41	CICNOPNC_59.region001	Other	resorcinol	28.15	25
M37	Aegir_M37_B42	BJPDIAKJ_106.region001	Polyketide	T1PKS	19.07	12
M37	Aegir_M37_B42	BJPDIAKJ_127.region001	RiPP	RiPP-like	8.51	11
M37	Aegir_M37_B42	BJPDIAKJ_65.region001	RiPP	RiPP-like	10.84	11
M37	Aegir_M37_B43	DFOIADHH_91.region001	RiPP	RiPP-like	3.76	5
M37	Aegir_M37_B46	FJIODLBK_30.region001	RiPP	RiPP-like	10.86	13
M37	Aegir_M37_B46	FJIODLBK_68.region001	Other	betalactone	20.25	16
M37	Aegir_M37_B47	IMHBHNJB_65.region001	RiPP	RiPP-like	11.11	9
M37	Aegir_M37_B47	IMHBHNJB_42.region001	RiPP	RRE-containing	20.26	17
M37	Aegir_M37_B47	IMHBHNJB_47.region001	RiPP	RiPP-like	10.85	10
M37	Aegir_M37_B47	IMHBHNJB_95.region001	Terpene	Terpene generic	18.93	21
M37	Aegir_M37_B47	IMHBHNJB_70.region001	RiPP	redox-cofactor	12.13	13
M37	Aegir_M37_B47	IMHBHNJB_127.region001	Terpene	Terpene generic	11.6	11
M37	Aegir_M37_B49	NLCOFIOL_160.region001	Other	ectoine	3.22	4
M37	Aegir_M37_B49	NLCOFIOL_317.region001	RiPP	RRE-containing	2.43	3
M37	Aegir_M37_B49	NLCOFIOL_646.region001	NRP	NRPS-like	4.24	2
M37	Aegir_M37_B5	EBBODCAE_246.region001	NRP	NRPS-like	25.59	23
M37	Aegir_M37_B5	EBBODCAE_426.region001	RiPP	RRE-containing	4.85	4
M37	Aegir_M37_B5	EBBODCAE_74.region001	RiPP	RiPP-like	7.59	6
M37	Aegir_M37_B50	LMEHLNPI_309.region001	RiPP	RiPP-like	3.39	4
M37	Aegir_M37_B50	LMEHLNPI_646.region001	RiPP	RiPP-like	2.65	3
M37	Aegir_M37_B50	LMEHLNPI_730.region001	RiPP	RRE-containing	2.04	3
M37	Aegir_M37_B51	OHMOLDFD_637.region001	Polyketide	T1PKS	3.36	1
M37	Aegir_M37_B53	NBONLNAG_16.region001	RiPP	RRE-containing	12.92	15
M37	Aegir_M37_B54	LHGBMGDM_138.region001	RiPP	RiPP-like	5.97	7
M37	Aegir_M37_B54	LHGBMGDM_390.region001	Other	hydrogen-cyanide	9.04	5
M37	Aegir_M37_B55	JNFBDKIP_106.region001	Terpene	Terpene generic	5.18	4
M37	Aegir_M37_B55	JNFBDKIP_20.region001	RiPP	RRE-containing	11.79	4
M37	Aegir_M37_B55	JNFBDKIP_230.region001	RiPP	RRE-containing	3.58	5
M37	Aegir_M37_B55	JNFBDKIP_407.region001	RiPP	RiPP-like	7.3	7
M37	Aegir_M37_B55	JNFBDKIP_581.region001	Polyketide	T3PKS	7.89	6
M37	Aegir_M37_B55	JNFBDKIP_707.region001	Other	arylpolyene	16.52	9
M37	Aegir_M37_B56	LAJLOBNE_120.region001	RiPP	RRE-containing	14.68	12
M37	Aegir_M37_B56	LAJLOBNE_247.region001	RiPP	RiPP-like	5.43	7
M37	Aegir_M37_B56	LAJLOBNE_324.region001	RiPP	RRE-containing	10.66	8
M37	Aegir_M37_B56	LAJLOBNE_363.region001	Polyketide	T1PKS	14.18	5
M37	Aegir_M37_B6	INLLGIOK_20.region001	RiPP	ranthipeptide	11.87	13
M37	Aegir_M37_B6	INLLGIOK_22.region001	Terpene	Terpene generic	21.2	14
M37	Aegir_M37_B6	INLLGIOK_39.region001	RiPP	RiPP-like	10.86	11
M37	Aegir_M37_B6	INLLGIOK_3.region001	Other	arylpolyene	43.6	43
M37	Aegir_M37_B6	INLLGIOK_44.region001	Other	arylpolyene	18.39	22
M37	Aegir_M37_B6	INLLGIOK_21.region001	Other	resorcinol	41.11	41
M37	Aegir_M37_B6	INLLGIOK_89.region001	RiPP	RiPP-like	10.85	11
M37	Aegir_M37_B7	EBIPKGNL_1372.region001	RiPP	RRE-containing	3.19	4
M37	Aegir_M37_B7	EBIPKGNL_1592.region001	NRP	NRPS-like	3.66	2
M37	Aegir_M37_B7	EBIPKGNL_1798.region001	Other	arylpolyene	2.31	2
M37	Aegir_M37_B7	EBIPKGNL_30.region001	Terpene	Terpene generic	7	8
M37	Aegir_M37_B7	EBIPKGNL_876.region001	Other	arylpolyene	6.57	7
M37	Aegir_M37_B7	EBIPKGNL_900.region001	Terpene	Terpene generic	2.86	2
M37	Aegir_M37_B8	OHAGCPAB_304.region001	RiPP	RRE-containing	7.33	7
M37	Aegir_M37_B8	OHAGCPAB_227.region001	Terpene	Terpene generic	10.52	5
M37	Aegir_M37_B9	EMJIGOFO_64.region001	Other	arylpolyene	7.88	8
M37	Aegir_M37_B9	EMJIGOFO_50.region002	RiPP	RiPP-like	10.85	11
M37	Aegir_M37_B9	EMJIGOFO_50.region001	RiPP	redox-cofactor	16.52	16
M37	Aegir_M37_B9	EMJIGOFO_71.region001	NRP	NRP generic	43.82	26
M37	Aegir_M37_B9	EMJIGOFO_113.region001	Other	hydrogen-cyanide	12.8	12
M37	Aegir_M37_B9	EMJIGOFO_155.region001	Terpene	Terpene generic	16.47	12
M37	Aegir_M37_B9	EMJIGOFO_120.region001	Other	arylpolyene	4.75	2
M38	Aegir_M38_B1	KIECNAKK_93.region001	RiPP	RiPP-like	7.88	9
M38	Aegir_M38_B10	GHIKEMJA_194.region001	RiPP	RiPP-like	4.87	5
M38	Aegir_M38_B10	GHIKEMJA_313.region001	NRP	NRP generic	3.08	1
M38	Aegir_M38_B10	GHIKEMJA_42.region001	Other	arylpolyene	3.17	1
M38	Aegir_M38_B10	GHIKEMJA_43.region001	NRP	NRP generic	9.38	9
M38	Aegir_M38_B10	GHIKEMJA_53.region001	NRP	NRPS-like	5.5	2
M38	Aegir_M38_B10	GHIKEMJA_96.region001	Terpene	Terpene generic	4.07	2
M38	Aegir_M38_B10	GHIKEMJA_175.region001	RiPP	redox-cofactor	5.49	5
M38	Aegir_M38_B101	OPDMMHKB_26.region001	Other	arylpolyene	35.94	38
M38	Aegir_M38_B101	OPDMMHKB_58.region001	NRP	NRP generic	44.62	37
M38	Aegir_M38_B102	CFOIEDKB_195.region001	RiPP	RRE-containing	20.25	15
M38	Aegir_M38_B103	GFMOCMNL_119.region001	Other	arylpolyene	10.1	9
M38	Aegir_M38_B103	GFMOCMNL_242.region001	Other	resorcinol	11.43	15
M38	Aegir_M38_B103	GFMOCMNL_326.region001	Polyketide	T1PKS	10.24	6
M38	Aegir_M38_B103	GFMOCMNL_358.region001	Other	arylpolyene	16.7	16
M38	Aegir_M38_B103	GFMOCMNL_41.region001	Terpene	Terpene generic	11.86	14
M38	Aegir_M38_B103	GFMOCMNL_484.region001	Terpene	Terpene generic	5.71	6
M38	Aegir_M38_B103	GFMOCMNL_518.region001	RiPP	RRE-containing	9.98	9
M38	Aegir_M38_B103	GFMOCMNL_545.region001	Other	arylpolyene	6.88	7
M38	Aegir_M38_B104	ENCCGMIM_46.region001	RiPP	ranthipeptide	21.18	13
M38	Aegir_M38_B104	ENCCGMIM_73.region001	Other	betalactone	27.23	30
M38	Aegir_M38_B104	ENCCGMIM_22.region001	Terpene	Terpene generic	16.05	16
M38	Aegir_M38_B105	GECPGONF_120.region001	RiPP	RRE-containing	20.24	28
M38	Aegir_M38_B105	GECPGONF_1.region001	RiPP	RiPP-like	8.78	10
M38	Aegir_M38_B105	GECPGONF_22.region001	RiPP	RRE-containing	20.28	24
M38	Aegir_M38_B106	ILCDLNJB_64.region001	Terpene	Terpene generic	3.35	2
M38	Aegir_M38_B109	PLALPCGD_70.region001	RiPP	RRE-containing	3	3
M38	Aegir_M38_B13	JGAODFDO_11.region001	RiPP	RRE-containing	20.28	15
M38	Aegir_M38_B13	JGAODFDO_32.region001	RiPP	RiPP-like	10.86	10
M38	Aegir_M38_B13	JGAODFDO_8.region001	RiPP	RRE-containing	20.24	16
M38	Aegir_M38_B14	KGMMKEAO_80.region001	Terpene	Terpene generic	2.98	2
M38	Aegir_M38_B15	PNCLIAJG_176.region001	Other	arylpolyene	4.08	4
M38	Aegir_M38_B15	PNCLIAJG_200.region001	Other	arylpolyene	3.63	5
M38	Aegir_M38_B16	IOIKAMCH_36.region001	Other	acyl_amino_acids	4.88	6
M38	Aegir_M38_B18	CDLOGJGO_39.region001	RiPP	RRE-containing	10.47	10
M38	Aegir_M38_B19	ECPBKFON_167.region001	RiPP	RRE-containing	13.74	13
M38	Aegir_M38_B19	ECPBKFON_70.region001	Polyketide	hglE-KS	23.11	6
M38	Aegir_M38_B19	ECPBKFON_90.region001	Other	ectoine	5.57	6
M38	Aegir_M38_B2	FILNCIPO_491.region001	Other	hserlactone	4.41	7
M38	Aegir_M38_B2	FILNCIPO_514.region001	Other	hserlactone	3.25	4
M38	Aegir_M38_B20	CFBDOOPH_194.region001	RiPP	RRE-containing	4.28	4
M38	Aegir_M38_B21	NIMPLCKH_142.region001	Polyketide	T1PKS	11.54	6
M38	Aegir_M38_B21	NIMPLCKH_193.region001	RiPP	RiPP-like	7.25	7
M38	Aegir_M38_B21	NIMPLCKH_11.region001	Other	arylpolyene	36.55	36
M38	Aegir_M38_B21	NIMPLCKH_3.region001	Other	hydrogen-cyanide	8.83	9
M38	Aegir_M38_B21	NIMPLCKH_54.region001	RiPP	redox-cofactor	22.25	20
M38	Aegir_M38_B21	NIMPLCKH_23.region001	Terpene	Terpene generic	19.85	15
M38	Aegir_M38_B22	HBKOMCGO_49.region001	Other	hserlactone	17.13	12
M38	Aegir_M38_B22	HBKOMCGO_53.region001	Terpene	Terpene generic	11.82	12
M38	Aegir_M38_B22	HBKOMCGO_9.region001	Terpene	Terpene generic	19.61	20
M38	Aegir_M38_B22	HBKOMCGO_20.region001	RiPP	redox-cofactor	22.19	23
M38	Aegir_M38_B22	HBKOMCGO_36.region001	RiPP	RiPP-like	11.74	12
M38	Aegir_M38_B22	HBKOMCGO_22.region001	RiPP	RiPP-like	10.85	12
M38	Aegir_M38_B23	IJJEGNDG_82.region001	Terpene	Terpene generic	11.61	11
M38	Aegir_M38_B23	IJJEGNDG_11.region001	Hybrid	NRPS:T1PKS	32.77	19
M38	Aegir_M38_B23	IJJEGNDG_225.region001	RiPP	RRE-containing	15.34	16
M38	Aegir_M38_B23	IJJEGNDG_205.region001	NRP	NRP generic	49.37	16
M38	Aegir_M38_B23	IJJEGNDG_68.region001	NRP	NRP generic	9.54	2
M38	Aegir_M38_B25	CIGBJIDC_133.region001	Terpene	Terpene generic	14.38	15
M38	Aegir_M38_B25	CIGBJIDC_43.region001	Hybrid	arylpolyene:resorcinol	44.04	42
M38	Aegir_M38_B25	CIGBJIDC_81.region001	Other	arylpolyene	41.49	41
M38	Aegir_M38_B26	BHAGBGDA_124.region001	Terpene	Terpene generic	17.43	14
M38	Aegir_M38_B26	BHAGBGDA_23.region001	Other	arylpolyene	21.75	20
M38	Aegir_M38_B26	BHAGBGDA_27.region001	RiPP	RiPP-like	10.85	10
M38	Aegir_M38_B26	BHAGBGDA_6.region001	NRP	NRP generic	43.82	32
M38	Aegir_M38_B26	BHAGBGDA_98.region001	RiPP	redox-cofactor	25.63	21
M38	Aegir_M38_B28	AKLHHOGF_201.region001	RiPP	RiPP-like	5.51	5
M38	Aegir_M38_B28	AKLHHOGF_88.region001	NRP	NRPS-like	21.95	20
M38	Aegir_M38_B28	AKLHHOGF_99.region001	NRP	NRPS-like	6.32	4
M38	Aegir_M38_B29	COJGKPDN_31.region001	Polyketide	T3PKS	3.63	5
M38	Aegir_M38_B29	COJGKPDN_330.region001	RiPP	RRE-containing	6.05	8
M38	Aegir_M38_B3	IAPKAHNK_3.region001	RiPP	RiPP-like	6.54	6
M38	Aegir_M38_B30	APGDIBME_12.region001	NRP	NRP generic	28.15	20
M38	Aegir_M38_B30	APGDIBME_16.region001	Hybrid	NRPS:T1PKS	49.4	40
M38	Aegir_M38_B30	APGDIBME_25.region001	RiPP	ranthipeptide	15.45	15
M38	Aegir_M38_B30	APGDIBME_27.region001	Terpene	Terpene generic	22.35	16
M38	Aegir_M38_B30	APGDIBME_32.region001	Terpene	Terpene generic	23.07	19
M38	Aegir_M38_B31	JEMMGIEH_106.region001	Hybrid	arylpolyene:resorcinol	25.4	27
M38	Aegir_M38_B31	JEMMGIEH_26.region001	Other	arylpolyene	7.42	6
M38	Aegir_M38_B32	EHIJNLMB_171.region001	RiPP	RiPP-like	4.56	6
M38	Aegir_M38_B32	EHIJNLMB_130.region001	Terpene	Terpene generic	15.46	16
M38	Aegir_M38_B32	EHIJNLMB_2.region001	Other	hserlactone	20.64	18
M38	Aegir_M38_B32	EHIJNLMB_97.region001	RiPP	RiPP-like	9.2	8
M38	Aegir_M38_B33	BIBOBJMB_144.region001	RiPP	RRE-containing	17.35	14
M38	Aegir_M38_B33	BIBOBJMB_211.region001	Other	arylpolyene	3.35	2
M38	Aegir_M38_B33	BIBOBJMB_214.region001	RiPP	RiPP-like	6.71	7
M38	Aegir_M38_B33	BIBOBJMB_307.region001	Other	arylpolyene	12.48	13
M38	Aegir_M38_B33	BIBOBJMB_308.region001	RiPP	RRE-containing	11.77	13
M38	Aegir_M38_B33	BIBOBJMB_42.region001	RiPP	lassopeptide	21.5	27
M38	Aegir_M38_B33	BIBOBJMB_92.region001	RiPP	RiPP-like	9.2	9
M38	Aegir_M38_B35	NPMGFPNF_1112.region001	RiPP	RiPP-like	2.54	2
M38	Aegir_M38_B35	NPMGFPNF_58.region001	RiPP	RiPP-like	3.05	2
M38	Aegir_M38_B35	NPMGFPNF_594.region001	Terpene	Terpene generic	3.09	3
M38	Aegir_M38_B36	JNFGIEIN_107.region001	RiPP	RiPP-like	6.9	6
M38	Aegir_M38_B36	JNFGIEIN_4.region001	Terpene	Terpene generic	14.32	16
M38	Aegir_M38_B36	JNFGIEIN_99.region001	Other	hserlactone	18.23	16
M38	Aegir_M38_B36	JNFGIEIN_11.region001	RiPP	RRE-containing	21.27	27
M38	Aegir_M38_B37	JNIPKFCK_94.region001	RiPP	RiPP-like	6.38	8
M38	Aegir_M38_B38	LMPFGBPF_127.region001	Terpene	Terpene generic	20.77	22
M38	Aegir_M38_B38	LMPFGBPF_9.region001	RiPP	RiPP-like	4.67	6
M38	Aegir_M38_B38	LMPFGBPF_136.region001	RiPP	RiPP-like	5.77	7
M38	Aegir_M38_B4	CCEEDJDB_76.region001	RiPP	ranthipeptide	12.77	16
M38	Aegir_M38_B4	CCEEDJDB_27.region001	RiPP	RiPP-like	11.18	10
M38	Aegir_M38_B42	APGNHLOD_104.region001	RiPP	ranthipeptide	11.99	13
M38	Aegir_M38_B42	APGNHLOD_34.region001	Terpene	Terpene generic	12.57	10
M38	Aegir_M38_B43	NPMKINEH_108.region001	Terpene	Terpene generic	19.14	26
M38	Aegir_M38_B43	NPMKINEH_135.region001	NRP	NRP generic	46.4	19
M38	Aegir_M38_B43	NPMKINEH_141.region001	Other	arylpolyene	21.76	25
M38	Aegir_M38_B43	NPMKINEH_226.region001	NRP	NRP generic	9.86	2
M38	Aegir_M38_B44	FIGLHJNH_12.region001	Other	arylpolyene	20.62	25
M38	Aegir_M38_B44	FIGLHJNH_16.region001	RiPP	RiPP-like	11.64	9
M38	Aegir_M38_B44	FIGLHJNH_83.region001	RiPP	RRE-containing	20.24	16
M38	Aegir_M38_B45	PDGCENIA_65.region001	Terpene	Terpene generic	16.99	12
M38	Aegir_M38_B45	PDGCENIA_280.region001	NRP	NRPS-like	10.96	13
M38	Aegir_M38_B45	PDGCENIA_181.region001	RiPP	RiPP-like	6.6	5
M38	Aegir_M38_B46	GILEGNBK_184.region001	Terpene	Terpene generic	7.49	6
M38	Aegir_M38_B47	IIPPKAGC_14.region001	RiPP	RiPP-like	10.46	8
M38	Aegir_M38_B49	KHHHKCJG_19.region001	Other	hydrogen-cyanide	10.23	7
M38	Aegir_M38_B49	KHHHKCJG_249.region001	RiPP	RiPP-like	11.73	7
M38	Aegir_M38_B49	KHHHKCJG_257.region001	RiPP	RiPP-like	11.76	9
M38	Aegir_M38_B50	ONIMNOCE_16.region001	RiPP	RiPP-like	11.75	9
M38	Aegir_M38_B50	ONIMNOCE_75.region001	RiPP	RiPP-like	10.43	11
M38	Aegir_M38_B52	GCJABBPA_119.region001	Polyketide	T3PKS	41.06	35
M38	Aegir_M38_B52	GCJABBPA_134.region001	Terpene	Terpene generic	4.6	5
M38	Aegir_M38_B52	GCJABBPA_57.region001	Hybrid	NRPS-like:T1PKS	32.11	20
M38	Aegir_M38_B53	PEHBDAKJ_4.region001	RiPP	RiPP-like	10.01	6
M38	Aegir_M38_B53	PEHBDAKJ_88.region001	RiPP	RiPP-like	4.74	5
M38	Aegir_M38_B54	IPCMLAMI_124.region001	RiPP	RRE-containing	8.19	10
M38	Aegir_M38_B54	IPCMLAMI_199.region001	Terpene	Terpene generic	8.5	8
M38	Aegir_M38_B57	ENFPJDJP_123.region001	Terpene	Terpene generic	11.97	11
M38	Aegir_M38_B57	ENFPJDJP_372.region001	Terpene	Terpene generic	4.33	2
M38	Aegir_M38_B57	ENFPJDJP_571.region001	Other	other	3.65	5
M38	Aegir_M38_B57	ENFPJDJP_700.region001	Polyketide	T1PKS	9.24	1
M38	Aegir_M38_B57	ENFPJDJP_706.region001	Terpene	Terpene generic	3.67	3
M38	Aegir_M38_B57	ENFPJDJP_715.region001	NRP	NRPS-like	12.22	10
M38	Aegir_M38_B6	LPEMMCJN_63.region001	RiPP	RRE-containing	11.16	8
M38	Aegir_M38_B61	EHKJGOEI_623.region001	Other	hserlactone	9.15	8
M38	Aegir_M38_B64	NAOKMLNH_135.region001	RiPP	LAP	8.11	7
M38	Aegir_M38_B64	NAOKMLNH_36.region001	RiPP	RiPP-like	9.6	6
M38	Aegir_M38_B64	NAOKMLNH_48.region001	RiPP	RiPP-like	7.87	8
M38	Aegir_M38_B64	NAOKMLNH_87.region001	Polyketide	T3PKS	10.91	11
M38	Aegir_M38_B64	NAOKMLNH_95.region001	Polyketide	hglE-KS	42.21	21
M38	Aegir_M38_B66	EMLCJMHO_100.region001	NRP	NRP generic	22.71	10
M38	Aegir_M38_B66	EMLCJMHO_126.region001	Hybrid	arylpolyene:resorcinol	29.11	29
M38	Aegir_M38_B66	EMLCJMHO_35.region001	RiPP	thiopeptide	21.4	15
M38	Aegir_M38_B66	EMLCJMHO_94.region001	Other	arylpolyene	17.34	16
M38	Aegir_M38_B67	ADJEFGIL_159.region001	Hybrid	arylpolyene:resorcinol	23.09	23
M38	Aegir_M38_B67	ADJEFGIL_184.region001	RiPP	lassopeptide	16.4	12
M38	Aegir_M38_B67	ADJEFGIL_21.region001	RiPP	RiPP-like	11.75	8
M38	Aegir_M38_B67	ADJEFGIL_44.region001	RiPP	RRE-containing	14.09	9
M38	Aegir_M38_B67	ADJEFGIL_49.region001	NRP	NRPS-like	22.12	17
M38	Aegir_M38_B68	FFDAKDOA_14.region001	Terpene	Terpene generic	25.16	24
M38	Aegir_M38_B7	KJAMEGOG_257.region001	Other	hydrogen-cyanide	4.8	4
M38	Aegir_M38_B7	KJAMEGOG_470.region001	NRP	NRP generic	5.94	5
M38	Aegir_M38_B7	KJAMEGOG_641.region001	Terpene	Terpene generic	2.14	2
M38	Aegir_M38_B71	CPPEEGKI_169.region001	Polyketide	T3PKS	17.12	18
M38	Aegir_M38_B71	CPPEEGKI_295.region001	Terpene	Terpene generic	4.52	4
M38	Aegir_M38_B71	CPPEEGKI_311.region001	Terpene	Terpene generic	5.46	5
M38	Aegir_M38_B72	JLHIKFCN_28.region001	Other	hydrogen-cyanide	12.8	11
M38	Aegir_M38_B72	JLHIKFCN_50.region001	Terpene	Terpene generic	22.85	17
M38	Aegir_M38_B72	JLHIKFCN_72.region001	RiPP	ranthipeptide	12.08	12
M38	Aegir_M38_B72	JLHIKFCN_96.region001	Other	arylpolyene	41.2	43
M38	Aegir_M38_B73	GACEDKPE_108.region001	NRP	CDPS	14.16	15
M38	Aegir_M38_B73	GACEDKPE_18.region001	RiPP	ranthipeptide	12.84	12
M38	Aegir_M38_B73	GACEDKPE_70.region001	Other	arylpolyene	20.96	21
M38	Aegir_M38_B73	GACEDKPE_74.region001	RiPP	RiPP-like	8.98	10
M38	Aegir_M38_B73	GACEDKPE_81.region001	Terpene	Terpene generic	13	11
M38	Aegir_M38_B73	GACEDKPE_85.region001	Polyketide	T1PKS	27.81	19
M38	Aegir_M38_B74	CNCNCCNP_209.region001	RiPP	RiPP-like	6.8	7
M38	Aegir_M38_B74	CNCNCCNP_72.region001	RiPP	RiPP-like	4.38	5
M38	Aegir_M38_B75	IBOODKDA_98.region001	RiPP	ranthipeptide	12.19	11
M38	Aegir_M38_B76	BPOLMMFO_207.region001	RiPP	ranthipeptide	26.94	16
M38	Aegir_M38_B76	BPOLMMFO_63.region001	RiPP	RRE-containing	20.26	16
M38	Aegir_M38_B76	BPOLMMFO_66.region001	Polyketide	hglE-KS	22.16	12
M38	Aegir_M38_B76	BPOLMMFO_82.region001	NRP	NRPS-like	30.92	24
M38	Aegir_M38_B77	IEOKNLIK_35.region001	RiPP	RiPP-like	11.51	10
M38	Aegir_M38_B77	IEOKNLIK_64.region001	Hybrid	arylpolyene:resorcinol	37.9	43
M38	Aegir_M38_B79	CGJFFKOE_1.region001	RiPP	thiopeptide	44.06	42
M38	Aegir_M38_B8	EBIDJMJL_52.region001	Other	arylpolyene	8.6	10
M38	Aegir_M38_B8	EBIDJMJL_212.region001	Other	arylpolyene	15.02	17
M38	Aegir_M38_B8	EBIDJMJL_43.region001	RiPP	RRE-containing	16.96	14
M38	Aegir_M38_B80	MIKMEDDN_29.region001	Terpene	Terpene generic	20.85	22
M38	Aegir_M38_B80	MIKMEDDN_10.region001	RiPP	redox-cofactor	16.14	16
M38	Aegir_M38_B80	MIKMEDDN_104.region001	RiPP	RiPP-like	8.46	8
M38	Aegir_M38_B80	MIKMEDDN_50.region001	Terpene	Terpene generic	11.49	11
M38	Aegir_M38_B80	MIKMEDDN_77.region001	RiPP	RiPP-like	10.85	12
M38	Aegir_M38_B81	FPKJGNPI_207.region001	RiPP	RiPP-like	5.2	6
M38	Aegir_M38_B81	FPKJGNPI_532.region001	RiPP	RRE-containing	2.93	2
M38	Aegir_M38_B82	ODMODOJI_34.region001	Terpene	Terpene generic	7.36	6
M38	Aegir_M38_B82	ODMODOJI_63.region001	RiPP	RRE-containing	10.86	12
M38	Aegir_M38_B83	BIPNPGMJ_368.region001	RiPP	RRE-containing	20.27	14
M38	Aegir_M38_B83	BIPNPGMJ_698.region001	NRP	NRPS-like	17.89	13
M38	Aegir_M38_B84	LMKJOADE_26.region001	Terpene	Terpene generic	20.84	22
M38	Aegir_M38_B84	LMKJOADE_40.region001	RiPP	RiPP-like	7.5	9
M38	Aegir_M38_B85	ACLCOCJL_32.region001	Other	hserlactone	16.97	11
M38	Aegir_M38_B85	ACLCOCJL_4.region001	RiPP	RiPP-like	4.72	4
M38	Aegir_M38_B85	ACLCOCJL_87.region001	RiPP	RiPP-like	8.69	5
M38	Aegir_M38_B86	CHPEPIBD_118.region001	RiPP	RRE-containing	4.33	7
M38	Aegir_M38_B87	ICAEBNNE_140.region001	RiPP	RRE-containing	15.12	6
M38	Aegir_M38_B87	ICAEBNNE_5.region001	RiPP	thiopeptide	15.97	18
M38	Aegir_M38_B87	ICAEBNNE_73.region001	RiPP	RRE-containing	12.44	7
M38	Aegir_M38_B88	MOJNHEPC_107.region001	Other	arylpolyene	36.98	32
M38	Aegir_M38_B88	MOJNHEPC_194.region001	NRP	NRP generic	25.48	2
M38	Aegir_M38_B88	MOJNHEPC_197.region001	RiPP	RiPP-like	10.02	9
M38	Aegir_M38_B88	MOJNHEPC_200.region001	Other	ectoine	8.45	8
M38	Aegir_M38_B88	MOJNHEPC_235.region001	RiPP	RiPP-like	8	7
M38	Aegir_M38_B88	MOJNHEPC_238.region001	Other	hydrogen-cyanide	8.28	8
M38	Aegir_M38_B88	MOJNHEPC_262.region001	NRP	NRP generic	26.46	20
M38	Aegir_M38_B88	MOJNHEPC_283.region001	NRP	NRP generic	34.66	22
M38	Aegir_M38_B88	MOJNHEPC_290.region001	Hybrid	NRPS:NRP-metallophore	38.45	27
M38	Aegir_M38_B88	MOJNHEPC_326.region001	Hybrid	NRPS:NRP-metallophore	25.77	8
M38	Aegir_M38_B88	MOJNHEPC_365.region001	Terpene	Terpene generic	21.04	17
M38	Aegir_M38_B88	MOJNHEPC_58.region001	RiPP	redox-cofactor	22.16	18
M38	Aegir_M38_B88	MOJNHEPC_7.region001	Other	NAGGN	10.65	7
M38	Aegir_M38_B88	MOJNHEPC_85.region001	RiPP	RiPP-like	7.34	6
M38	Aegir_M38_B88	MOJNHEPC_94.region001	RiPP	RiPP-like	6.41	8
M38	Aegir_M38_B88	MOJNHEPC_347.region001	NRP	NRP generic	34.03	23
M38	Aegir_M38_B89	KDNKGBAB_28.region001	Hybrid	arylpolyene:resorcinol	46.46	46
M38	Aegir_M38_B9	KPMAJJBN_117.region001	RiPP	RRE-containing	9.23	8
M38	Aegir_M38_B9	KPMAJJBN_153.region001	RiPP	RiPP-like	7.74	5
M38	Aegir_M38_B9	KPMAJJBN_164.region001	Other	arylpolyene	8.08	8
M38	Aegir_M38_B9	KPMAJJBN_198.region001	Other	arylpolyene	7.8	10
M38	Aegir_M38_B90	NBPCDCCG_10.region001	RiPP	thioamitides	14.96	12
M38	Aegir_M38_B91	KMNIKALC_139.region001	Other	arylpolyene	14.55	17
M38	Aegir_M38_B91	KMNIKALC_28.region001	Terpene	Terpene generic	6.45	5
M38	Aegir_M38_B91	KMNIKALC_87.region001	RiPP	RRE-containing	8.92	6
M38	Aegir_M38_B91	KMNIKALC_90.region001	RiPP	ranthipeptide	13.99	13
M38	Aegir_M38_B92	HJJGMEJB_43.region001	Hybrid	arylpolyene:resorcinol	53.24	49
M38	Aegir_M38_B92	HJJGMEJB_51.region001	RiPP	RRE-containing	13.69	14
M38	Aegir_M38_B92	HJJGMEJB_7.region001	RiPP	RiPP-like	10.1	13
M38	Aegir_M38_B93	EKBDCPHF_159.region001	RiPP	RiPP-like	4.32	5
M38	Aegir_M38_B93	EKBDCPHF_29.region001	Other	hserlactone	5.54	7
M38	Aegir_M38_B93	EKBDCPHF_69.region001	Terpene	Terpene generic	8.17	9
M38	Aegir_M38_B93	EKBDCPHF_47.region001	RiPP	RRE-containing	7.64	10
M38	Aegir_M38_B94	JGNNONIO_152.region001	RiPP	RiPP-like	10.07	10
M38	Aegir_M38_B94	JGNNONIO_49.region001	Other	arylpolyene	19.21	18
M38	Aegir_M38_B95	NLOGALHF_173.region001	NRP	NRPS-like	4.54	3
M38	Aegir_M38_B95	NLOGALHF_181.region001	Other	arylpolyene	8.14	8
M38	Aegir_M38_B95	NLOGALHF_228.region001	Other	arylpolyene	2.73	5
M38	Aegir_M38_B95	NLOGALHF_247.region001	RiPP	thiopeptide	17.72	15
M38	Aegir_M38_B95	NLOGALHF_283.region001	RiPP	RiPP-like	5.21	5
M38	Aegir_M38_B95	NLOGALHF_95.region001	Other	arylpolyene	9.45	8
M38	Aegir_M38_B95	NLOGALHF_99.region001	Other	resorcinol	4.52	4
M38	Aegir_M38_B97	JJGJHDOE_110.region001	RiPP	RiPP-like	10.8	9
M38	Aegir_M38_B97	JJGJHDOE_5.region001	RiPP	thioamitides	22.53	18
M38	Aegir_M38_B97	JJGJHDOE_6.region001	RiPP	RRE-containing	20.29	16
M38	Aegir_M38_B97	JJGJHDOE_82.region001	RiPP	RRE-containing	12.66	12
M38	Aegir_M38_B97	JJGJHDOE_8.region001	RiPP	sactipeptide	21.46	19
M38	Aegir_M38_B98	BFAFEAIL_417.region001	RiPP	RiPP-like	2.58	2
M38	Aegir_M38_B98	BFAFEAIL_8.region001	RiPP	RRE-containing	9.34	11
M38	Aegir_M38_B99	IBPAHCCO_37.region001	Terpene	Terpene generic	11.5	11
M38	Aegir_M38_B99	IBPAHCCO_2.region001	Terpene	Terpene generic	20.86	20
M38	Aegir_M38_B99	IBPAHCCO_7.region001	RiPP	RiPP-like	10.85	10
M38	Aegir_M38_B99	IBPAHCCO_15.region001	Other	ectoine	7.1	6
M38	Aegir_M38_B99	IBPAHCCO_47.region001	RiPP	RiPP-like	8.94	8
M38	Aegir_M38_B99	IBPAHCCO_54.region001	RiPP	redox-cofactor	14.27	15
M39	Aegir_M39_B10	FFHPKHEG_259.region001	RiPP	RRE-containing	13.39	11
M39	Aegir_M39_B100	HPDNPIEA_107.region001	Terpene	Terpene generic	7.4	5
M39	Aegir_M39_B100	HPDNPIEA_170.region001	Terpene	Terpene generic	3	3
M39	Aegir_M39_B100	HPDNPIEA_257.region001	Other	arylpolyene	9.19	8
M39	Aegir_M39_B100	HPDNPIEA_267.region001	RiPP	RRE-containing	2.69	3
M39	Aegir_M39_B100	HPDNPIEA_481.region001	Other	arylpolyene	10.26	8
M39	Aegir_M39_B100	HPDNPIEA_4.region001	RiPP	RRE-containing	7.91	5
M39	Aegir_M39_B100	HPDNPIEA_695.region001	Other	arylpolyene	2.47	4
M39	Aegir_M39_B101	OOLOLMOA_27.region001	RiPP	sactipeptide	15.72	19
M39	Aegir_M39_B102	HHBKGBCH_73.region001	NRP	NRP generic	35.93	24
M39	Aegir_M39_B102	HHBKGBCH_35.region001	Other	hydrogen-cyanide	10.24	10
M39	Aegir_M39_B102	HHBKGBCH_15.region001	Hybrid	hserlactone:RiPP-redox-cofactor	42.22	33
M39	Aegir_M39_B102	HHBKGBCH_70.region001	Terpene	Terpene generic	20.08	16
M39	Aegir_M39_B102	HHBKGBCH_84.region001	Polyketide	T1PKS	25.72	15
M39	Aegir_M39_B102	HHBKGBCH_86.region001	RiPP	lassopeptide	23.84	18
M39	Aegir_M39_B103	COHBNLED_189.region001	RiPP	RRE-containing	5.35	7
M39	Aegir_M39_B104	BDNAFLFJ_54.region001	Other	hserlactone	18.89	17
M39	Aegir_M39_B104	BDNAFLFJ_79.region001	RiPP	RiPP-like	10.87	12
M39	Aegir_M39_B105	MEBADGCM_128.region001	Hybrid	NRPS-like:T1PKS	15.85	12
M39	Aegir_M39_B105	MEBADGCM_146.region001	Hybrid	NRPS:T1PKS	25	12
M39	Aegir_M39_B106	FIODDFIH_341.region001	Other	nucleoside	6.54	7
M39	Aegir_M39_B107	FJEEDFAB_82.region001	RiPP	RRE-containing	7.28	10
M39	Aegir_M39_B108	ELMMPHKD_253.region001	Other	hserlactone	16.11	13
M39	Aegir_M39_B108	ELMMPHKD_43.region001	RiPP	RiPP-like	9.57	11
M39	Aegir_M39_B109	ICBCKKKK_16.region001	RiPP	RRE-containing	14.43	11
M39	Aegir_M39_B109	ICBCKKKK_30.region001	Other	hydrogen-cyanide	9.49	6
M39	Aegir_M39_B109	ICBCKKKK_35.region001	Other	betalactone	17.23	15
M39	Aegir_M39_B11	KAPCIHNN_34.region001	RiPP	RRE-containing	22.31	12
M39	Aegir_M39_B11	KAPCIHNN_38.region001	Terpene	Terpene generic	18.66	14
M39	Aegir_M39_B110	BFEMGKGJ_104.region001	Terpene	Terpene generic	16.65	15
M39	Aegir_M39_B110	BFEMGKGJ_125.region001	Other	arylpolyene	29.23	23
M39	Aegir_M39_B110	BFEMGKGJ_12.region001	NRP	NRPS-like	28.27	24
M39	Aegir_M39_B110	BFEMGKGJ_41.region001	RiPP	ranthipeptide	23	21
M39	Aegir_M39_B110	BFEMGKGJ_46.region001	RiPP	RRE-containing	20.29	20
M39	Aegir_M39_B111	EOABJBEP_289.region001	Other	resorcinol	3.01	3
M39	Aegir_M39_B111	EOABJBEP_130.region001	RiPP	RiPP-like	3.66	5
M39	Aegir_M39_B111	EOABJBEP_411.region001	Other	phosphonate	6.64	5
M39	Aegir_M39_B111	EOABJBEP_410.region001	RiPP	RiPP-like	3.01	3
M39	Aegir_M39_B111	EOABJBEP_350.region001	Terpene	Terpene generic	8.2	10
M39	Aegir_M39_B111	EOABJBEP_308.region001	NRP	NRPS-like	3.06	2
M39	Aegir_M39_B112	ICNECMED_130.region001	NRP	NRP generic	59.13	24
M39	Aegir_M39_B112	ICNECMED_48.region001	Hybrid	NRPS:T1PKS	32.51	18
M39	Aegir_M39_B112	ICNECMED_87.region001	NRP	NRP generic	9.52	2
M39	Aegir_M39_B112	ICNECMED_135.region001	Terpene	Terpene generic	4.99	4
M39	Aegir_M39_B112	ICNECMED_123.region001	RiPP	RRE-containing	20.34	19
M39	Aegir_M39_B113	NBHHOGLK_46.region001	RiPP	RRE-containing	3.46	2
M39	Aegir_M39_B117	IAKFMJEM_125.region001	Other	hserlactone	16.63	16
M39	Aegir_M39_B117	IAKFMJEM_197.region001	Other	hserlactone	8.22	10
M39	Aegir_M39_B117	IAKFMJEM_253.region001	Other	hserlactone	10.84	12
M39	Aegir_M39_B117	IAKFMJEM_44.region001	Other	betalactone	7.97	5
M39	Aegir_M39_B117	IAKFMJEM_55.region001	Other	ectoine	6.47	8
M39	Aegir_M39_B119	MHCCPFAL_41.region001	Polyketide	T1PKS	7.62	4
M39	Aegir_M39_B119	MHCCPFAL_183.region001	Other	hydrogen-cyanide	6.93	7
M39	Aegir_M39_B119	MHCCPFAL_134.region001	RiPP	ranthipeptide	2.28	3
M39	Aegir_M39_B119	MHCCPFAL_205.region001	Terpene	Terpene generic	15.78	13
M39	Aegir_M39_B119	MHCCPFAL_130.region001	Other	arylpolyene	25.63	27
M39	Aegir_M39_B119	MHCCPFAL_245.region001	RiPP	RiPP-like	10.85	9
M39	Aegir_M39_B120	EEAGJODL_140.region001	Terpene	Terpene generic	15.37	14
M39	Aegir_M39_B120	EEAGJODL_184.region001	NRP	NRPS-like	6.52	4
M39	Aegir_M39_B120	EEAGJODL_210.region001	NRP	NRPS-like	29.78	24
M39	Aegir_M39_B120	EEAGJODL_216.region001	Polyketide	hglE-KS	36.63	22
M39	Aegir_M39_B120	EEAGJODL_240.region001	Polyketide	T1PKS	32.42	21
M39	Aegir_M39_B120	EEAGJODL_247.region001	RiPP	lassopeptide	23.3	25
M39	Aegir_M39_B120	EEAGJODL_366.region001	RiPP	RiPP-like	9.71	6
M39	Aegir_M39_B120	EEAGJODL_89.region001	Terpene	Terpene generic	20.93	16
M39	Aegir_M39_B121	JGGEIKLM_42.region001	RiPP	RRE-containing	20.25	18
M39	Aegir_M39_B121	JGGEIKLM_65.region001	Hybrid	arylpolyene:resorcinol	53.78	53
M39	Aegir_M39_B122	FJKJBIGP_155.region001	RiPP	RRE-containing	7.52	6
M39	Aegir_M39_B122	FJKJBIGP_58.region001	RiPP	RRE-containing	17.42	19
M39	Aegir_M39_B123	GAPCFIGP_110.region001	Other	hydrogen-cyanide	14.23	13
M39	Aegir_M39_B123	GAPCFIGP_126.region001	RiPP	RiPP-like	11.72	9
M39	Aegir_M39_B123	GAPCFIGP_133.region001	RiPP	RiPP-like	11.73	8
M39	Aegir_M39_B123	GAPCFIGP_13.region001	Other	hydrogen-cyanide	13.23	10
M39	Aegir_M39_B123	GAPCFIGP_23.region001	RiPP	RiPP-like	11.87	9
M39	Aegir_M39_B123	GAPCFIGP_97.region001	Terpene	Terpene generic	12.47	19
M39	Aegir_M39_B125	LGFNCOND_218.region001	NRP	NRP generic	13.54	3
M39	Aegir_M39_B125	LGFNCOND_229.region001	NRP	NRP generic	37.69	14
M39	Aegir_M39_B125	LGFNCOND_188.region001	Polyketide	T3PKS	24.64	16
M39	Aegir_M39_B125	LGFNCOND_5.region001	Hybrid	NRPS:T1PKS	39.38	18
M39	Aegir_M39_B126	NGIDNPEH_3.region001	Terpene	Terpene generic	22.03	19
M39	Aegir_M39_B126	NGIDNPEH_9.region001	Other	arylpolyene	41.23	36
M39	Aegir_M39_B126	NGIDNPEH_20.region001	NRP	NRPS-like	42.64	37
M39	Aegir_M39_B126	NGIDNPEH_9.region002	Other	arylpolyene	42.25	32
M39	Aegir_M39_B126	NGIDNPEH_13.region001	RiPP	thiopeptide	26.25	20
M39	Aegir_M39_B126	NGIDNPEH_5.region001	Hybrid	arylpolyene:resorcinol	48.33	44
M39	Aegir_M39_B127	GNEJKKOJ_15.region001	RiPP	RiPP-like	11.74	7
M39	Aegir_M39_B127	GNEJKKOJ_50.region001	Other	betalactone	17.11	12
M39	Aegir_M39_B127	GNEJKKOJ_16.region001	RiPP	RiPP-like	10.85	15
M39	Aegir_M39_B128	EBJAGHMO_34.region001	Terpene	Terpene generic	20.76	23
M39	Aegir_M39_B128	EBJAGHMO_62.region001	Other	betalactone	27.34	26
M39	Aegir_M39_B128	EBJAGHMO_92.region001	Other	hserlactone	20.61	23
M39	Aegir_M39_B128	EBJAGHMO_93.region001	Other	hserlactone	20.59	25
M39	Aegir_M39_B128	EBJAGHMO_9.region001	Other	hserlactone	20.64	20
M39	Aegir_M39_B129	OLACNJPO_243.region001	Hybrid	lassopeptide:RRE-containing	6.43	6
M39	Aegir_M39_B129	OLACNJPO_221.region001	Other	hserlactone	7.38	7
M39	Aegir_M39_B129	OLACNJPO_349.region001	RiPP	RiPP-like	5.14	4
M39	Aegir_M39_B13	OPIOGPAO_16.region001	Other	arylpolyene	41.15	35
M39	Aegir_M39_B130	JFCMDGKC_107.region001	Other	arylpolyene	6.87	7
M39	Aegir_M39_B130	JFCMDGKC_195.region001	Other	arylpolyene	9.22	8
M39	Aegir_M39_B130	JFCMDGKC_252.region001	Polyketide	hglE-KS	2.81	2
M39	Aegir_M39_B131	GCPFHCHN_427.region001	RiPP	RRE-containing	2.04	3
M39	Aegir_M39_B131	GCPFHCHN_440.region001	Polyketide	HR-T2PKS	3.63	3
M39	Aegir_M39_B132	BFAJAABG_70.region001	Other	arylpolyene	3.3	4
M39	Aegir_M39_B134	LCJGCDAJ_109.region001	RiPP	RiPP-like	5.57	5
M39	Aegir_M39_B134	LCJGCDAJ_79.region001	Terpene	Terpene generic	4.19	2
M39	Aegir_M39_B135	HPJDLMAJ_131.region001	Other	acyl_amino_acids	2.99	4
M39	Aegir_M39_B135	HPJDLMAJ_244.region001	RiPP	RiPP-like	2.98	3
M39	Aegir_M39_B135	HPJDLMAJ_252.region001	Polyketide	hglE-KS	2.17	1
M39	Aegir_M39_B135	HPJDLMAJ_448.region001	RiPP	thiopeptide	2.85	3
M39	Aegir_M39_B135	HPJDLMAJ_96.region001	Other	acyl_amino_acids	4.89	5
M39	Aegir_M39_B136	IGJLCKIK_38.region001	Hybrid	arylpolyene:resorcinol	46.91	47
M39	Aegir_M39_B136	IGJLCKIK_46.region001	Other	betalactone	29.73	19
M39	Aegir_M39_B136	IGJLCKIK_4.region001	RiPP	RRE-containing	20.25	18
M39	Aegir_M39_B136	IGJLCKIK_8.region001	Hybrid	arylpolyene:resorcinol	68.43	62
M39	Aegir_M39_B136	IGJLCKIK_8.region002	RiPP	RiPP-like	10.85	8
M39	Aegir_M39_B137	MGGLONMC_3.region001	Hybrid	arylpolyene:resorcinol	36.71	40
M39	Aegir_M39_B137	MGGLONMC_113.region001	RiPP	RRE-containing	16.76	14
M39	Aegir_M39_B138	DACILNEH_13.region001	Terpene	Terpene generic	14.74	12
M39	Aegir_M39_B138	DACILNEH_24.region001	RiPP	RiPP-like	10.86	13
M39	Aegir_M39_B138	DACILNEH_30.region001	RiPP	RiPP-like	10.72	9
M39	Aegir_M39_B138	DACILNEH_54.region001	Other	phosphonate	14.98	16
M39	Aegir_M39_B138	DACILNEH_70.region001	RiPP	redox-cofactor	22.22	22
M39	Aegir_M39_B139	KPGNBPHH_28.region001	Terpene	Terpene generic	18.94	19
M39	Aegir_M39_B14	OENFBOHI_303.region001	Other	arylpolyene	2.51	2
M39	Aegir_M39_B140	MHDDIMKH_109.region001	NRP	NRP generic	33.84	30
M39	Aegir_M39_B140	MHDDIMKH_115.region001	Terpene	Terpene generic	20.19	18
M39	Aegir_M39_B140	MHDDIMKH_122.region001	Other	arylpolyene	20.61	21
M39	Aegir_M39_B140	MHDDIMKH_44.region001	RiPP	RiPP-like	6.16	6
M39	Aegir_M39_B140	MHDDIMKH_71.region001	RiPP	redox-cofactor	21.29	23
M39	Aegir_M39_B141	FDIMNBAG_121.region001	Hybrid	hglE-KS:T1PKS	31.71	15
M39	Aegir_M39_B141	FDIMNBAG_21.region001	Hybrid	hglE-KS:T1PKS	24.55	10
M39	Aegir_M39_B141	FDIMNBAG_232.region001	Polyketide	T1PKS	15.63	8
M39	Aegir_M39_B141	FDIMNBAG_415.region001	Terpene	Terpene generic	7.42	8
M39	Aegir_M39_B142	GEPOGDIE_170.region001	RiPP	ranthipeptide	7.5	9
M39	Aegir_M39_B143	NFGOFIFO_135.region001	NRP	NRP generic	3.01	1
M39	Aegir_M39_B143	NFGOFIFO_179.region001	NRP	NRP generic	4.88	1
M39	Aegir_M39_B143	NFGOFIFO_207.region001	NRP	NRP generic	5.4	1
M39	Aegir_M39_B143	NFGOFIFO_301.region001	NRP	NRP generic	2.65	1
M39	Aegir_M39_B143	NFGOFIFO_351.region001	NRP	NRP generic	6.45	3
M39	Aegir_M39_B143	NFGOFIFO_493.region001	Terpene	Terpene generic	10.66	10
M39	Aegir_M39_B143	NFGOFIFO_498.region001	NRP	NRP generic	11.61	2
M39	Aegir_M39_B143	NFGOFIFO_511.region001	NRP	NRPS-like	6.08	2
M39	Aegir_M39_B143	NFGOFIFO_568.region001	NRP	NRP generic	5.01	1
M39	Aegir_M39_B144	LEDLLEGN_58.region001	RiPP	RiPP-like	10.83	11
M39	Aegir_M39_B144	LEDLLEGN_43.region001	RiPP	RRE-containing	10.53	12
M39	Aegir_M39_B144	LEDLLEGN_61.region001	Other	hydrogen-cyanide	12.79	13
M39	Aegir_M39_B144	LEDLLEGN_98.region001	NRP	NRPS-like	37.76	36
M39	Aegir_M39_B145	IJCCDICF_112.region001	RiPP	RiPP-like	2.72	2
M39	Aegir_M39_B145	IJCCDICF_139.region001	NRP	NRP generic	6.38	2
M39	Aegir_M39_B145	IJCCDICF_210.region001	NRP	NRPS-like	2.97	4
M39	Aegir_M39_B145	IJCCDICF_402.region001	Terpene	Terpene generic	10.62	7
M39	Aegir_M39_B145	IJCCDICF_415.region001	NRP	NRP generic	3.49	1
M39	Aegir_M39_B145	IJCCDICF_427.region001	NRP	NRPS-like	2.58	1
M39	Aegir_M39_B145	IJCCDICF_51.region001	NRP	NRP generic	2.95	1
M39	Aegir_M39_B145	IJCCDICF_69.region001	NRP	NRP generic	3.09	1
M39	Aegir_M39_B146	OICIJIOO_58.region001	Terpene	Terpene generic	20	18
M39	Aegir_M39_B146	OICIJIOO_10.region001	NRP	NRPS-like	33.95	24
M39	Aegir_M39_B146	OICIJIOO_39.region001	RiPP	RiPP-like	10.85	12
M39	Aegir_M39_B146	OICIJIOO_144.region001	Other	betalactone	31.55	31
M39	Aegir_M39_B146	OICIJIOO_157.region001	Other	hserlactone	11.66	9
M39	Aegir_M39_B146	OICIJIOO_28.region001	RiPP	redox-cofactor	21.29	16
M39	Aegir_M39_B146	OICIJIOO_102.region001	Other	hydrogen-cyanide	8.18	6
M39	Aegir_M39_B146	OICIJIOO_87.region001	Other	arylpolyene	39.35	37
M39	Aegir_M39_B147	FKCHBHNE_67.region001	RiPP	RiPP-like	10.09	4
M39	Aegir_M39_B147	FKCHBHNE_74.region001	Other	nucleoside	21.16	19
M39	Aegir_M39_B148	KAEGOJLK_584.region001	NRP	NRP generic	6.41	3
M39	Aegir_M39_B149	EDJGDHEF_50.region001	Other	hserlactone	16.33	19
M39	Aegir_M39_B149	EDJGDHEF_149.region001	Other	hserlactone	13.79	13
M39	Aegir_M39_B149	EDJGDHEF_101.region001	RiPP	RiPP-like	7.26	9
M39	Aegir_M39_B149	EDJGDHEF_16.region001	Terpene	Terpene generic	14.37	11
M39	Aegir_M39_B149	EDJGDHEF_25.region001	RiPP	redox-cofactor	17.05	21
M39	Aegir_M39_B149	EDJGDHEF_49.region001	Other	arylpolyene	15.48	16
M39	Aegir_M39_B15	JKANDIBI_105.region001	Hybrid	NRPS:T1PKS	32.82	9
M39	Aegir_M39_B15	JKANDIBI_129.region001	Hybrid	NRPS:T1PKS	38.63	18
M39	Aegir_M39_B15	JKANDIBI_16.region001	Polyketide	T3PKS	23.11	18
M39	Aegir_M39_B15	JKANDIBI_276.region001	NRP	NRP generic	31.24	13
M39	Aegir_M39_B15	JKANDIBI_5.region001	RiPP	RRE-containing	5.73	5
M39	Aegir_M39_B15	JKANDIBI_61.region001	NRP	NRP generic	11.59	3
M39	Aegir_M39_B150	GLJOBBPH_429.region001	NRP	NRPS-like	2.52	1
M39	Aegir_M39_B150	GLJOBBPH_357.region001	NRP	NRPS-like	7.12	1
M39	Aegir_M39_B150	GLJOBBPH_377.region001	Polyketide	T1PKS	10.37	4
M39	Aegir_M39_B150	GLJOBBPH_51.region001	RiPP	RRE-containing	13.77	12
M39	Aegir_M39_B150	GLJOBBPH_160.region001	Terpene	Terpene generic	11.24	13
M39	Aegir_M39_B150	GLJOBBPH_145.region001	Terpene	Terpene generic	15.75	13
M39	Aegir_M39_B151	FCBIIHDP_125.region001	Terpene	Terpene generic	21.79	13
M39	Aegir_M39_B151	FCBIIHDP_57.region001	RiPP	RRE-containing	20.27	21
M39	Aegir_M39_B151	FCBIIHDP_89.region001	RiPP	RRE-containing	15.21	16
M39	Aegir_M39_B153	FNBCAEOK_519.region001	Polyketide	T3PKS	9.39	9
M39	Aegir_M39_B153	FNBCAEOK_726.region001	Other	resorcinol	6.56	6
M39	Aegir_M39_B153	FNBCAEOK_891.region001	Other	phosphonate	11.37	10
M39	Aegir_M39_B153	FNBCAEOK_279.region001	RiPP	RiPP-like	3	4
M39	Aegir_M39_B153	FNBCAEOK_924.region001	RiPP	RiPP-like	6.38	4
M39	Aegir_M39_B154	IPGEANND_7.region001	Other	hydrogen-cyanide	13.34	12
M39	Aegir_M39_B154	IPGEANND_9.region001	RiPP	RRE-containing	20.47	12
M39	Aegir_M39_B155	KKPGHLON_124.region001	Polyketide	T3PKS	33.57	29
M39	Aegir_M39_B155	KKPGHLON_31.region001	Terpene	Terpene generic	21.8	17
M39	Aegir_M39_B156	ALMMFMMH_12.region001	RiPP	LAP	8.78	9
M39	Aegir_M39_B158	DAIGHAGO_238.region001	RiPP	RRE-containing	11.28	13
M39	Aegir_M39_B158	DAIGHAGO_373.region001	RiPP	RiPP-like	7.87	8
M39	Aegir_M39_B158	DAIGHAGO_184.region001	Terpene	Terpene generic	4.15	5
M39	Aegir_M39_B158	DAIGHAGO_171.region001	Other	hserlactone	7.57	8
M39	Aegir_M39_B159	LKLMGDAM_249.region001	RiPP	RRE-containing	3.25	4
M39	Aegir_M39_B16	LAEAKBMI_163.region001	RiPP	RiPP-like	2.35	3
M39	Aegir_M39_B16	LAEAKBMI_422.region001	Terpene	Terpene generic	3.14	3
M39	Aegir_M39_B160	ENHKGPJA_248.region001	RiPP	RRE-containing	11.91	7
M39	Aegir_M39_B160	ENHKGPJA_29.region001	RiPP	RRE-containing	4.13	6
M39	Aegir_M39_B160	ENHKGPJA_324.region001	RiPP	RRE-containing	3.63	4
M39	Aegir_M39_B160	ENHKGPJA_326.region001	RiPP	RiPP-like	4.42	2
M39	Aegir_M39_B161	EACKFKNK_79.region001	Other	betalactone	28.52	32
M39	Aegir_M39_B161	EACKFKNK_97.region001	RiPP	RiPP-like	4.66	10
M39	Aegir_M39_B163	GPNINHOO_24.region001	Terpene	Terpene generic	13.29	11
M39	Aegir_M39_B163	GPNINHOO_11.region001	Terpene	Terpene generic	12.29	12
M39	Aegir_M39_B163	GPNINHOO_91.region001	RiPP	redox-cofactor	8.35	9
M39	Aegir_M39_B163	GPNINHOO_5.region001	RiPP	RiPP-like	7.79	7
M39	Aegir_M39_B164	PNPOMJDI_313.region001	RiPP	ranthipeptide	22.28	21
M39	Aegir_M39_B164	PNPOMJDI_93.region001	RiPP	RiPP-like	10.83	11
M39	Aegir_M39_B164	PNPOMJDI_2.region001	Terpene	Terpene generic	20.98	21
M39	Aegir_M39_B164	PNPOMJDI_311.region001	RiPP	RiPP-like	10.74	6
M39	Aegir_M39_B164	PNPOMJDI_85.region001	NRP	NRPS-like	8.84	6
M39	Aegir_M39_B164	PNPOMJDI_56.region001	RiPP	RiPP-like	9.53	12
M39	Aegir_M39_B166	GHHMGHBK_117.region001	RiPP	RiPP-like	10.78	10
M39	Aegir_M39_B166	GHHMGHBK_53.region001	Hybrid	NRPS:lanthipeptide	42.53	28
M39	Aegir_M39_B166	GHHMGHBK_54.region001	Terpene	Terpene generic	11.79	16
M39	Aegir_M39_B166	GHHMGHBK_99.region001	Other	hserlactone	20.64	17
M39	Aegir_M39_B167	NKOFHIIF_622.region001	RiPP	RRE-containing	3.94	3
M39	Aegir_M39_B167	NKOFHIIF_627.region001	RiPP	RRE-containing	8.01	9
M39	Aegir_M39_B168	CPJGGNFP_72.region001	Other	phosphonate	9.65	9
M39	Aegir_M39_B168	CPJGGNFP_141.region001	RiPP	RiPP-like	10.73	12
M39	Aegir_M39_B17	CBJJPFKK_13.region001	Polyketide	T3PKS	38.74	37
M39	Aegir_M39_B17	CBJJPFKK_32.region001	RiPP	RRE-containing	20.24	21
M39	Aegir_M39_B17	CBJJPFKK_17.region001	NRP	NRPS-like	20.66	23
M39	Aegir_M39_B170	FJOFPHMJ_17.region001	Terpene	Terpene generic	21.81	16
M39	Aegir_M39_B171	EIKHOBMN_203.region001	RiPP	RiPP-like	2.84	3
M39	Aegir_M39_B172	EBJEFPEO_13.region001	RiPP	RiPP-like	10.85	9
M39	Aegir_M39_B172	EBJEFPEO_44.region001	Polyketide	T3PKS	8.35	7
M39	Aegir_M39_B172	EBJEFPEO_4.region001	Terpene	Terpene generic	26.03	16
M39	Aegir_M39_B173	LOGKCIHJ_109.region001	Terpene	Terpene generic	5.37	5
M39	Aegir_M39_B173	LOGKCIHJ_31.region001	Terpene	Terpene generic	4.99	4
M39	Aegir_M39_B174	PAJIPFJH_122.region001	RiPP	RRE-containing	15.93	15
M39	Aegir_M39_B174	PAJIPFJH_141.region001	NRP	NRP generic	39.72	33
M39	Aegir_M39_B174	PAJIPFJH_161.region001	Hybrid	hglE-KS:T1PKS	47.8	33
M39	Aegir_M39_B174	PAJIPFJH_32.region001	Other	hserlactone	6	7
M39	Aegir_M39_B174	PAJIPFJH_84.region001	RiPP	RiPP-like	6.4	6
M39	Aegir_M39_B174	PAJIPFJH_136.region001	Terpene	Terpene generic	23.08	20
M39	Aegir_M39_B174	PAJIPFJH_52.region001	RiPP	redox-cofactor	20.65	21
M39	Aegir_M39_B175	JCDKLONH_37.region001	RiPP	RiPP-like	6.02	8
M39	Aegir_M39_B175	JCDKLONH_113.region001	RiPP	RRE-containing	12.55	13
M39	Aegir_M39_B175	JCDKLONH_167.region001	RiPP	RRE-containing	14.6	12
M39	Aegir_M39_B177	DPONBGFN_110.region001	Hybrid	arylpolyene:resorcinol	45.85	43
M39	Aegir_M39_B178	AIAADNBJ_131.region001	RiPP	RiPP-like	10.89	7
M39	Aegir_M39_B178	AIAADNBJ_148.region001	NRP	NRP generic	40.05	29
M39	Aegir_M39_B178	AIAADNBJ_15.region001	NRP	NRPS-like	15.13	11
M39	Aegir_M39_B178	AIAADNBJ_180.region001	Polyketide	T3PKS	21.11	13
M39	Aegir_M39_B178	AIAADNBJ_205.region001	Other	resorcinol	11.27	10
M39	Aegir_M39_B178	AIAADNBJ_43.region001	Terpene	Terpene generic	21.87	17
M39	Aegir_M39_B179	DCMKIBAL_70.region001	RiPP	RRE-containing	14.68	15
M39	Aegir_M39_B18	OGOLDCED_105.region001	RiPP	RRE-containing	12.44	14
M39	Aegir_M39_B18	OGOLDCED_116.region001	Other	arylpolyene	20.3	15
M39	Aegir_M39_B18	OGOLDCED_13.region001	Other	arylpolyene	23.48	22
M39	Aegir_M39_B18	OGOLDCED_26.region001	Other	resorcinol	19.86	18
M39	Aegir_M39_B18	OGOLDCED_79.region001	Other	acyl_amino_acids	28.68	27
M39	Aegir_M39_B180	PILMEDLM_25.region001	RiPP	RiPP-like	11.73	7
M39	Aegir_M39_B180	PILMEDLM_183.region001	Other	hydrogen-cyanide	8.42	7
M39	Aegir_M39_B180	PILMEDLM_80.region001	RiPP	RiPP-like	11.76	9
M39	Aegir_M39_B181	FNBCNFFH_185.region001	RiPP	RiPP-like	10.87	8
M39	Aegir_M39_B181	FNBCNFFH_18.region001	Other	arylpolyene	23.43	19
M39	Aegir_M39_B181	FNBCNFFH_221.region001	Polyketide	hglE-KS	30.17	21
M39	Aegir_M39_B181	FNBCNFFH_267.region001	Hybrid	hydrogen-cyanide:T3PKS	54.42	47
M39	Aegir_M39_B181	FNBCNFFH_320.region001	Terpene	Terpene generic	26.52	16
M39	Aegir_M39_B181	FNBCNFFH_51.region001	Other	arylpolyene	42.57	38
M39	Aegir_M39_B182	LIPJKAHJ_33.region001	Other	hserlactone	20.67	20
M39	Aegir_M39_B182	LIPJKAHJ_11.region001	Terpene	Terpene generic	14.27	14
M39	Aegir_M39_B182	LIPJKAHJ_36.region001	RiPP	RiPP-like	10.86	12
M39	Aegir_M39_B182	LIPJKAHJ_67.region001	Other	hserlactone	20.59	25
M39	Aegir_M39_B183	CBIJBIGH_173.region001	Terpene	Terpene generic	8.82	8
M39	Aegir_M39_B183	CBIJBIGH_190.region001	RiPP	ranthipeptide	11.06	9
M39	Aegir_M39_B183	CBIJBIGH_198.region001	Other	betalactone	17.66	16
M39	Aegir_M39_B183	CBIJBIGH_4.region001	RiPP	RiPP-like	8.43	6
M39	Aegir_M39_B184	EDPJEEBL_131.region001	Other	hydrogen-cyanide	8.72	5
M39	Aegir_M39_B185	BGKBPJDF_127.region001	NRP	NRP generic	19.34	6
M39	Aegir_M39_B185	BGKBPJDF_163.region001	NRP	NRPS-like	5.23	1
M39	Aegir_M39_B185	BGKBPJDF_304.region001	NRP	NRP generic	11.19	1
M39	Aegir_M39_B185	BGKBPJDF_357.region001	NRP	NRP generic	10.15	1
M39	Aegir_M39_B185	BGKBPJDF_369.region001	Terpene	Terpene generic	14.16	11
M39	Aegir_M39_B185	BGKBPJDF_47.region001	RiPP	RRE-containing	20.37	17
M39	Aegir_M39_B185	BGKBPJDF_51.region001	Hybrid	NRPS:T1PKS	26.23	7
M39	Aegir_M39_B185	BGKBPJDF_99.region001	Other	arylpolyene	5.49	3
M39	Aegir_M39_B186	JNBGNNLM_212.region001	Other	arylpolyene	10.64	8
M39	Aegir_M39_B186	JNBGNNLM_229.region001	RiPP	RiPP-like	10.85	10
M39	Aegir_M39_B186	JNBGNNLM_315.region001	RiPP	RiPP-like	5.42	6
M39	Aegir_M39_B186	JNBGNNLM_361.region001	Other	arylpolyene	7.02	8
M39	Aegir_M39_B186	JNBGNNLM_215.region001	Terpene	Terpene generic	2.32	2
M39	Aegir_M39_B186	JNBGNNLM_104.region001	Terpene	Terpene generic	9.35	5
M39	Aegir_M39_B187	KKKOIOLA_34.region001	RiPP	RRE-containing	19.47	19
M39	Aegir_M39_B188	JCKFNMMM_145.region001	Other	arylpolyene	12.25	15
M39	Aegir_M39_B188	JCKFNMMM_162.region001	Terpene	Terpene generic	18.39	16
M39	Aegir_M39_B188	JCKFNMMM_165.region001	Polyketide	T1PKS	26.05	16
M39	Aegir_M39_B188	JCKFNMMM_185.region001	RiPP	RRE-containing	8.58	7
M39	Aegir_M39_B188	JCKFNMMM_191.region001	RiPP	RRE-containing	13.47	11
M39	Aegir_M39_B188	JCKFNMMM_25.region001	RiPP	ranthipeptide	12.77	10
M39	Aegir_M39_B188	JCKFNMMM_262.region001	RiPP	RiPP-like	10.86	11
M39	Aegir_M39_B188	JCKFNMMM_283.region001	RiPP	RRE-containing	19.58	12
M39	Aegir_M39_B188	JCKFNMMM_332.region001	Terpene	Terpene generic	16	13
M39	Aegir_M39_B188	JCKFNMMM_340.region001	Polyketide	HR-T2PKS	19.86	17
M39	Aegir_M39_B19	JNHAIHPN_149.region001	Other	arylpolyene	38.41	27
M39	Aegir_M39_B19	JNHAIHPN_165.region001	Other	arylpolyene	26.61	21
M39	Aegir_M39_B19	JNHAIHPN_184.region001	Other	acyl_amino_acids	16.48	13
M39	Aegir_M39_B19	JNHAIHPN_4.region001	Other	ladderane	8.49	6
M39	Aegir_M39_B19	JNHAIHPN_96.region001	Other	arylpolyene	16.17	17
M39	Aegir_M39_B190	BOGPHCML_86.region001	RiPP	RiPP-like	10.85	11
M39	Aegir_M39_B190	BOGPHCML_104.region001	RiPP	RiPP-like	10.95	12
M39	Aegir_M39_B191	EEGHMLPD_225.region001	NRP	NRPS-like	9.82	11
M39	Aegir_M39_B191	EEGHMLPD_256.region001	Terpene	Terpene generic	14.86	11
M39	Aegir_M39_B191	EEGHMLPD_89.region001	RiPP	redox-cofactor	11.34	13
M39	Aegir_M39_B191	EEGHMLPD_38.region001	RiPP	RiPP-like	3.38	5
M39	Aegir_M39_B192	HEEDOPCH_142.region001	Other	hydrogen-cyanide	12.8	12
M39	Aegir_M39_B192	HEEDOPCH_110.region001	Terpene	Terpene generic	16.47	12
M39	Aegir_M39_B192	HEEDOPCH_120.region001	NRP	NRP generic	43.82	26
M39	Aegir_M39_B192	HEEDOPCH_18.region001	RiPP	RiPP-like	8.63	8
M39	Aegir_M39_B192	HEEDOPCH_56.region001	RiPP	redox-cofactor	22.13	22
M39	Aegir_M39_B192	HEEDOPCH_64.region001	RiPP	RiPP-like	6.03	5
M39	Aegir_M39_B192	HEEDOPCH_11.region001	Other	arylpolyene	7.6	7
M39	Aegir_M39_B192	HEEDOPCH_161.region001	RiPP	RiPP-like	6.82	7
M39	Aegir_M39_B193	IPACGEIK_1.region001	Other	2-dos aminoglycoside	21.06	23
M39	Aegir_M39_B194	MHOBFLEE_163.region001	RiPP	RiPP-like	2.56	3
M39	Aegir_M39_B194	MHOBFLEE_164.region001	RiPP	RiPP-like	3.06	2
M39	Aegir_M39_B194	MHOBFLEE_173.region001	RiPP	RRE-containing	3.93	4
M39	Aegir_M39_B194	MHOBFLEE_233.region001	Polyketide	hglE-KS	8.45	3
M39	Aegir_M39_B194	MHOBFLEE_241.region001	RiPP	RRE-containing	8.19	8
M39	Aegir_M39_B194	MHOBFLEE_398.region001	Polyketide	T1PKS	10.42	4
M39	Aegir_M39_B195	GJNOLOFI_12.region001	Other	arylpolyene	11.96	11
M39	Aegir_M39_B195	GJNOLOFI_142.region001	Other	arylpolyene	39.2	37
M39	Aegir_M39_B195	GJNOLOFI_209.region001	RiPP	RiPP-like	8.06	7
M39	Aegir_M39_B195	GJNOLOFI_238.region001	RiPP	RiPP-like	8.36	5
M39	Aegir_M39_B195	GJNOLOFI_270.region001	RiPP	ranthipeptide	4.05	3
M39	Aegir_M39_B195	GJNOLOFI_271.region001	RiPP	RRE-containing	3.47	4
M39	Aegir_M39_B195	GJNOLOFI_296.region001	RiPP	RRE-containing	11.37	12
M39	Aegir_M39_B195	GJNOLOFI_380.region001	RiPP	RRE-containing	10.82	9
M39	Aegir_M39_B195	GJNOLOFI_416.region001	Terpene	Terpene generic	8.48	7
M39	Aegir_M39_B195	GJNOLOFI_420.region001	Other	arylpolyene	17.19	19
M39	Aegir_M39_B195	GJNOLOFI_98.region001	RiPP	RiPP-like	9.71	8
M39	Aegir_M39_B196	BKLBJKCE_188.region001	Other	arylpolyene	13.43	14
M39	Aegir_M39_B196	BKLBJKCE_190.region001	Other	hydrogen-cyanide	13.23	7
M39	Aegir_M39_B196	BKLBJKCE_20.region001	Polyketide	T1PKS	8.76	4
M39	Aegir_M39_B196	BKLBJKCE_217.region001	RiPP	RiPP-like	11.9	8
M39	Aegir_M39_B196	BKLBJKCE_24.region001	RiPP	RRE-containing	7.18	8
M39	Aegir_M39_B196	BKLBJKCE_255.region001	Terpene	Terpene generic	12.94	13
M39	Aegir_M39_B196	BKLBJKCE_300.region001	Other	arylpolyene	25.74	25
M39	Aegir_M39_B196	BKLBJKCE_315.region001	Terpene	Terpene generic	5.58	6
M39	Aegir_M39_B196	BKLBJKCE_397.region001	Other	hydrogen-cyanide	8.17	7
M39	Aegir_M39_B198	OHIALCHJ_181.region001	Other	betalactone	30.09	22
M39	Aegir_M39_B198	OHIALCHJ_57.region001	Hybrid	arylpolyene:resorcinol	52.88	38
M39	Aegir_M39_B198	OHIALCHJ_63.region001	RiPP	RRE-containing	20.25	15
M39	Aegir_M39_B199	KEIMIPLH_314.region001	RiPP	RRE-containing	13.62	13
M39	Aegir_M39_B199	KEIMIPLH_50.region001	RiPP	RiPP-like	4.96	3
M39	Aegir_M39_B2	GFCMJPMJ_114.region001	RiPP	RiPP-like	9.52	8
M39	Aegir_M39_B2	GFCMJPMJ_14.region001	Other	arylpolyene	7.94	11
M39	Aegir_M39_B2	GFCMJPMJ_188.region001	Other	arylpolyene	7.19	9
M39	Aegir_M39_B2	GFCMJPMJ_69.region001	Other	resorcinol	6.42	7
M39	Aegir_M39_B20	KNGHPBFF_123.region001	Other	arylpolyene	4.94	6
M39	Aegir_M39_B20	KNGHPBFF_139.region001	Hybrid	NRPS:T1PKS	19.34	3
M39	Aegir_M39_B20	KNGHPBFF_13.region001	NRP	NRP generic	5.28	1
M39	Aegir_M39_B20	KNGHPBFF_250.region001	Polyketide	T3PKS	10.31	9
M39	Aegir_M39_B20	KNGHPBFF_308.region001	NRP	NRP generic	13.5	1
M39	Aegir_M39_B20	KNGHPBFF_318.region001	NRP	NRP generic	9	5
M39	Aegir_M39_B20	KNGHPBFF_375.region001	NRP	NRP generic	5.96	4
M39	Aegir_M39_B20	KNGHPBFF_385.region001	RiPP	lanthipeptide	7.09	3
M39	Aegir_M39_B20	KNGHPBFF_415.region001	Other	resorcinol	6.01	6
M39	Aegir_M39_B20	KNGHPBFF_475.region001	NRP	NRP generic	6.55	1
M39	Aegir_M39_B20	KNGHPBFF_550.region001	NRP	NRP generic	3.6	1
M39	Aegir_M39_B20	KNGHPBFF_90.region001	NRP	NRP generic	17.53	2
M39	Aegir_M39_B20	KNGHPBFF_204.region001	RiPP	lanthipeptide	7.6	3
M39	Aegir_M39_B20	KNGHPBFF_356.region001	Other	arylpolyene	16.12	15
M39	Aegir_M39_B20	KNGHPBFF_25.region001	RiPP	RiPP-like	8.06	8
M39	Aegir_M39_B20	KNGHPBFF_508.region001	Polyketide	T3PKS	8.04	12
M39	Aegir_M39_B20	KNGHPBFF_228.region001	RiPP	microviridin	12.38	13
M39	Aegir_M39_B20	KNGHPBFF_333.region001	Terpene	Terpene generic	13.57	16
M39	Aegir_M39_B21	OONNNJMN_291.region001	RiPP	RRE-containing	3.02	2
M39	Aegir_M39_B23	CIBCBEEE_109.region001	RiPP	RiPP-like	7.07	7
M39	Aegir_M39_B23	CIBCBEEE_111.region001	NRP	NRPS-like	18.64	12
M39	Aegir_M39_B23	CIBCBEEE_122.region001	Terpene	Terpene generic	10.8	7
M39	Aegir_M39_B23	CIBCBEEE_156.region001	Other	hydrogen-cyanide	12.8	8
M39	Aegir_M39_B23	CIBCBEEE_22.region001	RiPP	redox-cofactor	11.78	13
M39	Aegir_M39_B23	CIBCBEEE_91.region001	Hybrid	NRPS-like:arylpolyene	31.02	27
M39	Aegir_M39_B24	MINEOLEI_165.region001	Terpene	Terpene generic	3.31	5
M39	Aegir_M39_B24	MINEOLEI_324.region001	RiPP	RiPP-like	8.53	12
M39	Aegir_M39_B24	MINEOLEI_230.region001	Other	hserlactone	15.21	15
M39	Aegir_M39_B25	IAPKAMMO_109.region001	Polyketide	T1PKS	9.57	2
M39	Aegir_M39_B25	IAPKAMMO_130.region001	NRP	NRP generic	2.49	1
M39	Aegir_M39_B25	IAPKAMMO_162.region001	Other	acyl_amino_acids	3.29	2
M39	Aegir_M39_B25	IAPKAMMO_177.region001	Polyketide	T3PKS	24.12	21
M39	Aegir_M39_B25	IAPKAMMO_248.region001	Other	acyl_amino_acids	14.71	15
M39	Aegir_M39_B25	IAPKAMMO_310.region001	Other	acyl_amino_acids	2.5	2
M39	Aegir_M39_B25	IAPKAMMO_313.region001	NRP	NRPS-like	7.67	4
M39	Aegir_M39_B25	IAPKAMMO_326.region001	NRP	NRP generic	10.5	2
M39	Aegir_M39_B25	IAPKAMMO_354.region001	Other	acyl_amino_acids	21.73	16
M39	Aegir_M39_B25	IAPKAMMO_357.region001	Other	acyl_amino_acids	24.65	25
M39	Aegir_M39_B25	IAPKAMMO_56.region001	Terpene	Terpene generic	19.66	20
M39	Aegir_M39_B25	IAPKAMMO_74.region001	NRP	NRP generic	6.27	2
M39	Aegir_M39_B25	IAPKAMMO_81.region001	Other	acyl_amino_acids	15.65	11
M39	Aegir_M39_B25	IAPKAMMO_89.region001	Other	acyl_amino_acids	15.01	13
M39	Aegir_M39_B25	IAPKAMMO_61.region001	Hybrid	lassopeptide:RRE-containing	9.26	9
M39	Aegir_M39_B25	IAPKAMMO_161.region001	Other	acyl_amino_acids	9.83	9
M39	Aegir_M39_B25	IAPKAMMO_220.region001	Other	acyl_amino_acids	5.37	4
M39	Aegir_M39_B25	IAPKAMMO_17.region001	Other	acyl_amino_acids	13.35	12
M39	Aegir_M39_B25	IAPKAMMO_312.region001	RiPP	RRE-containing	15.82	15
M39	Aegir_M39_B25	IAPKAMMO_148.region001	Other	acyl_amino_acids	3.67	3
M39	Aegir_M39_B25	IAPKAMMO_206.region001	Other	acyl_amino_acids	3.97	2
M39	Aegir_M39_B25	IAPKAMMO_165.region001	Other	acyl_amino_acids	2.9	2
M39	Aegir_M39_B26	PODDHOJH_222.region001	Other	nucleoside	13.41	10
M39	Aegir_M39_B27	INCGMNIA_224.region001	RiPP	RRE-containing	5.23	6
M39	Aegir_M39_B27	INCGMNIA_59.region001	RiPP	RRE-containing	3.62	7
M39	Aegir_M39_B29	LDFDGFAA_173.region001	NRP	NRPS-like	2.33	3
M39	Aegir_M39_B29	LDFDGFAA_263.region001	NRP	NRP generic	10.16	2
M39	Aegir_M39_B29	LDFDGFAA_541.region001	NRP	NRPS-like	2.94	1
M39	Aegir_M39_B29	LDFDGFAA_640.region001	NRP	NRP generic	5.53	2
M39	Aegir_M39_B29	LDFDGFAA_706.region001	Other	betalactone	13.43	11
M39	Aegir_M39_B29	LDFDGFAA_71.region001	NRP	NRPS-like	2.41	1
M39	Aegir_M39_B29	LDFDGFAA_732.region001	NRP	NRP generic	2.04	1
M39	Aegir_M39_B29	LDFDGFAA_24.region001	Terpene	Terpene generic	5.08	4
M39	Aegir_M39_B29	LDFDGFAA_224.region001	RiPP	RRE-containing	2	3
M39	Aegir_M39_B3	OHFHPIDA_203.region001	Hybrid	PUFA:T1PKS	28.39	18
M39	Aegir_M39_B3	OHFHPIDA_266.region001	Terpene	Terpene generic	11.98	10
M39	Aegir_M39_B3	OHFHPIDA_75.region001	RiPP	RRE-containing	13.67	10
M39	Aegir_M39_B30	HOCLGGFK_132.region001	RiPP	RiPP-like	7.89	9
M39	Aegir_M39_B30	HOCLGGFK_111.region001	RiPP	RRE-containing	20.24	16
M39	Aegir_M39_B30	HOCLGGFK_34.region001	NRP	NRPS-like	9.98	11
[truncated: 967 more rows]
