# Supplementary material for: Remarkable biosynthetic capacity of Arctic hydrothermal biofilms
Source: Research Square preprint supplement (doi:10.21203/rs.3.rs-7619139/v1), 2025-09-29
Supplement: Supplementary file 2 [file 4ee0ea7c079345f7dbc44e27.xlsx]

## Sheet: Supplementary Table 4
Supplementary Table 5: Expression profiles of BGCs across seven biofilms from Arctic deep-sea hydrothermal vents.
The table includes normalized transcript abundance for each BGC, along with associated metadata such as BGC class, predicted product, and taxonomic affiliation.
Metagenome_ID	MAG_ID	BGC_ID	BGC_class	Predicted_product	coreRPKM	TPM	lg(TPM)	Domain	Phylum	Class	Order	Family	Genus	Species
M39	Aegir_M39_B25	IAPKAMMO_161.region001	Other	acyl_amino_acids	169.003	2104.43	3.32313	Bacteria	Planctomycetota	JADGBV01	JADGBV01	JADGBV01
M39	Aegir_M39_B25	IAPKAMMO_17.region001	Other	acyl_amino_acids	124.411	1549.16	3.1901	Bacteria	Planctomycetota	JADGBV01	JADGBV01	JADGBV01
M39	Aegir_M39_B25	IAPKAMMO_248.region001	Other	acyl_amino_acids	225.912	2813.06	3.44918	Bacteria	Planctomycetota	JADGBV01	JADGBV01	JADGBV01
M39	Aegir_M39_B25	IAPKAMMO_354.region001	Other	acyl_amino_acids	152.867	1903.51	3.27955	Bacteria	Planctomycetota	JADGBV01	JADGBV01	JADGBV01
M39	Aegir_M39_B25	IAPKAMMO_89.region001	Other	acyl_amino_acids	110.646	1377.77	3.13918	Bacteria	Planctomycetota	JADGBV01	JADGBV01	JADGBV01
M39	Aegir_M39_B18	OGOLDCED_79.region001	Other	acyl_amino_acids	57.9134	721.14	2.85802	Bacteria	Bacteroidota	Bacteroidia	Bacteroidales	JAADGE01	JAADGE01
M33	Barite_M33_B6	LPIDFHMF_74.region001	Hybrid	acyl_amino_acids:betalactone	106.916	1096.28	3.03992	Bacteria	Pseudomonadota	Gammaproteobacteria	Methylococcales	Methylomonadaceae	QPIN01
M24	Aegir_M24_B113	NEOEDNCB_12.region001	Other	arylpolyene	776.282	13947.8	4.14451	Bacteria	Bacteroidota	Bacteroidia	Flavobacteriales	Flavobacteriaceae	S010-17
M24	Aegir_M24_B92	NJPCPLPI_182.region001	Other	arylpolyene	235.275	4227.31	3.62606	Bacteria	Bacteroidota	Bacteroidia	Flavobacteriales	PHOS-HE28
M24	Aegir_M24_B62	OOCMFLME_120.region001	Other	arylpolyene	219.514	3944.11	3.59595	Bacteria	Pseudomonadota	Gammaproteobacteria	Methylococcales	Methylomonadaceae	QPIN01
M25	Aegir_M25_B40	EJKDLJJF_202.region001	Other	arylpolyene	11443.5	95681.9	4.98083	Bacteria	Bacteroidota	Bacteroidia	Flavobacteriales	Flavobacteriaceae	Lutimonas
M36	Aegir_M36_B48	IGGOJNFL_15.region001	Other	arylpolyene	6744.27	47104.6	4.67306	Bacteria	Campylobacterota	Campylobacteria	Campylobacterales	Sulfurospirillaceae	Sulfurospirillum_A
M36	Aegir_M36_B71	JGCHBLFO_296.region001	Other	arylpolyene	5526.17	38597	4.58655	Bacteria	Pseudomonadota	Gammaproteobacteria	Methylococcales	Methylomonadaceae	Methylomarinum
M36	Aegir_M36_B40	MACFFGIF_121.region001	Other	arylpolyene	2236.02	15617.2	4.1936	Bacteria	Pseudomonadota	Gammaproteobacteria	Methylococcales	Methylomonadaceae	Methyloprofundus
M37	Aegir_M37_B35	CJICECBE_42.region001	Other	arylpolyene	14087.7	104497	5.01911	Bacteria	Bacteroidota	Bacteroidia	Flavobacteriales	Flavobacteriaceae	Lutimonas
M38	Aegir_M38_B66	EMLCJMHO_94.region001	Other	arylpolyene	915.188	13622.6	4.13426	Bacteria	Desulfobacterota	Desulfobulbia	Desulfobulbales	Desulfurivibrionaceae
M38	Aegir_M38_B72	JLHIKFCN_96.region001	Other	arylpolyene	1155.8	17204.1	4.23563	Bacteria	Pseudomonadota	Gammaproteobacteria	Methylococcales	Methylomonadaceae	WTBX01
M38	Aegir_M38_B91	KMNIKALC_139.region001	Other	arylpolyene	872.683	12989.9	4.1136	Bacteria	Pseudomonadota	Zetaproteobacteria	Mariprofundales	Mariprofundaceae	GCA-2401635
M38	Aegir_M38_B21	NIMPLCKH_11.region001	Other	arylpolyene	86.8493	1292.75	3.11151	Bacteria	Pseudomonadota	Gammaproteobacteria	Methylococcales	Methylomonadaceae	QPIN01
M38	Aegir_M38_B101	OPDMMHKB_26.region001	Other	arylpolyene	88.3233	1314.69	3.11882	Bacteria	Pseudomonadota	Gammaproteobacteria	Enterobacterales_A	Kangiellaceae	GCA-002733465
M39	Aegir_M39_B196	BKLBJKCE_188.region001	Other	arylpolyene	123.697	1540.28	3.1876	Bacteria	Desulfobacterota	Desulfobacteria	Desulfobacterales	JAABRJ01
M39	Aegir_M39_B82	DMCDPPBI_182.region001	Other	arylpolyene	278.807	3471.71	3.54054	Bacteria	Desulfobacterota	Desulfobulbia	Desulfobulbales	Desulfocapsaceae	Desulforhopalus
M39	Aegir_M39_B149	EDJGDHEF_49.region001	Other	arylpolyene	536.541	6681.02	3.82484	Bacteria	Pseudomonadota	Gammaproteobacteria	Methylococcales	Methylomonadaceae	Methylomarinum
M39	Aegir_M39_B181	FNBCNFFH_51.region001	Other	arylpolyene	39.0239	485.927	2.68657	Bacteria	Myxococcota	Polyangia	Polyangiales	SG8-38	JAADHO01
M39	Aegir_M39_B100	HPDNPIEA_257.region001	Other	arylpolyene	180.754	2250.76	3.35233	Bacteria	Myxococcota	B64-G9	B64-G9	B64-G9
M39	Aegir_M39_B100	HPDNPIEA_481.region001	Other	arylpolyene	161.951	2016.62	3.30462	Bacteria	Myxococcota	B64-G9	B64-G9	B64-G9
M39	Aegir_M39_B60	IGDGJELM_65.region001	Other	arylpolyene	39.409	490.723	2.69084	Bacteria	Myxococcota	B64-G9	B64-G9	B64-G9
M39	Aegir_M39_B19	JNHAIHPN_96.region001	Other	arylpolyene	102.755	1279.5	3.10704	Bacteria	Verrucomicrobiota	Kiritimatiellia	UBA8416	JAFGTH01
M39	Aegir_M39_B20	KNGHPBFF_356.region001	Other	arylpolyene	103.061	1283.31	3.10833	Bacteria	Bacteroidota	Bacteroidia	Flavobacteriales	Crocinitomicaceae	Crocinitomix
M39	Aegir_M39_B119	MHCCPFAL_130.region001	Other	arylpolyene	129.644	1614.33	3.20799	Bacteria	Pseudomonadota	Gammaproteobacteria	Methylococcales	Methylomonadaceae	QPIN01
M39	Aegir_M39_B126	NGIDNPEH_9.region001	Other	arylpolyene	40.2864	501.648	2.7004	Bacteria	Desulfobacterota	DSM-4660	Desulfatiglandales	Desulfatiglandaceae	JAGGTJ01
M39	Aegir_M39_B55	NLFFCBIA_47.region001	Other	arylpolyene	64.5676	803.998	2.90525	Bacteria	Pseudomonadota	Gammaproteobacteria	Methylococcales	Methylomonadaceae	QPIN01
M39	Aegir_M39_B39	NPMBOLIF_107.region001	Other	arylpolyene	65.2524	812.525	2.90984	Bacteria	Myxococcota_A	UBA9160	UBA9160	UBA4427	UBA4427
M39	Aegir_M39_B18	OGOLDCED_13.region001	Other	arylpolyene	70.7436	880.902	2.94493	Bacteria	Bacteroidota	Bacteroidia	Bacteroidales	JAADGE01	JAADGE01
M39	Aegir_M39_B146	OICIJIOO_87.region001	Other	arylpolyene	126.636	1576.88	3.1978	Bacteria	Pseudomonadota	Gammaproteobacteria	Methylococcales	Methylomonadaceae
M39	Aegir_M39_B13	OPIOGPAO_16.region001	Other	arylpolyene	40.3716	502.709	2.70132	Bacteria	Bacteroidota	Bacteroidia	Flavobacteriales	Crocinitomicaceae	Putridiphycobacter
M39	Aegir_M39_B77	PCIMOJGB_111.region001	Other	arylpolyene	43.4078	540.516	2.73281	Bacteria	Bacteroidota	Bacteroidia	Bacteroidales	UBA1556	QNXT01
M39	Aegir_M39_B31	POFLEAAM_250.region001	Other	arylpolyene	573.991	7147.36	3.85415	Bacteria	Bacteroidota	Bacteroidia	Bacteroidales	F082	B16-G9
M33	Barite_M33_B31	ALBGKPPL_355.region001	Other	arylpolyene	199.845	2049.14	3.31157	Bacteria	Pseudomonadota	Gammaproteobacteria	Enterobacterales	Kangiellaceae	GCA-002733465
M33	Barite_M33_B55	CFPHHOAB_101.region001	Other	arylpolyene	419.674	4303.2	3.63379	Bacteria	Bdellovibrionota	Bdellovibrionia	Bdellovibrionales	JAGQZY01	JAGQZY01
M33	Barite_M33_B30	COHBHEGN_38.region001	Other	arylpolyene	301.119	3087.57	3.48962	Bacteria	Bacteroidota	Bacteroidia	Flavobacteriales	Flavobacteriaceae	Urechidicola
M33	Barite_M33_B97	FAPGKHBG_56.region001	Other	arylpolyene	207.074	2123.27	3.327	Bacteria	Pseudomonadota	Gammaproteobacteria	Xanthomonadales	Marinicellaceae	NORP309
M33	Barite_M33_B69	FHIEFOOH_136.region001	Other	arylpolyene	145.121	1488.02	3.17261	Bacteria	Pseudomonadota	Gammaproteobacteria	Arenicellales	Arenicellaceae	Arenicella	Arenicella sp016763815
M33	Barite_M33_B69	FHIEFOOH_192.region001	Other	arylpolyene	111.415	1142.41	3.05782	Bacteria	Pseudomonadota	Gammaproteobacteria	Arenicellales	Arenicellaceae	Arenicella	Arenicella sp016763815
M33	Barite_M33_B114	HJEFFHPK_141.region001	Other	arylpolyene	256.491	2629.97	3.41995	Bacteria	Pseudomonadota	Gammaproteobacteria	SZUA-229	SZUA-229	GCA-2746365
M33	Barite_M33_B23	JICMBPMM_39.region001	Other	arylpolyene	311.493	3193.95	3.50433	Bacteria	Pseudomonadota	Gammaproteobacteria	Methylococcales	Methylomonadaceae	WTBX01
M33	Barite_M33_B112	NPLDDKJN_692.region001	Other	arylpolyene	192.75	1976.39	3.29587	Bacteria	Bacteroidota	Bacteroidia	Cytophagales	Cyclobacteriaceae	Reichenbachiella
M33	Barite_M33_B30	COHBHEGN_65.region001	Hybrid	arylpolyene:betalactone:resorcinol	395.583	4056.17	3.60812	Bacteria	Bacteroidota	Bacteroidia	Flavobacteriales	Flavobacteriaceae	Urechidicola
M24	Aegir_M24_B26	BLIMOGOC_29.region001	Hybrid	arylpolyene:resorcinol	254.978	4581.32	3.66099	Bacteria	Bacteroidota	Bacteroidia	Flavobacteriales	Flavobacteriaceae	GCA-002733185
M24	Aegir_M24_B10	BPIAAOIK_41.region001	Hybrid	arylpolyene:resorcinol	275.492	4949.9	3.6946	Bacteria	Bacteroidota	Bacteroidia	Flavobacteriales	Salibacteraceae	CAJXZP01
M24	Aegir_M24_B113	NEOEDNCB_47.region001	Hybrid	arylpolyene:resorcinol	219.977	3952.43	3.59686	Bacteria	Bacteroidota	Bacteroidia	Flavobacteriales	Flavobacteriaceae	S010-17
M24	Aegir_M24_B88	OBCMDBHP_62.region001	Hybrid	arylpolyene:resorcinol	304.564	5472.26	3.73817	Bacteria	Bacteroidota	Bacteroidia	Flavobacteriales	Flavobacteriaceae	Lutimonas
M25	Aegir_M25_B130	EMAHDGMJ_79.region001	Hybrid	arylpolyene:resorcinol	864.363	7227.16	3.85897	Bacteria	Bacteroidota	Bacteroidia	Flavobacteriales	Salibacteraceae	CAJXZP01
M36	Aegir_M36_B24	DHGLLEPI_171.region001	Hybrid	arylpolyene:resorcinol	328.93	2297.38	3.36123	Bacteria	Bacteroidota	Bacteroidia	Flavobacteriales	Salibacteraceae	CAJXZP01
M36	Aegir_M36_B59	LBFMECOL_22.region001	Hybrid	arylpolyene:resorcinol	557.083	3890.88	3.59005	Bacteria	Bacteroidota	Bacteroidia	Flavobacteriales	Flavobacteriaceae	S010-17
M36	Aegir_M36_B62	NDIICOJF_10.region002	Hybrid	arylpolyene:resorcinol	405.358	2831.18	3.45197	Bacteria	Bacteroidota	Bacteroidia	Bacteroidales	UBA12170	UBA12170
M36	Aegir_M36_B54	NEFIDIMH_10.region001	Hybrid	arylpolyene:resorcinol	556.399	3886.11	3.58952	Bacteria	Bacteroidota	Bacteroidia	Flavobacteriales	Flavobacteriaceae	Lutimonas
M37	Aegir_M37_B36	HECOAHAK_45.region001	Hybrid	arylpolyene:resorcinol	1705.44	12650.3	4.1021	Bacteria	Bacteroidota	Bacteroidia	Flavobacteriales	Flavobacteriaceae	Lutimonas
M38	Aegir_M38_B25	CIGBJIDC_43.region001	Hybrid	arylpolyene:resorcinol	72.0895	1073.05	3.03062	Bacteria	Bacteroidota	Bacteroidia	Flavobacteriales	Crocinitomicaceae	UBA4466
M38	Aegir_M38_B66	EMLCJMHO_126.region001	Hybrid	arylpolyene:resorcinol	763.467	11364.2	4.05554	Bacteria	Desulfobacterota	Desulfobulbia	Desulfobulbales	Desulfurivibrionaceae
M38	Aegir_M38_B92	HJJGMEJB_43.region001	Hybrid	arylpolyene:resorcinol	59.6326	887.631	2.94823	Bacteria	Campylobacterota	Campylobacteria	Campylobacterales	Sulfurimonadaceae	Sulfurimonas
M38	Aegir_M38_B77	IEOKNLIK_64.region001	Hybrid	arylpolyene:resorcinol	1675.25	24936.1	4.39683	Bacteria	Campylobacterota	Campylobacteria	Campylobacterales	Sulfurimonadaceae	Sulfurimonas
M38	Aegir_M38_B31	JEMMGIEH_106.region001	Hybrid	arylpolyene:resorcinol	249.979	3720.93	3.57065	Bacteria	Bacteroidota	Bacteroidia	Flavobacteriales	Flavobacteriaceae	Urechidicola
M38	Aegir_M38_B89	KDNKGBAB_28.region001	Hybrid	arylpolyene:resorcinol	68.3342	1017.15	3.00739	Bacteria	Bacteroidota	Bacteroidia	Flavobacteriales	Crocinitomicaceae	UBA4466
M39	Aegir_M39_B5	CBKCKAFE_11.region001	Hybrid	arylpolyene:resorcinol	379.658	4727.51	3.67463	Bacteria	Bacteroidota	Bacteroidia	Flavobacteriales	Flavobacteriaceae	S010-17
M39	Aegir_M39_B177	DPONBGFN_110.region001	Hybrid	arylpolyene:resorcinol	471.006	5864.99	3.76827	Bacteria	Bacteroidota	Bacteroidia	Flavobacteriales	Salibacteraceae	CAJXZP01
M39	Aegir_M39_B67	HCGIIHJE_5.region001	Hybrid	arylpolyene:resorcinol	445.93	5552.74	3.74451	Bacteria	Bacteroidota	Bacteroidia	Flavobacteriales	Flavobacteriaceae	S010-17
M39	Aegir_M39_B136	IGJLCKIK_38.region001	Hybrid	arylpolyene:resorcinol	106.228	1322.76	3.12148	Bacteria	Bacteroidota	Bacteroidia	Bacteroidales	F082	UBA4459
M39	Aegir_M39_B136	IGJLCKIK_8.region001	Hybrid	arylpolyene:resorcinol	169.934	2116.03	3.32552	Bacteria	Bacteroidota	Bacteroidia	Bacteroidales	F082	UBA4459
M39	Aegir_M39_B121	JGGEIKLM_65.region001	Hybrid	arylpolyene:resorcinol	339.788	4231.05	3.62645	Bacteria	Bacteroidota	Bacteroidia	Flavobacteriales	Flavobacteriaceae	GCA-002733185
M39	Aegir_M39_B137	MGGLONMC_3.region001	Hybrid	arylpolyene:resorcinol	1086.03	13523.3	4.13108	Bacteria	Bacteroidota	Bacteroidia	Flavobacteriales	Flavobacteriaceae	Lutimonas
M39	Aegir_M39_B126	NGIDNPEH_5.region001	Hybrid	arylpolyene:resorcinol	68.7397	855.95	2.93245	Bacteria	Desulfobacterota	DSM-4660	Desulfatiglandales	Desulfatiglandaceae	JAGGTJ01
M39	Aegir_M39_B198	OHIALCHJ_57.region001	Hybrid	arylpolyene:resorcinol	31.4108	391.129	2.59232	Bacteria	Bacteroidota	Bacteroidia	Cytophagales	Cyclobacteriaceae
M33	Barite_M33_B56	ENICKNPH_42.region001	Hybrid	arylpolyene:resorcinol	56.4099	578.408	2.76223	Bacteria	Bacteroidota	Bacteroidia	Flavobacteriales	Flavobacteriaceae	Lutimonas
M36	Aegir_M36_B34	CHHKDDGB_23.region001	Other	betalactone	618.635	4320.79	3.63556	Bacteria	Myxococcota	UBA796	UBA796	CAJQPC01	CAJQPC01
M36	Aegir_M36_B64	GKCHABDB_67.region001	Other	betalactone	641.141	4477.98	3.65108	Bacteria	Myxococcota	UBA796	UBA796	GCA-2862545	JACKEQ01
M36	Aegir_M36_B63	OGCOFHCG_9.region001	Other	betalactone	757.513	5290.77	3.72352	Bacteria	Pseudomonadota	Gammaproteobacteria	Thiomicrospirales	Thiomicrospiraceae	Thiomicrorhabdus
M38	Aegir_M38_B104	ENCCGMIM_73.region001	Other	betalactone	116.602	1735.62	3.23945	Bacteria	Pseudomonadota	Alphaproteobacteria	Sphingomonadales	Emcibacteraceae	Paremcibacter
M39	Aegir_M39_B161	EACKFKNK_79.region001	Other	betalactone	116.493	1450.57	3.16154	Archaea	Halobacteriota	Archaeoglobi	Archaeoglobales	Archaeoglobaceae	Archaeoglobus_A
M39	Aegir_M39_B128	EBJAGHMO_62.region001	Other	betalactone	60.7649	756.647	2.87889	Bacteria	Pseudomonadota	Alphaproteobacteria	Rhodobacterales	Rhodobacteraceae	JAJRUE01
M39	Aegir_M39_B94	FNBAOPIA_73.region001	Other	betalactone	75.4922	940.031	2.97314	Bacteria	Spirochaetota	Spirochaetia	B11-G9	B11-G9	S145-15
M39	Aegir_M39_B94	FNBAOPIA_74.region001	Other	betalactone	68.0261	847.064	2.92792	Bacteria	Spirochaetota	Spirochaetia	B11-G9	B11-G9	S145-15
M39	Aegir_M39_B127	GNEJKKOJ_50.region001	Other	betalactone	97.0853	1208.91	3.08239	Bacteria	Pseudomonadota	Gammaproteobacteria	GCA-001735895	GCA-001735895	JACNJF01
M39	Aegir_M39_B117	IAKFMJEM_44.region001	Other	betalactone	1251.01	15577.6	4.1925	Bacteria	Pseudomonadota	Alphaproteobacteria	Rhodobacterales	Rhodobacteraceae	Roseovarius
M39	Aegir_M39_B109	ICBCKKKK_35.region001	Other	betalactone	385.637	4801.96	3.68142	Bacteria	Bacteroidota	Bacteroidia	Bacteroidales	JAADJA01	JAADJA01
M39	Aegir_M39_B136	IGJLCKIK_46.region001	Other	betalactone	335.277	4174.88	3.62064	Bacteria	Bacteroidota	Bacteroidia	Bacteroidales	F082	UBA4459
M39	Aegir_M39_B71	OEDHKPFD_97.region001	Other	betalactone	209.54	2609.2	3.41651	Bacteria	Pseudomonadota	Gammaproteobacteria	Methylococcales	Methylomonadaceae	QPIN01	QPIN01 sp021647585
M39	Aegir_M39_B198	OHIALCHJ_181.region001	Other	betalactone	55.2072	687.442	2.83724	Bacteria	Bacteroidota	Bacteroidia	Cytophagales	Cyclobacteriaceae
M39	Aegir_M39_B146	OICIJIOO_144.region001	Other	betalactone	368.52	4588.82	3.6617	Bacteria	Pseudomonadota	Gammaproteobacteria	Methylococcales	Methylomonadaceae
M33	Barite_M33_B92	MHCCMMMN_217.region001	Other	betalactone	104.284	1069.3	3.0291	Bacteria	Pseudomonadota	Gammaproteobacteria	Methylococcales	Methylomonadaceae	Methyloprofundus
M36	Aegir_M36_B45	KCAABIEO_245.region001	NRP	CDPS	1899.67	13268	4.12281	Bacteria	Bacteroidota	Bacteroidia	Cytophagales	Bernardetiaceae
M38	Aegir_M38_B73	GACEDKPE_108.region001	NRP	CDPS	448.39	6674.28	3.8244	Bacteria	Pseudomonadota	Gammaproteobacteria	Methylococcales	Methylomonadaceae
M33	Barite_M33_B23	JICMBPMM_86.region001	NRP	CDPS	1717.57	17611.4	4.24579	Bacteria	Pseudomonadota	Gammaproteobacteria	Methylococcales	Methylomonadaceae	WTBX01
M38	Aegir_M38_B19	ECPBKFON_90.region001	Other	ectoine	569.742	8480.6	3.92843	Bacteria	Pseudomonadota	Zetaproteobacteria	Mariprofundales	Mariprofundaceae	AB-137-C09
M39	Aegir_M39_B117	IAKFMJEM_55.region001	Other	ectoine	256.862	3198.46	3.50494	Bacteria	Pseudomonadota	Alphaproteobacteria	Rhodobacterales	Rhodobacteraceae	Roseovarius
M24	Aegir_M24_B66	ABLFJFHB_66.region001	Polyketide	hglE-KS	423.148	7602.92	3.88098	Bacteria	Bdellovibrionota	Oligoflexia	Oligoflexales
M24	Aegir_M24_B45	DPHDEEHI_103.region001	Polyketide	hglE-KS	140.582	2525.91	3.40242	Bacteria	Myxococcota	Bradymonadia	Bradymonadales	Bradymonadaceae	CALJNB01
M24	Aegir_M24_B45	DPHDEEHI_74.region001	Polyketide	hglE-KS	271.833	4884.16	3.68879	Bacteria	Myxococcota	Bradymonadia	Bradymonadales	Bradymonadaceae	CALJNB01
M24	Aegir_M24_B94	FBDIKMAG_101.region001	Polyketide	hglE-KS	90.1311	1619.43	3.20936	Bacteria	Pseudomonadota	Gammaproteobacteria	Pseudomonadales	Azotimanducaceae_A	JAHRVQ01
M24	Aegir_M24_B6	KKNDCODD_112.region001	Polyketide	hglE-KS	371.333	6671.92	3.82425	Bacteria	Bacteroidota	Bacteroidia	Chitinophagales	Saprospiraceae	CAJQQY01
M24	Aegir_M24_B103	PADGKGNB_119.region001	Polyketide	hglE-KS	349.928	6287.32	3.79847	Bacteria	Planctomycetota	UBA11346	UBA11346	UBA11346	JANQLF01
M36	Aegir_M36_B46	AODPIKDL_6.region001	Polyketide	hglE-KS	502.689	3510.98	3.54543	Bacteria	Myxococcota	UBA727	UBA727
M36	Aegir_M36_B2	NDAJAKLO_97.region001	Polyketide	hglE-KS	3033.77	21189	4.32611	Bacteria	Desulfobacterota	Desulfobacteria	Desulfobacterales	Desulfobacteraceae
M38	Aegir_M38_B76	BPOLMMFO_66.region001	Polyketide	hglE-KS	143.252	2132.3	3.32885	Bacteria	Myxococcota	Bradymonadia	UBA7976	UBA1532
M38	Aegir_M38_B19	ECPBKFON_70.region001	Polyketide	hglE-KS	1373.81	20449.2	4.31068	Bacteria	Pseudomonadota	Zetaproteobacteria	Mariprofundales	Mariprofundaceae	AB-137-C09
M38	Aegir_M38_B64	NAOKMLNH_95.region001	Polyketide	hglE-KS	451.216	6716.34	3.82713	Bacteria	Bdellovibrionota	Oligoflexia	Oligoflexales
M39	Aegir_M39_B99	AAIIPECO_23.region001	Polyketide	hglE-KS	91.0308	1133.52	3.05443	Bacteria	Desulfobacterota	Desulfobacteria	Desulfobacterales	Desulfosarcinaceae
M39	Aegir_M39_B79	ECMLGHLP_74.region001	Polyketide	hglE-KS	83.1355	1035.21	3.01503	Bacteria	Chloroflexota	Anaerolineae	JAFGEY01	JAFGEY01
M39	Aegir_M39_B120	EEAGJODL_216.region001	Polyketide	hglE-KS	45.3489	564.686	2.75181	Bacteria	Myxococcota	Bradymonadia	Bradymonadales	Bradymonadaceae
M39	Aegir_M39_B181	FNBCNFFH_221.region001	Polyketide	hglE-KS	55.0626	685.642	2.8361	Bacteria	Myxococcota	Polyangia	Polyangiales	SG8-38	JAADHO01
M33	Barite_M33_B110	FEKFMOAO_314.region001	Polyketide	hglE-KS	343.615	3523.31	3.54695	Bacteria	Myxococcota_A	UBA9160	UBA9160	UBA4427	UBA4427
M33	Barite_M33_B58	LMIOODIL_111.region001	Polyketide	hglE-KS	263.789	2704.81	3.43214	Bacteria	Myxococcota	Bradymonadia	UBA4248
M33	Barite_M33_B58	LMIOODIL_162.region001	Polyketide	hglE-KS	126.666	1298.79	3.11354	Bacteria	Myxococcota	Bradymonadia	UBA4248
M33	Barite_M33_B37	NKGBANJE_55.region001	Polyketide	hglE-KS	41.8081	428.686	2.63214	Bacteria	Pseudomonadota	Gammaproteobacteria	Pseudomonadales	Halieaceae	Halioglobus
M24	Aegir_M24_B103	PADGKGNB_202.region001	Hybrid	hglE-KS:T1PKS	455.657	8187.02	3.91313	Bacteria	Planctomycetota	UBA11346	UBA11346	UBA11346	JANQLF01
M39	Aegir_M39_B99	AAIIPECO_57.region001	Hybrid	hglE-KS:T1PKS	53.1374	661.67	2.82064	Bacteria	Desulfobacterota	Desulfobacteria	Desulfobacterales	Desulfosarcinaceae
M39	Aegir_M39_B141	FDIMNBAG_121.region001	Hybrid	hglE-KS:T1PKS	52.3867	652.321	2.81446	Bacteria	Desulfobacterota_F	DSWW01	DSWW01	DSWW01
M39	Aegir_M39_B98	KEGBFKGK_10.region001	Hybrid	hglE-KS:T1PKS	298.399	3715.68	3.57004	Bacteria	Desulfobacterota	Desulfobacteria	Desulfobacterales	JAFDDL01
M39	Aegir_M39_B174	PAJIPFJH_161.region001	Hybrid	hglE-KS:T1PKS	104.264	1298.3	3.11337	Bacteria	Pseudomonadota	Gammaproteobacteria	Methylococcales	Methylomonadaceae
M33	Barite_M33_B66	NGMOPKMC_308.region001	Hybrid	hglE-KS:T1PKS	85.2248	873.866	2.94144	Bacteria	Hydrogenedentota	Hydrogenedentia	Hydrogenedentiales	GCA-2746185	DTSJ01
M24	Aegir_M24_B115	FBCILAEC_199.region001	Other	hserlactone	607.807	10920.8	4.03825	Bacteria	Pseudomonadota	Alphaproteobacteria	Rhodobacterales	Rhodobacteraceae	Profundibacter
M24	Aegir_M24_B52	JLMBNEBE_91.region001	Other	hserlactone	262.333	4713.47	3.67334	Bacteria	Pseudomonadota	Gammaproteobacteria	Enterobacterales	Alteromonadaceae	Colwellia
M25	Aegir_M25_B191	DOFINDKD_26.region001	Other	hserlactone	4133.87	34564.4	4.53863	Bacteria	Pseudomonadota	Gammaproteobacteria	Methylococcales	Methylomonadaceae	Methylomarinum
M39	Aegir_M39_B149	EDJGDHEF_149.region001	Other	hserlactone	481.731	5998.54	3.77805	Bacteria	Pseudomonadota	Gammaproteobacteria	Methylococcales	Methylomonadaceae	Methylomarinum
M39	Aegir_M39_B149	EDJGDHEF_50.region001	Other	hserlactone	101.704	1266.42	3.10258	Bacteria	Pseudomonadota	Gammaproteobacteria	Methylococcales	Methylomonadaceae	Methylomarinum
M39	Aegir_M39_B108	ELMMPHKD_253.region001	Other	hserlactone	103.086	1283.63	3.10844	Bacteria	Pseudomonadota	Alphaproteobacteria	Rhodobacterales	Rhodobacteraceae	UBA3077
M39	Aegir_M39_B117	IAKFMJEM_125.region001	Other	hserlactone	99.8755	1243.65	3.0947	Bacteria	Pseudomonadota	Alphaproteobacteria	Rhodobacterales	Rhodobacteraceae	Roseovarius
M39	Aegir_M39_B117	IAKFMJEM_197.region001	Other	hserlactone	202.108	2516.66	3.40083	Bacteria	Pseudomonadota	Alphaproteobacteria	Rhodobacterales	Rhodobacteraceae	Roseovarius
M39	Aegir_M39_B182	LIPJKAHJ_33.region001	Other	hserlactone	241.139	3002.68	3.47751	Bacteria	Pseudomonadota	Alphaproteobacteria	Rhodobacterales	Rhodobacteraceae	Profundibacter	Profundibacter amoris
M39	Aegir_M39_B182	LIPJKAHJ_67.region001	Other	hserlactone	161.345	2009.08	3.303	Bacteria	Pseudomonadota	Alphaproteobacteria	Rhodobacterales	Rhodobacteraceae	Profundibacter	Profundibacter amoris
M39	Aegir_M39_B55	NLFFCBIA_81.region001	Other	hserlactone	137.522	1712.43	3.23361	Bacteria	Pseudomonadota	Gammaproteobacteria	Methylococcales	Methylomonadaceae	QPIN01
M39	Aegir_M39_B146	OICIJIOO_157.region001	Other	hserlactone	142.513	1774.58	3.24909	Bacteria	Pseudomonadota	Gammaproteobacteria	Methylococcales	Methylomonadaceae
M33	Barite_M33_B42	BMMDGOPI_13.region001	Other	hserlactone	74.3818	762.686	2.88235	Bacteria	Pseudomonadota	Alphaproteobacteria	Micavibrionales	Micavibrionaceae	JAJRYK01
M33	Barite_M33_B88	CDIGHOGO_114.region001	Other	hserlactone	75.236	771.444	2.8873	Bacteria	Pseudomonadota	Alphaproteobacteria	Rhodobacterales	Rhodobacteraceae	Amylibacter
M33	Barite_M33_B2	JBFOKAIG_13.region001	Other	hserlactone	75.2032	771.108	2.88712	Bacteria	Pseudomonadota	Alphaproteobacteria	Caulobacterales	Maricaulaceae	Robiginitomaculum_A
M39	Aegir_M39_B102	HHBKGBCH_15.region001	Hybrid	hserlactone:RiPP-redox-cofactor	39.3493	489.979	2.69018	Bacteria	Pseudomonadota	Alphaproteobacteria	Rhodobacterales	Rhodobacteraceae	Oceanicella
M37	Aegir_M37_B54	LHGBMGDM_390.region001	Other	hydrogen-cyanide	11640.3	86343.5	4.93623	Bacteria	Bacteroidota	Bacteroidia	Bacteroidales	GCA-2711565	GCA-2711565
M38	Aegir_M38_B72	JLHIKFCN_28.region001	Other	hydrogen-cyanide	5950.99	88580.3	4.94734	Bacteria	Pseudomonadota	Gammaproteobacteria	Methylococcales	Methylomonadaceae	WTBX01
M38	Aegir_M38_B21	NIMPLCKH_3.region001	Other	hydrogen-cyanide	719.375	10707.9	4.0297	Bacteria	Pseudomonadota	Gammaproteobacteria	Methylococcales	Methylomonadaceae	QPIN01
M39	Aegir_M39_B196	BKLBJKCE_397.region001	Other	hydrogen-cyanide	203.221	2530.52	3.40321	Bacteria	Desulfobacterota	Desulfobacteria	Desulfobacterales	JAABRJ01
M39	Aegir_M39_B23	CIBCBEEE_156.region001	Other	hydrogen-cyanide	1945.88	24230.1	4.38436	Bacteria	Pseudomonadota	Gammaproteobacteria	Methylococcales	Methylomonadaceae
M39	Aegir_M39_B184	EDPJEEBL_131.region001	Other	hydrogen-cyanide	381.168	4746.32	3.67636	Archaea	Asgardarchaeota	Heimdallarchaeia	UBA460	UBA460
M39	Aegir_M39_B123	GAPCFIGP_110.region001	Other	hydrogen-cyanide	116.726	1453.48	3.16241	Bacteria	Desulfobacterota	DSM-4660	Desulfatiglandales	Desulfatiglandaceae	B46-G9
M39	Aegir_M39_B192	HEEDOPCH_142.region001	Other	hydrogen-cyanide	519.265	6465.91	3.81063	Bacteria	Pseudomonadota	Gammaproteobacteria	Methylococcales	Methylomonadaceae	QPIN01
M39	Aegir_M39_B109	ICBCKKKK_30.region001	Other	hydrogen-cyanide	350.191	4360.59	3.63955	Bacteria	Bacteroidota	Bacteroidia	Bacteroidales	JAADJA01	JAADJA01
M39	Aegir_M39_B154	IPGEANND_7.region001	Other	hydrogen-cyanide	249.082	3101.58	3.49158	Bacteria	Krumholzibacteriota	Krumholzibacteria	Krumholzibacteriales	Krumholzibacteriaceae	4484-7
M39	Aegir_M39_B144	LEDLLEGN_61.region001	Other	hydrogen-cyanide	779.385	9704.93	3.98699	Bacteria	Pseudomonadota	Gammaproteobacteria	Chromatiales	Sedimenticolaceae	Thiolapillus
M39	Aegir_M39_B38	LLKGMAIK_200.region001	Other	hydrogen-cyanide	178.042	2216.98	3.34576	Bacteria	Chloroflexota	Anaerolineae	B4-G1	B4-G1	B4-G1
M39	Aegir_M39_B146	OICIJIOO_102.region001	Other	hydrogen-cyanide	406.243	5058.56	3.70403	Bacteria	Pseudomonadota	Gammaproteobacteria	Methylococcales	Methylomonadaceae
M39	Aegir_M39_B180	PILMEDLM_183.region001	Other	hydrogen-cyanide	592.133	7373.26	3.86766	Bacteria	Desulfobacterota	DSM-4660	Desulfatiglandales	Desulfatiglandaceae	B111-G9
M33	Barite_M33_B85	CMOCHALP_315.region001	Other	hydrogen-cyanide	722.062	7403.78	3.86945	Bacteria	Pseudomonadota	Gammaproteobacteria	Pseudomonadales	Pseudohongiellaceae	UBA9145
M33	Barite_M33_B6	LPIDFHMF_27.region001	Other	hydrogen-cyanide	178.216	1827.37	3.26183	Bacteria	Pseudomonadota	Gammaproteobacteria	Methylococcales	Methylomonadaceae	QPIN01
M33	Barite_M33_B89	EMEEGMFL_525.region001	Hybrid	hydrogen-cyanide:NRPS:transAT-PKS	119.068	1220.89	3.08668	Bacteria	Pseudomonadota	Gammaproteobacteria	Enterobacterales	Alteromonadaceae	JABSOG01
M36	Aegir_M36_B50	ECGDAIFI_37.region001	RiPP	lanthipeptide	2511.77	17543.2	4.24411	Bacteria	Bacteroidota	Bacteroidia	Cytophagales	Cyclobacteriaceae	JAKISE01
M36	Aegir_M36_B69	GLOGLBCN_2.region001	RiPP	lanthipeptide	3578.18	24991.4	4.39779	Bacteria	Bacteroidota	Bacteroidia	Flavobacteriales	Parvicellaceae	S010-51
M37	Aegir_M37_B30	MNOMKIBA_153.region001	RiPP	lanthipeptide	3203.58	23763	4.3759	Bacteria	Bacteroidota	Bacteroidia	Flavobacteriales	Flavobacteriaceae	Maribacter_C
M33	Barite_M33_B115	BIPDNBCM_163.region001	RiPP	lanthipeptide	93.11	954.718	2.97988	Bacteria	Bacteroidota	Bacteroidia	Flavobacteriales	Salibacteraceae	CAJXZP01
M33	Barite_M33_B21	PKDJBPAN_94.region001	RiPP	lanthipeptide	58.678	601.664	2.77935	Bacteria	Bacteroidota	Bacteroidia	Cytophagales	Cyclobacteriaceae	Roseivirga
M33	Barite_M33_B58	LMIOODIL_163.region001	RiPP	lassopeptide	108.853	1116.15	3.04772	Bacteria	Myxococcota	Bradymonadia	UBA4248
M33	Barite_M33_B69	FHIEFOOH_102.region001	Hybrid	lassopeptide:RRE-containing	254.202	2606.51	3.41606	Bacteria	Pseudomonadota	Gammaproteobacteria	Arenicellales	Arenicellaceae	Arenicella	Arenicella sp016763815
M37	Aegir_M37_B22	NLCMHHHC_240.region001	Other	NAPAA	10910.4	80929.1	4.9081	Bacteria	Pseudomonadota	Gammaproteobacteria	Thiotrichales	Thiotrichaceae	HyVt-477
M24	Aegir_M24_B12	AMEDOMHJ_272.region001	NRP	NRP generic	1079.01	19387.2	4.28751	Bacteria	Pseudomonadota	Gammaproteobacteria	SZUA-229	SZUA-229	GCA-2746365
M24	Aegir_M24_B127	DHLFLHGA_556.region001	NRP	NRP generic	910.637	16361.9	4.21383	Bacteria	Planctomycetota	GCA-2746535	GCA-2746535	GCA-2746535	GCA-2746535
M24	Aegir_M24_B58	GNKANFNI_27.region001	NRP	NRP generic	5040.58	90566.5	4.95697	Bacteria	Pseudomonadota	Gammaproteobacteria	Methylococcales	Methylomonadaceae	WTBX01
M24	Aegir_M24_B70	KKGMONJA_202.region001	NRP	NRP generic	1872.41	33642.5	4.52689	Bacteria	Campylobacterota	Campylobacteria	Campylobacterales	Sulfurimonadaceae	GCA-2733885
M24	Aegir_M24_B75	NCJJNLBN_17.region001	NRP	NRP generic	330.176	5932.44	3.77323	Bacteria	Pseudomonadota	Gammaproteobacteria	Methylococcales	Methylomonadaceae	WTBX01
M25	Aegir_M25_B188	DCCNGCIG_256.region001	NRP	NRP generic	2563.08	21430.6	4.33103	Bacteria	KSB1	UBA2214	JACIZP01	JADDFT01	JADDFT01
M25	Aegir_M25_B125	EBNFPCOF_168.region001	NRP	NRP generic	1278.81	10692.5	4.02908	Bacteria	Chloroflexota	Anaerolineae	4572-78	J111	J111
M25	Aegir_M25_B56	NICDANKK_55.region001	NRP	NRP generic	3213.7	26870.6	4.42928	Bacteria	Calditrichota	Calditrichia	RBG-13-44-9	J042	WGBF01
M25	Aegir_M25_B56	NICDANKK_66.region001	NRP	NRP generic	18399.7	153845	5.18708	Bacteria	Calditrichota	Calditrichia	RBG-13-44-9	J042	WGBF01
M36	Aegir_M36_B66	EOCGDEIA_30.region001	NRP	NRP generic	1726.43	12058.1	4.08128	Bacteria	Campylobacterota	Campylobacteria	Campylobacterales	Sulfurovaceae	SZUA-451
M36	Aegir_M36_B66	EOCGDEIA_59.region001	NRP	NRP generic	5094.4	35581.3	4.55122	Bacteria	Campylobacterota	Campylobacteria	Campylobacterales	Sulfurovaceae	SZUA-451
M37	Aegir_M37_B9	EMJIGOFO_71.region001	NRP	NRP generic	1201.2	8910.04	3.94988	Bacteria	Pseudomonadota	Gammaproteobacteria	Methylococcales	Methylomonadaceae	QPIN01
M38	Aegir_M38_B30	APGDIBME_12.region001	NRP	NRP generic	112.763	1678.47	3.22491	Bacteria	Pseudomonadota	Gammaproteobacteria	Methylococcales	Methylomonadaceae	WTBX01
M38	Aegir_M38_B26	BHAGBGDA_6.region001	NRP	NRP generic	434.718	6470.78	3.81096	Bacteria	Pseudomonadota	Gammaproteobacteria	Methylococcales	Methylomonadaceae	Methyloprofundus
M38	Aegir_M38_B66	EMLCJMHO_100.region001	NRP	NRP generic	419.44	6243.36	3.79542	Bacteria	Desulfobacterota	Desulfobulbia	Desulfobulbales	Desulfurivibrionaceae
M38	Aegir_M38_B43	NPMKINEH_135.region001	NRP	NRP generic	273.655	4073.35	3.60995	Bacteria	Pseudomonadota	Zetaproteobacteria	Mariprofundales	Mariprofundaceae	Mariprofundus
M38	Aegir_M38_B43	NPMKINEH_226.region001	NRP	NRP generic	321.968	4792.49	3.68056	Bacteria	Pseudomonadota	Zetaproteobacteria	Mariprofundales	Mariprofundaceae	Mariprofundus
M38	Aegir_M38_B101	OPDMMHKB_58.region001	NRP	NRP generic	213.443	3177.09	3.50203	Bacteria	Pseudomonadota	Gammaproteobacteria	Enterobacterales_A	Kangiellaceae	GCA-002733465
M39	Aegir_M39_B192	HEEDOPCH_120.region001	NRP	NRP generic	37.9115	472.075	2.67401	Bacteria	Pseudomonadota	Gammaproteobacteria	Methylococcales	Methylomonadaceae	QPIN01
M39	Aegir_M39_B102	HHBKGBCH_73.region001	NRP	NRP generic	46.2337	575.703	2.7602	Bacteria	Pseudomonadota	Alphaproteobacteria	Rhodobacterales	Rhodobacteraceae	Oceanicella
M39	Aegir_M39_B25	IAPKAMMO_326.region001	NRP	NRP generic	158.158	1969.39	3.29433	Bacteria	Planctomycetota	JADGBV01	JADGBV01	JADGBV01
M39	Aegir_M39_B112	ICNECMED_130.region001	NRP	NRP generic	196.663	2448.86	3.38896	Bacteria	Calditrichota	Calditrichia	Calditrichales	Calditrichaceae	JANTFQ01
M39	Aegir_M39_B15	JKANDIBI_276.region001	NRP	NRP generic	53.1681	662.051	2.82089	Bacteria	KSB1	UBA2214	UBA2214	Zgenome-0027	JAJRST01
M39	Aegir_M39_B15	JKANDIBI_61.region001	NRP	NRP generic	143.337	1784.83	3.2516	Bacteria	KSB1	UBA2214	UBA2214	Zgenome-0027	JAJRST01
M39	Aegir_M39_B29	LDFDGFAA_263.region001	NRP	NRP generic	326.897	4070.54	3.60965	Bacteria	Calditrichota	Calditrichia	Calditrichales	Calditrichaceae	Caldithrix
M39	Aegir_M39_B125	LGFNCOND_229.region001	NRP	NRP generic	44.077	548.848	2.73945	Bacteria	KSB1	UBA2214	JACIZP01	JADDFT01	JADDFT01
M39	Aegir_M39_B55	NLFFCBIA_4.region001	NRP	NRP generic	113.696	1415.74	3.15098	Bacteria	Pseudomonadota	Gammaproteobacteria	Methylococcales	Methylomonadaceae	QPIN01
M39	Aegir_M39_B174	PAJIPFJH_141.region001	NRP	NRP generic	41.822	520.77	2.71665	Bacteria	Pseudomonadota	Gammaproteobacteria	Methylococcales	Methylomonadaceae
M39	Aegir_M39_B63	PMCGENNM_191.region001	NRP	NRP generic	221.366	2756.46	3.44035	Bacteria	Bacteroidota	Ignavibacteria	Ignavibacteriales	Melioribacteraceae	GCA-2746605
M39	Aegir_M39_B63	PMCGENNM_264.region001	NRP	NRP generic	243.877	3036.77	3.48241	Bacteria	Bacteroidota	Ignavibacteria	Ignavibacteriales	Melioribacteraceae	GCA-2746605
M33	Barite_M33_B31	ALBGKPPL_221.region001	NRP	NRP generic	223.007	2286.63	3.3592	Bacteria	Pseudomonadota	Gammaproteobacteria	Enterobacterales	Kangiellaceae	GCA-002733465
M33	Barite_M33_B89	EMEEGMFL_242.region001	NRP	NRP generic	247.734	2540.18	3.40486	Bacteria	Pseudomonadota	Gammaproteobacteria	Enterobacterales	Alteromonadaceae	JABSOG01
M33	Barite_M33_B89	EMEEGMFL_269.region001	NRP	NRP generic	112.783	1156.44	3.06312	Bacteria	Pseudomonadota	Gammaproteobacteria	Enterobacterales	Alteromonadaceae	JABSOG01
M33	Barite_M33_B89	EMEEGMFL_318.region001	NRP	NRP generic	203.913	2090.85	3.32032	Bacteria	Pseudomonadota	Gammaproteobacteria	Enterobacterales	Alteromonadaceae	JABSOG01
M33	Barite_M33_B89	EMEEGMFL_372.region001	NRP	NRP generic	699.3	7170.38	3.85554	Bacteria	Pseudomonadota	Gammaproteobacteria	Enterobacterales	Alteromonadaceae	JABSOG01
M33	Barite_M33_B89	EMEEGMFL_403.region001	NRP	NRP generic	416.411	4269.73	3.6304	Bacteria	Pseudomonadota	Gammaproteobacteria	Enterobacterales	Alteromonadaceae	JABSOG01
M33	Barite_M33_B89	EMEEGMFL_414.region001	NRP	NRP generic	212.887	2182.87	3.33903	Bacteria	Pseudomonadota	Gammaproteobacteria	Enterobacterales	Alteromonadaceae	JABSOG01
M33	Barite_M33_B89	EMEEGMFL_503.region001	NRP	NRP generic	128.034	1312.82	3.1182	Bacteria	Pseudomonadota	Gammaproteobacteria	Enterobacterales	Alteromonadaceae	JABSOG01
M33	Barite_M33_B89	EMEEGMFL_559.region001	NRP	NRP generic	52.8377	541.78	2.73382	Bacteria	Pseudomonadota	Gammaproteobacteria	Enterobacterales	Alteromonadaceae	JABSOG01
M33	Barite_M33_B89	EMEEGMFL_56.region001	NRP	NRP generic	768.14	7876.25	3.89632	Bacteria	Pseudomonadota	Gammaproteobacteria	Enterobacterales	Alteromonadaceae	JABSOG01
M33	Barite_M33_B89	EMEEGMFL_634.region001	NRP	NRP generic	510.452	5234	3.71883	Bacteria	Pseudomonadota	Gammaproteobacteria	Enterobacterales	Alteromonadaceae	JABSOG01
M33	Barite_M33_B89	EMEEGMFL_637.region001	NRP	NRP generic	183.524	1881.79	3.27457	Bacteria	Pseudomonadota	Gammaproteobacteria	Enterobacterales	Alteromonadaceae	JABSOG01
M33	Barite_M33_B89	EMEEGMFL_647.region001	NRP	NRP generic	525.836	5391.75	3.73173	Bacteria	Pseudomonadota	Gammaproteobacteria	Enterobacterales	Alteromonadaceae	JABSOG01
M33	Barite_M33_B89	EMEEGMFL_767.region001	NRP	NRP generic	445.182	4564.75	3.65942	Bacteria	Pseudomonadota	Gammaproteobacteria	Enterobacterales	Alteromonadaceae	JABSOG01
M33	Barite_M33_B89	EMEEGMFL_880.region001	NRP	NRP generic	634.312	6504.02	3.81318	Bacteria	Pseudomonadota	Gammaproteobacteria	Enterobacterales	Alteromonadaceae	JABSOG01
M33	Barite_M33_B89	EMEEGMFL_892.region001	NRP	NRP generic	271.231	2781.11	3.44422	Bacteria	Pseudomonadota	Gammaproteobacteria	Enterobacterales	Alteromonadaceae	JABSOG01
M33	Barite_M33_B97	FAPGKHBG_142.region001	NRP	NRP generic	1274.87	13072.1	4.11635	Bacteria	Pseudomonadota	Gammaproteobacteria	Xanthomonadales	Marinicellaceae	NORP309
M33	Barite_M33_B97	FAPGKHBG_151.region001	NRP	NRP generic	2291.1	23492.2	4.37092	Bacteria	Pseudomonadota	Gammaproteobacteria	Xanthomonadales	Marinicellaceae	NORP309
M33	Barite_M33_B97	FAPGKHBG_171.region001	NRP	NRP generic	671.237	6882.64	3.83775	Bacteria	Pseudomonadota	Gammaproteobacteria	Xanthomonadales	Marinicellaceae	NORP309
M33	Barite_M33_B97	FAPGKHBG_17.region001	NRP	NRP generic	844.461	8658.82	3.93746	Bacteria	Pseudomonadota	Gammaproteobacteria	Xanthomonadales	Marinicellaceae	NORP309
M33	Barite_M33_B97	FAPGKHBG_206.region001	NRP	NRP generic	1652.5	16944.1	4.22902	Bacteria	Pseudomonadota	Gammaproteobacteria	Xanthomonadales	Marinicellaceae	NORP309
M33	Barite_M33_B97	FAPGKHBG_53.region001	NRP	NRP generic	1670.64	17130.2	4.23376	Bacteria	Pseudomonadota	Gammaproteobacteria	Xanthomonadales	Marinicellaceae	NORP309
M33	Barite_M33_B97	FAPGKHBG_98.region001	NRP	NRP generic	578.861	5935.45	3.77345	Bacteria	Pseudomonadota	Gammaproteobacteria	Xanthomonadales	Marinicellaceae	NORP309
M33	Barite_M33_B69	FHIEFOOH_130.region001	NRP	NRP generic	227.733	2335.09	3.3683	Bacteria	Pseudomonadota	Gammaproteobacteria	Arenicellales	Arenicellaceae	Arenicella	Arenicella sp016763815
M33	Barite_M33_B74	GEAAAAEN_303.region001	NRP	NRP generic	74.5962	764.885	2.8836	Bacteria	Bacteroidota	Bacteroidia	J057	JADKCL01
M33	Barite_M33_B23	JICMBPMM_213.region001	NRP	NRP generic	904.055	9269.88	3.96707	Bacteria	Pseudomonadota	Gammaproteobacteria	Methylococcales	Methylomonadaceae	WTBX01
M33	Barite_M33_B38	JMMHIICP_88.region001	NRP	NRP generic	77.3555	793.177	2.89937	Bacteria	Pseudomonadota	Gammaproteobacteria	Enterobacterales	Kangiellaceae	GCA-002733465
M33	Barite_M33_B21	PKDJBPAN_103.region001	NRP	NRP generic	132.884	1362.55	3.13435	Bacteria	Bacteroidota	Bacteroidia	Cytophagales	Cyclobacteriaceae	Roseivirga
M33	Barite_M33_B21	PKDJBPAN_152.region001	NRP	NRP generic	50.6688	519.54	2.71562	Bacteria	Bacteroidota	Bacteroidia	Cytophagales	Cyclobacteriaceae	Roseivirga
M33	Barite_M33_B21	PKDJBPAN_85.region001	NRP	NRP generic	114.523	1174.29	3.06977	Bacteria	Bacteroidota	Bacteroidia	Cytophagales	Cyclobacteriaceae	Roseivirga
M24	Aegir_M24_B45	DPHDEEHI_35.region001	NRP	NRPS-like	168.847	3033.75	3.48198	Bacteria	Myxococcota	Bradymonadia	Bradymonadales	Bradymonadaceae	CALJNB01
M24	Aegir_M24_B62	OOCMFLME_373.region001	NRP	NRPS-like	1113.83	20012.7	4.30131	Bacteria	Pseudomonadota	Gammaproteobacteria	Methylococcales	Methylomonadaceae	QPIN01
M25	Aegir_M25_B64	NPKIOIOJ_12.region001	NRP	NRPS-like	3246.25	27142.7	4.43365	Bacteria	Aquificota	Aquificae	Hydrogenothermales	Hydrogenothermaceae	Persephonella
M36	Aegir_M36_B46	AODPIKDL_115.region001	NRP	NRPS-like	798.598	5577.72	3.74646	Bacteria	Myxococcota	UBA727	UBA727
M36	Aegir_M36_B34	CHHKDDGB_45.region002	NRP	NRPS-like	456.732	3190	3.50379	Bacteria	Myxococcota	UBA796	UBA796	CAJQPC01	CAJQPC01
M37	Aegir_M37_B17	NGEBLNKK_39.region001	NRP	NRPS-like	1897.66	14076.2	4.14848	Bacteria	Pseudomonadota	Gammaproteobacteria	Methylococcales	Methylomonadaceae	Methyloprofundus
M38	Aegir_M38_B95	NLOGALHF_173.region001	NRP	NRPS-like	699.098	10406.1	4.01729	Bacteria	Desulfobacterota	Desulfobulbia	Desulfobulbales	Desulfurivibrionaceae
M39	Aegir_M39_B110	BFEMGKGJ_12.region001	NRP	NRPS-like	58.7698	731.804	2.8644	Bacteria	Myxococcota	Polyangia	Haliangiales	Haliangiaceae	NORP324
M39	Aegir_M39_B17	CBJJPFKK_17.region001	NRP	NRPS-like	80.3876	1000.99	3.00043	Bacteria	Aquificota	Aquificae	Hydrogenothermales	Hydrogenothermaceae	Persephonella
M39	Aegir_M39_B23	CIBCBEEE_111.region001	NRP	NRPS-like	267.292	3328.33	3.52223	Bacteria	Pseudomonadota	Gammaproteobacteria	Methylococcales	Methylomonadaceae
M39	Aegir_M39_B191	EEGHMLPD_225.region001	NRP	NRPS-like	3551.59	44224.5	4.64566	Bacteria	Pseudomonadota	Gammaproteobacteria	Methylococcales	Methylomonadaceae	Methyloprofundus	Methyloprofundus sp900128525
M39	Aegir_M39_B150	GLJOBBPH_429.region001	NRP	NRPS-like	2632.53	32780.4	4.51561	Bacteria	Pseudomonadota	Gammaproteobacteria	Beggiatoales	Beggiatoaceae	Thiomargarita
M39	Aegir_M39_B25	IAPKAMMO_313.region001	NRP	NRPS-like	216.547	2696.45	3.43079	Bacteria	Planctomycetota	JADGBV01	JADGBV01	JADGBV01
M39	Aegir_M39_B146	OICIJIOO_10.region001	NRP	NRPS-like	97.8603	1218.56	3.08585	Bacteria	Pseudomonadota	Gammaproteobacteria	Methylococcales	Methylomonadaceae
M33	Barite_M33_B105	ADJNEHKA_168.region001	NRP	NRPS-like	242.095	2482.36	3.39486	Bacteria	Pseudomonadota	Gammaproteobacteria	Methylococcales	Methylomonadaceae
M33	Barite_M33_B87	BAIALBNB_118.region001	NRP	NRPS-like	53.0055	543.5	2.7352	Bacteria	Pseudomonadota	Gammaproteobacteria	Xanthomonadales	SZUA-36	SZUA-36
M33	Barite_M33_B102	BFHHFIMI_62.region001	NRP	NRPS-like	107.807	1105.41	3.04353	Bacteria	Planctomycetota	UBA1135	UBA1135	GCA-002686595	NORP259
M33	Barite_M33_B113	BMEKDGJI_3.region001	NRP	NRPS-like	45.0307	461.73	2.66439	Bacteria	Pseudomonadota	Gammaproteobacteria	Beggiatoales	Beggiatoaceae
M33	Barite_M33_B89	EMEEGMFL_660.region001	NRP	NRPS-like	1335.16	13690.3	4.13641	Bacteria	Pseudomonadota	Gammaproteobacteria	Enterobacterales	Alteromonadaceae	JABSOG01
M33	Barite_M33_B89	EMEEGMFL_71.region001	NRP	NRPS-like	492.404	5048.94	3.7032	Bacteria	Pseudomonadota	Gammaproteobacteria	Enterobacterales	Alteromonadaceae	JABSOG01
M33	Barite_M33_B89	EMEEGMFL_748.region001	NRP	NRPS-like	228.05	2338.35	3.36891	Bacteria	Pseudomonadota	Gammaproteobacteria	Enterobacterales	Alteromonadaceae	JABSOG01
M33	Barite_M33_B97	FAPGKHBG_276.region001	NRP	NRPS-like	2755.63	28255.3	4.4511	Bacteria	Pseudomonadota	Gammaproteobacteria	Xanthomonadales	Marinicellaceae	NORP309
M33	Barite_M33_B97	FAPGKHBG_290.region001	NRP	NRPS-like	984.885	10098.7	4.00426	Bacteria	Pseudomonadota	Gammaproteobacteria	Xanthomonadales	Marinicellaceae	NORP309
M33	Barite_M33_B97	FAPGKHBG_358.region001	NRP	NRPS-like	2087.09	21400.3	4.33042	Bacteria	Pseudomonadota	Gammaproteobacteria	Xanthomonadales	Marinicellaceae	NORP309
M33	Barite_M33_B36	KPIBPLGM_307.region001	NRP	NRPS-like	479.406	4915.66	3.69158	Bacteria	Pseudomonadota	Alphaproteobacteria	Rhodobacterales	Rhodobacteraceae	UBA3077
M33	Barite_M33_B17	MANEPPGP_469.region001	NRP	NRPS-like	580.267	5949.86	3.77451	Bacteria	Planctomycetota	UBA1135	UBA1135	UBA1135	GCA-2746235
M33	Barite_M33_B92	MHCCMMMN_30.region001	NRP	NRPS-like	128.362	1316.18	3.11932	Bacteria	Pseudomonadota	Gammaproteobacteria	Methylococcales	Methylomonadaceae	Methyloprofundus
M33	Barite_M33_B35	MMHLBHKL_421.region001	NRP	NRPS-like	114.017	1169.09	3.06785	Bacteria	Pseudomonadota	Gammaproteobacteria	Methylococcales	Methylomonadaceae	Methyloprofundus
M39	Aegir_M39_B23	CIBCBEEE_91.region001	Hybrid	NRPS-like:arylpolyene	374.804	4667.07	3.66904	Bacteria	Pseudomonadota	Gammaproteobacteria	Methylococcales	Methylomonadaceae
M25	Aegir_M25_B198	AFNHJEFG_35.region001	Hybrid	NRPS-like:RRE-containing	1236.67	10340.1	4.01452	Bacteria	Aquificota	Aquificae	Hydrogenothermales	Hydrogenothermaceae
M39	Aegir_M39_B75	GOFKCKIN_92.region001	Hybrid	NRPS-like:T1PKS	179.803	2238.92	3.35004	Bacteria	Pseudomonadota	Gammaproteobacteria	Methylococcales
M39	Aegir_M39_B105	MEBADGCM_128.region001	Hybrid	NRPS-like:T1PKS	104.783	1304.77	3.11553	Bacteria	Planctomycetota	UBA1135	UBA1135	GCA-002686595
M39	Aegir_M39_B39	NPMBOLIF_73.region001	Hybrid	NRPS-like:T1PKS	57.7483	719.084	2.85678	Bacteria	Myxococcota_A	UBA9160	UBA9160	UBA4427	UBA4427
M33	Barite_M33_B88	CDIGHOGO_170.region001	Hybrid	NRPS-like:T1PKS	37.9082	388.698	2.58961	Bacteria	Pseudomonadota	Alphaproteobacteria	Rhodobacterales	Rhodobacteraceae	Amylibacter
M39	Aegir_M39_B166	GHHMGHBK_53.region001	Hybrid	NRPS:lanthipeptide	78.1212	972.768	2.98801	Bacteria	Pseudomonadota	Alphaproteobacteria	Rhodobacterales	Rhodobacteraceae	UBA3077
M33	Barite_M33_B89	EMEEGMFL_888.region001	Hybrid	NRPS:NRP-metallophore	105.353	1080.25	3.03353	Bacteria	Pseudomonadota	Gammaproteobacteria	Enterobacterales	Alteromonadaceae	JABSOG01
M33	Barite_M33_B97	FAPGKHBG_244.region001	Hybrid	NRPS:NRPS-like	1483.99	15216.4	4.18231	Bacteria	Pseudomonadota	Gammaproteobacteria	Xanthomonadales	Marinicellaceae	NORP309
M33	Barite_M33_B23	JICMBPMM_2.region001	Hybrid	NRPS:NRPS-like	1082.37	11098.2	4.04525	Bacteria	Pseudomonadota	Gammaproteobacteria	Methylococcales	Methylomonadaceae	WTBX01
M33	Barite_M33_B4	NGHILOBA_38.region001	Hybrid	NRPS:NRPS-like:RRE-containing	128.77	1320.36	3.12069	Bacteria	Pseudomonadota	Gammaproteobacteria	Arenicellales	Poriferihabitantaceae	JAAELZ01
M39	Aegir_M39_B63	PMCGENNM_184.region001	Hybrid	NRPS:NRPS-like:T1PKS	105.201	1309.97	3.11726	Bacteria	Bacteroidota	Ignavibacteria	Ignavibacteriales	Melioribacteraceae	GCA-2746605
M33	Barite_M33_B29	NJGHEJCP_235.region001	Hybrid	NRPS:NRPS-like:T1PKS	86.3816	885.727	2.9473	Bacteria	Pseudomonadota	Gammaproteobacteria	SZUA-229	SZUA-229	GCA-2746365
M33	Barite_M33_B29	NJGHEJCP_65.region001	Hybrid	NRPS:NRPS-like:T1PKS	66.3701	680.537	2.83285	Bacteria	Pseudomonadota	Gammaproteobacteria	SZUA-229	SZUA-229	GCA-2746365
M24	Aegir_M24_B72	AMCEHCFD_185.region001	Hybrid	NRPS:T1PKS	92.6901	1665.41	3.22152	Bacteria	Bacteroidota	Bacteroidia	Flavobacteriales	Crocinitomicaceae	Crocinitomix
M24	Aegir_M24_B58	GNKANFNI_29.region001	Hybrid	NRPS:T1PKS	2480.8	44573.8	4.64908	Bacteria	Pseudomonadota	Gammaproteobacteria	Methylococcales	Methylomonadaceae	WTBX01
M24	Aegir_M24_B62	OOCMFLME_168.region001	Hybrid	NRPS:T1PKS	183.237	3292.31	3.5175	Bacteria	Pseudomonadota	Gammaproteobacteria	Methylococcales	Methylomonadaceae	QPIN01
M39	Aegir_M39_B112	ICNECMED_48.region001	Hybrid	NRPS:T1PKS	153.278	1908.63	3.28072	Bacteria	Calditrichota	Calditrichia	Calditrichales	Calditrichaceae	JANTFQ01
M39	Aegir_M39_B15	JKANDIBI_129.region001	Hybrid	NRPS:T1PKS	43.0055	535.506	2.72876	Bacteria	KSB1	UBA2214	UBA2214	Zgenome-0027	JAJRST01
M39	Aegir_M39_B20	KNGHPBFF_139.region001	Hybrid	NRPS:T1PKS	171.817	2139.48	3.33031	Bacteria	Bacteroidota	Bacteroidia	Flavobacteriales	Crocinitomicaceae	Crocinitomix
M39	Aegir_M39_B105	MEBADGCM_146.region001	Hybrid	NRPS:T1PKS	66.4346	827.246	2.91763	Bacteria	Planctomycetota	UBA1135	UBA1135	GCA-002686595
M33	Barite_M33_B89	EMEEGMFL_543.region001	Hybrid	NRPS:T1PKS	104.869	1075.29	3.03153	Bacteria	Pseudomonadota	Gammaproteobacteria	Enterobacterales	Alteromonadaceae	JABSOG01
M33	Barite_M33_B89	EMEEGMFL_557.region001	Hybrid	NRPS:T1PKS	107.119	1098.36	3.04075	Bacteria	Pseudomonadota	Gammaproteobacteria	Enterobacterales	Alteromonadaceae	JABSOG01
M33	Barite_M33_B69	FHIEFOOH_3.region001	Hybrid	NRPS:T1PKS	197.72	2027.36	3.30693	Bacteria	Pseudomonadota	Gammaproteobacteria	Arenicellales	Arenicellaceae	Arenicella	Arenicella sp016763815
M39	Aegir_M39_B147	FKCHBHNE_74.region001	Other	nucleoside	235.499	2932.44	3.46723	Archaea	Thermoplasmatota	E2	DHVEG-1	DHVEG-1	B44-G15
M33	Barite_M33_B90	MDJGNOFL_226.region001	Other	phosphonate	731.301	7498.51	3.87498	Bacteria	Bacteroidota	Bacteroidia	Cytophagales	Cyclobacteriaceae
M33	Barite_M33_B112	NPLDDKJN_303.region001	Other	phosphonate	221.796	2274.22	3.35683	Bacteria	Bacteroidota	Bacteroidia	Cytophagales	Cyclobacteriaceae	Reichenbachiella
M24	Aegir_M24_B52	JLMBNEBE_3.region001	Other	PUFA	1016.58	18265.4	4.26163	Bacteria	Pseudomonadota	Gammaproteobacteria	Enterobacterales	Alteromonadaceae	Colwellia
M24	Aegir_M24_B58	GNKANFNI_31.region001	RiPP	ranthipeptide	3669.3	65928.2	4.81907	Bacteria	Pseudomonadota	Gammaproteobacteria	Methylococcales	Methylomonadaceae	WTBX01
M36	Aegir_M36_B15	LAPKCFCO_69.region001	RiPP	ranthipeptide	1533.07	10707.5	4.02969	Bacteria	Myxococcota	Polyangia	HGW-17	HGW-17
M37	Aegir_M37_B40	LOEOMKJD_89.region001	RiPP	ranthipeptide	23840.4	176839	5.24758	Bacteria	Fermentibacterota	Fermentibacteria	Fermentibacterales	Fermentibacteraceae	Sabulitectum
M38	Aegir_M38_B4	CCEEDJDB_76.region001	RiPP	ranthipeptide	248.521	3699.23	3.56811	Archaea	Halobacteriota	Syntropharchaeia	ANME-1	ANME-1	G60ANME1
M38	Aegir_M38_B73	GACEDKPE_18.region001	RiPP	ranthipeptide	247.262	3680.5	3.56591	Bacteria	Pseudomonadota	Gammaproteobacteria	Methylococcales	Methylomonadaceae
M38	Aegir_M38_B75	IBOODKDA_98.region001	RiPP	ranthipeptide	260.512	3877.72	3.58858	Bacteria	Pseudomonadota	Zetaproteobacteria	Mariprofundales	Mariprofundaceae	GCA-2401635
M38	Aegir_M38_B72	JLHIKFCN_72.region001	RiPP	ranthipeptide	7355.92	109493	5.03939	Bacteria	Pseudomonadota	Gammaproteobacteria	Methylococcales	Methylomonadaceae	WTBX01
M39	Aegir_M39_B53	DHNEMAIL_97.region001	RiPP	ranthipeptide	1453.82	18103	4.25775	Bacteria	Pseudomonadota	Gammaproteobacteria	Nitrosococcales	Methylophagaceae	GCA-002733105
M39	Aegir_M39_B142	GEPOGDIE_170.region001	RiPP	ranthipeptide	221.484	2757.93	3.44058	Bacteria	Fermentibacterota	Fermentibacteria	Fermentibacterales	Fermentibacteraceae	Sabulitectum
M39	Aegir_M39_B71	OEDHKPFD_39.region001	RiPP	ranthipeptide	278.409	3466.76	3.53992	Bacteria	Pseudomonadota	Gammaproteobacteria	Methylococcales	Methylomonadaceae	QPIN01	QPIN01 sp021647585
M33	Barite_M33_B62	AGFGDEPP_5.region001	RiPP	ranthipeptide	72.3138	741.482	2.8701	Bacteria	Pseudomonadota	Alphaproteobacteria	Sphingomonadales	Emcibacteraceae	Paremcibacter
M33	Barite_M33_B23	JICMBPMM_201.region001	RiPP	ranthipeptide	1996.65	20473	4.31118	Bacteria	Pseudomonadota	Gammaproteobacteria	Methylococcales	Methylomonadaceae	WTBX01
M24	Aegir_M24_B131	CIIHKDJI_39.region001	RiPP	redox-cofactor	469.177	8429.94	3.92582	Bacteria	Pseudomonadota	Gammaproteobacteria	Nitrosococcales	Methylophagaceae	GCA-002733105
M24	Aegir_M24_B122	FDEIFABP_83.region001	RiPP	redox-cofactor	1234.65	22183.5	4.34603	Bacteria	Pseudomonadota	Gammaproteobacteria	Methylococcales	Methylomonadaceae	Methyloprofundus
M24	Aegir_M24_B44	LIEFECIJ_32.region001	RiPP	redox-cofactor	221.578	3981.19	3.60001	Bacteria	Pseudomonadota	Gammaproteobacteria	Methylococcales	Methylomonadaceae	QPIN01
M24	Aegir_M24_B84	NEHKBEFE_18.region001	RiPP	redox-cofactor	465.413	8362.3	3.92233	Bacteria	Pseudomonadota	Gammaproteobacteria	Nitrosococcales	Methylophagaceae	GCA-002733105
M25	Aegir_M25_B191	DOFINDKD_55.region001	RiPP	redox-cofactor	8961.22	74927.1	4.87464	Bacteria	Pseudomonadota	Gammaproteobacteria	Methylococcales	Methylomonadaceae	Methylomarinum
M36	Aegir_M36_B12	GOFJAIOF_12.region001	RiPP	redox-cofactor	10731.7	74954.6	4.8748	Bacteria	Pseudomonadota	Gammaproteobacteria	Nitrosococcales	Methylophagaceae	GCA-002733105
M36	Aegir_M36_B9	IJMCNGDJ_130.region001	RiPP	redox-cofactor	14727.2	102860	5.01225	Bacteria	Pseudomonadota	Gammaproteobacteria	Methylococcales	Methylomonadaceae	Methyloprofundus
M37	Aegir_M37_B12	GGOKCDCL_209.region001	RiPP	redox-cofactor	33073.9	245330	5.38975	Bacteria	Pseudomonadota	Gammaproteobacteria	Methylococcales	Methylomonadaceae	Methyloprofundus	Methyloprofundus sp900128525
M38	Aegir_M38_B22	HBKOMCGO_20.region001	RiPP	redox-cofactor	143.065	2129.51	3.32828	Bacteria	Pseudomonadota	Gammaproteobacteria	Nitrosococcales	Methylophagaceae	GCA-002733105
M38	Aegir_M38_B21	NIMPLCKH_54.region001	RiPP	redox-cofactor	285.319	4246.97	3.62808	Bacteria	Pseudomonadota	Gammaproteobacteria	Methylococcales	Methylomonadaceae	QPIN01
M39	Aegir_M39_B23	CIBCBEEE_22.region001	RiPP	redox-cofactor	1410.25	17560.4	4.24454	Bacteria	Pseudomonadota	Gammaproteobacteria	Methylococcales	Methylomonadaceae
M39	Aegir_M39_B149	EDJGDHEF_25.region001	RiPP	redox-cofactor	292.212	3638.64	3.56094	Bacteria	Pseudomonadota	Gammaproteobacteria	Methylococcales	Methylomonadaceae	Methylomarinum
M39	Aegir_M39_B191	EEGHMLPD_89.region001	RiPP	redox-cofactor	4687.08	58363.7	4.76614	Bacteria	Pseudomonadota	Gammaproteobacteria	Methylococcales	Methylomonadaceae	Methyloprofundus	Methyloprofundus sp900128525
M39	Aegir_M39_B146	OICIJIOO_28.region001	RiPP	redox-cofactor	156.085	1943.57	3.2886	Bacteria	Pseudomonadota	Gammaproteobacteria	Methylococcales	Methylomonadaceae
M25	Aegir_M25_B40	EJKDLJJF_58.region001	Other	resorcinol	9663.7	80800.7	4.90742	Bacteria	Bacteroidota	Bacteroidia	Flavobacteriales	Flavobacteriaceae	Lutimonas
M36	Aegir_M36_B17	PFPLAJGA_35.region001	Other	resorcinol	991.843	6927.42	3.84057	Bacteria	Pseudomonadota	Gammaproteobacteria	Nitrosococcales	Methylophagaceae	GCA-002733105
M39	Aegir_M39_B53	DHNEMAIL_61.region001	Other	resorcinol	800.404	9966.66	3.99855	Bacteria	Pseudomonadota	Gammaproteobacteria	Nitrosococcales	Methylophagaceae	GCA-002733105
M33	Barite_M33_B82	OKJDKIPL_74.region001	Other	resorcinol	393.711	4036.98	3.60606	Bacteria	Bacteroidota	Bacteroidia	Flavobacteriales	Cryomorphaceae	Cryomorpha
M33	Barite_M33_B68	OLFOFOJF_101.region001	Other	resorcinol	157.049	1610.33	3.20691	Bacteria	Campylobacterota	Campylobacteria	Campylobacterales	Sulfurimonadaceae	Sulfurimonas
M24	Aegir_M24_B68	BPKPMAHG_91.region001	RiPP	RiPP-like	1036.14	18616.8	4.2699	Bacteria	Campylobacterota	Campylobacteria	Campylobacterales	Sulfurovaceae	Sulfurovum
M24	Aegir_M24_B122	FDEIFABP_79.region001	RiPP	RiPP-like	934.953	16798.8	4.22528	Bacteria	Pseudomonadota	Gammaproteobacteria	Methylococcales	Methylomonadaceae	Methyloprofundus
M24	Aegir_M24_B58	GNKANFNI_62.region001	RiPP	RiPP-like	13099.6	235367	5.37175	Bacteria	Pseudomonadota	Gammaproteobacteria	Methylococcales	Methylomonadaceae	WTBX01
M24	Aegir_M24_B13	HMPFCKPD_12.region001	RiPP	RiPP-like	832.676	14961.1	4.17496	Bacteria	Pseudomonadota	Gammaproteobacteria	Beggiatoales	Beggiatoaceae
M25	Aegir_M25_B196	DNAEBAJA_236.region001	RiPP	RiPP-like	17301.6	144663	5.16036	Bacteria	Campylobacterota	Campylobacteria	Campylobacterales	Sulfurimonadaceae	Sulfurimonas
M25	Aegir_M25_B63	ECEBLJCB_19.region001	RiPP	RiPP-like	7407.85	61938.9	4.79196	Archaea	Thermoproteota	Thermoprotei_A	Sulfolobales	Pyrodictiaceae	Pyrolobus
M25	Aegir_M25_B131	LMAEHAIC_44.region001	RiPP	RiPP-like	3549.09	29674.9	4.47239	Bacteria	Aquificota	Aquificae	Hydrogenothermales	Hydrogenothermaceae	Hydrogenothermus
M25	Aegir_M25_B121	MGAKDEPC_75.region001	RiPP	RiPP-like	7904.14	66088.6	4.82013	Bacteria	Desulfobacterota	Dissulfuribacteria	Dissulfuribacterales	S140-46	S140-46
M36	Aegir_M36_B48	IGGOJNFL_34.region001	RiPP	RiPP-like	30944.9	216131	5.33472	Bacteria	Campylobacterota	Campylobacteria	Campylobacterales	Sulfurospirillaceae	Sulfurospirillum_A
M36	Aegir_M36_B57	IIFEMMGK_13.region001	RiPP	RiPP-like	17720.5	123767	5.09261	Bacteria	Campylobacterota	Campylobacteria	Campylobacterales	Sulfurovaceae	Sulfurovum
M36	Aegir_M36_B1	KLDNEJDF_28.region001	RiPP	RiPP-like	1874.89	13095	4.1171	Bacteria	Pseudomonadota	Gammaproteobacteria	Methylococcales	Cycloclasticaceae	Cycloclasticus
M36	Aegir_M36_B20	MGLIJNGM_128.region001	RiPP	RiPP-like	9813.98	68544.7	4.83597	Bacteria	Campylobacterota	Campylobacteria	Campylobacterales	Sulfurovaceae	Sulfurovum
M36	Aegir_M36_B17	PFPLAJGA_84.region001	RiPP	RiPP-like	5797.77	40493.9	4.60739	Bacteria	Pseudomonadota	Gammaproteobacteria	Nitrosococcales	Methylophagaceae	GCA-002733105
M37	Aegir_M37_B5	EBBODCAE_74.region001	RiPP	RiPP-like	13870.5	102886	5.01236	Bacteria	UBA3054	UBA3054	UBA3054	B51-G9
M37	Aegir_M37_B46	FJIODLBK_30.region001	RiPP	RiPP-like	9691.85	71890.6	4.85667	Bacteria	Pseudomonadota	Alphaproteobacteria	Rhodobacterales	Rhodobacteraceae	Profundibacter
M37	Aegir_M37_B56	LAJLOBNE_247.region001	RiPP	RiPP-like	9690.96	71884	4.85663	Bacteria	Desulfobacterota	Desulfobacteria	Desulfobacterales	Desulfosalsimonadaceae	SURF-3
M38	Aegir_M38_B4	CCEEDJDB_27.region001	RiPP	RiPP-like	1420.28	21140.8	4.32512	Archaea	Halobacteriota	Syntropharchaeia	ANME-1	ANME-1	G60ANME1
M38	Aegir_M38_B77	IEOKNLIK_35.region001	RiPP	RiPP-like	1379.54	20534.5	4.31248	Bacteria	Campylobacterota	Campylobacteria	Campylobacterales	Sulfurimonadaceae	Sulfurimonas
M38	Aegir_M38_B47	IIPPKAGC_14.region001	RiPP	RiPP-like	1821.34	27110.7	4.43314	Bacteria	Campylobacterota	Campylobacteria	Campylobacterales	Sulfurimonadaceae	Sulfurimonas
M38	Aegir_M38_B1	KIECNAKK_93.region001	RiPP	RiPP-like	1612.29	23998.9	4.38019	Bacteria	Campylobacterota	Campylobacteria	Campylobacterales	Sulfurimonadaceae	Sulfurimonas
M38	Aegir_M38_B84	LMKJOADE_40.region001	RiPP	RiPP-like	14383.9	214104	5.33062	Bacteria	Pseudomonadota	Gammaproteobacteria
M38	Aegir_M38_B38	LMPFGBPF_136.region001	RiPP	RiPP-like	1649.43	24551.7	4.39008	Bacteria	Pseudomonadota	Alphaproteobacteria	Rhodobacterales	Rhodobacteraceae	UBA3077
M38	Aegir_M38_B38	LMPFGBPF_9.region001	RiPP	RiPP-like	680.515	10129.5	4.00559	Bacteria	Pseudomonadota	Alphaproteobacteria	Rhodobacterales	Rhodobacteraceae	UBA3077
M38	Aegir_M38_B50	ONIMNOCE_75.region001	RiPP	RiPP-like	304.401	4531.01	3.6562	Bacteria	Pseudomonadota	Gammaproteobacteria	GCA-001735895	GCA-001735895
M39	Aegir_M39_B99	AAIIPECO_2.region001	RiPP	RiPP-like	221.248	2754.99	3.44012	Bacteria	Desulfobacterota	Desulfobacteria	Desulfobacterales	Desulfosarcinaceae
M39	Aegir_M39_B93	AMDMEECB_147.region001	RiPP	RiPP-like	972.986	12115.7	4.08335	Bacteria	Campylobacterota	Campylobacteria	Campylobacterales	Sulfurovaceae	Sulfurovum
M39	Aegir_M39_B45	BHJKMAJD_66.region001	RiPP	RiPP-like	1189.07	14806.3	4.17045	Archaea	Halobacteriota	Syntropharchaeia	ANME-1	ANME-1	G60ANME1
M39	Aegir_M39_B196	BKLBJKCE_217.region001	RiPP	RiPP-like	139.638	1738.77	3.24024	Bacteria	Desulfobacterota	Desulfobacteria	Desulfobacterales	JAABRJ01
M39	Aegir_M39_B23	CIBCBEEE_109.region001	RiPP	RiPP-like	939.686	11701	4.06822	Bacteria	Pseudomonadota	Gammaproteobacteria	Methylococcales	Methylomonadaceae
M39	Aegir_M39_B53	DHNEMAIL_207.region001	RiPP	RiPP-like	298.442	3716.21	3.5701	Bacteria	Pseudomonadota	Gammaproteobacteria	Nitrosococcales	Methylophagaceae	GCA-002733105
M39	Aegir_M39_B53	DHNEMAIL_273.region001	RiPP	RiPP-like	1978.32	24634.1	4.39154	Bacteria	Pseudomonadota	Gammaproteobacteria	Nitrosococcales	Methylophagaceae	GCA-002733105
M39	Aegir_M39_B51	DKEELOGD_85.region001	RiPP	RiPP-like	141.565	1762.78	3.2462	Bacteria	Desulfobacterota	DSM-4660	Desulfatiglandales	Desulfatiglandaceae
M39	Aegir_M39_B149	EDJGDHEF_101.region001	RiPP	RiPP-like	457.611	5698.2	3.75574	Bacteria	Pseudomonadota	Gammaproteobacteria	Methylococcales	Methylomonadaceae	Methylomarinum
M39	Aegir_M39_B191	EEGHMLPD_38.region001	RiPP	RiPP-like	4916.04	61214.7	4.78686	Bacteria	Pseudomonadota	Gammaproteobacteria	Methylococcales	Methylomonadaceae	Methyloprofundus	Methyloprofundus sp900128525
M39	Aegir_M39_B108	ELMMPHKD_43.region001	RiPP	RiPP-like	347.117	4322.32	3.63572	Bacteria	Pseudomonadota	Alphaproteobacteria	Rhodobacterales	Rhodobacteraceae	UBA3077
M39	Aegir_M39_B111	EOABJBEP_130.region001	RiPP	RiPP-like	453.861	5651.49	3.75216	Bacteria	Pseudomonadota	Gammaproteobacteria	CAJXQU01	CAJXQU01	CAJXQU01
M39	Aegir_M39_B147	FKCHBHNE_67.region001	RiPP	RiPP-like	164.599	2049.59	3.31167	Archaea	Thermoplasmatota	E2	DHVEG-1	DHVEG-1	B44-G15
M39	Aegir_M39_B153	FNBCAEOK_924.region001	RiPP	RiPP-like	260.447	3243.09	3.51096	Bacteria	Bdellovibrionota	Oligoflexia	Oligoflexales
M39	Aegir_M39_B127	GNEJKKOJ_15.region001	RiPP	RiPP-like	141.457	1761.43	3.24586	Bacteria	Pseudomonadota	Gammaproteobacteria	GCA-001735895	GCA-001735895	JACNJF01
M39	Aegir_M39_B67	HCGIIHJE_19.region001	RiPP	RiPP-like	159.173	1982.03	3.29711	Bacteria	Bacteroidota	Bacteroidia	Flavobacteriales	Flavobacteriaceae	S010-17
M39	Aegir_M39_B192	HEEDOPCH_161.region001	RiPP	RiPP-like	243.496	3032.02	3.48173	Bacteria	Pseudomonadota	Gammaproteobacteria	Methylococcales	Methylomonadaceae	QPIN01
M39	Aegir_M39_B192	HEEDOPCH_64.region001	RiPP	RiPP-like	275.341	3428.55	3.53511	Bacteria	Pseudomonadota	Gammaproteobacteria	Methylococcales	Methylomonadaceae	QPIN01
M39	Aegir_M39_B136	IGJLCKIK_8.region002	RiPP	RiPP-like	153.156	1907.1	3.28037	Bacteria	Bacteroidota	Bacteroidia	Bacteroidales	F082	UBA4459
M39	Aegir_M39_B40	JEICAJEH_18.region001	RiPP	RiPP-like	424.371	5284.28	3.72299	Bacteria	Pseudomonadota	Gammaproteobacteria	Enterobacterales_A	GCA-002770795	DRNA01
M39	Aegir_M39_B40	JEICAJEH_66.region001	RiPP	RiPP-like	1063.85	13247.1	4.12212	Bacteria	Pseudomonadota	Gammaproteobacteria	Enterobacterales_A	GCA-002770795	DRNA01
M39	Aegir_M39_B186	JNBGNNLM_229.region001	RiPP	RiPP-like	153.071	1906.05	3.28013	Bacteria	Pseudomonadota	Gammaproteobacteria	Methylococcales	Methylomonadaceae	QPIN01
M39	Aegir_M39_B186	JNBGNNLM_315.region001	RiPP	RiPP-like	306.538	3817.02	3.58172	Bacteria	Pseudomonadota	Gammaproteobacteria	Methylococcales	Methylomonadaceae	QPIN01
M39	Aegir_M39_B84	KCHELPBI_228.region001	RiPP	RiPP-like	1019.41	12693.7	4.10359	Bacteria	Desulfobacterota	Desulfofervidia	Desulfofervidales	Desulfofervidaceae	Desulfofervidus
M39	Aegir_M39_B98	KEGBFKGK_47.region001	RiPP	RiPP-like	566.552	7054.72	3.84848	Bacteria	Desulfobacterota	Desulfobacteria	Desulfobacterales	JAFDDL01
M39	Aegir_M39_B199	KEIMIPLH_50.region001	RiPP	RiPP-like	334.905	4170.25	3.62016	Bacteria	Bacteroidota	Bacteroidia	Flavobacteriales	Flavobacteriaceae
M39	Aegir_M39_B182	LIPJKAHJ_36.region001	RiPP	RiPP-like	611.778	7617.88	3.88183	Bacteria	Pseudomonadota	Alphaproteobacteria	Rhodobacterales	Rhodobacteraceae	Profundibacter	Profundibacter amoris
M39	Aegir_M39_B43	LPCKDOMF_14.region001	RiPP	RiPP-like	285.712	3557.7	3.55117	Bacteria	Campylobacterota	Campylobacteria	Campylobacterales	Sulfurimonadaceae	Sulfurimonas
M39	Aegir_M39_B8	MAHBBFHA_230.region001	RiPP	RiPP-like	359.008	4470.38	3.65034	Bacteria	Campylobacterota	Campylobacteria	Campylobacterales	Sulfurospirillaceae	Sulfurospirillum_A
M39	Aegir_M39_B39	NPMBOLIF_4.region001	RiPP	RiPP-like	171.18	2131.54	3.32869	Bacteria	Myxococcota_A	UBA9160	UBA9160	UBA4427	UBA4427
M39	Aegir_M39_B71	OEDHKPFD_120.region001	RiPP	RiPP-like	196.189	2442.95	3.38791	Bacteria	Pseudomonadota	Gammaproteobacteria	Methylococcales	Methylomonadaceae	QPIN01	QPIN01 sp021647585
M39	Aegir_M39_B146	OICIJIOO_39.region001	RiPP	RiPP-like	612.285	7624.2	3.88219	Bacteria	Pseudomonadota	Gammaproteobacteria	Methylococcales	Methylomonadaceae
M39	Aegir_M39_B180	PILMEDLM_25.region001	RiPP	RiPP-like	141.602	1763.23	3.24631	Bacteria	Desulfobacterota	DSM-4660	Desulfatiglandales	Desulfatiglandaceae	B111-G9
M39	Aegir_M39_B180	PILMEDLM_80.region001	RiPP	RiPP-like	141.204	1758.28	3.24509	Bacteria	Desulfobacterota	DSM-4660	Desulfatiglandales	Desulfatiglandaceae	B111-G9
M33	Barite_M33_B87	BAIALBNB_73.region001	RiPP	RiPP-like	151.581	1554.26	3.19152	Bacteria	Pseudomonadota	Gammaproteobacteria	Xanthomonadales	SZUA-36	SZUA-36
M33	Barite_M33_B61	CAOEPHBC_22.region001	RiPP	RiPP-like	132.299	1356.55	3.13244	Bacteria	Campylobacterota	Campylobacteria	Campylobacterales	Sulfurovaceae	Sulfurovum
M33	Barite_M33_B30	COHBHEGN_43.region001	RiPP	RiPP-like	454.698	4662.32	3.6686	Bacteria	Bacteroidota	Bacteroidia	Flavobacteriales	Flavobacteriaceae	Urechidicola
M33	Barite_M33_B14	DBOFCDMG_77.region001	RiPP	RiPP-like	431.692	4426.42	3.64605	Bacteria	Campylobacterota	Campylobacteria	Campylobacterales	Sulfurovaceae	Sulfurovum
M33	Barite_M33_B67	DLFDEKGP_30.region001	RiPP	RiPP-like	161.43	1655.25	3.21886	Bacteria	Pseudomonadota	Alphaproteobacteria	UBA1280	UBA2136
M33	Barite_M33_B96	EGMJLMEO_151.region001	RiPP	RiPP-like	440.572	4517.47	3.6549	Bacteria	Pseudomonadota	Alphaproteobacteria	UBA1280	UBA2136
M33	Barite_M33_B89	EMEEGMFL_223.region001	RiPP	RiPP-like	143.366	1470.02	3.16732	Bacteria	Pseudomonadota	Gammaproteobacteria	Enterobacterales	Alteromonadaceae	JABSOG01
M33	Barite_M33_B107	EMINPHIH_29.region001	RiPP	RiPP-like	132.232	1355.86	3.13221	Bacteria	Pseudomonadota	Gammaproteobacteria	Nitrosococcales	Methylophagaceae	GCA-002733105
M33	Barite_M33_B97	FAPGKHBG_6.region001	RiPP	RiPP-like	406.97	4172.94	3.62044	Bacteria	Pseudomonadota	Gammaproteobacteria	Xanthomonadales	Marinicellaceae	NORP309
M33	Barite_M33_B69	FHIEFOOH_4.region001	RiPP	RiPP-like	132.911	1362.82	3.13444	Bacteria	Pseudomonadota	Gammaproteobacteria	Arenicellales	Arenicellaceae	Arenicella	Arenicella sp016763815
M33	Barite_M33_B99	HIDEMPIF_53.region001	RiPP	RiPP-like	199.845	2049.14	3.31157	Bacteria	Pseudomonadota	Gammaproteobacteria	Chromatiales	Sedimenticolaceae
M33	Barite_M33_B23	JICMBPMM_115.region001	RiPP	RiPP-like	36661	375910	5.57508	Bacteria	Pseudomonadota	Gammaproteobacteria	Methylococcales	Methylomonadaceae	WTBX01
M33	Barite_M33_B23	JICMBPMM_6.region001	RiPP	RiPP-like	1860.15	19073.3	4.28043	Bacteria	Pseudomonadota	Gammaproteobacteria	Methylococcales	Methylomonadaceae	WTBX01
M33	Barite_M33_B10	JLLMDFFJ_140.region001	RiPP	RiPP-like	620.87	6366.19	3.80388	Bacteria	Pseudomonadota	Gammaproteobacteria	Pseudomonadales	Azotimanducaceae_A	JAHRVQ01
M33	Barite_M33_B38	JMMHIICP_3.region001	RiPP	RiPP-like	239.666	2457.45	3.39049	Bacteria	Pseudomonadota	Gammaproteobacteria	Enterobacterales	Kangiellaceae	GCA-002733465
M33	Barite_M33_B106	LFCNJEPG_12.region002	RiPP	RiPP-like	132.265	1356.2	3.13233	Bacteria	Pseudomonadota	Gammaproteobacteria	QNFE01
M33	Barite_M33_B106	LFCNJEPG_1.region001	RiPP	RiPP-like	168.727	1730.07	3.23806	Bacteria	Pseudomonadota	Gammaproteobacteria	QNFE01
M33	Barite_M33_B106	LFCNJEPG_4.region001	RiPP	RiPP-like	285.782	2930.31	3.46691	Bacteria	Pseudomonadota	Gammaproteobacteria	QNFE01
M33	Barite_M33_B58	LMIOODIL_312.region001	RiPP	RiPP-like	217.509	2230.26	3.34836	Bacteria	Myxococcota	Bradymonadia	UBA4248
M33	Barite_M33_B6	LPIDFHMF_71.region001	RiPP	RiPP-like	268.975	2757.98	3.44059	Bacteria	Pseudomonadota	Gammaproteobacteria	Methylococcales	Methylomonadaceae	QPIN01
M33	Barite_M33_B45	MEICBBJD_174.region001	RiPP	RiPP-like	1373.55	14083.9	4.14872	Bacteria	Pseudomonadota	Gammaproteobacteria	GCA-001735895	GCA-001735895
M33	Barite_M33_B45	MEICBBJD_38.region001	RiPP	RiPP-like	336.467	3450.02	3.53782	Bacteria	Pseudomonadota	Gammaproteobacteria	GCA-001735895	GCA-001735895
M33	Barite_M33_B32	MFEMIGBH_88.region001	RiPP	RiPP-like	255.73	2622.17	3.41866	Bacteria	Pseudomonadota	Gammaproteobacteria	GCA-001735895	GCA-001735895
M33	Barite_M33_B72	MLFEBKFB_353.region001	RiPP	RiPP-like	1985.25	20356.1	4.30869	Bacteria	Pseudomonadota	Alphaproteobacteria	Sphingomonadales	SMXR01	CAKZLM01
M33	Barite_M33_B101	MNIOLPGK_192.region001	RiPP	RiPP-like	929.446	9530.23	3.9791	Bacteria	Bacteroidota	Bacteroidia	Flavobacteriales	Flavobacteriaceae	S010-17
M33	Barite_M33_B20	NGKECJEJ_235.region001	RiPP	RiPP-like	570.933	5854.15	3.76746	Bacteria	Pseudomonadota	Alphaproteobacteria	Sphingomonadales	Kordiimonadaceae	Kordiimonas
M25	Aegir_M25_B215	DBLJEKIA_312.region001	RiPP	RRE-containing	5030.94	42065	4.62392	Bacteria	Chloroflexota	Anaerolineae	Promineifilales	Promineifilaceae	JAJRTP01
M36	Aegir_M36_B53	IDFHELPL_36.region001	RiPP	RRE-containing	1006.37	7028.88	3.84689	Bacteria	Campylobacterota	Campylobacteria	Campylobacterales	Sulfurovaceae	Sulfurovum
M36	Aegir_M36_B57	IIFEMMGK_195.region001	RiPP	RRE-containing	7071.44	49389.7	4.69364	Bacteria	Campylobacterota	Campylobacteria	Campylobacterales	Sulfurovaceae	Sulfurovum
M36	Aegir_M36_B62	NDIICOJF_21.region001	RiPP	RRE-containing	1007.86	7039.29	3.84753	Bacteria	Bacteroidota	Bacteroidia	Bacteroidales	UBA12170	UBA12170
M38	Aegir_M38_B98	BFAFEAIL_8.region001	RiPP	RRE-containing	339.893	5059.31	3.70409	Bacteria	Pseudomonadota	Gammaproteobacteria	Xanthomonadales	Marinicellaceae	NORP309
M38	Aegir_M38_B8	EBIDJMJL_43.region001	RiPP	RRE-containing	187.16	2785.87	3.44496	Bacteria	Bacteroidota	Bacteroidia	Flavobacteriales	Flavobacteriaceae	Lutimonas
M38	Aegir_M38_B19	ECPBKFON_167.region001	RiPP	RRE-containing	231.065	3439.4	3.53648	Bacteria	Pseudomonadota	Zetaproteobacteria	Mariprofundales	Mariprofundaceae	AB-137-C09
M38	Aegir_M38_B44	FIGLHJNH_83.region001	RiPP	RRE-containing	313.742	4670.05	3.66932	Bacteria	Campylobacterota	Campylobacteria	Campylobacterales	Sulfurimonadaceae	Sulfurimonas
M38	Aegir_M38_B105	GECPGONF_22.region001	RiPP	RRE-containing	156.546	2330.19	3.36739	Bacteria	Campylobacterota	Campylobacteria	Campylobacterales	Sulfurovaceae	Sulfurovum
M38	Aegir_M38_B92	HJJGMEJB_51.region001	RiPP	RRE-containing	231.841	3450.95	3.53794	Bacteria	Campylobacterota	Campylobacteria	Campylobacterales	Sulfurimonadaceae	Sulfurimonas
M38	Aegir_M38_B87	ICAEBNNE_140.region001	RiPP	RRE-containing	210.002	3125.88	3.49497	Bacteria	UBP6	JAFGXH01	JAFGXH01	JAFGXH01
M38	Aegir_M38_B13	JGAODFDO_11.region001	RiPP	RRE-containing	156.523	2329.85	3.36733	Bacteria	Pseudomonadota	Gammaproteobacteria	Chromatiales	Sedimenticolaceae
M38	Aegir_M38_B91	KMNIKALC_87.region001	RiPP	RRE-containing	355.857	5296.93	3.72402	Bacteria	Pseudomonadota	Zetaproteobacteria	Mariprofundales	Mariprofundaceae	GCA-2401635
M39	Aegir_M39_B93	AMDMEECB_4.region001	RiPP	RRE-containing	6140.09	76456.6	4.88341	Bacteria	Campylobacterota	Campylobacteria	Campylobacterales	Sulfurovaceae	Sulfurovum
M39	Aegir_M39_B17	CBJJPFKK_32.region001	RiPP	RRE-containing	82.0838	1022.11	3.0095	Bacteria	Aquificota	Aquificae	Hydrogenothermales	Hydrogenothermaceae	Persephonella
M39	Aegir_M39_B160	ENHKGPJA_29.region001	RiPP	RRE-containing	402.016	5005.92	3.69948	Bacteria	Pseudomonadota	Gammaproteobacteria	Arenicellales	LS-SOB	JAAELZ01
M39	Aegir_M39_B74	EPGHDDAG_38.region001	RiPP	RRE-containing	120.73	1503.34	3.17706	Bacteria	WOR-3	Hydrothermia
M39	Aegir_M39_B195	GJNOLOFI_271.region001	RiPP	RRE-containing	478.574	5959.22	3.77519	Bacteria	Desulfobacterota	DSM-4660	Desulfatiglandales	Desulfatiglandaceae	Desulfacyla
M39	Aegir_M39_B100	HPDNPIEA_4.region001	RiPP	RRE-containing	419.954	5229.29	3.71844	Bacteria	Myxococcota	B64-G9	B64-G9	B64-G9
M39	Aegir_M39_B109	ICBCKKKK_16.region001	RiPP	RRE-containing	115.156	1433.93	3.15653	Bacteria	Bacteroidota	Bacteroidia	Bacteroidales	JAADJA01	JAADJA01
M39	Aegir_M39_B121	JGGEIKLM_42.region001	RiPP	RRE-containing	82.0473	1021.66	3.0093	Bacteria	Bacteroidota	Bacteroidia	Flavobacteriales	Flavobacteriaceae	GCA-002733185
M39	Aegir_M39_B98	KEGBFKGK_93.region001	RiPP	RRE-containing	162.936	2028.88	3.30726	Bacteria	Desulfobacterota	Desulfobacteria	Desulfobacterales	JAFDDL01
M39	Aegir_M39_B199	KEIMIPLH_314.region001	RiPP	RRE-containing	243.853	3036.47	3.48237	Bacteria	Bacteroidota	Bacteroidia	Flavobacteriales	Flavobacteriaceae
M39	Aegir_M39_B144	LEDLLEGN_43.region001	RiPP	RRE-containing	631.068	7858.09	3.89532	Bacteria	Pseudomonadota	Gammaproteobacteria	Chromatiales	Sedimenticolaceae	Thiolapillus
M39	Aegir_M39_B159	LKLMGDAM_249.region001	RiPP	RRE-containing	510.332	6354.67	3.80309	Bacteria	Planctomycetota	SZUA-567	JAFGGJ01	JAFGGJ01
M39	Aegir_M39_B137	MGGLONMC_113.region001	RiPP	RRE-containing	396.522	4937.51	3.69351	Bacteria	Bacteroidota	Bacteroidia	Flavobacteriales	Flavobacteriaceae	Lutimonas
M39	Aegir_M39_B194	MHOBFLEE_173.region001	RiPP	RRE-containing	422.25	5257.87	3.72081	Bacteria	Desulfobacterota	Desulfobacteria	Desulfobacterales	UBA11574
M39	Aegir_M39_B88	OGCDBPDJ_176.region001	RiPP	RRE-containing	134.298	1672.28	3.22331	Bacteria	Acidobacteriota	Polarisedimenticolia	J045	J045
M39	Aegir_M39_B3	OHFHPIDA_75.region001	RiPP	RRE-containing	121.525	1513.24	3.17991	Bacteria	Chloroflexota	Anaerolineae	Promineofilales	Promineofilaceae	S016-13
M39	Aegir_M39_B63	PMCGENNM_89.region001	RiPP	RRE-containing	89.9854	1120.5	3.04941	Bacteria	Bacteroidota	Ignavibacteria	Ignavibacteriales	Melioribacteraceae	GCA-2746605
M33	Barite_M33_B14	DBOFCDMG_58.region001	RiPP	RRE-containing	450.042	4614.58	3.66413	Bacteria	Campylobacterota	Campylobacteria	Campylobacterales	Sulfurovaceae	Sulfurovum
M33	Barite_M33_B13	DOFEOPKJ_456.region001	RiPP	RRE-containing	211.841	2172.15	3.33689	Bacteria	Pseudomonadota	Gammaproteobacteria	Chromatiales	Chromatiaceae	Thiosymbion
M33	Barite_M33_B97	FAPGKHBG_279.region001	RiPP	RRE-containing	588.961	6039.01	3.78097	Bacteria	Pseudomonadota	Gammaproteobacteria	Xanthomonadales	Marinicellaceae	NORP309
M33	Barite_M33_B69	FHIEFOOH_223.region001	RiPP	RRE-containing	394.21	4042.1	3.60661	Bacteria	Pseudomonadota	Gammaproteobacteria	Arenicellales	Arenicellaceae	Arenicella	Arenicella sp016763815
M33	Barite_M33_B36	KPIBPLGM_289.region001	RiPP	RRE-containing	193.519	1984.28	3.2976	Bacteria	Pseudomonadota	Alphaproteobacteria	Rhodobacterales	Rhodobacteraceae	UBA3077
M24	Aegir_M24_B72	AMCEHCFD_117.region001	Polyketide	T1PKS	481.765	8656.11	3.93732	Bacteria	Bacteroidota	Bacteroidia	Flavobacteriales	Crocinitomicaceae	Crocinitomix
M24	Aegir_M24_B51	CLBBIEOL_167.region001	Polyketide	T1PKS	153.469	2757.46	3.44051	Bacteria	Bacteroidota	Bacteroidia	Cytophagales	Cyclobacteriaceae
M24	Aegir_M24_B61	JFGKALPH_198.region001	Polyketide	T1PKS	1341.9	24110.6	4.38221	Bacteria	Bacteroidota	Bacteroidia	Cytophagales	Bernardetiaceae
M24	Aegir_M24_B27	MGMOCMNP_146.region001	Polyketide	T1PKS	641.031	11517.7	4.06137	Bacteria	Bacteroidota	Bacteroidia	Cytophagales	Bernardetiaceae
M24	Aegir_M24_B27	MGMOCMNP_205.region001	Polyketide	T1PKS	2355.39	42320.5	4.62655	Bacteria	Bacteroidota	Bacteroidia	Cytophagales	Bernardetiaceae
M24	Aegir_M24_B62	OOCMFLME_19.region001	Polyketide	T1PKS	407.41	7320.14	3.86452	Bacteria	Pseudomonadota	Gammaproteobacteria	Methylococcales	Methylomonadaceae	QPIN01
M25	Aegir_M25_B239	IEDIOMHP_46.region001	Polyketide	T1PKS	1669.05	13955.3	4.14474	Bacteria	Myxococcota	UBA796	UBA796	UBA2385	J125
M38	Aegir_M38_B21	NIMPLCKH_142.region001	Polyketide	T1PKS	825.001	12280.1	4.0892	Bacteria	Pseudomonadota	Gammaproteobacteria	Methylococcales	Methylomonadaceae	QPIN01
M39	Aegir_M39_B196	BKLBJKCE_20.region001	Polyketide	T1PKS	189.605	2360.97	3.37309	Bacteria	Desulfobacterota	Desulfobacteria	Desulfobacterales	JAABRJ01
M39	Aegir_M39_B150	GLJOBBPH_377.region001	Polyketide	T1PKS	320.527	3991.21	3.6011	Bacteria	Pseudomonadota	Gammaproteobacteria	Beggiatoales	Beggiatoaceae	Thiomargarita
M39	Aegir_M39_B102	HHBKGBCH_84.region001	Polyketide	T1PKS	129.19	1608.68	3.20647	Bacteria	Pseudomonadota	Alphaproteobacteria	Rhodobacterales	Rhodobacteraceae	Oceanicella
M39	Aegir_M39_B73	HLAJGKCK_405.region001	Polyketide	T1PKS	154.812	1927.72	3.28504	Bacteria	Myxococcota	UBA796	UBA796	GCA-2862545	JACKEQ01
M39	Aegir_M39_B98	KEGBFKGK_79.region001	Polyketide	T1PKS	69.4684	865.024	2.93703	Bacteria	Desulfobacterota	Desulfobacteria	Desulfobacterales	JAFDDL01
M39	Aegir_M39_B119	MHCCPFAL_41.region001	Polyketide	T1PKS	217.967	2714.14	3.43363	Bacteria	Pseudomonadota	Gammaproteobacteria	Methylococcales	Methylomonadaceae	QPIN01
M39	Aegir_M39_B39	NPMBOLIF_68.region001	Polyketide	T1PKS	55.0772	685.824	2.83621	Bacteria	Myxococcota_A	UBA9160	UBA9160	UBA4427	UBA4427
M39	Aegir_M39_B71	OEDHKPFD_155.region001	Polyketide	T1PKS	169.072	2105.29	3.32331	Bacteria	Pseudomonadota	Gammaproteobacteria	Methylococcales	Methylomonadaceae	QPIN01	QPIN01 sp021647585
M33	Barite_M33_B36	KPIBPLGM_265.region001	Polyketide	T1PKS	78.6106	806.047	2.90636	Bacteria	Pseudomonadota	Alphaproteobacteria	Rhodobacterales	Rhodobacteraceae	UBA3077
M25	Aegir_M25_B87	DKBJNFLL_178.region001	Polyketide	T3PKS	1587.61	13274.5	4.12302	Bacteria	Myxococcota	Polyangia	Polyangiales	SG8-38	JALVDI01
M38	Aegir_M38_B64	NAOKMLNH_87.region001	Polyketide	T3PKS	290.954	4330.85	3.63657	Bacteria	Bdellovibrionota	Oligoflexia	Oligoflexales
M39	Aegir_M39_B25	IAPKAMMO_177.region001	Polyketide	T3PKS	137.722	1714.92	3.23424	Bacteria	Planctomycetota	JADGBV01	JADGBV01	JADGBV01
M39	Aegir_M39_B15	JKANDIBI_16.region001	Polyketide	T3PKS	71.8886	895.16	2.9519	Bacteria	KSB1	UBA2214	UBA2214	Zgenome-0027	JAJRST01
M39	Aegir_M39_B155	KKPGHLON_124.region001	Polyketide	T3PKS	148.448	1848.48	3.26681	Bacteria	Planctomycetota	UBA1135	UBA2386	GCA-002748355	JAJRTL01
M24	Aegir_M24_B122	FDEIFABP_48.region001	Terpene	Terpene generic	604.807	10866.9	4.0361	Bacteria	Pseudomonadota	Gammaproteobacteria	Methylococcales	Methylomonadaceae	Methyloprofundus
M24	Aegir_M24_B58	GNKANFNI_21.region001	Terpene	Terpene generic	2762.39	49633.2	4.69577	Bacteria	Pseudomonadota	Gammaproteobacteria	Methylococcales	Methylomonadaceae	WTBX01
M24	Aegir_M24_B58	GNKANFNI_74.region001	Terpene	Terpene generic	3948.59	70946.4	4.85093	Bacteria	Pseudomonadota	Gammaproteobacteria	Methylococcales	Methylomonadaceae	WTBX01
M24	Aegir_M24_B13	HMPFCKPD_81.region001	Terpene	Terpene generic	325.842	5854.56	3.76749	Bacteria	Pseudomonadota	Gammaproteobacteria	Beggiatoales	Beggiatoaceae
M24	Aegir_M24_B130	KOFGBFOK_5.region001	Terpene	Terpene generic	245.245	4406.44	3.64409	Bacteria	Pseudomonadota	Gammaproteobacteria	Methylococcales	Methylomonadaceae	JALSJK01
M24	Aegir_M24_B75	NCJJNLBN_60.region001	Terpene	Terpene generic	784.649	14098.2	4.14916	Bacteria	Pseudomonadota	Gammaproteobacteria	Methylococcales	Methylomonadaceae	WTBX01
M25	Aegir_M25_B191	DOFINDKD_24.region001	Terpene	Terpene generic	3851.93	32207	4.50795	Bacteria	Pseudomonadota	Gammaproteobacteria	Methylococcales	Methylomonadaceae	Methylomarinum
M25	Aegir_M25_B17	EFPKCKDP_32.region001	Terpene	Terpene generic	5050.76	42230.7	4.62563	Bacteria	Desulfobacterota	DSM-4660	Desulfatiglandales	JALVZP01
M36	Aegir_M36_B40	MACFFGIF_25.region001	Terpene	Terpene generic	1066.93	7451.83	3.87226	Bacteria	Pseudomonadota	Gammaproteobacteria	Methylococcales	Methylomonadaceae	Methyloprofundus
M36	Aegir_M36_B41	ONIHFDBF_122.region001	Terpene	Terpene generic	914.139	6384.71	3.80514	Bacteria	Pseudomonadota	Gammaproteobacteria	Methylococcales	Methylomonadaceae	Methyloprofundus	Methyloprofundus sp900128525
M38	Aegir_M38_B26	BHAGBGDA_124.region001	Terpene	Terpene generic	182.176	2711.69	3.43324	Bacteria	Pseudomonadota	Gammaproteobacteria	Methylococcales	Methylomonadaceae	Methyloprofundus
M38	Aegir_M38_B72	JLHIKFCN_50.region001	Terpene	Terpene generic	5002.44	74461.2	4.87193	Bacteria	Pseudomonadota	Gammaproteobacteria	Methylococcales	Methylomonadaceae	WTBX01
M38	Aegir_M38_B91	KMNIKALC_28.region001	Terpene	Terpene generic	2953.12	43957.1	4.64303	Bacteria	Pseudomonadota	Zetaproteobacteria	Mariprofundales	Mariprofundaceae	GCA-2401635
M38	Aegir_M38_B84	LMKJOADE_26.region001	Terpene	Terpene generic	3808.85	56694.7	4.75354	Bacteria	Pseudomonadota	Gammaproteobacteria
M38	Aegir_M38_B21	NIMPLCKH_23.region001	Terpene	Terpene generic	319.859	4761.1	3.67771	Bacteria	Pseudomonadota	Gammaproteobacteria	Methylococcales	Methylomonadaceae	QPIN01
M39	Aegir_M39_B178	AIAADNBJ_43.region001	Terpene	Terpene generic	75.9582	945.834	2.97582	Bacteria	Planctomycetota	UBA1135	UBA1135	GCA-002686595	RBC036
M39	Aegir_M39_B110	BFEMGKGJ_104.region001	Terpene	Terpene generic	99.7915	1242.61	3.09433	Bacteria	Myxococcota	Polyangia	Haliangiales	Haliangiaceae	NORP324
M39	Aegir_M39_B23	CIBCBEEE_122.region001	Terpene	Terpene generic	615.119	7659.49	3.8842	Bacteria	Pseudomonadota	Gammaproteobacteria	Methylococcales	Methylomonadaceae
M39	Aegir_M39_B51	DKEELOGD_73.region001	Terpene	Terpene generic	726.971	9052.28	3.95676	Bacteria	Desulfobacterota	DSM-4660	Desulfatiglandales	Desulfatiglandaceae
M39	Aegir_M39_B149	EDJGDHEF_16.region001	Terpene	Terpene generic	462.517	5759.28	3.76037	Bacteria	Pseudomonadota	Gammaproteobacteria	Methylococcales	Methylomonadaceae	Methylomarinum
M39	Aegir_M39_B120	EEAGJODL_140.region001	Terpene	Terpene generic	108.09	1345.94	3.12903	Bacteria	Myxococcota	Bradymonadia	Bradymonadales	Bradymonadaceae
M39	Aegir_M39_B191	EEGHMLPD_256.region001	Terpene	Terpene generic	3466.04	43159.3	4.63507	Bacteria	Pseudomonadota	Gammaproteobacteria	Methylococcales	Methylomonadaceae	Methyloprofundus	Methyloprofundus sp900128525
M39	Aegir_M39_B111	EOABJBEP_350.region001	Terpene	Terpene generic	202.527	2521.88	3.40172	Bacteria	Pseudomonadota	Gammaproteobacteria	CAJXQU01	CAJXQU01	CAJXQU01
M39	Aegir_M39_B170	FJOFPHMJ_17.region001	Terpene	Terpene generic	152.341	1896.96	3.27806	Bacteria	Bacteroidota	Kapabacteria	Kapabacteriales	UBA2268
M39	Aegir_M39_B123	GAPCFIGP_97.region001	Terpene	Terpene generic	133.221	1658.87	3.21981	Bacteria	Desulfobacterota	DSM-4660	Desulfatiglandales	Desulfatiglandaceae	B46-G9
M39	Aegir_M39_B150	GLJOBBPH_145.region001	Terpene	Terpene generic	105.482	1313.47	3.11842	Bacteria	Pseudomonadota	Gammaproteobacteria	Beggiatoales	Beggiatoaceae	Thiomargarita
M39	Aegir_M39_B150	GLJOBBPH_160.region001	Terpene	Terpene generic	147.8	1840.42	3.26492	Bacteria	Pseudomonadota	Gammaproteobacteria	Beggiatoales	Beggiatoaceae	Thiomargarita
M39	Aegir_M39_B192	HEEDOPCH_110.region001	Terpene	Terpene generic	706.091	8792.27	3.9441	Bacteria	Pseudomonadota	Gammaproteobacteria	Methylococcales	Methylomonadaceae	QPIN01
M39	Aegir_M39_B102	HHBKGBCH_70.region001	Terpene	Terpene generic	82.7338	1030.2	3.01292	Bacteria	Pseudomonadota	Alphaproteobacteria	Rhodobacterales	Rhodobacteraceae	Oceanicella
M39	Aegir_M39_B112	ICNECMED_135.region001	Terpene	Terpene generic	332.758	4143.52	3.61737	Bacteria	Calditrichota	Calditrichia	Calditrichales	Calditrichaceae	JANTFQ01
M39	Aegir_M39_B60	IGDGJELM_46.region001	Terpene	Terpene generic	79.0713	984.599	2.99326	Bacteria	Myxococcota	B64-G9	B64-G9	B64-G9
M39	Aegir_M39_B60	IGDGJELM_46.region002	Terpene	Terpene generic	75.8057	943.935	2.97494	Bacteria	Myxococcota	B64-G9	B64-G9	B64-G9
M39	Aegir_M39_B44	IPKLMCOG_23.region001	Terpene	Terpene generic	210.376	2619.61	3.41824	Bacteria	Bipolaricaulota	Bipolaricaulia	Bipolaricaulales	Bipolaricaulaceae	UBA3574
M39	Aegir_M39_B188	JCKFNMMM_332.region001	Terpene	Terpene generic	103.808	1292.62	3.11147	Bacteria	Myxococcota	JAADFL01	JAADFL01	JAADFL01
M39	Aegir_M39_B40	JEICAJEH_25.region001	Terpene	Terpene generic	263.56	3281.86	3.51612	Bacteria	Pseudomonadota	Gammaproteobacteria	Enterobacterales_A	GCA-002770795	DRNA01
M39	Aegir_M39_B92	JHHPGEIM_237.region001	Terpene	Terpene generic	172.926	2153.28	3.3331	Bacteria	Desulfobacterota_F	DSWW01	DSWW01	DSWW01	S015-6
M39	Aegir_M39_B186	JNBGNNLM_104.region001	Terpene	Terpene generic	177.718	2212.95	3.34497	Bacteria	Pseudomonadota	Gammaproteobacteria	Methylococcales	Methylomonadaceae	QPIN01
M39	Aegir_M39_B98	KEGBFKGK_100.region001	Terpene	Terpene generic	223.646	2784.85	3.4448	Bacteria	Desulfobacterota	Desulfobacteria	Desulfobacterales	JAFDDL01
M39	Aegir_M39_B98	KEGBFKGK_61.region001	Terpene	Terpene generic	79.1052	985.021	2.99345	Bacteria	Desulfobacterota	Desulfobacteria	Desulfobacterales	JAFDDL01
M39	Aegir_M39_B134	LCJGCDAJ_79.region001	Terpene	Terpene generic	396.83	4941.34	3.69384	Bacteria	Pseudomonadota	Gammaproteobacteria	Methylococcales	Methylothermaceae	Methylohalobius
M39	Aegir_M39_B182	LIPJKAHJ_11.region001	Terpene	Terpene generic	116.423	1449.71	3.16128	Bacteria	Pseudomonadota	Alphaproteobacteria	Rhodobacterales	Rhodobacteraceae	Profundibacter	Profundibacter amoris
M39	Aegir_M39_B39	NPMBOLIF_29.region001	Terpene	Terpene generic	72.2953	900.224	2.95435	Bacteria	Myxococcota_A	UBA9160	UBA9160	UBA4427	UBA4427
M39	Aegir_M39_B146	OICIJIOO_58.region001	Terpene	Terpene generic	913.667	11377	4.05603	Bacteria	Pseudomonadota	Gammaproteobacteria	Methylococcales	Methylomonadaceae
M39	Aegir_M39_B164	PNPOMJDI_2.region001	Terpene	Terpene generic	79.173	985.866	2.99382	Bacteria	Myxococcota	Polyangia	Haliangiales	Haliangiaceae	NORP324
M33	Barite_M33_B62	AGFGDEPP_25.region001	Terpene	Terpene generic	74.4889	763.784	2.88297	Bacteria	Pseudomonadota	Alphaproteobacteria	Sphingomonadales	Emcibacteraceae	Paremcibacter
M33	Barite_M33_B113	BMEKDGJI_104.region001	Terpene	Terpene generic	86.4585	886.517	2.94769	Bacteria	Pseudomonadota	Gammaproteobacteria	Beggiatoales	Beggiatoaceae
M33	Barite_M33_B95	FMFMJIIM_50.region001	Terpene	Terpene generic	723.239	7415.85	3.87016	Bacteria	Pseudomonadota	Alphaproteobacteria	Micavibrionales	Micavibrionaceae	UBA1850
M33	Barite_M33_B23	JICMBPMM_48.region001	Terpene	Terpene generic	892.582	9152.23	3.96153	Bacteria	Pseudomonadota	Gammaproteobacteria	Methylococcales	Methylomonadaceae	WTBX01
M33	Barite_M33_B8	KFCJGCLI_112.region001	Terpene	Terpene generic	102.084	1046.73	3.01984	Bacteria	Pseudomonadota	Alphaproteobacteria	Micavibrionales	Micavibrionaceae	UBA1850
M33	Barite_M33_B58	LMIOODIL_241.region001	Terpene	Terpene generic	140.83	1444.03	3.15958	Bacteria	Myxococcota	Bradymonadia	UBA4248
M33	Barite_M33_B72	MLFEBKFB_177.region001	Terpene	Terpene generic	105.231	1079.01	3.03302	Bacteria	Pseudomonadota	Alphaproteobacteria	Sphingomonadales	SMXR01	CAKZLM01
M33	Barite_M33_B35	MMHLBHKL_130.region001	Terpene	Terpene generic	113.343	1162.18	3.06527	Bacteria	Pseudomonadota	Gammaproteobacteria	Methylococcales	Methylomonadaceae	Methyloprofundus
M33	Barite_M33_B20	NGKECJEJ_179.region001	Terpene	Terpene generic	363.709	3729.35	3.57163	Bacteria	Pseudomonadota	Alphaproteobacteria	Sphingomonadales	Kordiimonadaceae	Kordiimonas
M33	Barite_M33_B73	NNFODOML_37.region001	Terpene	Terpene generic	74.4889	763.784	2.88297	Bacteria	Pseudomonadota	Alphaproteobacteria	Rhizobiales	OSC116	OCS116
M33	Barite_M33_B5	OOHDNELP_286.region001	Terpene	Terpene generic	867.322	8893.23	3.94906	Bacteria	Nitrospirota	Nitrospiria	Nitrospirales	UBA8639	UBA8639
M33	Barite_M33_B21	PKDJBPAN_8.region001	Terpene	Terpene generic	73.4738	753.375	2.87701	Bacteria	Bacteroidota	Bacteroidia	Cytophagales	Cyclobacteriaceae	Roseivirga
M24	Aegir_M24_B73	CBMKINBK_66.region001	Hybrid	thioamide:arylpolyene	92.4497	1661.09	3.22039	Bacteria	Pseudomonadota	Gammaproteobacteria	Thiotrichales	Thiotrichaceae	HyVt-477
M38	Aegir_M38_B90	NBPCDCCG_10.region001	RiPP	thioamitides	424.554	6319.48	3.80068	Archaea	Halobacteriota	Syntropharchaeia	ANME-1	ANME-1	JANPRD01
M25	Aegir_M25_B144	BIHIBKCH_38.region001	RiPP	thiopeptide	1241.34	10379.1	4.01616	Bacteria	Pseudomonadota	Gammaproteobacteria	Thiotrichales	Thiotrichaceae	Cocleimonas
M38	Aegir_M38_B79	CGJFFKOE_1.region001	RiPP	thiopeptide	648.437	9651.97	3.98462	Bacteria	Desulfobacterota	Thermodesulfobacteria	Thermodesulfobacteriales	Thermodesulfobacteriaceae	Thermodesulfobacterium
M38	Aegir_M38_B66	EMLCJMHO_35.region001	RiPP	thiopeptide	296.733	4416.87	3.64511	Bacteria	Desulfobacterota	Desulfobulbia	Desulfobulbales	Desulfurivibrionaceae
M38	Aegir_M38_B87	ICAEBNNE_5.region001	RiPP	thiopeptide	198.723	2957.99	3.471	Bacteria	UBP6	JAFGXH01	JAFGXH01	JAFGXH01
M39	Aegir_M39_B69	EGDKBMJK_202.region001	RiPP	thiopeptide	121.144	1508.49	3.17854	Bacteria	Planctomycetota	UBA1135	UBA1135	GCA-002686595	GCA-2862085
M39	Aegir_M39_B126	NGIDNPEH_13.region001	RiPP	thiopeptide	189.858	2364.12	3.37367	Bacteria	Desulfobacterota	DSM-4660	Desulfatiglandales	Desulfatiglandaceae	JAGGTJ01
M33	Barite_M33_B89	EMEEGMFL_399.region001	Polyketide	transAT-PKS-like	362.295	3714.85	3.56994	Bacteria	Pseudomonadota	Gammaproteobacteria	Enterobacterales	Alteromonadaceae	JABSOG01
M33	Barite_M33_B89	EMEEGMFL_487.region001	Polyketide	transAT-PKS-like	546.086	5599.38	3.74814	Bacteria	Pseudomonadota	Gammaproteobacteria	Enterobacterales	Alteromonadaceae	JABSOG01
M33	Barite_M33_B89	EMEEGMFL_726.region001	Polyketide	transAT-PKS-like	354.762	3637.61	3.56082	Bacteria	Pseudomonadota	Gammaproteobacteria	Enterobacterales	Alteromonadaceae	JABSOG01
M33	Barite_M33_B97	FAPGKHBG_224.region001	Polyketide	transAT-PKS-like	2080.8	21335.8	4.32911	Bacteria	Pseudomonadota	Gammaproteobacteria	Xanthomonadales	Marinicellaceae	NORP309
