# Supplementary material for: Remarkable biosynthetic capacity of Arctic hydrothermal biofilms
Source: Research Square preprint supplement (doi:10.21203/rs.3.rs-7619139/v1), 2025-09-29
Supplement: Supplementary file 3 [file 602414b2e926a25abf675fcb.xlsx]

## Sheet: Metagenome-stats
Supplementary Table 1. DNA sequencing and metagenome statistics of bioilms from the Arctic Mid-Ocean Ridges. Metagenome IDs corresponds to samples in main Table 1.
Sequencing technology	Metagenome ID	Raw Reads	Filtered reads	#contigs	N50	Longest contig (bp)
Novaseq S4 150 bp paired-end	M24	248.1 M	241.9 M	112272	15964	443605
Novaseq S4 150 bp paired-end	M25	591.5 M	577.1 M	141074	18718	652204
Novaseq S4 150 bp paired-end	M26	212.8 M	200.7 M	25510	3734	711439
Novaseq S4 150 bp paired-end	M33	423.6 M	411.2 M	170646	31600	423652
Novaseq S4 150 bp paired-end	M36	217.2 M	215.3 M	40651	5005	404702
Novaseq S4 150 bp paired-end	M37	285.5 M	278.6 M	123315	26972	339896
Novaseq S4 150 bp paired-end	M38	397.6 M	393.1 M	104919	17125	524619
Novaseq S4 150 bp paired-end	M39	324.5 M	321.6 M	149657	20166	705333
Novaseq S4 150 bp paired-end	M42	517.8 M	513.2 M	72558	8814	729171
* fastp v.0.23.2
