# Supplementary material for: Remarkable biosynthetic capacity of Arctic hydrothermal biofilms
Source: Research Square preprint supplement (doi:10.21203/rs.3.rs-7619139/v1), 2025-09-29
Supplement: Supplementary file 4 [file 94ca5dc9f4a9c66f9c8315d4.xlsx]

## Sheet: ark1
Supplementary Table 3: Database of non-redundant MAGs (n=1140).
genome_ID	BGC counts	Genomic information																Taxonomic information
		completeness (checkm1)	contamination (checkm1)	completeness (checkm2)	contamination (checkm2)	GC	N50	genome length	relative abundance									GTDB v2.4.0 R220 taxonomy
		(%)	(%)	(%)	(%)			(bp)	M24 (%)	M25 (%)	M26 (%)	M36 (%)	M37 (%)	M38 (%)	M39 (%)	M33 (%)	M42 (%)	Domain	Phylum	Class	Order	Family	Genus	Species	complete annotation
Aegir_M24_B1	0	62.42	0.537	58.98	0.08	0.34	4977	3118400	0.100157	0	0	0	0	0	0	0.0017027	0	Bacteria	Bacteroidota	Bacteroidia	Bacteroidales	JAADGE01	CAMZKQ01		d__Bacteria;p__Bacteroidota;c__Bacteroidia;o__Bacteroidales;f__JAADGE01;g__CAMZKQ01;s__
Aegir_M24_B10	2	96.32	0.268	98.18	1.67	0.37	28657	3015190	0.0577253	0.0322172	0	0.390166	0.00204858	0.00371136	0.180723	0	0	Bacteria	Bacteroidota	Bacteroidia	Flavobacteriales	Salibacteraceae	CAJXZP01		d__Bacteria;p__Bacteroidota;c__Bacteroidia;o__Flavobacteriales;f__Salibacteraceae;g__CAJXZP01;s__
Aegir_M24_B100	2	63.41	1.76	69.05	1.55	0.405	10596	1898176	0.0649802	0	0	0	0	0.00248877	0	0.0103845	0	Bacteria	Pseudomonadota	Gammaproteobacteria	SZUA-229	SZUA-229	GCA-2746365		d__Bacteria;p__Pseudomonadota;c__Gammaproteobacteria;o__SZUA-229;f__SZUA-229;g__GCA-2746365;s__
Aegir_M24_B101	1	100	8.62	98.99	2.3	0.339	42966	3133194	0.492845	0.00205415	0	0	0.008071	0.0359859	0.0253555	0.00217354	0	Bacteria	Bacteroidota	Bacteroidia	Flavobacteriales	Crocinitomicaceae	UBA4466		d__Bacteria;p__Bacteroidota;c__Bacteroidia;o__Flavobacteriales;f__Crocinitomicaceae;g__UBA4466;s__
Aegir_M24_B102	3	99.11	0.95	100	0.07	0.509	91334	3089568	0.0928514	0.58991	0.00368471	0.00859506	0	0	0.0717403	0	0.00207339	Bacteria	Pseudomonadota	Gammaproteobacteria	GCA-001735895	GCA-001735895	JACNJF01		d__Bacteria;p__Pseudomonadota;c__Gammaproteobacteria;o__GCA-001735895;f__GCA-001735895;g__JACNJF01;s__
Aegir_M24_B103	8	94.62	0	93.67	1.16	0.496	21116	3133085	0.149567	0	0	0	0	0	0	0.000796057	0	Bacteria	Planctomycetota	UBA11346	UBA11346	UBA11346	JANQLF01		d__Bacteria;p__Planctomycetota;c__UBA11346;o__UBA11346;f__UBA11346;g__JANQLF01;s__
Aegir_M24_B104	0	66.1	1.081	67.02	2.24	0.394	8921	2286643	0.314492	0.00167695	0	0	0	0.023022	0.00784069	0	0	Bacteria	Pseudomonadota	Gammaproteobacteria	Enterobacterales	Kangiellaceae	GCA-002733465		d__Bacteria;p__Pseudomonadota;c__Gammaproteobacteria;o__Enterobacterales;f__Kangiellaceae;g__GCA-002733465;s__
Aegir_M24_B105	3	96	0.88	98.7	0.11	0.42	100261	2474940	0.232953	0	0	0	0	0	0	0	0	Bacteria	Pseudomonadota	Gammaproteobacteria	AKS1	AKS1	Sulfuriflexus		d__Bacteria;p__Pseudomonadota;c__Gammaproteobacteria;o__AKS1;f__AKS1;g__Sulfuriflexus;s__
Aegir_M24_B106	2	93.01	2.185	95.85	3	0.373	20172	2780188	0.38911	0.00165758	0	0.00654954	0	0.0022792	0.00828278	0.0146075	0	Bacteria	Pseudomonadota	Gammaproteobacteria	Xanthomonadales	Marinicellaceae	NORP309		d__Bacteria;p__Pseudomonadota;c__Gammaproteobacteria;o__Xanthomonadales;f__Marinicellaceae;g__NORP309;s__
Aegir_M24_B107	2	68.14	2.937	60.51	3.64	0.368	8548	1055873	0.519552	0.0102582	0	0.193686	0.0569296	0.00357487	0.0172253	0.0907516	0	Bacteria	Campylobacterota	Campylobacteria	Campylobacterales	Sulfurovaceae	Sulfurovum	Sulfurovum sp030949725	d__Bacteria;p__Campylobacterota;c__Campylobacteria;o__Campylobacterales;f__Sulfurovaceae;g__Sulfurovum;s__Sulfurovum sp030949725
Aegir_M24_B108	3	89.57	4.558	88.17	2.05	0.367	29526	3380504	0.284672	0	0	0	0	0.0045466	0	0.0262605	0	Bacteria	Pseudomonadota	Gammaproteobacteria	Enterobacterales	Kangiellaceae	GCA-002733465		d__Bacteria;p__Pseudomonadota;c__Gammaproteobacteria;o__Enterobacterales;f__Kangiellaceae;g__GCA-002733465;s__
Aegir_M24_B109	3	94.77	5.727	90.35	8.13	0.562	22217	2927685	0.0979729	0	0	0	0	0.010526	0	0.0065987	0	Bacteria	Pseudomonadota	Alphaproteobacteria	Rhodobacterales	Rhodobacteraceae	UBA5972		d__Bacteria;p__Pseudomonadota;c__Alphaproteobacteria;o__Rhodobacterales;f__Rhodobacteraceae;g__UBA5972;s__
Aegir_M24_B11	8	94.96	3.345	95.88	0.2	0.437	11916	2711138	0.0456097	0	0	0	0	0	0.0267964	0	0	Bacteria	Pseudomonadota	Gammaproteobacteria	CAJXQU01	CAJXQU01	CAJXQU01	CAJXQU01 sp026984275	d__Bacteria;p__Pseudomonadota;c__Gammaproteobacteria;o__CAJXQU01;f__CAJXQU01;g__CAJXQU01;s__CAJXQU01 sp026984275
Aegir_M24_B110	5	93.87	4.7	100	2.62	0.538	27455	7133337	0.134368	0.000577665	0	0	0	0.0038052	0.0367498	0.00961528	0	Bacteria	Myxococcota	Polyangia	Haliangiales	Haliangiaceae	NORP324		d__Bacteria;p__Myxococcota;c__Polyangia;o__Haliangiales;f__Haliangiaceae;g__NORP324;s__
Aegir_M24_B111	2	93.3	2.464	94.84	1.5	0.482	16279	2565315	0.830218	0.00775959	0.00124466	0	0	0.0408355	0.00525366	0.0060173	0	Bacteria	Pseudomonadota	Gammaproteobacteria	SZUA-229	SZUA-229	GCA-2746365		d__Bacteria;p__Pseudomonadota;c__Gammaproteobacteria;o__SZUA-229;f__SZUA-229;g__GCA-2746365;s__
Aegir_M24_B112	5	88.99	0.635	84.72	1.64	0.623	5409	3658229	0.0377082	0.0105474	0	0.00245988	0	0	0.0187799	0	0.0119022	Bacteria	Planctomycetota	GCA-002687715	GCA-002687715	DRQF01	DRQF01		d__Bacteria;p__Planctomycetota;c__GCA-002687715;o__GCA-002687715;f__DRQF01;g__DRQF01;s__
Aegir_M24_B113	2	86.86	0.512	84.07	0.05	0.286	23574	2264533	0.108278	0.00813472	0	1.06315	0.0524959	0.00950876	0.202979	0.00333532	0	Bacteria	Bacteroidota	Bacteroidia	Flavobacteriales	Flavobacteriaceae	S010-17		d__Bacteria;p__Bacteroidota;c__Bacteroidia;o__Flavobacteriales;f__Flavobacteriaceae;g__S010-17;s__
Aegir_M24_B114	2	92.38	0.031	95.06	0.25	0.485	47454	2959627	0.148901	0.000659136	0	0	0.0215606	0.00130926	0.0119356	0.00431328	0	Bacteria	Pseudomonadota	Alphaproteobacteria	Rhizobiales	Devosiaceae	DROE01		d__Bacteria;p__Pseudomonadota;c__Alphaproteobacteria;o__Rhizobiales;f__Devosiaceae;g__DROE01;s__
Aegir_M24_B115	2	73.69	1.626	77.76	1.16	0.582	7491	2452996	0.110265	0.0399327	0	0.39174	0.00155705	0.00450877	0.162788	0	0	Bacteria	Pseudomonadota	Alphaproteobacteria	Rhodobacterales	Rhodobacteraceae	Profundibacter	Profundibacter amoris	d__Bacteria;p__Pseudomonadota;c__Alphaproteobacteria;o__Rhodobacterales;f__Rhodobacteraceae;g__Profundibacter;s__Profundibacter amoris
Aegir_M24_B116	2	94	1.844	87.89	0.4	0.359	12139	1984103	0.0800465	0.00104095	0	0	0	0.0284515	0	0	0	Bacteria	Campylobacterota	Campylobacteria	Campylobacterales	Sulfurimonadaceae	Sulfurimonas		d__Bacteria;p__Campylobacterota;c__Campylobacteria;o__Campylobacterales;f__Sulfurimonadaceae;g__Sulfurimonas;s__
Aegir_M24_B117	1	85.16	1.77	97.44	0.22	0.647	7230	2454174	0.039435	0.0308727	0	0	0	0	0.0154607	0	0.0625105	Bacteria	Pseudomonadota	Alphaproteobacteria	Rhodobacterales	Rhodobacteraceae	JAAEUB01		d__Bacteria;p__Pseudomonadota;c__Alphaproteobacteria;o__Rhodobacterales;f__Rhodobacteraceae;g__JAAEUB01;s__
Aegir_M24_B118	7	92.84	2.15	90.41	1.52	0.407	8119	3131400	0.0693318	0	0	0	0	0	0	0.00643828	0	Bacteria	Bacteroidota	Bacteroidia	UBA10329	UBA10329	UBA10329		d__Bacteria;p__Bacteroidota;c__Bacteroidia;o__UBA10329;f__UBA10329;g__UBA10329;s__
Aegir_M24_B119	1	91.94	1.136	91.21	4.68	0.532	12705	3138140	0.200891	0.00174894	0	0	0.0238114	0.0014965	0.0131047	0.0432238	0	Bacteria	Planctomycetota	Phycisphaerae	Phycisphaerales	UBA1924	UBA1924		d__Bacteria;p__Planctomycetota;c__Phycisphaerae;o__Phycisphaerales;f__UBA1924;g__UBA1924;s__
Aegir_M24_B12	5	74.65	3.448	93.64	3.48	0.479	10353	2736067	0.0638591	0	0	0	0	0.00277468	0	0	0	Bacteria	Pseudomonadota	Gammaproteobacteria	SZUA-229	SZUA-229	GCA-2746365		d__Bacteria;p__Pseudomonadota;c__Gammaproteobacteria;o__SZUA-229;f__SZUA-229;g__GCA-2746365;s__
Aegir_M24_B120	0	99	0	100	0	0.478	175548	2726446	0.0693849	0.00851905	0	0.0129298	0	0.000766698	0.112291	0	0	Bacteria	Bacteroidota	Bacteroidia	Chitinophagales	Saprospiraceae	JALSTN01		d__Bacteria;p__Bacteroidota;c__Bacteroidia;o__Chitinophagales;f__Saprospiraceae;g__JALSTN01;s__
Aegir_M24_B121	0	52.53	0.854	90.83	0.97	0.423	68052	766146	0.17206	0	0	0	0.00303234	0.00248468	0.00709583	0	0	Bacteria	Patescibacteria	Paceibacteria	UBA9973	UBA918	OLB19		d__Bacteria;p__Patescibacteria;c__Paceibacteria;o__UBA9973;f__UBA918;g__OLB19;s__
Aegir_M24_B122	3	91.52	3.448	93.81	1.05	0.396	12785	2590745	0.382301	0.137412	0	2.39427	0.153932	0.010462	1.32806	0	0	Bacteria	Pseudomonadota	Gammaproteobacteria	Methylococcales	Methylomonadaceae	Methyloprofundus	Methyloprofundus sp900128525	d__Bacteria;p__Pseudomonadota;c__Gammaproteobacteria;o__Methylococcales;f__Methylomonadaceae;g__Methyloprofundus;s__Methyloprofundus sp900128525
Aegir_M24_B123	3	96.47	1.37	98.29	0.14	0.695	46078	2674334	0.140773	0.00637674	0	0	0	0	0	0	0.0083378	Bacteria	Pseudomonadota	Gammaproteobacteria	UBA6429	UBA6429	JALUTW01	JALUTW01 sp027021685	d__Bacteria;p__Pseudomonadota;c__Gammaproteobacteria;o__UBA6429;f__UBA6429;g__JALUTW01;s__JALUTW01 sp027021685
Aegir_M24_B124	6	97.84	1.612	90.55	2.47	0.648	66422	4911874	0.0903357	0	0	0.00510039	0	0	0.0420112	0	0	Bacteria	Planctomycetota	UBA1135	UBA1135	GCA-002686595			d__Bacteria;p__Planctomycetota;c__UBA1135;o__UBA1135;f__GCA-002686595;g__;s__
Aegir_M24_B125	4	89.77	8.057	85.55	3.75	0.516	8408	5217844	0.0636449	0	0	0	0	0.00120042	0.00981272	0	0	Bacteria	Planctomycetota	GCA-002687715	GCA-002687715	DRQF01	S139-23		d__Bacteria;p__Planctomycetota;c__GCA-002687715;o__GCA-002687715;f__DRQF01;g__S139-23;s__
Aegir_M24_B126	4	96.3	1.676	92.98	0.16	0.613	96417	3000688	0.281688	0.0016567	0	0	0	0.000876639	0.0619543	0	0.00736312	Bacteria	Pseudomonadota	Alphaproteobacteria	Rhodobacterales	Rhodobacteraceae	JAJRUE01		d__Bacteria;p__Pseudomonadota;c__Alphaproteobacteria;o__Rhodobacterales;f__Rhodobacteraceae;g__JAJRUE01;s__
Aegir_M24_B127	21	69.82	0	68.32	3.38	0.403	4230	3761368	0.0711858	0	0	0	0	0.00582071	0.00371726	0.00901607	0	Bacteria	Planctomycetota	GCA-2746535	GCA-2746535	GCA-2746535	GCA-2746535		d__Bacteria;p__Planctomycetota;c__GCA-2746535;o__GCA-2746535;f__GCA-2746535;g__GCA-2746535;s__
Aegir_M24_B128	2	92.59	3.07	95.33	0.13	0.417	44740	4100602	0.11053	0	0	0	0	0	0	0	0	Bacteria	Pseudomonadota	Gammaproteobacteria	Pseudomonadales	Azotimanducaceae_A	JAHRVQ01		d__Bacteria;p__Pseudomonadota;c__Gammaproteobacteria;o__Pseudomonadales;f__Azotimanducaceae_A;g__JAHRVQ01;s__
Aegir_M24_B129	2	66.82	1.451	65.97	0.07	0.323	9903	2151439	0.225882	0.00201057	0	0.0294484	0.0363266	0.00966669	0.0147031	0.0312559	0	Bacteria	Bacteroidota	Bacteroidia	Flavobacteriales	Vicingaceae	GCA-002793235		d__Bacteria;p__Bacteroidota;c__Bacteroidia;o__Flavobacteriales;f__Vicingaceae;g__GCA-002793235;s__
Aegir_M24_B13	3	93.02	1.134	99.9	1.33	0.406	28611	2590364	1.2208	0.00123061	0	0	0	0	0	0.0354694	0	Bacteria	Pseudomonadota	Gammaproteobacteria	Beggiatoales	Beggiatoaceae			d__Bacteria;p__Pseudomonadota;c__Gammaproteobacteria;o__Beggiatoales;f__Beggiatoaceae;g__;s__
Aegir_M24_B130	7	98.52	1.034	99.7	0.16	0.407	39321	3465014	0.0824444	0.023288	0	0	0	0	0.111722	0	0	Bacteria	Pseudomonadota	Gammaproteobacteria	Methylococcales	Methylomonadaceae	JALSJK01	JALSJK01 sp026989395	d__Bacteria;p__Pseudomonadota;c__Gammaproteobacteria;o__Methylococcales;f__Methylomonadaceae;g__JALSJK01;s__JALSJK01 sp026989395
Aegir_M24_B131	3	87.55	6.653	93.96	6.24	0.423	11842	1798328	0.157264	0.0132387	0	0.105817	0.0511194	0.0116987	0.0567492	0.0336291	0	Bacteria	Pseudomonadota	Gammaproteobacteria	Nitrosococcales	Methylophagaceae	GCA-002733105		d__Bacteria;p__Pseudomonadota;c__Gammaproteobacteria;o__Nitrosococcales;f__Methylophagaceae;g__GCA-002733105;s__
Aegir_M24_B132	2	97.84	1.075	89.13	0.99	0.649	53448	4723567	0.105811	0.000643809	0	0.00855314	0.00299553	0.00253066	0.0519734	0	0	Bacteria	Planctomycetota	UBA1135	UBA1135	GCA-002686595	JARGPD01		d__Bacteria;p__Planctomycetota;c__UBA1135;o__UBA1135;f__GCA-002686595;g__JARGPD01;s__
Aegir_M24_B133	0	51.3	2.751	49.03	1.3	0.365	3755	1264990	0.0605109	0	0	0	0	0.0136249	0	0	0	Bacteria	Planctomycetota	JADGBV01	JADGBV01	JADGBV01	JADGBV01		d__Bacteria;p__Planctomycetota;c__JADGBV01;o__JADGBV01;f__JADGBV01;g__JADGBV01;s__
Aegir_M24_B14	2	92.58	3.086	97.96	0.02	0.485	88949	4127531	0.203883	0	0	0	0	0	0.00126948	0	0	Bacteria	Pseudomonadota	Gammaproteobacteria	Pseudomonadales	Azotimanducaceae_A	GCA-002726655		d__Bacteria;p__Pseudomonadota;c__Gammaproteobacteria;o__Pseudomonadales;f__Azotimanducaceae_A;g__GCA-002726655;s__
Aegir_M24_B15	3	94.62	1.612	87.95	1.09	0.654	33580	5448468	0.109988	0	0	0	0	0	0.0538977	0	0	Bacteria	Planctomycetota	UBA1135	UBA1135	GCA-002686595	GCA-2862085		d__Bacteria;p__Planctomycetota;c__UBA1135;o__UBA1135;f__GCA-002686595;g__GCA-2862085;s__
Aegir_M24_B16	1	52.63	0	56.67	0.88	0.468	3583	3169086	0.0508122	0.0044231	0	0.00574751	0	0	0.0245333	0	0.000791774	Bacteria	Planctomycetota	Planctomycetia	Planctomycetales	Planctomycetaceae	Rubinisphaera		d__Bacteria;p__Planctomycetota;c__Planctomycetia;o__Planctomycetales;f__Planctomycetaceae;g__Rubinisphaera;s__
Aegir_M24_B17	1	63.79	6.034	79.21	2.6	0.378	17664	2847261	0.106605	0	0	0	0	0.00222867	0	0	0	Bacteria	Pseudomonadota	Gammaproteobacteria	Enterobacterales	Alteromonadaceae			d__Bacteria;p__Pseudomonadota;c__Gammaproteobacteria;o__Enterobacterales;f__Alteromonadaceae;g__;s__
Aegir_M24_B18	3	88.76	1.743	91.92	1.01	0.575	11735	2206797	0.06775	0	0	0	0	0.00160962	0	0	0.00214144	Bacteria	Pseudomonadota	Gammaproteobacteria	DSM-19610	DSM-19610	Thiogranum		d__Bacteria;p__Pseudomonadota;c__Gammaproteobacteria;o__DSM-19610;f__DSM-19610;g__Thiogranum;s__
Aegir_M24_B19	4	64.91	0	77.42	3.04	0.326	8068	2599158	0.0970067	0	0	0	0	0	0.00424992	0.00325632	0	Bacteria	Bdellovibrionota	Bacteriovoracia	Bacteriovoracales	Bacteriovoracaceae			d__Bacteria;p__Bdellovibrionota;c__Bacteriovoracia;o__Bacteriovoracales;f__Bacteriovoracaceae;g__;s__
Aegir_M24_B2	9	91.77	2.281	97.1	3.21	0.616	12331	7289817	0.0718403	0.000603287	0	0	0.0179972	0	0.0198151	0.00199243	0	Bacteria	Myxococcota	Polyangia	Polyangiales	SG8-38			d__Bacteria;p__Myxococcota;c__Polyangia;o__Polyangiales;f__SG8-38;g__;s__
Aegir_M24_B20	4	82.33	0.859	79.73	0.14	0.355	6141	2088686	0.0415097	0.00181392	0	0.0136414	0.012778	0.0211985	0.00186304	0.00230073	0	Bacteria	Bacteroidota	Bacteroidia	Flavobacteriales	Crocinitomicaceae	UBA4466		d__Bacteria;p__Bacteroidota;c__Bacteroidia;o__Flavobacteriales;f__Crocinitomicaceae;g__UBA4466;s__
Aegir_M24_B21	6	99.59	2.208	100	0.97	0.492	83559	3740546	0.110223	0.00149027	0	0	0.00535975	0	0.0218916	0.00495091	0	Bacteria	Pseudomonadota	Alphaproteobacteria	Rhizobiales	Rhizobiaceae	SZUA-100		d__Bacteria;p__Pseudomonadota;c__Alphaproteobacteria;o__Rhizobiales;f__Rhizobiaceae;g__SZUA-100;s__
Aegir_M24_B22	5	74.12	3.248	73.09	2.78	0.54	5205	6450929	0.0526885	0	0	0	0	0	0	0.00137852	0	Bacteria	Myxococcota	Polyangia	Haliangiales	Haliangiaceae	NORP324		d__Bacteria;p__Myxococcota;c__Polyangia;o__Haliangiales;f__Haliangiaceae;g__NORP324;s__
Aegir_M24_B23	2	59.96	0.531	57.13	0.81	0.541	20139	2351757	0.0764602	0	0	0	0	0.00282462	0.0173502	0.0151447	0	Bacteria	Pseudomonadota	Alphaproteobacteria	Rhodobacterales	Rhodobacteraceae	Amylibacter	Amylibacter sp024280735	d__Bacteria;p__Pseudomonadota;c__Alphaproteobacteria;o__Rhodobacterales;f__Rhodobacteraceae;g__Amylibacter;s__Amylibacter sp024280735
Aegir_M24_B24	3	99.22	1.261	100	1.4	0.567	116578	2921876	0.22038	0	0	0	0	0	0	0	0.00749509	Bacteria	Pseudomonadota	Gammaproteobacteria	SZUA-152	SZUA-152	SZUA-152		d__Bacteria;p__Pseudomonadota;c__Gammaproteobacteria;o__SZUA-152;f__SZUA-152;g__SZUA-152;s__
Aegir_M24_B25	4	91.39	1.408	83.85	0.93	0.496	34315	2493990	0.780956	0.0007046	0	0	0	0	0	0	0	Bacteria	Pseudomonadota	Gammaproteobacteria	SZUA-152	SZUA-152	SZUA-152		d__Bacteria;p__Pseudomonadota;c__Gammaproteobacteria;o__SZUA-152;f__SZUA-152;g__SZUA-152;s__
Aegir_M24_B26	2	93.78	1.14	92.82	0.33	0.331	31393	2609683	0.118669	0.0125019	0	0.0338531	0.0354318	0.0300559	0.271563	0.0631159	0	Bacteria	Bacteroidota	Bacteroidia	Flavobacteriales	Flavobacteriaceae	GCA-002733185		d__Bacteria;p__Bacteroidota;c__Bacteroidia;o__Flavobacteriales;f__Flavobacteriaceae;g__GCA-002733185;s__
Aegir_M24_B27	3	89.85	4.967	88.55	3.8	0.329	11394	3578225	0.47359	0	0	0	0	0	0	0.0479743	0	Bacteria	Bacteroidota	Bacteroidia	Cytophagales	Bernardetiaceae			d__Bacteria;p__Bacteroidota;c__Bacteroidia;o__Cytophagales;f__Bernardetiaceae;g__;s__
Aegir_M24_B28	7	98.44	0.316	98.14	0.19	0.483	20841	2353179	0.144176	0.546339	0.193039	0.0122123	0	0	0.269232	0	0.00506397	Bacteria	Pseudomonadota	Gammaproteobacteria	Methylococcales	Methylomonadaceae	Methylomarinum		d__Bacteria;p__Pseudomonadota;c__Gammaproteobacteria;o__Methylococcales;f__Methylomonadaceae;g__Methylomarinum;s__
Aegir_M24_B29	3	98.91	0.54	95.39	0.11	0.406	43737	3378252	0.123525	0.017453	0	0.00180047	0	0.00448842	0.498834	0	0.00136501	Bacteria	Pseudomonadota	Gammaproteobacteria	Enterobacterales	GCA-002770795	DRNA01		d__Bacteria;p__Pseudomonadota;c__Gammaproteobacteria;o__Enterobacterales;f__GCA-002770795;g__DRNA01;s__
Aegir_M24_B3	6	85.38	2.795	92.57	4.61	0.633	7095	5093613	0.0571952	0	0	0	0	0	0.00124488	0.00505674	0	Bacteria	Myxococcota	UBA9042	PHBI01	CALCNF01			d__Bacteria;p__Myxococcota;c__UBA9042;o__PHBI01;f__CALCNF01;g__;s__
Aegir_M24_B30	0	50.14	7.758	59.6	13.59	0.316	4228	2464527	0.0603033	0	0	0.00670452	0.00499751	0.0268836	0.00753957	0.00373016	0	Bacteria	Bacteroidota	Bacteroidia	Flavobacteriales	Crocinitomicaceae	Putridiphycobacter		d__Bacteria;p__Bacteroidota;c__Bacteroidia;o__Flavobacteriales;f__Crocinitomicaceae;g__Putridiphycobacter;s__
Aegir_M24_B31	6	69.82	8.62	74.73	9.66	0.367	9247	4076856	0.163629	0	0	0	0	0.0048185	0	0.0457823	0	Bacteria	Pseudomonadota	Gammaproteobacteria	Enterobacterales	Kangiellaceae	GCA-002733465		d__Bacteria;p__Pseudomonadota;c__Gammaproteobacteria;o__Enterobacterales;f__Kangiellaceae;g__GCA-002733465;s__
Aegir_M24_B32	3	95.45	2.909	95.55	3.75	0.546	12930	5784681	0.056986	0.228816	0	0.0314424	0	0.000770645	0.0709324	0	0	Bacteria	Chloroflexota	Anaerolineae	Promineifilales	Promineifilaceae	JAJRTP01		d__Bacteria;p__Chloroflexota;c__Anaerolineae;o__Promineifilales;f__Promineifilaceae;g__JAJRTP01;s__
Aegir_M24_B33	0	95.13	0.148	96.84	0.58	0.363	63081	3384787	0.100663	0	0	0	0	0	0.0331667	0	0	Bacteria	Bacteroidota	Bacteroidia	Cytophagales	Cyclobacteriaceae	JAKISE01		d__Bacteria;p__Bacteroidota;c__Bacteroidia;o__Cytophagales;f__Cyclobacteriaceae;g__JAKISE01;s__
Aegir_M24_B34	1	95.73	0.236	96.31	0.72	0.545	174397	2961308	0.210744	0	0	0.0027093	0.00924016	0	0.0113458	0	0	Bacteria	Pseudomonadota	Alphaproteobacteria	Rhizobiales	Devosiaceae	DROE01		d__Bacteria;p__Pseudomonadota;c__Alphaproteobacteria;o__Rhizobiales;f__Devosiaceae;g__DROE01;s__
Aegir_M24_B35	2	98.01	1.893	98.83	1.29	0.546	69677	3175757	0.116362	0.0584228	0	0.00691259	0	0	0.0284707	0.00424193	0.0312452	Bacteria	Pseudomonadota	Gammaproteobacteria	UWMA-0217	UWMA-0217	JALSHZ01		d__Bacteria;p__Pseudomonadota;c__Gammaproteobacteria;o__UWMA-0217;f__UWMA-0217;g__JALSHZ01;s__
Aegir_M24_B36	7	96.77	0	90.51	0.31	0.464	21809	4482643	0.161385	0	0	0	0.00261991	0	0.00741685	0.00495982	0	Bacteria	Planctomycetota	UBA11346	UBA11346	UBA11346	JANQLF01		d__Bacteria;p__Planctomycetota;c__UBA11346;o__UBA11346;f__UBA11346;g__JANQLF01;s__
Aegir_M24_B37	2	98.51	1.732	100	0.12	0.531	73735	4240145	0.0641746	0.0183789	0	0	0	0	0	0	0.0580492	Bacteria	Bacteroidota	Bacteroidia	Chitinophagales	Saprospiraceae	UBA6168		d__Bacteria;p__Bacteroidota;c__Bacteroidia;o__Chitinophagales;f__Saprospiraceae;g__UBA6168;s__
Aegir_M24_B38	5	51.62	0.066	50.74	0.78	0.595	3712	4867251	0.0495823	0	0	0	0.0145739	0	0.016937	0	0	Bacteria	Planctomycetota	UBA1135	UBA2386	UBA2386			d__Bacteria;p__Planctomycetota;c__UBA1135;o__UBA2386;f__UBA2386;g__;s__
Aegir_M24_B39	8	64.22	8.226	63.13	9.52	0.443	3673	4626702	0.0562533	0.0122063	0	0.0181837	0.00851778	0.00472692	0.0724026	0.00915594	0	Bacteria	Verrucomicrobiota	Kiritimatiellia	UBA8416				d__Bacteria;p__Verrucomicrobiota;c__Kiritimatiellia;o__UBA8416;f__;g__;s__
Aegir_M24_B4	2	92.59	1.434	94.22	1.38	0.377	13090	1584057	0.188995	0.000686823	0	0	0	0.0144569	0	0.0474395	0	Bacteria	Campylobacterota	Campylobacteria	Campylobacterales	Sulfurovaceae	Sulfurovum	Sulfurovum sp030949325	d__Bacteria;p__Campylobacterota;c__Campylobacteria;o__Campylobacterales;f__Sulfurovaceae;g__Sulfurovum;s__Sulfurovum sp030949325
Aegir_M24_B40	1	62.56	0.546	69.41	0.52	0.326	5992	2144011	0.110548	0	0	0	0	0	0	0.0146382	0	Bacteria	Bacteroidota	Bacteroidia	Cytophagales	JAHDFW01	JAHDFW01		d__Bacteria;p__Bacteroidota;c__Bacteroidia;o__Cytophagales;f__JAHDFW01;g__JAHDFW01;s__
Aegir_M24_B41	1	61.22	2.304	69.81	3.49	0.301	5003	1299112	0.0351724	0.0798799	0.0102118	0.0128481	0	0.00207693	0.119835	0	0.00426205	Bacteria	Bacteroidota	Bacteroidia	Flavobacteriales	Flavobacteriaceae	S010-17		d__Bacteria;p__Bacteroidota;c__Bacteroidia;o__Flavobacteriales;f__Flavobacteriaceae;g__S010-17;s__
Aegir_M24_B42	6	99.1	0.8	99.16	0	0.695	113825	4081561	0.160016	0.00463319	0	0.00307596	0.00202561	0	0.286957	0	0	Bacteria	Pseudomonadota	Alphaproteobacteria	Rhodobacterales	Rhodobacteraceae	Oceanicella		d__Bacteria;p__Pseudomonadota;c__Alphaproteobacteria;o__Rhodobacterales;f__Rhodobacteraceae;g__Oceanicella;s__
Aegir_M24_B43	2	86.45	1.36	86.55	1.22	0.735	5689	2213846	0.0533793	0.0309416	0	0	0	0	0	0	0.00536603	Bacteria	Pseudomonadota	Gammaproteobacteria	S144-34	S144-34	S144-34	S144-34 sp026989495	d__Bacteria;p__Pseudomonadota;c__Gammaproteobacteria;o__S144-34;f__S144-34;g__S144-34;s__S144-34 sp026989495
Aegir_M24_B44	6	91.2	1.321	96.13	0	0.393	49235	2740225	0.29601	0.00404365	0	0	0	0	0.0920158	0	0	Bacteria	Pseudomonadota	Gammaproteobacteria	Methylococcales	Methylomonadaceae	QPIN01		d__Bacteria;p__Pseudomonadota;c__Gammaproteobacteria;o__Methylococcales;f__Methylomonadaceae;g__QPIN01;s__
Aegir_M24_B45	11	90	3.225	95.15	0.43	0.459	39410	5759409	0.111977	0.000458363	0	0.0027553	0.00371555	0.00216432	0.0280128	0.00180846	0	Bacteria	Myxococcota	Bradymonadia	Bradymonadales	Bradymonadaceae	CALJNB01		d__Bacteria;p__Myxococcota;c__Bradymonadia;o__Bradymonadales;f__Bradymonadaceae;g__CALJNB01;s__
Aegir_M24_B46	1	78.48	0.049	76.79	0.09	0.337	4914	2233597	0.0641534	0	0	0	0.0026558	0.000877614	0	0.00252943	0	Bacteria	Bacteroidota	Kapaibacteriia	Kapaibacteriales	UBA2268			d__Bacteria;p__Bacteroidota;c__Kapaibacteriia;o__Kapaibacteriales;f__UBA2268;g__;s__
Aegir_M24_B47	0	61.68	0.99	90.22	0.76	0.415	27579	858529	0.236207	0	0	0.00271491	0.00260711	0	0.012082	0.00187156	0	Bacteria	Patescibacteria	Paceibacteria	UBA9973	UBA918	OLB19		d__Bacteria;p__Patescibacteria;c__Paceibacteria;o__UBA9973;f__UBA918;g__OLB19;s__
Aegir_M24_B48	0	67.73	0.246	75.2	0.05	0.494	4736	1953561	0.0488951	0.00875425	0	0	0	0	0	0	0	Bacteria	Bacteroidota	Bacteroidia	Chitinophagales	S012-47	S012-47		d__Bacteria;p__Bacteroidota;c__Bacteroidia;o__Chitinophagales;f__S012-47;g__S012-47;s__
Aegir_M24_B49	5	75.66	0.938	77.86	1.04	0.515	8412	2455597	0.0754508	0.00121093	0	0	0	0.00128668	0	0	0	Bacteria	Pseudomonadota	Gammaproteobacteria	SZUA-152	SZUA-152	SZUA-152		d__Bacteria;p__Pseudomonadota;c__Gammaproteobacteria;o__SZUA-152;f__SZUA-152;g__SZUA-152;s__
Aegir_M24_B5	8	95.28	2.528	99.89	0	0.409	34445	3628543	0.612074	0.0116196	0	0	0.212179	0.00654264	0.115634	0.0165489	0	Bacteria	Pseudomonadota	Gammaproteobacteria	Methylococcales	Methylomonadaceae	QPIN01		d__Bacteria;p__Pseudomonadota;c__Gammaproteobacteria;o__Methylococcales;f__Methylomonadaceae;g__QPIN01;s__
Aegir_M24_B50	2	50.86	2.586	57.97	2.85	0.375	4199	1901814	0.0628161	0	0	0	0	0.00365359	0	0.0909927	0	Bacteria	Pseudomonadota	Gammaproteobacteria	GCA-001735895	GCA-001735895			d__Bacteria;p__Pseudomonadota;c__Gammaproteobacteria;o__GCA-001735895;f__GCA-001735895;g__;s__
Aegir_M24_B51	3	97.02	0	98.05	1.25	0.363	26668	4126456	0.14101	0	0	0	0.00894912	0	0	0.0037525	0	Bacteria	Bacteroidota	Bacteroidia	Cytophagales	Cyclobacteriaceae			d__Bacteria;p__Bacteroidota;c__Bacteroidia;o__Cytophagales;f__Cyclobacteriaceae;g__;s__
Aegir_M24_B52	3	91.36	1.217	92.5	0	0.351	26292	3018033	0.460235	0	0	0	0	0.00458386	0	0.00508624	0	Bacteria	Pseudomonadota	Gammaproteobacteria	Enterobacterales	Alteromonadaceae	Colwellia		d__Bacteria;p__Pseudomonadota;c__Gammaproteobacteria;o__Enterobacterales;f__Alteromonadaceae;g__Colwellia;s__
Aegir_M24_B53	5	100	1.117	100	0.02	0.324	34412	4098423	0.161167	0.00765703	0	0.0136784	0	0.0011648	0.0320856	0	0	Bacteria	Bacteroidota	Ignavibacteria	Ignavibacteriales	Melioribacteraceae	GCA-2746605		d__Bacteria;p__Bacteroidota;c__Ignavibacteria;o__Ignavibacteriales;f__Melioribacteraceae;g__GCA-2746605;s__
Aegir_M24_B54	9	70.68	2.675	82.5	1.27	0.575	4756	5613551	0.0559563	0	0	0	0.00450048	0	0.00291978	0	0	Bacteria	Myxococcota	UBA727	UBA727				d__Bacteria;p__Myxococcota;c__UBA727;o__UBA727;f__;g__;s__
Aegir_M24_B55	3	97.1	1.2	94.46	0.7	0.611	23014	2360871	0.04072	0.0291379	0.00285213	0	0	0	0.013629	0.00194584	0	Bacteria	Pseudomonadota	Alphaproteobacteria	Rhodobacterales	Rhodobacteraceae	UBA3077		d__Bacteria;p__Pseudomonadota;c__Alphaproteobacteria;o__Rhodobacterales;f__Rhodobacteraceae;g__UBA3077;s__
Aegir_M24_B56	1	88.97	3.408	86.64	0.24	0.402	9236	3474099	0.0339791	0	0	0	0	0	0.0423744	0	0	Bacteria	Bacteroidota	Bacteroidia	Cytophagales	Cyclobacteriaceae	S012-113		d__Bacteria;p__Bacteroidota;c__Bacteroidia;o__Cytophagales;f__Cyclobacteriaceae;g__S012-113;s__
Aegir_M24_B57	5	97.27	0.709	91.76	1.42	0.504	12777	4719508	0.0727438	0	0	0	0	0	0	0.00739601	0	Bacteria	Verrucomicrobiota	Verrucomicrobiae	Verrucomicrobiales	DEV007	Arctic95D-9		d__Bacteria;p__Verrucomicrobiota;c__Verrucomicrobiae;o__Verrucomicrobiales;f__DEV007;g__Arctic95D-9;s__
Aegir_M24_B58	6	89.23	0.757	93.03	0.17	0.377	37908	2438968	1.68914	0	0	0.0254317	0	0.168291	0	0	0	Bacteria	Pseudomonadota	Gammaproteobacteria	Methylococcales	Methylomonadaceae	WTBX01	WTBX01 sp030949405	d__Bacteria;p__Pseudomonadota;c__Gammaproteobacteria;o__Methylococcales;f__Methylomonadaceae;g__WTBX01;s__WTBX01 sp030949405
Aegir_M24_B59	4	98.83	1.098	98.9	0.01	0.423	29139	4640453	0.121163	0	0	0.00414258	0	0.0144381	0.007119	0	0	Bacteria	Calditrichota	Calditrichia	Calditrichales	J004	JABFGF01		d__Bacteria;p__Calditrichota;c__Calditrichia;o__Calditrichales;f__J004;g__JABFGF01;s__
Aegir_M24_B6	2	81.03	0	93.05	0.06	0.34	12126	4389162	0.0704584	0	0	0	0	0	0.0295335	0.00448473	0	Bacteria	Bacteroidota	Bacteroidia	Chitinophagales	Saprospiraceae	CAJQQY01		d__Bacteria;p__Bacteroidota;c__Bacteroidia;o__Chitinophagales;f__Saprospiraceae;g__CAJQQY01;s__
Aegir_M24_B60	5	88.67	0.905	86.78	0.39	0.551	31412	2665612	0.0778158	0	0	0	0	0	0.00798234	0.00342196	0	Bacteria	Pseudomonadota	Alphaproteobacteria	Rhodobacterales	Rhodobacteraceae	NVTR01		d__Bacteria;p__Pseudomonadota;c__Alphaproteobacteria;o__Rhodobacterales;f__Rhodobacteraceae;g__NVTR01;s__
Aegir_M24_B61	3	85.42	1.675	81.5	3.61	0.337	9463	3398816	0.171816	0	0	0.146037	0	0	0.00125565	0.00777088	0	Bacteria	Bacteroidota	Bacteroidia	Cytophagales	Bernardetiaceae			d__Bacteria;p__Bacteroidota;c__Bacteroidia;o__Cytophagales;f__Bernardetiaceae;g__;s__
Aegir_M24_B62	8	95.79	2.413	95.84	0.71	0.381	12432	3770928	0.447463	0.0379555	0	0.168865	0.0537395	0.0809042	0.190074	0.0634662	0	Bacteria	Pseudomonadota	Gammaproteobacteria	Methylococcales	Methylomonadaceae	QPIN01	QPIN01 sp026988195	d__Bacteria;p__Pseudomonadota;c__Gammaproteobacteria;o__Methylococcales;f__Methylomonadaceae;g__QPIN01;s__QPIN01 sp026988195
Aegir_M24_B63	3	90.59	2.816	87.59	1.24	0.654	13031	2312607	0.194373	1.39005	0.00178631	0.00308326	0	0	0	0	0	Bacteria	Pseudomonadota	Gammaproteobacteria	UBA6429	UBA6429	JALSSV01		d__Bacteria;p__Pseudomonadota;c__Gammaproteobacteria;o__UBA6429;f__UBA6429;g__JALSSV01;s__
Aegir_M24_B64	2	87.08	1.612	82.64	0.64	0.649	11371	5697251	0.0841132	0.000548265	0	0	0.0211286	0.00928344	0.0143919	0.00165148	0	Bacteria	Planctomycetota	UBA1135	UBA1135	GCA-002686595	JABACD01		d__Bacteria;p__Planctomycetota;c__UBA1135;o__UBA1135;f__GCA-002686595;g__JABACD01;s__
Aegir_M24_B65	1	59.67	0	58.54	0.36	0.605	4061	2028433	0.0483579	0.000700073	0	0	0	0	0.00463348	0	0	Bacteria	Planctomycetota	Phycisphaerae	Phycisphaerales	UBA1924	JAUIES01		d__Bacteria;p__Planctomycetota;c__Phycisphaerae;o__Phycisphaerales;f__UBA1924;g__JAUIES01;s__
Aegir_M24_B66	5	86.15	2.521	93.67	0.84	0.409	25297	5799671	0.196316	0	0	0	0	0	0.036669	0.0044897	0	Bacteria	Bdellovibrionota	Oligoflexia	Oligoflexales				d__Bacteria;p__Bdellovibrionota;c__Oligoflexia;o__Oligoflexales;f__;g__;s__
Aegir_M24_B67	5	89.37	4.068	91.54	0.73	0.64	13733	4037716	0.034595	0.000571049	0	0	0	0	0.0457784	0	0.00535072	Bacteria	Myxococcota_A	UBA9160	UBA9160	UBA4427	UBA4427		d__Bacteria;p__Myxococcota_A;c__UBA9160;o__UBA9160;f__UBA4427;g__UBA4427;s__
Aegir_M24_B68	2	57.55	1.229	50.66	0.01	0.381	13984	931661	1.38336	0.427391	0.00338611	1.06618	0.0157548	0.0319897	0.219635	0.0102313	0	Bacteria	Campylobacterota	Campylobacteria	Campylobacterales	Sulfurovaceae	Sulfurovum		d__Bacteria;p__Campylobacterota;c__Campylobacteria;o__Campylobacterales;f__Sulfurovaceae;g__Sulfurovum;s__
Aegir_M24_B69	0	93.19	1.244	95.72	0.24	0.493	18728	2507114	0.0735074	0.0176379	0	0.00956759	0	0.00154155	0.148736	0.00242913	0	Bacteria	Pseudomonadota	Alphaproteobacteria	Caulobacterales	Maricaulaceae	Robiginitomaculum_A		d__Bacteria;p__Pseudomonadota;c__Alphaproteobacteria;o__Caulobacterales;f__Maricaulaceae;g__Robiginitomaculum_A;s__
Aegir_M24_B7	2	90.81	0.54	91.1	0.75	0.323	35287	4507589	0.610494	0.00118689	0	0	0.0227185	0	0.0416046	0.00390021	0	Bacteria	Bacteroidota	Bacteroidia	Flavobacteriales	Crocinitomicaceae	Crocinitomix		d__Bacteria;p__Bacteroidota;c__Bacteroidia;o__Flavobacteriales;f__Crocinitomicaceae;g__Crocinitomix;s__
Aegir_M24_B70	3	54.27	9.482	52.19	9.19	0.351	5412	1273284	0.153512	0.000891691	0	0	0	0.0246918	0	0.0149811	0	Bacteria	Campylobacterota	Campylobacteria	Campylobacterales	Sulfurimonadaceae	GCA-2733885		d__Bacteria;p__Campylobacterota;c__Campylobacteria;o__Campylobacterales;f__Sulfurimonadaceae;g__GCA-2733885;s__
Aegir_M24_B71	5	86.11	1.767	93.69	1.92	0.49	6983	5003102	0.0602968	0	0	0	0	0	0.0015482	0.0129035	0	Bacteria	Planctomycetota	Planctomycetia	Planctomycetales	Planctomycetaceae	Thalassoglobus		d__Bacteria;p__Planctomycetota;c__Planctomycetia;o__Planctomycetales;f__Planctomycetaceae;g__Thalassoglobus;s__
Aegir_M24_B72	14	99.72	0	98.09	1.58	0.365	39974	5418633	0.101454	0	0	0	0	0.00328829	0.0334751	0.0140817	0	Bacteria	Bacteroidota	Bacteroidia	Flavobacteriales	Crocinitomicaceae	Crocinitomix		d__Bacteria;p__Bacteroidota;c__Bacteroidia;o__Flavobacteriales;f__Crocinitomicaceae;g__Crocinitomix;s__
Aegir_M24_B73	4	94.51	0.689	97.27	0.26	0.408	28227	2830889	0.278902	0.0156936	0	0.0030756	0	0	0.0134062	0	0	Bacteria	Pseudomonadota	Gammaproteobacteria	Thiotrichales	Thiotrichaceae	HyVt-477		d__Bacteria;p__Pseudomonadota;c__Gammaproteobacteria;o__Thiotrichales;f__Thiotrichaceae;g__HyVt-477;s__
Aegir_M24_B74	0	66.94	5.532	66.39	7.21	0.344	4449	1415396	0.0778531	0.013344	0	0.691986	0.0445885	0.00315011	0.0133347	0.136588	0	Bacteria	Campylobacterota	Campylobacteria	Campylobacterales	Sulfurovaceae	UBA1140		d__Bacteria;p__Campylobacterota;c__Campylobacteria;o__Campylobacterales;f__Sulfurovaceae;g__UBA1140;s__
Aegir_M24_B75	7	84.45	4.167	87.16	4.07	0.348	41914	2221596	13.4625	0	0	0	0	0.193145	0	0.0244769	0	Bacteria	Pseudomonadota	Gammaproteobacteria	Methylococcales	Methylomonadaceae	WTBX01		d__Bacteria;p__Pseudomonadota;c__Gammaproteobacteria;o__Methylococcales;f__Methylomonadaceae;g__WTBX01;s__
Aegir_M24_B76	3	91.06	1.469	86.75	0.7	0.555	30573	3121772	0.234461	0.0113229	0	0.00359947	0.0133957	0.00297224	0.0265097	0.00663986	0	Bacteria	Pseudomonadota	Alphaproteobacteria	Rhodobacterales	Rhodobacteraceae	Profundibacter		d__Bacteria;p__Pseudomonadota;c__Alphaproteobacteria;o__Rhodobacterales;f__Rhodobacteraceae;g__Profundibacter;s__
Aegir_M24_B77	2	91.39	0.632	87.38	0.44	0.409	18215	2143239	0.0919558	0.00181752	0	0.0122535	0.0118007	0.0120677	0.0120239	0.00362985	0	Bacteria	Campylobacterota	Campylobacteria	Campylobacterales	Sulfurovaceae	SZUA-451		d__Bacteria;p__Campylobacterota;c__Campylobacteria;o__Campylobacterales;f__Sulfurovaceae;g__SZUA-451;s__
Aegir_M24_B78	5	75.69	1.923	73.17	2.36	0.524	5150	3298624	0.0529794	0.0051512	0	0	0.0415798	0.00821723	0.052893	0.0130407	0	Bacteria	Pseudomonadota	Gammaproteobacteria	Pseudomonadales	Halieaceae	Halioglobus		d__Bacteria;p__Pseudomonadota;c__Gammaproteobacteria;o__Pseudomonadales;f__Halieaceae;g__Halioglobus;s__
Aegir_M24_B79	0	90.59	2.056	84.87	0.95	0.455	11281	2488929	0.0644771	0	0	0	0.00332844	0	0	0	0	Bacteria	Pseudomonadota	Alphaproteobacteria	Caulobacterales	Maricaulaceae	Robiginitomaculum_A	Robiginitomaculum_A sp024278915	d__Bacteria;p__Pseudomonadota;c__Alphaproteobacteria;o__Caulobacterales;f__Maricaulaceae;g__Robiginitomaculum_A;s__Robiginitomaculum_A sp024278915
Aegir_M24_B8	4	82.55	5.737	74.9	5.52	0.341	8537	2102014	0.248592	0.014615	0	0.298218	0.0707264	0.00383564	0.00633956	0.21902	0	Bacteria	Campylobacterota	Campylobacteria	Campylobacterales	Sulfurovaceae	UBA1140		d__Bacteria;p__Campylobacterota;c__Campylobacteria;o__Campylobacterales;f__Sulfurovaceae;g__UBA1140;s__
Aegir_M24_B80	4	100	2.136	95.82	1.77	0.685	121534	3534123	0.0497628	0.0106182	0	0.00167181	0	0	0.0149367	0	0.0046643	Bacteria	Actinomycetota	Acidimicrobiia	Acidimicrobiales	Poriferisodaliceae	DRKF01		d__Bacteria;p__Actinomycetota;c__Acidimicrobiia;o__Acidimicrobiales;f__Poriferisodaliceae;g__DRKF01;s__
Aegir_M24_B81	0	87.1	0.495	91.01	0.07	0.339	18477	3118306	0.0242784	0.0105749	0	0.152639	0	0	0.0406917	0	0	Bacteria	Bacteroidota	Bacteroidia	Chitinophagales	Saprospiraceae			d__Bacteria;p__Bacteroidota;c__Bacteroidia;o__Chitinophagales;f__Saprospiraceae;g__;s__
Aegir_M24_B82	0	93.2	1.941	98.19	0.74	0.334	24663	2096509	0.31112	0.0117822	0	0	0	0.0471545	0.0081555	0.0047482	0.00124885	Archaea	Thermoproteota	Nitrososphaeria	Nitrososphaerales	Nitrosopumilaceae	Nitrosopumilus		d__Archaea;p__Thermoproteota;c__Nitrososphaeria;o__Nitrososphaerales;f__Nitrosopumilaceae;g__Nitrosopumilus;s__
Aegir_M24_B83	0	78.79	2.564	82.46	3.04	0.37	5587	1763477	0.0276176	0.00377027	0	0.0216659	0.0315489	0.00895979	0.0327003	0.00183091	0	Bacteria	Campylobacterota	Campylobacteria	Campylobacterales	QNZT01	JANTGR01		d__Bacteria;p__Campylobacterota;c__Campylobacteria;o__Campylobacterales;f__QNZT01;g__JANTGR01;s__
Aegir_M24_B84	5	83.65	1.977	85.31	1.25	0.397	18911	1859126	0.151326	0.132306	0.00219948	1.35584	0.0180853	0.00949016	0.751164	0.0502232	0	Bacteria	Pseudomonadota	Gammaproteobacteria	Nitrosococcales	Methylophagaceae	GCA-002733105		d__Bacteria;p__Pseudomonadota;c__Gammaproteobacteria;o__Nitrosococcales;f__Methylophagaceae;g__GCA-002733105;s__
Aegir_M24_B85	2	95.9	5.555	96.31	3.68	0.618	8612	5165471	0.0320913	0.0140996	0	0	0	0	0.019412	0	0	Bacteria	Chloroflexota	Anaerolineae	Caldilineales	Caldilineaceae	JAJRVT01		d__Bacteria;p__Chloroflexota;c__Anaerolineae;o__Caldilineales;f__Caldilineaceae;g__JAJRVT01;s__
Aegir_M24_B86	15	81.18	4.559	73.86	2.54	0.437	5139	2589560	0.22394	0	0	0	0	0	0.0550529	0	0	Bacteria	Planctomycetota	JADGBV01	JADGBV01	JADGBV01			d__Bacteria;p__Planctomycetota;c__JADGBV01;o__JADGBV01;f__JADGBV01;g__;s__
Aegir_M24_B87	2	85.13	4.932	79.17	4.24	0.32	23716	2875335	0.0593919	0.0127137	0	0.103985	0.0983679	0.0122098	0.536828	0.00689958	0	Bacteria	Bacteroidota	Bacteroidia	Flavobacteriales	Flavobacteriaceae	Lutimonas		d__Bacteria;p__Bacteroidota;c__Bacteroidia;o__Flavobacteriales;f__Flavobacteriaceae;g__Lutimonas;s__
Aegir_M24_B88	3	83.45	1.838	86.27	0.96	0.304	22161	2382783	0.113042	0.00282563	0	0.0122875	0.0184734	0.00412373	0.0639728	0.00747102	0	Bacteria	Bacteroidota	Bacteroidia	Flavobacteriales	Flavobacteriaceae	Lutimonas		d__Bacteria;p__Bacteroidota;c__Bacteroidia;o__Flavobacteriales;f__Flavobacteriaceae;g__Lutimonas;s__
Aegir_M24_B89	3	87.21	2.566	91.76	0.44	0.557	8666	2649591	0.0240412	0.0111519	0	0.00366682	0	0.00432551	0.32677	0.00422544	0	Bacteria	Pseudomonadota	Gammaproteobacteria	Chromatiales	Sedimenticolaceae	Thiolapillus		d__Bacteria;p__Pseudomonadota;c__Gammaproteobacteria;o__Chromatiales;f__Sedimenticolaceae;g__Thiolapillus;s__
Aegir_M24_B9	3	88.51	0	83.43	0.07	0.433	15725	1659385	0.0505653	0.000933063	0.275416	0.0705353	0	0	0	0	0	Bacteria	Pseudomonadota	Gammaproteobacteria	Thiomicrospirales	Thiomicrospiraceae	Thiomicrorhabdus		d__Bacteria;p__Pseudomonadota;c__Gammaproteobacteria;o__Thiomicrospirales;f__Thiomicrospiraceae;g__Thiomicrorhabdus;s__
Aegir_M24_B90	6	63.79	0	89.04	0.28	0.388	67343	2411718	0.162031	0	0	0	0	0	0	0	0	Bacteria	Pseudomonadota	Gammaproteobacteria	UBA6429	UBA6429	SZUA-37		d__Bacteria;p__Pseudomonadota;c__Gammaproteobacteria;o__UBA6429;f__UBA6429;g__SZUA-37;s__
Aegir_M24_B91	3	89.02	0.997	93.34	0.2	0.365	56312	2125544	3.64603	0	0	0	0	0	0	0.00323872	0	Bacteria	Pseudomonadota	Gammaproteobacteria	Beggiatoales	Beggiatoaceae	BB2		d__Bacteria;p__Pseudomonadota;c__Gammaproteobacteria;o__Beggiatoales;f__Beggiatoaceae;g__BB2;s__
Aegir_M24_B92	3	98.06	0.268	97.53	0.91	0.466	12833	3673726	0.0689428	0.000652868	0	0	0	0	0.0192665	0.00592527	0	Bacteria	Bacteroidota	Bacteroidia	Flavobacteriales	PHOS-HE28			d__Bacteria;p__Bacteroidota;c__Bacteroidia;o__Flavobacteriales;f__PHOS-HE28;g__;s__
Aegir_M24_B93	3	90.84	2.691	85.86	0.59	0.432	19024	2787379	0.21371	0.00306482	0	0	0.0280517	0.0183469	0	0.0423317	0	Bacteria	Pseudomonadota	Gammaproteobacteria	SZUA-229	SZUA-229	S010-25		d__Bacteria;p__Pseudomonadota;c__Gammaproteobacteria;o__SZUA-229;f__SZUA-229;g__S010-25;s__
Aegir_M24_B94	2	94.82	8.62	95.35	2.02	0.431	53519	4164344	0.175932	0.00216578	0	0	0	0.0147568	0	0.0848616	0	Bacteria	Pseudomonadota	Gammaproteobacteria	Pseudomonadales	Azotimanducaceae_A	JAHRVQ01		d__Bacteria;p__Pseudomonadota;c__Gammaproteobacteria;o__Pseudomonadales;f__Azotimanducaceae_A;g__JAHRVQ01;s__
Aegir_M24_B95	3	50.85	1.639	44.18	0.61	0.374	11244	842187	0.181365	0.0322653	0	0.0530169	0.0400015	0.0142254	0.0427851	0.0149851	0	Bacteria	Campylobacterota	Campylobacteria	Campylobacterales	Sulfurovaceae	Sulfurovum		d__Bacteria;p__Campylobacterota;c__Campylobacteria;o__Campylobacterales;f__Sulfurovaceae;g__Sulfurovum;s__
Aegir_M24_B96	5	88.4	2.298	96.42	0.78	0.406	10873	2622994	0.76919	0.00199681	0	0	0	0	0	0	0	Bacteria	Pseudomonadota	Gammaproteobacteria	Thiotrichales	Thiotrichaceae	JAGLBW01		d__Bacteria;p__Pseudomonadota;c__Gammaproteobacteria;o__Thiotrichales;f__Thiotrichaceae;g__JAGLBW01;s__
Aegir_M24_B97	5	95.56	1.117	99.16	0.8	0.53	72992	2740816	0.127732	0	0	0	0	0.0016581	0	0.0206329	0	Bacteria	Pseudomonadota	Alphaproteobacteria	Rhodobacterales	Rhodobacteraceae	UBA3077		d__Bacteria;p__Pseudomonadota;c__Alphaproteobacteria;o__Rhodobacterales;f__Rhodobacteraceae;g__UBA3077;s__
Aegir_M24_B98	4	80.37	1.952	83.35	1.14	0.592	6547	2700475	0.0572952	0.00424825	0	0.0113089	0	0	0.0247947	0	0	Bacteria	Pseudomonadota	Alphaproteobacteria	Rhodobacterales	Rhodobacteraceae	JAAEUB01		d__Bacteria;p__Pseudomonadota;c__Alphaproteobacteria;o__Rhodobacterales;f__Rhodobacteraceae;g__JAAEUB01;s__
Aegir_M24_B99	5	94.25	1.899	100	1.37	0.604	16482	3731103	0.101083	0.00166535	0	0.00189927	0.0180731	0.0199	0.0125075	0.00422384	0	Bacteria	Pseudomonadota	Alphaproteobacteria	Rhodobacterales	Rhodobacteraceae	NVQY01		d__Bacteria;p__Pseudomonadota;c__Alphaproteobacteria;o__Rhodobacterales;f__Rhodobacteraceae;g__NVQY01;s__
Aegir_M25_B1	2	86.86	0	82.57	0	0.384	7374	1151142	0.00307167	0.0233517	0	0	0	0	0.00485328	0	0	Bacteria	Pseudomonadota	Alphaproteobacteria	JAGPBS01				d__Bacteria;p__Pseudomonadota;c__Alphaproteobacteria;o__JAGPBS01;f__;g__;s__
Aegir_M25_B10	4	99.6	0.1	99.7	0	0.61	268182	2466269	0.0389436	0.036702	0.00288137	0	0	0	0.0182985	0.00249717	0	Bacteria	Pseudomonadota	Alphaproteobacteria	Rhodobacterales	Rhodobacteraceae	UBA3077		d__Bacteria;p__Pseudomonadota;c__Alphaproteobacteria;o__Rhodobacterales;f__Rhodobacteraceae;g__UBA3077;s__
Aegir_M25_B100	1	90.24	0	87.92	0.51	0.298	14323	1337515	0	0.174967	0.540379	0.00677831	0	0	0.0289446	0	0.331474	Bacteria	Aquificota	Aquificae	Hydrogenothermales	Hydrogenothermaceae	QNZC01		d__Bacteria;p__Aquificota;c__Aquificae;o__Hydrogenothermales;f__Hydrogenothermaceae;g__QNZC01;s__
Aegir_M25_B101	1	88.46	0	93.73	2.23	0.436	22824	1953368	0	0.107048	0	0	0	0	0	0	0	Bacteria	WOR-3	Hydrothermia	B15-G9	WFZT01	WFZT01		d__Bacteria;p__WOR-3;c__Hydrothermia;o__B15-G9;f__WFZT01;g__WFZT01;s__
Aegir_M25_B102	6	89.93	0.634	84.97	0.11	0.406	17765	2717089	0.062694	0.0118794	0	0	0	0	0.0995119	0	0	Bacteria	Pseudomonadota	Gammaproteobacteria	Methylococcales	Methylomonadaceae	JALSJK01	JALSJK01 sp026989395	d__Bacteria;p__Pseudomonadota;c__Gammaproteobacteria;o__Methylococcales;f__Methylomonadaceae;g__JALSJK01;s__JALSJK01 sp026989395
Aegir_M25_B103	4	94.62	1.922	98.35	2.38	0.638	21232	2678675	0.00779541	0.130834	0.0144161	0	0	0	0.0162029	0	0.0722155	Bacteria	Pseudomonadota	Alphaproteobacteria	Rhodobacterales	Rhodobacteraceae	JAAEUB01		d__Bacteria;p__Pseudomonadota;c__Alphaproteobacteria;o__Rhodobacterales;f__Rhodobacteraceae;g__JAAEUB01;s__
Aegir_M25_B104	1	80.03	1.098	83.4	0.38	0.391	7575	1663084	0	0.0219015	0.00338812	0	0	0	0.0226172	0	0	Bacteria	WOR-3	Hydrothermia	UBA1063	CAJXJZ01	CAJXJZ01		d__Bacteria;p__WOR-3;c__Hydrothermia;o__UBA1063;f__CAJXJZ01;g__CAJXJZ01;s__
Aegir_M25_B105	2	85.17	6.515	82.5	5.69	0.619	8521	3044805	0	0.153209	0	0.00490201	0	0	0.0236814	0	0.0146754	Bacteria	Chloroflexota	Anaerolineae	Aggregatilineales	Aggregatilineaceae	JALSSH01		d__Bacteria;p__Chloroflexota;c__Anaerolineae;o__Aggregatilineales;f__Aggregatilineaceae;g__JALSSH01;s__
Aegir_M25_B106	7	93.33	1.302	98.46	0.08	0.397	17789	2081714	0.156997	0.148942	0.0036094	1.42759	0.0253592	0.0118027	0.804674	0.0798622	0	Bacteria	Pseudomonadota	Gammaproteobacteria	Nitrosococcales	Methylophagaceae	GCA-002733105		d__Bacteria;p__Pseudomonadota;c__Gammaproteobacteria;o__Nitrosococcales;f__Methylophagaceae;g__GCA-002733105;s__
Aegir_M25_B107	0	93.38	0.934	99.49	2.54	0.518	62726	1640506	0	0.0542962	0	0	0	0	0	0	0	Archaea	Thermoproteota	Korarchaeia	Korarchaeales	Korarchaeaceae	JAOZFG01	JAOZFG01 sp027491435	d__Archaea;p__Thermoproteota;c__Korarchaeia;o__Korarchaeales;f__Korarchaeaceae;g__JAOZFG01;s__JAOZFG01 sp027491435
Aegir_M25_B108	5	94.01	0.44	91.2	0	0.676	23362	2577715	0.00671377	0.601667	0	0.00119022	0	0	0.0503012	0	0.0163043	Bacteria	Pseudomonadota	Gammaproteobacteria	J113	J113	J113		d__Bacteria;p__Pseudomonadota;c__Gammaproteobacteria;o__J113;f__J113;g__J113;s__
Aegir_M25_B109	1	68.1	2.106	67.55	0.07	0.409	3999	1040823	0	0.271463	0	0	0	0	0	0	0	Archaea	Thermoproteota	Thermoprotei_A	Sulfolobales	Desulfurococcaceae	JALVIT01		d__Archaea;p__Thermoproteota;c__Thermoprotei_A;o__Sulfolobales;f__Desulfurococcaceae;g__JALVIT01;s__
Aegir_M25_B11	2	98.98	3.086	95.6	1.67	0.686	16782	3456424	0.043808	0.0109517	0	0.00148483	0	0	0.0138918	0	0.00436022	Bacteria	Actinomycetota	Acidimicrobiia	Acidimicrobiales	Poriferisodaliceae	DRKF01		d__Bacteria;p__Actinomycetota;c__Acidimicrobiia;o__Acidimicrobiales;f__Poriferisodaliceae;g__DRKF01;s__
Aegir_M25_B110	2	87.62	0.828	86.42	0.83	0.427	8350	1492364	0	0.0247492	0	0	0	0	0	0	0	Bacteria	Pseudomonadota	Gammaproteobacteria	Legionellales	Legionellaceae	Legionella_A		d__Bacteria;p__Pseudomonadota;c__Gammaproteobacteria;o__Legionellales;f__Legionellaceae;g__Legionella_A;s__
Aegir_M25_B111	0	83.64	0.934	92.44	1.17	0.528	60704	677018	0	0.0340993	0	0	0	0	0	0	0	Archaea	Iainarchaeota	Iainarchaeia	JAADDC01	JAADDC01			d__Archaea;p__Iainarchaeota;c__Iainarchaeia;o__JAADDC01;f__JAADDC01;g__;s__
Aegir_M25_B112	0	90.85	0.81	82	0	0.443	8341	1505654	0	0.0215643	0	0	0	0	0	0	0	Archaea	Halobacteriota	Archaeoglobi	Archaeoglobales	Archaeoglobaceae	JdFR-41		d__Archaea;p__Halobacteriota;c__Archaeoglobi;o__Archaeoglobales;f__Archaeoglobaceae;g__JdFR-41;s__
Aegir_M25_B113	2	79.91	4.674	80.01	2.02	0.499	5872	1802874	0.00299203	0.0948737	0	0	0	0	0	0	0.00996929	Bacteria	Aquificota	Aquificae	Aquificales	Aquificaceae	Hydrogenivirga		d__Bacteria;p__Aquificota;c__Aquificae;o__Aquificales;f__Aquificaceae;g__Hydrogenivirga;s__
Aegir_M25_B114	0	93.58	0.823	96.55	0.44	0.494	22986	2461657	0.0672324	0.0211957	0	0.00882617	0	0.00194216	0.135802	0.00302975	0	Bacteria	Pseudomonadota	Alphaproteobacteria	Caulobacterales	Maricaulaceae	Robiginitomaculum_A		d__Bacteria;p__Pseudomonadota;c__Alphaproteobacteria;o__Caulobacterales;f__Maricaulaceae;g__Robiginitomaculum_A;s__
Aegir_M25_B115	1	87	1.709	93.46	2.32	0.361	15575	2096814	0	0.130417	0.00315287	0.00171355	0	0	0.0184766	0	0.00252371	Bacteria	Acidobacteriota	Holophagae	Thermotomaculales	Thermotomaculaceae	Thermotomaculum		d__Bacteria;p__Acidobacteriota;c__Holophagae;o__Thermotomaculales;f__Thermotomaculaceae;g__Thermotomaculum;s__
Aegir_M25_B116	0	96.14	0.671	93.42	0.09	0.319	25938	2204050	0.00561977	0.075296	0	0.00731213	0	0.00329411	0.0507781	0.00582742	0	Bacteria	Bacteroidota	Bacteroidia	Flavobacteriales	Flavobacteriaceae	Polaribacter		d__Bacteria;p__Bacteroidota;c__Bacteroidia;o__Flavobacteriales;f__Flavobacteriaceae;g__Polaribacter;s__
Aegir_M25_B117	0	76.78	1.19	59.48	0.09	0.395	59146	774619	0	0.0468764	0.000852959	0	0	0	0	0	0	Archaea	Thermoproteota	Thermoprotei_A	Sulfolobales	WANQ01	JALWGO01		d__Archaea;p__Thermoproteota;c__Thermoprotei_A;o__Sulfolobales;f__WANQ01;g__JALWGO01;s__
Aegir_M25_B118	0	63.21	1.724	78.46	0.94	0.347	9257	585946	0	0.0234877	0	0	0	0	0.00192764	0	0	Bacteria	Patescibacteria	WWE3	2-01-FULL-39-13				d__Bacteria;p__Patescibacteria;c__WWE3;o__2-01-FULL-39-13;f__;g__;s__
Aegir_M25_B119	0	82.47	0	94.17	0.16	0.579	59771	702704	0	0.0949572	0	0	0	0	0	0	0	Archaea	Iainarchaeota	Iainarchaeia	JAADDC01	JAADDC01			d__Archaea;p__Iainarchaeota;c__Iainarchaeia;o__JAADDC01;f__JAADDC01;g__;s__
Aegir_M25_B12	2	92.85	0	90.99	1.85	0.76	20590	4252721	0	0.0323151	0	0	0	0	0	0	0	Bacteria	Myxococcota	UBA796	UBA796	UBA2385	S143-5		d__Bacteria;p__Myxococcota;c__UBA796;o__UBA796;f__UBA2385;g__S143-5;s__
Aegir_M25_B120	0	93.69	0	91.33	0.16	0.364	36134	899366	0	0.0327498	0	0	0	0	0	0	0	Archaea	Micrarchaeota	Micrarchaeia	Anstonellales	Bilamarchaeaceae			d__Archaea;p__Micrarchaeota;c__Micrarchaeia;o__Anstonellales;f__Bilamarchaeaceae;g__;s__
Aegir_M25_B121	2	91.72	0.595	89.51	1.27	0.594	7792	1632506	0	0.0249264	0	0	0	0	0	0	0	Bacteria	Desulfobacterota	Dissulfuribacteria	Dissulfuribacterales	S140-46	S140-46		d__Bacteria;p__Desulfobacterota;c__Dissulfuribacteria;o__Dissulfuribacterales;f__S140-46;g__S140-46;s__
Aegir_M25_B122	7	94.77	1.206	97.45	0.35	0.591	51419	2390943	0.0048757	0.677624	0	0	0	0	0.0131076	0	0.0963946	Bacteria	Pseudomonadota	Gammaproteobacteria	Methylococcales	Methylothermaceae	Methylohalobius		d__Bacteria;p__Pseudomonadota;c__Gammaproteobacteria;o__Methylococcales;f__Methylothermaceae;g__Methylohalobius;s__
Aegir_M25_B123	1	59.49	0	74.64	0.34	0.462	65996	1312167	0	0.0397277	0	0	0	0	0	0	0	Archaea	Thermoproteota	Thermoprotei_A	Sulfolobales	Desulfurococcaceae	WAON01		d__Archaea;p__Thermoproteota;c__Thermoprotei_A;o__Sulfolobales;f__Desulfurococcaceae;g__WAON01;s__
Aegir_M25_B124	3	90.9	1.09	97.85	0.45	0.578	31909	3571257	0.00435924	0.0581277	0	0	0	0	0.0226732	0	0	Bacteria	Chloroflexota	Anaerolineae	J102	J102	M2005		d__Bacteria;p__Chloroflexota;c__Anaerolineae;o__J102;f__J102;g__M2005;s__
Aegir_M25_B125	6	96.36	0.909	96.73	1.69	0.564	34447	4588653	0.00392187	0.326367	0	0.0269771	0	0	0.00628911	0	0.00629623	Bacteria	Chloroflexota	Anaerolineae	4572-78	J111	J111		d__Bacteria;p__Chloroflexota;c__Anaerolineae;o__4572-78;f__J111;g__J111;s__
Aegir_M25_B126	0	87.09	1.612	89.42	0.7	0.312	109956	2245313	0	0.0686978	0.00361487	0.00208478	0	0	0.00433806	0	0	Bacteria	Bacteroidota	Bacteroidia	Bacteroidales	S143-33			d__Bacteria;p__Bacteroidota;c__Bacteroidia;o__Bacteroidales;f__S143-33;g__;s__
Aegir_M25_B127	8	99.94	0.917	99.99	0.35	0.658	251424	5643620	0.00374696	0.0429779	0.0485541	0	0	0.00499479	0	0.00147429	0	Bacteria	Pseudomonadota	Gammaproteobacteria	Burkholderiales	Burkholderiaceae	Ralstonia	Ralstonia sp913056305	d__Bacteria;p__Pseudomonadota;c__Gammaproteobacteria;o__Burkholderiales;f__Burkholderiaceae;g__Ralstonia;s__Ralstonia sp913056305
Aegir_M25_B128	1	100	0	92.05	0.18	0.488	65142	1796424	0	0.0664674	0	0.0051928	0	0	0	0	0	Bacteria	Thermotogota	Thermotogae	Thermotogales	Thermotogaceae			d__Bacteria;p__Thermotogota;c__Thermotogae;o__Thermotogales;f__Thermotogaceae;g__;s__
Aegir_M25_B129	1	85.97	0.464	88.18	2.91	0.295	28913	1468616	0	0.0408807	0.0468105	0	0	0	0.00259161	0	0.156501	Bacteria	Aquificota	Aquificae	Hydrogenothermales	Hydrogenothermaceae	Hydrogenothermus		d__Bacteria;p__Aquificota;c__Aquificae;o__Hydrogenothermales;f__Hydrogenothermaceae;g__Hydrogenothermus;s__
Aegir_M25_B13	7	92.36	1.612	97.27	1.56	0.744	246362	4576808	0	0.138717	0	0	0	0	0	0	0.0141792	Bacteria	Myxococcota	UBA796	UBA796				d__Bacteria;p__Myxococcota;c__UBA796;o__UBA796;f__;g__;s__
Aegir_M25_B130	2	100	0	99.67	0.02	0.369	40674	3135625	0.0559128	0.0364282	0	0.402201	0.00447415	0.00376661	0.183986	0	0	Bacteria	Bacteroidota	Bacteroidia	Flavobacteriales	Salibacteraceae	CAJXZP01		d__Bacteria;p__Bacteroidota;c__Bacteroidia;o__Flavobacteriales;f__Salibacteraceae;g__CAJXZP01;s__
Aegir_M25_B131	4	91.86	2.845	86.59	1.31	0.291	43380	1567536	0	0.119306	0.0438962	0	0	0	0.00634231	0	0.507253	Bacteria	Aquificota	Aquificae	Hydrogenothermales	Hydrogenothermaceae	Hydrogenothermus		d__Bacteria;p__Aquificota;c__Aquificae;o__Hydrogenothermales;f__Hydrogenothermaceae;g__Hydrogenothermus;s__
Aegir_M25_B132	1	96.2	0.632	99.85	0.77	0.565	34593	1459794	0	0.462249	0.00507875	0.00124293	0	0	0	0	0	Archaea	Thermoproteota	Thermoprotei_A	Sulfolobales	NBVN01	WAOK01		d__Archaea;p__Thermoproteota;c__Thermoprotei_A;o__Sulfolobales;f__NBVN01;g__WAOK01;s__
Aegir_M25_B133	1	87.09	0	90.76	0.08	0.317	23481	2425709	0.00182341	0.0465732	0	0.00519542	0.00306639	0.00130938	0.0330728	0.00229218	0	Bacteria	Bacteroidota	Bacteroidia	Flavobacteriales	CAJJDF01	CAJJDF01		d__Bacteria;p__Bacteroidota;c__Bacteroidia;o__Flavobacteriales;f__CAJJDF01;g__CAJJDF01;s__
Aegir_M25_B134	3	83.43	1.151	75.78	0.2	0.275	10848	1261751	0	0.064829	0.0259915	0.00364118	0	0.00413759	0.00524189	0	0	Bacteria	Campylobacterota	Campylobacteria	Campylobacterales				d__Bacteria;p__Campylobacterota;c__Campylobacteria;o__Campylobacterales;f__;g__;s__
Aegir_M25_B135	0	72.7	2.845	64.12	3.27	0.268	5008	1030589	0	0.0276762	0.0841939	0.00569639	0	0.00305285	0.00969363	0	0	Bacteria	Campylobacterota	Campylobacteria	Campylobacterales				d__Bacteria;p__Campylobacterota;c__Campylobacteria;o__Campylobacterales;f__;g__;s__
Aegir_M25_B136	1	97.76	0.746	100	0.04	0.711	103152	2594815	0.00113321	0.113651	0.00180462	0	0	0	0	0	0.287242	Bacteria	Pseudomonadota	Alphaproteobacteria	Geminicoccales	Geminicoccaceae	HRBIN39		d__Bacteria;p__Pseudomonadota;c__Alphaproteobacteria;o__Geminicoccales;f__Geminicoccaceae;g__HRBIN39;s__
Aegir_M25_B137	1	69.98	0	64.58	0.36	0.24	8501	1093162	0	0.0223675	0	0	0	0	0.00127652	0	0	Bacteria	DRYD01	DRYD01					d__Bacteria;p__DRYD01;c__DRYD01;o__;f__;g__;s__
Aegir_M25_B138	3	97.7	0.574	94.73	0.02	0.633	213535	2524375	0.0339626	0.83038	0	0	0	0	0	0	0.0189194	Bacteria	Pseudomonadota	Gammaproteobacteria	S140-43	S140-43	S140-43		d__Bacteria;p__Pseudomonadota;c__Gammaproteobacteria;o__S140-43;f__S140-43;g__S140-43;s__
Aegir_M25_B139	2	96	0.352	96.98	0.43	0.661	99589	2613426	0.00438377	0.677756	0	0	0	0	0	0	0.412669	Bacteria	Pseudomonadota	Gammaproteobacteria	J048	J048	J048		d__Bacteria;p__Pseudomonadota;c__Gammaproteobacteria;o__J048;f__J048;g__J048;s__
Aegir_M25_B14	6	83.24	1.604	85.88	0.37	0.367	9649	3141385	0.00596413	0.0732404	0	0.0373276	0	0.00946365	0.148477	0.0033435	0	Bacteria	Pseudomonadota	Gammaproteobacteria	Beggiatoales	Beggiatoaceae	JAUXCJ01		d__Bacteria;p__Pseudomonadota;c__Gammaproteobacteria;o__Beggiatoales;f__Beggiatoaceae;g__JAUXCJ01;s__
Aegir_M25_B140	1	98.78	2.479	99.17	2.86	0.38	14977	2332725	0.0101244	0.034382	0	0.0165706	0	0.0144133	0.00601079	0	0	Bacteria	Campylobacterota	Campylobacteria	Campylobacterales	Sulfurimonadaceae	BB10		d__Bacteria;p__Campylobacterota;c__Campylobacteria;o__Campylobacterales;f__Sulfurimonadaceae;g__BB10;s__
Aegir_M25_B141	0	87.34	1.476	83.78	0.21	0.529	86616	1336339	0.00442211	0.0601037	0.00757445	0	0	0	0	0	0	Archaea	Thermoproteota	Thermoprotei_A	Sulfolobales	Acidilobaceae			d__Archaea;p__Thermoproteota;c__Thermoprotei_A;o__Sulfolobales;f__Acidilobaceae;g__;s__
Aegir_M25_B142	1	92.72	2	97.5	0.41	0.531	26389	3393641	0.00284872	0.147996	0	0.015253	0	0	0.0250822	0	0	Bacteria	Chloroflexota	Anaerolineae	4572-78	4572-78	JANTHQ01		d__Bacteria;p__Chloroflexota;c__Anaerolineae;o__4572-78;f__4572-78;g__JANTHQ01;s__
Aegir_M25_B143	0	50.92	0.467	40.71	0.19	0.343	3500	776565	0	0.0156188	0	0	0	0	0	0	0	Archaea	Thermoproteota	JANJXX01	Panguiarchaeales	Panguiarchaeaceae	JAHKLH01		d__Archaea;p__Thermoproteota;c__JANJXX01;o__Panguiarchaeales;f__Panguiarchaeaceae;g__JAHKLH01;s__
Aegir_M25_B144	4	86.68	0.689	86.05	0.79	0.392	15580	2626641	0.132293	0.269924	0	0.0684406	0.0418966	0.00202438	0.107721	0	0	Bacteria	Pseudomonadota	Gammaproteobacteria	Thiotrichales	Thiotrichaceae	Cocleimonas		d__Bacteria;p__Pseudomonadota;c__Gammaproteobacteria;o__Thiotrichales;f__Thiotrichaceae;g__Cocleimonas;s__
Aegir_M25_B145	0	80.89	1.982	69.33	0.03	0.467	7537	1300903	0	0.0157471	0.0271535	0	0	0	0.0122869	0	0	Bacteria	Campylobacterota	Campylobacteria	Campylobacterales	Hydrogenimonadaceae	Hydrogenimonas		d__Bacteria;p__Campylobacterota;c__Campylobacteria;o__Campylobacterales;f__Hydrogenimonadaceae;g__Hydrogenimonas;s__
Aegir_M25_B146	1	74.53	0	75.1	0.22	0.294	24292	966850	0	0.669446	0.0823969	0.00881615	0	0	0.0300445	0	0.69972	Archaea	Nanoarchaeota	Nanoarchaeia	Nanoarchaeales				d__Archaea;p__Nanoarchaeota;c__Nanoarchaeia;o__Nanoarchaeales;f__;g__;s__
Aegir_M25_B147	2	89.64	2.336	96.28	1.11	0.633	61089	1783303	0	0.034886	0	0	0	0.00309661	0.0308596	0	0	Archaea	Thermoproteota	Korarchaeia	Korarchaeales	Korarchaeaceae	DRBY01	DRBY01 sp027491415	d__Archaea;p__Thermoproteota;c__Korarchaeia;o__Korarchaeales;f__Korarchaeaceae;g__DRBY01;s__DRBY01 sp027491415
Aegir_M25_B148	0	96.95	4.065	96.79	0.18	0.27	18973	2298810	0	0.0722599	0.0280587	0	0	0	0.00650578	0	0.00102551	Bacteria	DYJV01	DYJV01	DYJV01	JALVYZ01	JALVYZ01		d__Bacteria;p__DYJV01;c__DYJV01;o__DYJV01;f__JALVYZ01;g__JALVYZ01;s__
Aegir_M25_B149	0	68.92	0	76.24	1.39	0.273	9197	609627	0	0.168138	0.0509198	0	0	0	0	0	0	Archaea	Nanoarchaeota	Nanoarchaeia	Nanoarchaeales	Nanopusillaceae			d__Archaea;p__Nanoarchaeota;c__Nanoarchaeia;o__Nanoarchaeales;f__Nanopusillaceae;g__;s__
Aegir_M25_B15	8	88.98	1.612	87.72	2.31	0.704	14625	3791755	0	0.0254169	0	0	0	0	0	0	0	Bacteria	Myxococcota	Polyangia	Nannocystales	Nannocystaceae			d__Bacteria;p__Myxococcota;c__Polyangia;o__Nannocystales;f__Nannocystaceae;g__;s__
Aegir_M25_B150	0	99.46	2.15	100	0.56	0.352	31357	2587767	0.00488675	0.150296	0.0487123	0.0109102	0	0	0.0132774	0	0.00607346	Bacteria	Bacteroidota	Bacteroidia	Flavobacteriales	Vicingaceae	UBA852		d__Bacteria;p__Bacteroidota;c__Bacteroidia;o__Flavobacteriales;f__Vicingaceae;g__UBA852;s__
Aegir_M25_B151	0	72.46	0	74.19	0.49	0.494	44427	877847	0.00225484	0.441409	0.0182526	0	0	0	0	0	0	Archaea	Thermoproteota	Thermoprotei_A	Sulfolobales	Pyrodictiaceae	JALSNP01		d__Archaea;p__Thermoproteota;c__Thermoprotei_A;o__Sulfolobales;f__Pyrodictiaceae;g__JALSNP01;s__
Aegir_M25_B152	0	95.88	1.002	95.03	0.06	0.579	67955	1518738	0	0.167849	0.00134682	0	0	0	0	0	0	Archaea	Thermoproteota	Thermoprotei_A	Sulfolobales	Pyrodictiaceae			d__Archaea;p__Thermoproteota;c__Thermoprotei_A;o__Sulfolobales;f__Pyrodictiaceae;g__;s__
Aegir_M25_B153	6	69.02	2.1	64.08	0.6	0.702	4586	4951841	0	0.0193487	0	0.0107655	0	0	0.0110346	0	0	Bacteria	Myxococcota	UBA796	UBA796	GCA-2862545			d__Bacteria;p__Myxococcota;c__UBA796;o__UBA796;f__GCA-2862545;g__;s__
Aegir_M25_B154	3	96.88	3.825	97.21	1.34	0.316	31811	2844560	0.00390642	0.0415456	0	0.0398325	0	0	0.0090136	0	0	Bacteria	Bacteroidota	Kapaibacteriia	Kapaibacteriales	UBA2268	ChocPot-Mid		d__Bacteria;p__Bacteroidota;c__Kapaibacteriia;o__Kapaibacteriales;f__UBA2268;g__ChocPot-Mid;s__
Aegir_M25_B155	2	86.28	0.154	92.03	0.85	0.588	10254	1621266	0	0.0295579	0	0.00452918	0	0	0.00824523	0	0	Bacteria	WOR-3	Hydrothermia					d__Bacteria;p__WOR-3;c__Hydrothermia;o__;f__;g__;s__
Aegir_M25_B156	0	96.61	0.462	94.18	0.19	0.348	41550	2061995	0	0.0332665	0	0	0	0	0	0	0	Bacteria	Atribacterota	JALVIU01	JALVIU01	JALVIU01	JALVIU01		d__Bacteria;p__Atribacterota;c__JALVIU01;o__JALVIU01;f__JALVIU01;g__JALVIU01;s__
Aegir_M25_B157	2	93.45	0.085	92.47	0.08	0.353	55995	1912844	0	0.0324834	0	0.011653	0	0	0.00134544	0	0	Bacteria	Desulfobacterota	Desulfovibrionia	Desulfovibrionales	Desulfohalobiaceae			d__Bacteria;p__Desulfobacterota;c__Desulfovibrionia;o__Desulfovibrionales;f__Desulfohalobiaceae;g__;s__
Aegir_M25_B158	0	90.9	4.545	91.97	2.15	0.633	17356	2489373	0	0.070141	0.00129278	0	0	0	0.0181238	0	0	Bacteria	Chloroflexota	Anaerolineae	Anaerolineales	DRMV01	DUEP01		d__Bacteria;p__Chloroflexota;c__Anaerolineae;o__Anaerolineales;f__DRMV01;g__DUEP01;s__
Aegir_M25_B159	0	98.24	0.526	98.26	0.14	0.391	18747	1579071	0	0.0513813	0.00472794	0.00177904	0	0	0.00148075	0	0	Bacteria	Thermotogota	Thermotogae	Thermotogales	Thermotogaceae			d__Bacteria;p__Thermotogota;c__Thermotogae;o__Thermotogales;f__Thermotogaceae;g__;s__
Aegir_M25_B16	1	95.43	0.537	96.66	0.65	0.32	19163	2395146	0	0.0208297	0.0278473	0	0	0	0	0	0.000950731	Bacteria	Bacteroidota	Bacteroidia	Bacteroidales	JALTDM01	JALTDM01		d__Bacteria;p__Bacteroidota;c__Bacteroidia;o__Bacteroidales;f__JALTDM01;g__JALTDM01;s__
Aegir_M25_B160	0	65.5	0.666	60.63	0.05	0.466	32429	660652	0	0.0730573	0	0.00268272	0	0	0	0	0	Archaea	Thermoproteota	Thermoprotei_A	Sulfolobales	Pyrodictiaceae	Hyperthermus		d__Archaea;p__Thermoproteota;c__Thermoprotei_A;o__Sulfolobales;f__Pyrodictiaceae;g__Hyperthermus;s__
Aegir_M25_B161	0	96.59	0	91.83	0.45	0.534	36679	2758558	0.0268264	0.0177327	0	0.0185761	0.00226579	0	0.0446635	0.00820319	0.00164481	Bacteria	Planctomycetota	Phycisphaerae	Phycisphaerales	UBA1924	UBA1924		d__Bacteria;p__Planctomycetota;c__Phycisphaerae;o__Phycisphaerales;f__UBA1924;g__UBA1924;s__
Aegir_M25_B162	0	68.63	2.272	61.17	2.52	0.621	7420	1576901	0	0.115908	0.0010754	0	0	0	0	0	0	Bacteria	Chloroflexota	Anaerolineae	Anaerolineales	DRMV01	DRMV01		d__Bacteria;p__Chloroflexota;c__Anaerolineae;o__Anaerolineales;f__DRMV01;g__DRMV01;s__
Aegir_M25_B163	1	87.6	0.609	85.85	1.43	0.311	23784	1458079	0.00129007	0.11913	0.673626	0	0	0	0.00933672	0	3.009	Bacteria	Aquificota	Aquificae	Hydrogenothermales	Hydrogenothermaceae	Hydrogenothermus		d__Bacteria;p__Aquificota;c__Aquificae;o__Hydrogenothermales;f__Hydrogenothermaceae;g__Hydrogenothermus;s__
Aegir_M25_B164	1	53.44	0	52.87	0.06	0.281	54046	857689	0	0.0354786	0	0.00275218	0	0	0.0766831	0	0	Bacteria	Campylobacterota	Campylobacteria	Campylobacterales	Nitratiruptoraceae	Nitrosophilus_A		d__Bacteria;p__Campylobacterota;c__Campylobacteria;o__Campylobacterales;f__Nitratiruptoraceae;g__Nitrosophilus_A;s__
Aegir_M25_B165	5	64.68	0	67.19	0.16	0.325	5164	2341076	0.117309	0.00682883	0	0.00981368	0	0.000702567	0.0243619	0	0	Bacteria	Bacteroidota	Ignavibacteria	Ignavibacteriales	Melioribacteraceae	GCA-2746605		d__Bacteria;p__Bacteroidota;c__Ignavibacteria;o__Ignavibacteriales;f__Melioribacteraceae;g__GCA-2746605;s__
Aegir_M25_B166	0	89.54	1.818	92.24	1.02	0.613	81565	2112944	0	0.0782578	0	0.00322297	0	0	0	0	0.0134669	Bacteria	Chloroflexota	Anaerolineae	Anaerolineales	DRMV01	S139-71		d__Bacteria;p__Chloroflexota;c__Anaerolineae;o__Anaerolineales;f__DRMV01;g__S139-71;s__
Aegir_M25_B167	0	70.33	0.915	62.29	0.43	0.336	5169	1214030	0	0.0197111	0	0.00252515	0	0	0.0112033	0	0	Bacteria	Campylobacterota	Campylobacteria	Campylobacterales	SZUA-545	JAOXRY01		d__Bacteria;p__Campylobacterota;c__Campylobacteria;o__Campylobacterales;f__SZUA-545;g__JAOXRY01;s__
Aegir_M25_B168	0	97.83	5.826	95.95	1.58	0.494	142872	1680064	0	0.0493004	0	0	0	0	0	0	0	Bacteria	JALSQH01	JALSQH01					d__Bacteria;p__JALSQH01;c__JALSQH01;o__;f__;g__;s__
Aegir_M25_B169	1	53.44	3.448	50.63	5.79	0.488	3388	1306818	0.00139793	0.0154112	0	0	0	0	0.0482284	0.0718603	0	Bacteria	Pseudomonadota	Gammaproteobacteria	Xanthomonadales	SZUA-36	SZUA-51		d__Bacteria;p__Pseudomonadota;c__Gammaproteobacteria;o__Xanthomonadales;f__SZUA-36;g__SZUA-51;s__
Aegir_M25_B17	2	84.51	1.29	80.93	0.14	0.349	47857	1555333	0	0.232917	0	0.00117752	0	0	0.0429564	0	0	Bacteria	Desulfobacterota	DSM-4660	Desulfatiglandales	JALVZP01			d__Bacteria;p__Desulfobacterota;c__DSM-4660;o__Desulfatiglandales;f__JALVZP01;g__;s__
Aegir_M25_B170	3	85.03	1.073	83.02	0.79	0.285	21080	2179448	0.0810031	0.0146066	0	0.829664	0.0563391	0.00946684	0.156561	0.00224818	0	Bacteria	Bacteroidota	Bacteroidia	Flavobacteriales	Flavobacteriaceae	S010-17		d__Bacteria;p__Bacteroidota;c__Bacteroidia;o__Flavobacteriales;f__Flavobacteriaceae;g__S010-17;s__
Aegir_M25_B171	2	87.7	2.382	91.63	0.16	0.397	11827	2198895	0.350231	0.212097	0	1.36601	0.187318	0.0110429	1.00967	0	0	Bacteria	Pseudomonadota	Gammaproteobacteria	Methylococcales	Methylomonadaceae	Methyloprofundus	Methyloprofundus sp900128525	d__Bacteria;p__Pseudomonadota;c__Gammaproteobacteria;o__Methylococcales;f__Methylomonadaceae;g__Methyloprofundus;s__Methyloprofundus sp900128525
Aegir_M25_B172	1	57.13	1.612	56.53	1.57	0.322	3570	2240088	0.00667692	0.0083232	0	0.0225344	0	0	0.0287229	0	0	Bacteria	Bacteroidota	Bacteroidia	Bacteroidales	NBLH01	NBLH01		d__Bacteria;p__Bacteroidota;c__Bacteroidia;o__Bacteroidales;f__NBLH01;g__NBLH01;s__
Aegir_M25_B173	0	81.89	6.659	83.13	7.44	0.335	8218	1821323	0.0665798	0.0918325	0.102395	0.238095	0.053589	0.0269394	0.0703068	0.0122422	0	Bacteria	Campylobacterota	Campylobacteria	Campylobacterales	Sulfurovaceae	Sulfurovum		d__Bacteria;p__Campylobacterota;c__Campylobacteria;o__Campylobacterales;f__Sulfurovaceae;g__Sulfurovum;s__
Aegir_M25_B174	2	53.41	0	53.26	0.28	0.411	3291	1460277	0	0.0159187	0	0.00300717	0	0	0.00293808	0	0	Bacteria	Myxococcota	SURF-8	SURF-8				d__Bacteria;p__Myxococcota;c__SURF-8;o__SURF-8;f__;g__;s__
Aegir_M25_B175	0	57.31	1.283	61.88	1.39	0.277	3430	1273025	0	0.0169628	0	0	0	0	0	0	0	Bacteria	DYJV01	DYJV01	DYJV01	JALVYZ01	JALVYZ01		d__Bacteria;p__DYJV01;c__DYJV01;o__DYJV01;f__JALVYZ01;g__JALVYZ01;s__
Aegir_M25_B176	0	54.92	2.4	49.48	0.61	0.443	3368	751521	0	0.0210692	0.000947211	0	0	0.00380904	0.0105683	0	0	Archaea	Thermoplasmatota	Thermoplasmata	WALJ01	WALJ01	WALJ01		d__Archaea;p__Thermoplasmatota;c__Thermoplasmata;o__WALJ01;f__WALJ01;g__WALJ01;s__
Aegir_M25_B177	0	69.24	0	71.83	0.34	0.415	5094	630109	0	0.0174386	0	0	0	0	0	0	0	Archaea	Micrarchaeota	Micrarchaeia	Anstonellales				d__Archaea;p__Micrarchaeota;c__Micrarchaeia;o__Anstonellales;f__;g__;s__
Aegir_M25_B178	2	99.36	0.632	99.42	0.62	0.611	76972	1594858	0	0.0668475	0	0	0	0	0	0	0	Archaea	Thermoproteota	Thermoprotei_A	Sulfolobales	WAQK01	JALWQH01		d__Archaea;p__Thermoproteota;c__Thermoprotei_A;o__Sulfolobales;f__WAQK01;g__JALWQH01;s__
Aegir_M25_B18	1	98.31	1.299	99.16	0.83	0.407	58456	1632585	0	0.250647	0	0	0	0	0	0	0	Archaea	Thermoproteota	Thermoprotei_A	Sulfolobales	NBVN01	EX4484-204		d__Archaea;p__Thermoproteota;c__Thermoprotei_A;o__Sulfolobales;f__NBVN01;g__EX4484-204;s__
Aegir_M25_B180	0	79.73	0.917	82.05	2.81	0.572	5448	2510593	0	0.0221509	0	0	0	0	0	0	0	Bacteria	Chloroflexota	Anaerolineae	JAADDB01	JAADDB01			d__Bacteria;p__Chloroflexota;c__Anaerolineae;o__JAADDB01;f__JAADDB01;g__;s__
Aegir_M25_B181	0	87.87	0.909	91.05	1.18	0.636	37597	2216159	0	1.59153	0.00341907	0.00992318	0	0	0.0144812	0	0.0375489	Bacteria	Chloroflexota	Anaerolineae	Anaerolineales	DRMV01	JAADEN01		d__Bacteria;p__Chloroflexota;c__Anaerolineae;o__Anaerolineales;f__DRMV01;g__JAADEN01;s__
Aegir_M25_B182	0	93.47	2.115	90.5	0.22	0.474	11577	1981712	0.00563756	0.118518	0	0.00561628	0	0.00119256	0.0938612	0.00810548	0.00499562	Bacteria	Campylobacterota	Campylobacteria	Campylobacterales	QNZT01	QNZT01		d__Bacteria;p__Campylobacterota;c__Campylobacteria;o__Campylobacterales;f__QNZT01;g__QNZT01;s__
Aegir_M25_B183	0	84.57	0	95.98	0	0.462	73979	714470	0	0.0859357	0	0	0	0	0.00115165	0	0.0056096	Archaea	Aenigmatarchaeota	Aenigmatarchaeia	GW2011-AR5	WALA01			d__Archaea;p__Aenigmatarchaeota;c__Aenigmatarchaeia;o__GW2011-AR5;f__WALA01;g__;s__
Aegir_M25_B184	1	96.83	1.898	99.98	0.13	0.471	121017	1248323	0	0.0488184	0	0	0	0	0	0	0	Archaea	Thermoproteota	Thermoprotei_A	Sulfolobales	Fervidicoccaceae			d__Archaea;p__Thermoproteota;c__Thermoprotei_A;o__Sulfolobales;f__Fervidicoccaceae;g__;s__
Aegir_M25_B185	0	81.64	0.632	79.91	0.02	0.409	94514	1100543	0	0.053772	0	0.00115603	0	0	0.00496435	0	0	Archaea	Thermoproteota	Thermoprotei_A	Sulfolobales	Pyrodictiaceae			d__Archaea;p__Thermoproteota;c__Thermoprotei_A;o__Sulfolobales;f__Pyrodictiaceae;g__;s__
Aegir_M25_B186	0	90.1	1.098	96.13	3.06	0.411	22534	2235681	0	0.0475046	0	0	0	0	0	0	0	Bacteria	WOR-3	Hydrothermia	B15-G9	WFZT01	WFZT01		d__Bacteria;p__WOR-3;c__Hydrothermia;o__B15-G9;f__WFZT01;g__WFZT01;s__
Aegir_M25_B187	4	97.86	0.854	98.62	0.08	0.7	44375	3501040	0.0013635	0.0375424	0	0.00257265	0	0	0.0371091	0	0.00629349	Bacteria	Acidobacteriota	Thermoanaerobaculia	Thermoanaerobaculales	Sulfomarinibacteraceae	JAMOVQ01		d__Bacteria;p__Acidobacteriota;c__Thermoanaerobaculia;o__Thermoanaerobaculales;f__Sulfomarinibacteraceae;g__JAMOVQ01;s__
Aegir_M25_B188	6	91.14	1.848	93.9	0.59	0.57	30301	4874522	0	0.0399499	0	0	0	0.00145373	0.0345322	0	0	Bacteria	KSB1	UBA2214	JACIZP01	JADDFT01	JADDFT01		d__Bacteria;p__KSB1;c__UBA2214;o__JACIZP01;f__JADDFT01;g__JADDFT01;s__
Aegir_M25_B189	2	78.06	4.795	78.39	1.65	0.507	10938	4147427	0	0.0227604	0	0	0	0	0	0	0	Bacteria	Cyanobacteriota	Sericytochromatia	UBA7694	UBA7694	JACYMC01		d__Bacteria;p__Cyanobacteriota;c__Sericytochromatia;o__UBA7694;f__UBA7694;g__JACYMC01;s__
Aegir_M25_B19	0	77.88	0.742	77.16	0.65	0.5	17351	1409726	0.00102247	0.224285	0.507751	0	0	0	0.0155623	0	0.00444308	Archaea	Methanobacteriota_B	Thermococci	Thermococcales	Thermococcaceae	Thermococcus		d__Archaea;p__Methanobacteriota_B;c__Thermococci;o__Thermococcales;f__Thermococcaceae;g__Thermococcus;s__
Aegir_M25_B190	3	96.5	1.925	95.26	0.76	0.556	27139	3275825	0.224697	0.0139384	0	0.010927	0.0146832	0.0033122	0.0262405	0.00778633	0	Bacteria	Pseudomonadota	Alphaproteobacteria	Rhodobacterales	Rhodobacteraceae	Profundibacter		d__Bacteria;p__Pseudomonadota;c__Alphaproteobacteria;o__Rhodobacterales;f__Rhodobacteraceae;g__Profundibacter;s__
Aegir_M25_B191	5	85.6	1.609	79.13	0.62	0.485	9825	1959939	0.110701	0.499589	0.166176	0.0109261	0	0	0.225011	0	0.00469147	Bacteria	Pseudomonadota	Gammaproteobacteria	Methylococcales	Methylomonadaceae	Methylomarinum		d__Bacteria;p__Pseudomonadota;c__Gammaproteobacteria;o__Methylococcales;f__Methylomonadaceae;g__Methylomarinum;s__
Aegir_M25_B192	0	56.32	0.21	46.91	0.44	0.529	53887	758882	0	0.0331442	0.00458403	0	0	0	0	0	0	Archaea	Thermoproteota	Thermoprotei_A	Sulfolobales	Acidilobaceae	S143-63		d__Archaea;p__Thermoproteota;c__Thermoprotei_A;o__Sulfolobales;f__Acidilobaceae;g__S143-63;s__
Aegir_M25_B193	3	77.89	2.576	77.61	0.4	0.583	6699	2296710	0.0920023	0.058843	0	0.314795	0.00143191	0.00500888	0.129534	0	0	Bacteria	Pseudomonadota	Alphaproteobacteria	Rhodobacterales	Rhodobacteraceae	Profundibacter	Profundibacter amoris	d__Bacteria;p__Pseudomonadota;c__Alphaproteobacteria;o__Rhodobacterales;f__Rhodobacteraceae;g__Profundibacter;s__Profundibacter amoris
Aegir_M25_B194	1	59.49	3.106	64.53	0.34	0.398	4353	1237752	0	0.0173353	0	0	0	0	0	0	0	Bacteria	WOR-3	Hydrothermia	WGAB01				d__Bacteria;p__WOR-3;c__Hydrothermia;o__WGAB01;f__;g__;s__
Aegir_M25_B195	1	63.87	2.143	67.74	0.79	0.654	9383	1130264	0	0.0844189	0.409556	0	0	0	0	0	0	Archaea	Thermoproteota	Thermoprotei_A	Sulfolobales	Pyrodictiaceae	QNYQ01		d__Archaea;p__Thermoproteota;c__Thermoprotei_A;o__Sulfolobales;f__Pyrodictiaceae;g__QNYQ01;s__
Aegir_M25_B196	1	81.35	2.595	72.11	1.05	0.354	7242	1581470	0.0138495	0.129812	2.41593	0.00425057	0.00273791	0.0416718	0.139642	0.00210885	0	Bacteria	Campylobacterota	Campylobacteria	Campylobacterales	Sulfurimonadaceae	Sulfurimonas		d__Bacteria;p__Campylobacterota;c__Campylobacteria;o__Campylobacterales;f__Sulfurimonadaceae;g__Sulfurimonas;s__
Aegir_M25_B197	1	51.43	0.406	44.17	1.49	0.421	3090	908911	0.00839286	0.0118495	0	0.00173429	0.0154599	0.0100702	0.0422278	0.00102651	0	Bacteria	Campylobacterota	Campylobacteria	Campylobacterales	Sulfurimonadaceae	S145-25		d__Bacteria;p__Campylobacterota;c__Campylobacteria;o__Campylobacterales;f__Sulfurimonadaceae;g__S145-25;s__
Aegir_M25_B198	2	92.07	1.626	95.18	1.1	0.315	62623	1649003	0	0.271433	0	0	0	0	0.0361021	0	0.101326	Bacteria	Aquificota	Aquificae	Hydrogenothermales	Hydrogenothermaceae			d__Bacteria;p__Aquificota;c__Aquificae;o__Hydrogenothermales;f__Hydrogenothermaceae;g__;s__
Aegir_M25_B199	2	93.81	1.075	95.45	1.11	0.42	28821	3018548	0.00264245	0.880494	0	0.00973855	0	0	0.0165957	0	0.00361166	Bacteria	Bacteroidota	Bacteroidia	Bacteroidales	F082	Sulfidibacterium		d__Bacteria;p__Bacteroidota;c__Bacteroidia;o__Bacteroidales;f__F082;g__Sulfidibacterium;s__
Aegir_M25_B2	0	82.24	0	93.17	1.22	0.328	59953	772805	0	0.0334751	0	0	0	0	0	0	0	Archaea	Aenigmatarchaeota	Aenigmatarchaeia	CG10238-14	SpSt-28	JAGGZO01		d__Archaea;p__Aenigmatarchaeota;c__Aenigmatarchaeia;o__CG10238-14;f__SpSt-28;g__JAGGZO01;s__
Aegir_M25_B20	0	94.04	1.702	99.11	0.02	0.687	74818	1826889	0	0.059588	0.180066	0	0	0	0.00175932	0	1.00156	Bacteria	Deinococcota	Deinococci	Deinococcales	Marinithermaceae	WFXV01		d__Bacteria;p__Deinococcota;c__Deinococci;o__Deinococcales;f__Marinithermaceae;g__WFXV01;s__
Aegir_M25_B200	3	97.2	0.558	99.36	0.09	0.341	65155	2402473	0	0.0773298	0	0.00174107	0	0.00762467	0	0	0	Bacteria	Bacteroidota	Ignavibacteria	Ignavibacteriales	Melioribacteraceae	WGAL01		d__Bacteria;p__Bacteroidota;c__Ignavibacteria;o__Ignavibacteriales;f__Melioribacteraceae;g__WGAL01;s__
Aegir_M25_B201	0	64.55	0.843	64.3	0	0.531	113717	744703	0.00301316	0.0281207	0.0475115	0	0	0	0	0	0	Archaea	Thermoproteota	Thermoprotei_A	Sulfolobales	Acidilobaceae			d__Archaea;p__Thermoproteota;c__Thermoprotei_A;o__Sulfolobales;f__Acidilobaceae;g__;s__
Aegir_M25_B202	0	62.61	3.448	85.34	0.18	0.37	22747	615613	0	0.0399208	0	0	0	0	0	0	0	Bacteria	Patescibacteria	Dojkabacteria	GCA-002793355	GCA-002793355			d__Bacteria;p__Patescibacteria;c__Dojkabacteria;o__GCA-002793355;f__GCA-002793355;g__;s__
Aegir_M25_B203	0	55.2	0.632	51.79	0.67	0.649	12295	997646	0.00233088	0.250902	0.0326774	0	0	0	0.0010939	0	0	Archaea	Thermoproteota	Thermoprotei_A	Sulfolobales	Acidilobaceae	JALSQL01		d__Archaea;p__Thermoproteota;c__Thermoprotei_A;o__Sulfolobales;f__Acidilobaceae;g__JALSQL01;s__
Aegir_M25_B204	0	100	2.531	99.11	0.53	0.444	29077	1628985	0	0.0333536	0	0	0	0	0	0	0	Archaea	Thermoproteota	Thermoprotei_A	Sulfolobales	Acidilobaceae	JALWTO01		d__Archaea;p__Thermoproteota;c__Thermoprotei_A;o__Sulfolobales;f__Acidilobaceae;g__JALWTO01;s__
Aegir_M25_B205	4	60.34	0	61.41	2.05	0.426	5116	1404472	0.10325	0.0112187	0	0.0444184	0.0340076	0.00991787	0.0193032	0.0359124	0	Bacteria	Pseudomonadota	Gammaproteobacteria	Nitrosococcales	Methylophagaceae	GCA-002733105		d__Bacteria;p__Pseudomonadota;c__Gammaproteobacteria;o__Nitrosococcales;f__Methylophagaceae;g__GCA-002733105;s__
Aegir_M25_B206	0	94.09	0	93.29	1.47	0.496	62308	3401373	0	0.0371968	0	0	0	0	0	0	0.011851	Bacteria	Chloroflexota	Anaerolineae	Aggregatilineales	Phototrophicaceae	S146-30		d__Bacteria;p__Chloroflexota;c__Anaerolineae;o__Aggregatilineales;f__Phototrophicaceae;g__S146-30;s__
Aegir_M25_B207	0	88.07	1.189	89.81	0.65	0.405	8139	1975710	0	0.0210092	0	0.0173517	0	0	0.00649478	0	0	Bacteria	Spirochaetota	Brevinematia	Brevinematales	GWF1-51-8			d__Bacteria;p__Spirochaetota;c__Brevinematia;o__Brevinematales;f__GWF1-51-8;g__;s__
Aegir_M25_B208	0	78.12	2.336	87.81	0.92	0.525	13548	616338	0	0.029168	0.00232818	0	0	0	0	0	0	Archaea	Iainarchaeota	Iainarchaeia	JAADDC01	JAADDC01	JAADDC01		d__Archaea;p__Iainarchaeota;c__Iainarchaeia;o__JAADDC01;f__JAADDC01;g__JAADDC01;s__
Aegir_M25_B209	3	93.29	2.148	94.45	0.25	0.557	10864	2789149	0.0191051	0.0104458	0	0.00350939	0	0.00433325	0.318258	0.00445595	0	Bacteria	Pseudomonadota	Gammaproteobacteria	Chromatiales	Sedimenticolaceae	Thiolapillus		d__Bacteria;p__Pseudomonadota;c__Gammaproteobacteria;o__Chromatiales;f__Sedimenticolaceae;g__Thiolapillus;s__
Aegir_M25_B21	2	62.34	6.765	58.79	2.86	0.537	9183	1138830	0	0.115717	0.205875	0.00170035	0	0	0.132408	0	0	Archaea	Methanobacteriota_B	Thermococci	Thermococcales	Thermococcaceae	Thermococcus		d__Archaea;p__Methanobacteriota_B;c__Thermococci;o__Thermococcales;f__Thermococcaceae;g__Thermococcus;s__
Aegir_M25_B210	0	60.29	0	63.42	0.19	0.419	22921	1226057	0	0.0276891	0	0	0	0	0	0	0	Archaea	Thermoproteota	Thermoprotei	Thermofilales	Thermofilaceae			d__Archaea;p__Thermoproteota;c__Thermoprotei;o__Thermofilales;f__Thermofilaceae;g__;s__
Aegir_M25_B211	0	81.78	1.401	79.73	0.16	0.493	39620	974333	0.00166558	0.0774842	0.00115216	0.00117525	0	0	0	0	0	Archaea	Thermoproteota	JANJXX01	JAMOTR01	JAMOTR01	JAMOTR01		d__Archaea;p__Thermoproteota;c__JANJXX01;o__JAMOTR01;f__JAMOTR01;g__JAMOTR01;s__
Aegir_M25_B212	2	98.78	2.439	99.99	1.26	0.473	33361	1839884	0	0.0494103	0.00594326	0	0	0	0.0131377	0	0	Bacteria	Campylobacterota	Campylobacteria	Campylobacterales	Hydrogenimonadaceae	Hydrogenimonas		d__Bacteria;p__Campylobacterota;c__Campylobacteria;o__Campylobacterales;f__Hydrogenimonadaceae;g__Hydrogenimonas;s__
Aegir_M25_B213	4	87.99	1.244	83.65	1.48	0.652	15485	2325914	0.170547	1.99935	0.00147936	0.0219769	0	0	0	0	0	Bacteria	Pseudomonadota	Gammaproteobacteria	UBA6429	UBA6429	JALSSV01		d__Bacteria;p__Pseudomonadota;c__Gammaproteobacteria;o__UBA6429;f__UBA6429;g__JALSSV01;s__
Aegir_M25_B214	2	53.86	7.147	52.71	4.84	0.418	3360	844344	0.116708	0.0143103	0	0.225614	0.00975298	0	0.0408104	0	0	Bacteria	Pseudomonadota	Gammaproteobacteria	Thiotrichales	Thiotrichaceae	HyVt-477		d__Bacteria;p__Pseudomonadota;c__Gammaproteobacteria;o__Thiotrichales;f__Thiotrichaceae;g__HyVt-477;s__
Aegir_M25_B215	3	94.54	2.909	93.19	4.68	0.548	10469	5440894	0.0489563	0.217346	0	0.0281482	0	0.000693377	0.0641265	0	0	Bacteria	Chloroflexota	Anaerolineae	Promineifilales	Promineifilaceae	JAJRTP01		d__Bacteria;p__Chloroflexota;c__Anaerolineae;o__Promineifilales;f__Promineifilaceae;g__JAJRTP01;s__
Aegir_M25_B216	5	88.33	0.344	88.25	0	0.589	82018	1721252	0	0.0372027	0.00193887	0	0	0	0	0	0.0131726	Bacteria	Pseudomonadota	Gammaproteobacteria	Methylococcales	Methylothermaceae			d__Bacteria;p__Pseudomonadota;c__Gammaproteobacteria;o__Methylococcales;f__Methylothermaceae;g__;s__
Aegir_M25_B217	0	85.35	2.254	78.99	2.47	0.643	6492	3001236	0.00755489	0.0210047	0	0.00576137	0	0.00178695	0.0100814	0	0.00265108	Bacteria	Pseudomonadota	Alphaproteobacteria	Rhodobacterales	Rhodobacteraceae			d__Bacteria;p__Pseudomonadota;c__Alphaproteobacteria;o__Rhodobacterales;f__Rhodobacteraceae;g__;s__
Aegir_M25_B218	1	98.1	1.265	99.96	0.71	0.444	72743	1854897	0	0.155229	0	0	0	0	0	0	0	Archaea	Thermoproteota	Thermoprotei_A	Sulfolobales	Pyrodictiaceae			d__Archaea;p__Thermoproteota;c__Thermoprotei_A;o__Sulfolobales;f__Pyrodictiaceae;g__;s__
Aegir_M25_B219	0	72.93	1.123	93.98	0.71	0.283	18663	859910	0	0.119669	0	0.00448193	0	0	0.00560817	0	0	Bacteria	Patescibacteria	Dojkabacteria	B142	JAFGMG01			d__Bacteria;p__Patescibacteria;c__Dojkabacteria;o__B142;f__JAFGMG01;g__;s__
Aegir_M25_B22	0	96.18	1.265	96.39	0.03	0.398	22871	1405542	0	0.0355576	0.257152	0	0	0	0.00608644	0	0	Bacteria	Aquificota	Desulfurobacteriia	Desulfurobacteriales	Desulfurobacteriaceae	Desulfurobacterium_B		d__Bacteria;p__Aquificota;c__Desulfurobacteriia;o__Desulfurobacteriales;f__Desulfurobacteriaceae;g__Desulfurobacterium_B;s__
Aegir_M25_B220	0	94.11	0	95.27	0.02	0.312	35027	2035226	0	0.0295691	0.135379	0	0	0	0.0141402	0	0.0054708	Bacteria	Bacteroidota	Bacteroidia	Flavobacteriales	JAADED01	JALSPZ01		d__Bacteria;p__Bacteroidota;c__Bacteroidia;o__Flavobacteriales;f__JAADED01;g__JALSPZ01;s__
Aegir_M25_B221	2	88.54	0.645	84.39	0.55	0.356	38573	1514728	0	0.0372704	0	0	0	0.00147338	0.0121246	0	0	Bacteria	Desulfobacterota	DSM-4660	Desulfatiglandales	JALVZP01			d__Bacteria;p__Desulfobacterota;c__DSM-4660;o__Desulfatiglandales;f__JALVZP01;g__;s__
Aegir_M25_B222	2	59.03	1.265	56.07	0.3	0.358	4396	1061765	0	0.0179552	0	0.00249581	0	0	0	0	0	Archaea	Thermoproteota	Thermoprotei_A	Sulfolobales	Desulfurococcaceae	WAML01		d__Archaea;p__Thermoproteota;c__Thermoprotei_A;o__Sulfolobales;f__Desulfurococcaceae;g__WAML01;s__
Aegir_M25_B223	0	98.69	0.653	95.94	0.22	0.371	24018	1622988	0	0.0268607	0	0.00147573	0	0.00779409	0.0675614	0	0	Archaea	Halobacteriota	Archaeoglobi	Archaeoglobales	Archaeoglobaceae	B5-G16		d__Archaea;p__Halobacteriota;c__Archaeoglobi;o__Archaeoglobales;f__Archaeoglobaceae;g__B5-G16;s__
Aegir_M25_B224	3	95.81	0.595	96.46	0.09	0.488	59409	2273453	0	0.0513106	0	0.00180086	0	0	0.00456011	0	0	Bacteria	Desulfobacterota	Dissulfuribacteria	Dissulfuribacterales	Dissulfuribacteraceae	Dissulfuribacter		d__Bacteria;p__Desulfobacterota;c__Dissulfuribacteria;o__Dissulfuribacterales;f__Dissulfuribacteraceae;g__Dissulfuribacter;s__
Aegir_M25_B225	5	95.03	1.056	93.24	0.05	0.493	32589	1906927	0	0.0778448	0.013728	0.00973904	0	0	0.0766927	0	0	Bacteria	Pseudomonadota	Gammaproteobacteria	Nitrosococcales	Methylophagaceae	GCA-002733105		d__Bacteria;p__Pseudomonadota;c__Gammaproteobacteria;o__Nitrosococcales;f__Methylophagaceae;g__GCA-002733105;s__
Aegir_M25_B226	1	93.01	1.612	88.2	1.35	0.717	39459	2647592	0.00933391	0.03319	0	0	0	0	0	0	0.0742764	Bacteria	Planctomycetota	UBA1135	UBA1135	UBA1135	JALUVI01		d__Bacteria;p__Planctomycetota;c__UBA1135;o__UBA1135;f__UBA1135;g__JALUVI01;s__
Aegir_M25_B227	0	65.51	0	75.16	0	0.474	55260	788287	0.00524144	0.0418198	0	0.00155356	0	0	0.00466672	0	0	Bacteria	Patescibacteria	Paceibacteria	Moranbacterales	GCA-2747515	JALVQA01		d__Bacteria;p__Patescibacteria;c__Paceibacteria;o__Moranbacterales;f__GCA-2747515;g__JALVQA01;s__
Aegir_M25_B228	1	88.5	1.742	81.81	0.44	0.627	8604	1337647	0	1.01714	0	0	0	0	0	0	0	Archaea	Thermoproteota	Thermoprotei_A	Sulfolobales	Acidilobaceae	JALSQL01		d__Archaea;p__Thermoproteota;c__Thermoprotei_A;o__Sulfolobales;f__Acidilobaceae;g__JALSQL01;s__
Aegir_M25_B229	3	97.73	1.098	99.95	0.79	0.445	41088	3996576	0.0022701	0.210765	0	0.00184528	0	0	0.0264553	0.00177644	0.00672215	Bacteria	Calditrichota	Calditrichia	Calditrichales	Calditrichaceae	Caldithrix		d__Bacteria;p__Calditrichota;c__Calditrichia;o__Calditrichales;f__Calditrichaceae;g__Caldithrix;s__
Aegir_M25_B23	0	82.72	5.454	86.35	3.76	0.622	20712	1952650	0.00440104	0.229027	0.0169694	0.00340643	0	0	0.0041425	0	0.00812527	Bacteria	Chloroflexota	Anaerolineae	Anaerolineales	DRMV01	DRMV01		d__Bacteria;p__Chloroflexota;c__Anaerolineae;o__Anaerolineales;f__DRMV01;g__DRMV01;s__
Aegir_M25_B230	1	90.35	1.052	96.31	0.01	0.497	20348	1528307	0	0.0771991	0.0128631	0.00118468	0	0	0	0	0	Bacteria	Thermotogota	Thermotogae	Thermotogales	Thermotogaceae			d__Bacteria;p__Thermotogota;c__Thermotogae;o__Thermotogales;f__Thermotogaceae;g__;s__
Aegir_M25_B231	3	97.8	1.646	99.44	0.26	0.475	26382	1935353	0.00427145	0.372284	0	0.00378854	0	0	0.00194324	0	0	Bacteria	Desulfobacterota	Thermodesulfobacteria	Thermodesulfobacteriales	Thermodesulfatatoraceae	Thermodesulfatator_A		d__Bacteria;p__Desulfobacterota;c__Thermodesulfobacteria;o__Thermodesulfobacteriales;f__Thermodesulfatatoraceae;g__Thermodesulfatator_A;s__
Aegir_M25_B232	3	97.73	1.098	100	0.01	0.452	33253	4520730	0	0.03628	0	0.00155337	0	0.000727882	0.0247302	0	0.00474489	Bacteria	Calditrichota	Calditrichia	Calditrichales	Calditrichaceae	Caldithrix		d__Bacteria;p__Calditrichota;c__Calditrichia;o__Calditrichales;f__Calditrichaceae;g__Caldithrix;s__
Aegir_M25_B233	0	93.38	1.869	98.41	1.93	0.531	48115	1715985	0	0.0445662	0	0	0	0	0.0010345	0	0	Archaea	Thermoproteota	Korarchaeia	Korarchaeales	Korarchaeaceae	WALU01	WALU01 sp027491395	d__Archaea;p__Thermoproteota;c__Korarchaeia;o__Korarchaeales;f__Korarchaeaceae;g__WALU01;s__WALU01 sp027491395
Aegir_M25_B234	0	69.45	1.923	69.79	1.38	0.325	6574	1241819	0	0.0513238	0.493652	0.00291897	0	0.00333649	0.0275927	0	0	Bacteria	Campylobacterota	Campylobacteria	Campylobacterales	JALSKU01	JALSKU01		d__Bacteria;p__Campylobacterota;c__Campylobacteria;o__Campylobacterales;f__JALSKU01;g__JALSKU01;s__
Aegir_M25_B235	0	75.08	0	68.08	0.24	0.479	4344	2071538	0.0543879	0.00651367	0	0.00478134	0	0	0.0887221	0	0	Bacteria	Bacteroidota	Bacteroidia	Chitinophagales	Saprospiraceae	JALSTN01		d__Bacteria;p__Bacteroidota;c__Bacteroidia;o__Chitinophagales;f__Saprospiraceae;g__JALSTN01;s__
Aegir_M25_B236	0	92.41	0.926	96.12	1.23	0.496	10720	1605477	0	0.0295263	0.00672516	0.00513319	0	0	0.00487111	0	0	Bacteria	Campylobacterota	Campylobacteria	Campylobacterales	Sulfurovaceae	Nitratifractor		d__Bacteria;p__Campylobacterota;c__Campylobacteria;o__Campylobacterales;f__Sulfurovaceae;g__Nitratifractor;s__
Aegir_M25_B237	2	70.68	0	75.19	1.46	0.445	6232	2167429	0.0134847	0.0218922	0	0	0.0487642	0.00346672	0.0013134	0.066517	0	Bacteria	Pseudomonadota	Gammaproteobacteria	SZUA-229	SZUA-229	GCA-2746365		d__Bacteria;p__Pseudomonadota;c__Gammaproteobacteria;o__SZUA-229;f__SZUA-229;g__GCA-2746365;s__
Aegir_M25_B238	2	97.63	1.893	95.7	1.73	0.546	59760	3127131	0.113373	0.0634025	0	0.00708052	0	0	0.0293398	0.00437644	0.0305613	Bacteria	Pseudomonadota	Gammaproteobacteria	UWMA-0217	UWMA-0217	JALSHZ01		d__Bacteria;p__Pseudomonadota;c__Gammaproteobacteria;o__UWMA-0217;f__UWMA-0217;g__JALSHZ01;s__
Aegir_M25_B239	7	96.21	2.521	90.92	1.25	0.725	106229	6091697	0	0.240856	0	0	0	0	0.0140146	0	0.0164971	Bacteria	Myxococcota	UBA796	UBA796	UBA2385	J125		d__Bacteria;p__Myxococcota;c__UBA796;o__UBA796;f__UBA2385;g__J125;s__
Aegir_M25_B24	9	93.64	2.787	94.95	0.17	0.411	23156	3165327	0.305546	0.0120682	0	0	0.224604	0.00574186	0.102105	0.00754676	0	Bacteria	Pseudomonadota	Gammaproteobacteria	Methylococcales	Methylomonadaceae	QPIN01		d__Bacteria;p__Pseudomonadota;c__Gammaproteobacteria;o__Methylococcales;f__Methylomonadaceae;g__QPIN01;s__
Aegir_M25_B240	0	86.91	2.803	90.72	0.87	0.304	68160	933000	0	0.206714	0	0	0	0	0	0	0.0265873	Archaea	Micrarchaeota	Micrarchaeia	Anstonellales	J096	WAKO01		d__Archaea;p__Micrarchaeota;c__Micrarchaeia;o__Anstonellales;f__J096;g__WAKO01;s__
Aegir_M25_B241	3	70.84	6.828	63.54	6.54	0.321	8706	2181847	0.0383196	0.0200255	0	0.0636272	0.163132	0.0104462	0.33862	0.0272295	0	Bacteria	Bacteroidota	Bacteroidia	Flavobacteriales	Flavobacteriaceae	Lutimonas		d__Bacteria;p__Bacteroidota;c__Bacteroidia;o__Flavobacteriales;f__Flavobacteriaceae;g__Lutimonas;s__
Aegir_M25_B242	1	87.18	1.006	80.97	0.3	0.29	19153	2000592	0.0301902	0.111759	0.0146395	0.0178441	0	0.00180706	0.146835	0	0.00482337	Bacteria	Bacteroidota	Bacteroidia	Flavobacteriales	Flavobacteriaceae	S010-17		d__Bacteria;p__Bacteroidota;c__Bacteroidia;o__Flavobacteriales;f__Flavobacteriaceae;g__S010-17;s__
Aegir_M25_B243	0	59.73	0.934	63.68	0.43	0.34	8144	593213	0	0.0209476	0	0	0	0	0	0	0	Archaea	Micrarchaeota	Micrarchaeia	CAILAH01	CAILAH01			d__Archaea;p__Micrarchaeota;c__Micrarchaeia;o__CAILAH01;f__CAILAH01;g__;s__
Aegir_M25_B244	0	90.75	1.68	91.84	0.34	0.287	11248	1907069	0	0.0374165	0.00149969	0.00140524	0	0	0.00826769	0	0	Bacteria	DYJV01	DYJV01	DYJV01	DYJV01			d__Bacteria;p__DYJV01;c__DYJV01;o__DYJV01;f__DYJV01;g__;s__
Aegir_M25_B245	3	98.57	0.203	99.99	1.35	0.301	39344	1921377	0.00157395	2.15945	0.00954023	0.00163811	0	0	0.0113148	0	1.18208	Bacteria	Aquificota	Aquificae	Hydrogenothermales	Hydrogenothermaceae	JALSSE01		d__Bacteria;p__Aquificota;c__Aquificae;o__Hydrogenothermales;f__Hydrogenothermaceae;g__JALSSE01;s__
Aegir_M25_B246	0	75.67	0.735	61.52	0	0.473	4852	964918	0	0.0181191	0	0	0	0	0	0	0	Archaea	Thermoproteota	Thermoprotei	Thermoproteales	Thermocladiaceae			d__Archaea;p__Thermoproteota;c__Thermoprotei;o__Thermoproteales;f__Thermocladiaceae;g__;s__
Aegir_M25_B247	8	91.57	0	87.23	1	0.457	9731	2052622	0	0.0237393	0	0.00450114	0	0.0200572	0.00250912	0	0	Bacteria	Desulfobacterota	Dissulfuribacteria	Dissulfuribacterales	QOAL01			d__Bacteria;p__Desulfobacterota;c__Dissulfuribacteria;o__Dissulfuribacterales;f__QOAL01;g__;s__
Aegir_M25_B248	0	98.73	0.949	96.36	0.5	0.394	139363	1507337	0	0.0823661	0	0	0	0	0	0	0	Archaea	Thermoproteota	Thermoprotei_A	Sulfolobales	Acidilobaceae	S143-63		d__Archaea;p__Thermoproteota;c__Thermoprotei_A;o__Sulfolobales;f__Acidilobaceae;g__S143-63;s__
Aegir_M25_B249	1	100	0.27	99.99	0.37	0.41	149133	4589272	0	0.0684485	0	0	0	0	0	0	0	Bacteria	Bacteroidota	Bacteroidia	Flavobacteriales	Crocinitomicaceae	UBA4466	UBA4466 sp013373595	d__Bacteria;p__Bacteroidota;c__Bacteroidia;o__Flavobacteriales;f__Crocinitomicaceae;g__UBA4466;s__UBA4466 sp013373595
Aegir_M25_B25	2	99.59	0.406	100	0	0.529	81887	1844129	0	0.0768981	0	0.00176584	0	0	0.0105845	0	0	Bacteria	Campylobacterota	Campylobacteria	Campylobacterales	Sulfurimonadaceae	JACXUG01		d__Bacteria;p__Campylobacterota;c__Campylobacteria;o__Campylobacterales;f__Sulfurimonadaceae;g__JACXUG01;s__
Aegir_M25_B250	0	73.07	1.401	66.92	0.09	0.605	41400	921332	0	0.0303779	0	0	0	0	0	0	0	Archaea	Thermoproteota	JANJXX01	JAMOTR01	JAMOTR01	JAMOTR01		d__Archaea;p__Thermoproteota;c__JANJXX01;o__JAMOTR01;f__JAMOTR01;g__JAMOTR01;s__
Aegir_M25_B251	1	98.1	0.949	99.14	0.79	0.48	38021	1632259	0	0.925196	0	0	0	0	0	0	0	Archaea	Thermoproteota	Thermoprotei_A	Sulfolobales	Pyrodictiaceae	WAQM01		d__Archaea;p__Thermoproteota;c__Thermoprotei_A;o__Sulfolobales;f__Pyrodictiaceae;g__WAQM01;s__
Aegir_M25_B252	3	77.99	2.164	81.41	2.9	0.482	7149	2279169	0	0.0233813	0	0	0	0	0	0	0	Bacteria	Pseudomonadota	Gammaproteobacteria	Chromatiales	Chromatiaceae	Achromatium		d__Bacteria;p__Pseudomonadota;c__Gammaproteobacteria;o__Chromatiales;f__Chromatiaceae;g__Achromatium;s__
Aegir_M25_B253	0	88.18	0	97.09	0.05	0.55	28200	2115211	0.00304366	0.10745	0	0.00547347	0	0	0.0153287	0	0	Bacteria	Chloroflexota	Anaerolineae	Anaerolineales	Villigracilaceae	S143-42		d__Bacteria;p__Chloroflexota;c__Anaerolineae;o__Anaerolineales;f__Villigracilaceae;g__S143-42;s__
Aegir_M25_B254	3	95.45	4.09	96.52	1.43	0.62	13495	5191550	0.0247526	0.0168775	0	0	0	0	0.0198189	0	0	Bacteria	Chloroflexota	Anaerolineae	Caldilineales	Caldilineaceae	JAJRVT01		d__Bacteria;p__Chloroflexota;c__Anaerolineae;o__Caldilineales;f__Caldilineaceae;g__JAJRVT01;s__
Aegir_M25_B255	8	95.48	0.645	96.98	3.23	0.664	84791	5850107	0.00164414	0.0217739	0	0.232308	0	0	0.00968123	0	0	Bacteria	Myxococcota	UBA796	UBA796	CAJQPC01	CAJQPC01		d__Bacteria;p__Myxococcota;c__UBA796;o__UBA796;f__CAJQPC01;g__CAJQPC01;s__
Aegir_M25_B26	2	91.81	1.818	98.02	2.17	0.592	11796	2802087	0.00463457	0.0244352	0	0.0256679	0	0.00345655	0.0207939	0	0	Bacteria	Chloroflexota	Anaerolineae	Anaerolineales	UBA11858	UBA11858		d__Bacteria;p__Chloroflexota;c__Anaerolineae;o__Anaerolineales;f__UBA11858;g__UBA11858;s__
Aegir_M25_B27	1	50.14	1.422	52.37	0.46	0.368	6443	1136884	0	0.0213835	0	0	0	0	0	0	0	Bacteria	JALSQH01	JALSQH01	JALSQH01	JALSQH01	JALSQH01		d__Bacteria;p__JALSQH01;c__JALSQH01;o__JALSQH01;f__JALSQH01;g__JALSQH01;s__
Aegir_M25_B28	0	75.46	0	94.3	0.04	0.227	13006	807537	0	0.0246282	0	0	0	0	0	0	0	Archaea	Nanoarchaeota	Nanoarchaeia	Woesearchaeales	UBA525			d__Archaea;p__Nanoarchaeota;c__Nanoarchaeia;o__Woesearchaeales;f__UBA525;g__;s__
Aegir_M25_B29	1	84.36	2.352	86.55	4.07	0.475	11134	2986179	0.00417867	0.113886	0	0.0206818	0	0	0.0162881	0	0	Bacteria	Spirochaetota	Leptospirae	Leptospirales	Leptonemataceae	JAGRNA01		d__Bacteria;p__Spirochaetota;c__Leptospirae;o__Leptospirales;f__Leptonemataceae;g__JAGRNA01;s__
Aegir_M25_B3	0	93.03	6.37	94.34	7.35	0.342	15460	2008744	0.0163307	0.0375297	0.00449841	3.28573	0.0207704	0.028356	0.00988964	0.013886	0	Bacteria	Campylobacterota	Campylobacteria	Campylobacterales	Sulfurovaceae	UBA1140		d__Bacteria;p__Campylobacterota;c__Campylobacteria;o__Campylobacterales;f__Sulfurovaceae;g__UBA1140;s__
Aegir_M25_B30	0	80.9	0	86.12	0.89	0.653	21499	3357217	0	0.0230328	0	0.0324623	0	0.002549	0.0180164	0	0	Bacteria	Chloroflexota	Anaerolineae	B4-G1	DUEL01	SZUA-1492		d__Bacteria;p__Chloroflexota;c__Anaerolineae;o__B4-G1;f__DUEL01;g__SZUA-1492;s__
Aegir_M25_B31	0	53.79	0	52.86	0.16	0.618	19280	1011628	0.00184604	0.0469119	0.0693315	0	0	0	0	0	0	Archaea	Thermoproteota	Thermoprotei_A	Sulfolobales	Acidilobaceae	S143-63		d__Archaea;p__Thermoproteota;c__Thermoprotei_A;o__Sulfolobales;f__Acidilobaceae;g__S143-63;s__
Aegir_M25_B32	1	97.02	0.54	94.65	0.08	0.29	41430	2847135	0.00472049	0.0245178	0	0.450336	0	0.00164349	0.084607	0	0	Bacteria	Bacteroidota	Bacteroidia	Flavobacteriales	Crocinitomicaceae	Putridiphycobacter		d__Bacteria;p__Bacteroidota;c__Bacteroidia;o__Flavobacteriales;f__Crocinitomicaceae;g__Putridiphycobacter;s__
Aegir_M25_B33	1	84.17	0	87.16	0.54	0.529	83967	1321992	0	0.0347239	0	0	0	0	0	0	0	Archaea	Thermoproteota	Thermoprotei_A	Sulfolobales	Desulfurococcaceae	JALVHX01		d__Archaea;p__Thermoproteota;c__Thermoprotei_A;o__Sulfolobales;f__Desulfurococcaceae;g__JALVHX01;s__
Aegir_M25_B34	3	87.57	2.101	86.64	1.77	0.499	9472	3753351	0.005181	0.00905016	0	0.021204	0.0363849	0	0.0268913	0	0	Bacteria	Chloroflexota	Anaerolineae	Promineifilales	Promineifilaceae	S016-13		d__Bacteria;p__Chloroflexota;c__Anaerolineae;o__Promineifilales;f__Promineifilaceae;g__S016-13;s__
Aegir_M25_B35	4	84.18	1.929	85.02	2.88	0.61	9809	2061928	0.00221028	1.01957	0.00351248	0.00259756	0	0	0.00534471	0	0.900271	Bacteria	Pseudomonadota	Gammaproteobacteria	Methylococcales	Methylothermaceae	Methylohalobius		d__Bacteria;p__Pseudomonadota;c__Gammaproteobacteria;o__Methylococcales;f__Methylothermaceae;g__Methylohalobius;s__
Aegir_M25_B36	1	91.81	1.09	97.9	0.93	0.611	29667	3455104	0	0.30578	0	0	0	0	0.00564256	0	0.00934941	Bacteria	Chloroflexota	Anaerolineae	J102	J102	M2005		d__Bacteria;p__Chloroflexota;c__Anaerolineae;o__J102;f__J102;g__M2005;s__
Aegir_M25_B37	1	90.9	0.909	94.21	1.98	0.605	36398	4023248	0.00252109	0.0723022	0	0.00886067	0	0	0.0283215	0	0	Bacteria	Chloroflexota	Anaerolineae	Aggregatilineales	Ch27	JALSTC01	JALSTC01 sp026983935	d__Bacteria;p__Chloroflexota;c__Anaerolineae;o__Aggregatilineales;f__Ch27;g__JALSTC01;s__JALSTC01 sp026983935
Aegir_M25_B38	6	96.45	0.668	96.2	0.98	0.456	109926	2483537	0	0.0543109	0	0.00317639	0	0	0.0534069	0.00236266	0	Bacteria	Desulfobacterota	DSM-4660	Desulfatiglandales	JAGGTJ01	JAGGTJ01		d__Bacteria;p__Desulfobacterota;c__DSM-4660;o__Desulfatiglandales;f__JAGGTJ01;g__JAGGTJ01;s__
Aegir_M25_B39	0	74.38	8.62	68.07	5.02	0.356	14235	1544897	0.148963	0.0333863	0	0.391848	0.295175	0.00497899	0.0319074	0.00939171	0	Bacteria	Campylobacterota	Campylobacteria	Campylobacterales	Sulfurovaceae	Sulfurovum		d__Bacteria;p__Campylobacterota;c__Campylobacteria;o__Campylobacterales;f__Sulfurovaceae;g__Sulfurovum;s__
Aegir_M25_B4	1	79.66	0.308	87.02	1.38	0.658	8574	1183780	0	0.0559211	0	0.00207243	0	0.00556769	0.0287306	0	0	Bacteria	Bipolaricaulota	Bipolaricaulia	Bipolaricaulales	Bipolaricaulaceae			d__Bacteria;p__Bipolaricaulota;c__Bipolaricaulia;o__Bipolaricaulales;f__Bipolaricaulaceae;g__;s__
Aegir_M25_B40	3	57.89	3.508	64.7	4.28	0.301	11024	1750371	0.0133096	0.0300989	0	0	0.314082	0.00882391	0.0427016	0.156264	0	Bacteria	Bacteroidota	Bacteroidia	Flavobacteriales	Flavobacteriaceae	Lutimonas		d__Bacteria;p__Bacteroidota;c__Bacteroidia;o__Flavobacteriales;f__Flavobacteriaceae;g__Lutimonas;s__
Aegir_M25_B41	0	71.89	2.695	70.06	0.95	0.292	8560	1632982	0.00313059	0.0183332	0	0.0109492	0.0049994	0.00221983	0.0337079	0.00352189	0	Bacteria	Bacteroidota	Bacteroidia	Flavobacteriales	Flavobacteriaceae	S010-17		d__Bacteria;p__Bacteroidota;c__Bacteroidia;o__Flavobacteriales;f__Flavobacteriaceae;g__S010-17;s__
Aegir_M25_B42	0	94.93	0	99.89	1.12	0.439	202676	1951908	0	0.0856701	0	0	0	0	0	0	0	Archaea	Thermoproteota	Thermoprotei_A	Sulfolobales	Desulfurococcaceae	WAML01		d__Archaea;p__Thermoproteota;c__Thermoprotei_A;o__Sulfolobales;f__Desulfurococcaceae;g__WAML01;s__
Aegir_M25_B43	0	95.96	2.419	89.86	2	0.43	13155	1296332	0	0.0268085	0	0	0	0	0	0	0	Archaea	Thermoplasmatota	Thermoplasmata	Aciduliprofundales	Aciduliprofundaceae	S014-50		d__Archaea;p__Thermoplasmatota;c__Thermoplasmata;o__Aciduliprofundales;f__Aciduliprofundaceae;g__S014-50;s__
Aegir_M25_B44	0	57.79	0	57.76	1.62	0.376	4475	1046123	0	0.0178033	0	0	0	0	0	0	0	Archaea	Thermoproteota	JANJXX01	Panguiarchaeales	Panguiarchaeaceae			d__Archaea;p__Thermoproteota;c__JANJXX01;o__Panguiarchaeales;f__Panguiarchaeaceae;g__;s__
Aegir_M25_B45	0	72.78	0	64.84	1.68	0.503	9326	2395635	0	0.066533	0	0.00585317	0	0	0.00253934	0	0	Bacteria	Spirochaetota	Leptospirae	Leptospirales	Leptonemataceae	JAGRNA01		d__Bacteria;p__Spirochaetota;c__Leptospirae;o__Leptospirales;f__Leptonemataceae;g__JAGRNA01;s__
Aegir_M25_B46	3	98.78	2.873	91.82	1.62	0.581	67081	4758280	0.00830262	0.0372273	0	0.0028178	0	0	0.00372493	0	0.00592891	Bacteria	Planctomycetota	Planctomycetia	Pirellulales	Pirellulaceae	Mariniblastus		d__Bacteria;p__Planctomycetota;c__Planctomycetia;o__Pirellulales;f__Pirellulaceae;g__Mariniblastus;s__
Aegir_M25_B47	1	98.38	2.15	91.17	0.07	0.667	22985	3216521	0.00617932	0.0298107	0	0.00169184	0	0	0.0139025	0	0	Bacteria	Planctomycetota	SZUA-567	SZUA-567	SZUA-567			d__Bacteria;p__Planctomycetota;c__SZUA-567;o__SZUA-567;f__SZUA-567;g__;s__
Aegir_M25_B48	1	93.09	8.602	97.54	6.19	0.344	12448	2785956	0	0.0387688	0.0662756	0.0142148	0	0	0.0646938	0	0	Bacteria	Bacteroidota	Bacteroidia	Bacteroidales	S143-33	S143-33		d__Bacteria;p__Bacteroidota;c__Bacteroidia;o__Bacteroidales;f__S143-33;g__S143-33;s__
Aegir_M25_B49	0	90.22	0	96.63	0	0.306	120180	2780387	0.0264016	0.438277	0	0.0067398	0	0.0028323	0	0	0	Bacteria	Bacteroidota	Bacteroidia	Chitinophagales	Saprospiraceae	JADJGA01		d__Bacteria;p__Bacteroidota;c__Bacteroidia;o__Chitinophagales;f__Saprospiraceae;g__JADJGA01;s__
Aegir_M25_B5	2	92.99	0	97.9	0.15	0.64	96614	3092651	0	0.0799653	0	0	0	0	0	0	0.0219508	Bacteria	J088	J088	J088	J088	J088		d__Bacteria;p__J088;c__J088;o__J088;f__J088;g__J088;s__
Aegir_M25_B50	4	94.71	0.522	99.71	0.01	0.636	45727	2567516	0	0.326844	0.00206009	0	0	0	0	0	1.64881	Bacteria	Pseudomonadota	Gammaproteobacteria	Chromatiales	Sedimenticolaceae	MONJU		d__Bacteria;p__Pseudomonadota;c__Gammaproteobacteria;o__Chromatiales;f__Sedimenticolaceae;g__MONJU;s__
Aegir_M25_B51	1	93.4	0	100	1.21	0.642	46686	2067433	0	0.0354015	0	0	0	0	0	0	0	Bacteria	WOR-3	Hydrothermia	WGAB01	WGAB01	WGAB01		d__Bacteria;p__WOR-3;c__Hydrothermia;o__WGAB01;f__WGAB01;g__WGAB01;s__
Aegir_M25_B52	0	91.96	3.114	86.69	3.06	0.561	6212	1588596	0	0.0306074	0.00580836	0.00235456	0	0.00108306	0.00148019	0	0	Bacteria	Campylobacterota	Campylobacteria	Campylobacterales	Sulfurovaceae	Nitratifractor		d__Bacteria;p__Campylobacterota;c__Campylobacteria;o__Campylobacterales;f__Sulfurovaceae;g__Nitratifractor;s__
Aegir_M25_B53	0	96.59	2.553	99.72	0.16	0.69	199141	2202540	0.0059141	0.355713	0.00744611	0.0035854	0	0	0.00228497	0	0	Bacteria	Deinococcota	Deinococci	Deinococcales	Marinithermaceae	Oceanithermus	Oceanithermus sp026981865	d__Bacteria;p__Deinococcota;c__Deinococci;o__Deinococcales;f__Marinithermaceae;g__Oceanithermus;s__Oceanithermus sp026981865
Aegir_M25_B54	4	68.62	1.239	63.07	0.35	0.624	4123	3034024	0.0272778	0.0110499	0	0.00212006	0	0	0.0153116	0	0.0111128	Bacteria	Planctomycetota	GCA-002687715	GCA-002687715	DRQF01	DRQF01		d__Bacteria;p__Planctomycetota;c__GCA-002687715;o__GCA-002687715;f__DRQF01;g__DRQF01;s__
Aegir_M25_B55	3	92.74	1.194	97.34	1.25	0.728	101877	2867816	0.0236547	0.211134	0	0	0	0	0	0	0.00603708	Bacteria	Pseudomonadota	Gammaproteobacteria	S144-34	S144-34	S144-34	S144-34 sp026989495	d__Bacteria;p__Pseudomonadota;c__Gammaproteobacteria;o__S144-34;f__S144-34;g__S144-34;s__S144-34 sp026989495
Aegir_M25_B56	7	98.83	0	98.01	0.01	0.443	71215	3498609	0.0115223	0.570278	0.000949198	0.00255715	0	0	0.00684248	0	0.158199	Bacteria	Calditrichota	Calditrichia	RBG-13-44-9	J042	WGBF01		d__Bacteria;p__Calditrichota;c__Calditrichia;o__RBG-13-44-9;f__J042;g__WGBF01;s__
Aegir_M25_B57	1	62.19	1.864	63.84	2.05	0.428	4453	777720	0.00351203	0.211517	6.13154	0.00457715	0	0.000739237	0.0222689	0	0	Bacteria	Aquificota	Aquificae	Aquificales	QOAS01	QOAS01		d__Bacteria;p__Aquificota;c__Aquificae;o__Aquificales;f__QOAS01;g__QOAS01;s__
Aegir_M25_B58	3	87.36	1.466	94.71	1.39	0.644	19244	2756688	0.0394521	0.0463813	0	0	0	0	0.0239537	0	0.0777207	Bacteria	Pseudomonadota	Alphaproteobacteria	Rhodobacterales	Rhodobacteraceae	JAAEUB01		d__Bacteria;p__Pseudomonadota;c__Alphaproteobacteria;o__Rhodobacterales;f__Rhodobacteraceae;g__JAAEUB01;s__
Aegir_M25_B59	0	90.5	0.632	90.89	0.03	0.48	58884	1179666	0	0.110268	0.0332121	0	0	0	0	0	0	Archaea	Thermoproteota	Thermoprotei_A	Sulfolobales	Acidilobaceae			d__Archaea;p__Thermoproteota;c__Thermoprotei_A;o__Sulfolobales;f__Acidilobaceae;g__;s__
Aegir_M25_B6	2	71.39	2.642	66.11	1.11	0.264	11123	1044334	0	0.0375644	1.08134	0	0	0	0.00911671	0	0.00995235	Bacteria	Campylobacterota	Campylobacteria	Nautiliales	Nautiliaceae	Caminibacter		d__Bacteria;p__Campylobacterota;c__Campylobacteria;o__Nautiliales;f__Nautiliaceae;g__Caminibacter;s__
Aegir_M25_B60	0	94.18	0	95.13	0.45	0.472	45796	1890011	0	0.429083	0	0.00889389	0	0.0116669	0.00602281	0	0	Bacteria	WOR-3	Hydrothermia	B15-G9	B15-G9	B15-G9		d__Bacteria;p__WOR-3;c__Hydrothermia;o__B15-G9;f__B15-G9;g__B15-G9;s__
Aegir_M25_B61	0	51.99	4.31	50.47	1.96	0.272	12860	869814	0	0.0313049	0	0.0670304	0	0.00291961	0.0380054	0	0	Bacteria	Patescibacteria	Dojkabacteria	GCA-002793355	GCA-002793355			d__Bacteria;p__Patescibacteria;c__Dojkabacteria;o__GCA-002793355;f__GCA-002793355;g__;s__
Aegir_M25_B62	1	80.48	6.91	81.76	1.95	0.404	22008	1639903	0	0.0300054	0	0	0	0	0	0	0	Bacteria	JALSQH01	JALSQH01	JALSQH01	JALSQH01	JALSQH01		d__Bacteria;p__JALSQH01;c__JALSQH01;o__JALSQH01;f__JALSQH01;g__JALSQH01;s__
Aegir_M25_B63	1	88.12	1.635	91.31	0.06	0.578	19669	1412811	0	1.37376	0.019186	0.00320264	0	0	0	0	0	Archaea	Thermoproteota	Thermoprotei_A	Sulfolobales	Pyrodictiaceae	Pyrolobus		d__Archaea;p__Thermoproteota;c__Thermoprotei_A;o__Sulfolobales;f__Pyrodictiaceae;g__Pyrolobus;s__
Aegir_M25_B64	2	95.32	3.252	99.66	0.37	0.382	19212	1615485	0	0.180224	0.0170846	0.00563795	0	0	0.0402192	0	0.0248057	Bacteria	Aquificota	Aquificae	Hydrogenothermales	Hydrogenothermaceae	Persephonella		d__Bacteria;p__Aquificota;c__Aquificae;o__Hydrogenothermales;f__Hydrogenothermaceae;g__Persephonella;s__
Aegir_M25_B65	4	73.3	3.873	74.14	3.83	0.387	8109	2628886	0.170688	0.0358945	0	0.112194	0.0466713	0.039796	0.105753	0.0554812	0	Bacteria	Pseudomonadota	Gammaproteobacteria	Methylococcales	Methylomonadaceae	QPIN01	QPIN01 sp026988195	d__Bacteria;p__Pseudomonadota;c__Gammaproteobacteria;o__Methylococcales;f__Methylomonadaceae;g__QPIN01;s__QPIN01 sp026988195
Aegir_M25_B66	1	87.25	2.276	89.21	2.16	0.475	12185	1305377	0	0.0998606	0.0151315	0	0	0	0.0171012	0	0	Bacteria	Thermosulfidibacterota	Thermosulfidibacteria	Thermosulfidibacterales	Thermosulfidibacteraceae	Thermosulfidibacter		d__Bacteria;p__Thermosulfidibacterota;c__Thermosulfidibacteria;o__Thermosulfidibacterales;f__Thermosulfidibacteraceae;g__Thermosulfidibacter;s__
Aegir_M25_B67	1	59.44	3.424	61.96	3.15	0.576	3364	2033625	0	0.00993326	0	0.0309302	0	0	0.0241804	0	0	Bacteria	Chloroflexota	Anaerolineae	Aggregatilineales	JALXEW01	JALXEW01		d__Bacteria;p__Chloroflexota;c__Anaerolineae;o__Aggregatilineales;f__JALXEW01;g__JALXEW01;s__
Aegir_M25_B68	0	87.79	1.232	80.86	2.28	0.722	10400	2280478	0	0.0257985	0	0	0	0	0	0	0	Bacteria	Pseudomonadota	Gammaproteobacteria	DSM-100275	DSM-100275	Inmirania		d__Bacteria;p__Pseudomonadota;c__Gammaproteobacteria;o__DSM-100275;f__DSM-100275;g__Inmirania;s__
Aegir_M25_B69	2	59.07	5.274	63.11	5.23	0.436	103651	1385859	0	0.0452054	0.000650285	0	0	0	0	0	0	Archaea	Thermoproteota	Thermoprotei_A	Sulfolobales	Desulfurococcaceae	WAON01		d__Archaea;p__Thermoproteota;c__Thermoprotei_A;o__Sulfolobales;f__Desulfurococcaceae;g__WAON01;s__
Aegir_M25_B7	2	98.1	1.265	99.92	2.26	0.418	64457	1866475	0	0.118627	0	0	0	0	0	0	0	Archaea	Thermoproteota	Thermoprotei_A	Sulfolobales	Desulfurococcaceae	EX4484-58		d__Archaea;p__Thermoproteota;c__Thermoprotei_A;o__Sulfolobales;f__Desulfurococcaceae;g__EX4484-58;s__
Aegir_M25_B70	2	98.48	2.227	100	0.17	0.531	56542	4341435	0.0632914	0.0200085	0	0	0	0	0	0	0.0624073	Bacteria	Bacteroidota	Bacteroidia	Chitinophagales	Saprospiraceae	UBA6168		d__Bacteria;p__Bacteroidota;c__Bacteroidia;o__Chitinophagales;f__Saprospiraceae;g__UBA6168;s__
Aegir_M25_B71	0	98.82	1.176	92.32	1.37	0.3	22008	2746300	0	0.026485	0	0.00159372	0	0	0.00376904	0	0.00154141	Bacteria	Spirochaetota	Leptospirae	Leptospirales	Leptonemataceae	SKYB61		d__Bacteria;p__Spirochaetota;c__Leptospirae;o__Leptospirales;f__Leptonemataceae;g__SKYB61;s__
Aegir_M25_B72	0	52.65	2.875	62.62	1.68	0.547	7867	438704	0	0.0153041	0.0483217	0	0	0	0.00170521	0	0	Archaea	Iainarchaeota	Iainarchaeia	JAADDC01	JAADDC01	SZUA-1452		d__Archaea;p__Iainarchaeota;c__Iainarchaeia;o__JAADDC01;f__JAADDC01;g__SZUA-1452;s__
Aegir_M25_B73	3	92.6	1.058	94.85	0.1	0.36	10526	2295493	0	0.0676038	0.00123023	0.00688484	0	0	0.0058907	0	0	Bacteria	Desulfobacterota	Desulfovibrionia	Desulfovibrionales	Desulfohalobiaceae	Desulfothermus		d__Bacteria;p__Desulfobacterota;c__Desulfovibrionia;o__Desulfovibrionales;f__Desulfohalobiaceae;g__Desulfothermus;s__
Aegir_M25_B74	2	64.78	8.62	72.08	13.8	0.378	6857	1602621	0.180946	0.0627217	0.0101491	0.294749	0.0891697	0.0152245	0.156327	0.00640113	0	Bacteria	Campylobacterota	Campylobacteria	Campylobacterales	Sulfurovaceae	Sulfurovum		d__Bacteria;p__Campylobacterota;c__Campylobacteria;o__Campylobacterales;f__Sulfurovaceae;g__Sulfurovum;s__
Aegir_M25_B75	0	68.22	0.84	68.64	1.88	0.434	4238	1990627	0	0.0175546	0	0.00110009	0	0	0.0084045	0	0	Bacteria	Myxococcota	SURF-8	SURF-8				d__Bacteria;p__Myxococcota;c__SURF-8;o__SURF-8;f__;g__;s__
Aegir_M25_B76	1	98.77	1.434	100	1	0.297	37781	1534070	0	0.0410984	0.017296	0.0238749	0	0.00376966	0.0285516	0	0.00338067	Bacteria	Campylobacterota	Campylobacteria	Campylobacterales	Sulfurovaceae	JAADEQ01		d__Bacteria;p__Campylobacterota;c__Campylobacteria;o__Campylobacterales;f__Sulfurovaceae;g__JAADEQ01;s__
Aegir_M25_B77	2	96.34	0.203	90.61	1.73	0.279	38791	2006766	0	0.0497652	0	0.0125412	0	0.00556752	0.0217546	0	0	Bacteria	Campylobacterota	Campylobacteria	Campylobacterales	Arcobacteraceae	CAIJNA01		d__Bacteria;p__Campylobacterota;c__Campylobacteria;o__Campylobacterales;f__Arcobacteraceae;g__CAIJNA01;s__
Aegir_M25_B78	6	89.45	2.564	95.63	1.44	0.734	68156	2861658	0.00303297	0.425988	0	0.0161427	0	0	0.0349241	0	0	Bacteria	Acidobacteriota	Polarisedimenticolia	J045	J045	JAMOQA01		d__Bacteria;p__Acidobacteriota;c__Polarisedimenticolia;o__J045;f__J045;g__JAMOQA01;s__
Aegir_M25_B79	2	99.46	0.537	95.44	1.64	0.468	66372	3419811	0.0192272	0.166986	0	0.0386665	0	0.00425761	0.0454158	0	0	Bacteria	Bacteroidota	Bacteroidia	Bacteroidales	UBA1556			d__Bacteria;p__Bacteroidota;c__Bacteroidia;o__Bacteroidales;f__UBA1556;g__;s__
Aegir_M25_B8	2	85.75	1.488	79.15	2	0.412	7284	2123883	0.00309163	0.0209219	0	0.0148186	0	0	0.0198444	0	0	Bacteria	Desulfobacterota	Syntrophobacteria	Syntrophobacterales	Thermodesulforhabdaceae	JALXAE01		d__Bacteria;p__Desulfobacterota;c__Syntrophobacteria;o__Syntrophobacterales;f__Thermodesulforhabdaceae;g__JALXAE01;s__
Aegir_M25_B80	0	77.11	3.729	66.12	2.07	0.341	6823	1428184	0.0429536	0.204879	0	2.07386	0.0783831	0.0055927	0.018223	0.108168	0	Bacteria	Campylobacterota	Campylobacteria	Campylobacterales	Sulfurovaceae	UBA1140		d__Bacteria;p__Campylobacterota;c__Campylobacteria;o__Campylobacterales;f__Sulfurovaceae;g__UBA1140;s__
Aegir_M25_B81	4	91.37	0	94.48	0.04	0.548	65939	1717712	0	0.138633	0.00398328	0.00205045	0	0	0.00102384	0	0.0140584	Bacteria	WOR-3	Hydrothermia	LBFQ01	LBFQ01	JAADCS01		d__Bacteria;p__WOR-3;c__Hydrothermia;o__LBFQ01;f__LBFQ01;g__JAADCS01;s__
Aegir_M25_B82	1	92.81	0	95.07	0.06	0.5	32437	1596400	0	0.0507898	0	0.00211437	0	0	0.00588928	0	0	Archaea	Halobacteriota	Archaeoglobi	Archaeoglobales	Archaeoglobaceae	Archaeoglobus		d__Archaea;p__Halobacteriota;c__Archaeoglobi;o__Archaeoglobales;f__Archaeoglobaceae;g__Archaeoglobus;s__
Aegir_M25_B83	4	86.66	2.603	96.9	3.64	0.735	8537	5356976	0	0.0237489	0	0.00695807	0	0	0.00755793	0	0	Bacteria	Myxococcota	UBA9042	PHBI01	JAAZYN01			d__Bacteria;p__Myxococcota;c__UBA9042;o__PHBI01;f__JAAZYN01;g__;s__
Aegir_M25_B84	3	99.56	0.869	100	0.06	0.625	88659	2454273	0	1.06214	0	0.00653857	0	0	0.0301073	0	0	Bacteria	Pseudomonadota	Alphaproteobacteria	Rhizobiales	Aestuariivirgaceae	Thermopetrobacter		d__Bacteria;p__Pseudomonadota;c__Alphaproteobacteria;o__Rhizobiales;f__Aestuariivirgaceae;g__Thermopetrobacter;s__
Aegir_M25_B85	1	53.07	1.282	56.19	0.27	0.616	4019	1008111	0	0.013587	0	0	0	0.000901093	0.0211862	0	0	Bacteria	WOR-3	Hydrothermia					d__Bacteria;p__WOR-3;c__Hydrothermia;o__;f__;g__;s__
Aegir_M25_B86	0	90.65	0.934	96.74	0.08	0.465	59913	1466225	0	0.165951	0	0.00287455	0	0	0.00759393	0	0	Archaea	Nanoarchaeota	Nanoarchaeia	Woesearchaeales	J091	J091		d__Archaea;p__Nanoarchaeota;c__Nanoarchaeia;o__Woesearchaeales;f__J091;g__J091;s__
Aegir_M25_B87	8	92.9	1.29	82.33	1.01	0.686	33035	5112726	0	0.181661	0	0.00334219	0	0	0.00360358	0	0.0200331	Bacteria	Myxococcota	Polyangia	Polyangiales	SG8-38	JALVDI01		d__Bacteria;p__Myxococcota;c__Polyangia;o__Polyangiales;f__SG8-38;g__JALVDI01;s__
Aegir_M25_B88	1	91.84	2.642	90.03	2.29	0.335	8854	1578861	0.00460892	0.0235364	0	0	0	0.00694815	0.00857098	0	0	Bacteria	Campylobacterota	Campylobacteria	Campylobacterales				d__Bacteria;p__Campylobacterota;c__Campylobacteria;o__Campylobacterales;f__;g__;s__
Aegir_M25_B89	0	86.44	0	89.55	0.86	0.312	51618	875573	0	0.0396909	0	0	0	0	0	0	0	Archaea	Micrarchaeota	Micrarchaeia	Anstonellales	J096	WAKO01		d__Archaea;p__Micrarchaeota;c__Micrarchaeia;o__Anstonellales;f__J096;g__WAKO01;s__
Aegir_M25_B9	2	74.5	4.77	67.59	3.1	0.42	5510	1396520	0.0481241	0.01963	0	0.0173152	0.0163551	0.00247667	0.0133399	1.12051	0	Bacteria	Pseudomonadota	Gammaproteobacteria	Methylococcales	Cycloclasticaceae	Cycloclasticus		d__Bacteria;p__Pseudomonadota;c__Gammaproteobacteria;o__Methylococcales;f__Cycloclasticaceae;g__Cycloclasticus;s__
Aegir_M25_B90	2	96.27	1.016	97.66	1.17	0.429	21062	1489066	0	0.123235	0.0192011	0	0	0	0	0	0.0131091	Bacteria	Aquificota	Aquificae	Aquificales	Aquificaceae	Aquifex		d__Bacteria;p__Aquificota;c__Aquificae;o__Aquificales;f__Aquificaceae;g__Aquifex;s__
Aegir_M25_B91	3	99.28	2.693	97.53	0.4	0.467	26504	2114329	0.00351888	0.0181235	0	0.00396791	0	0.00102327	0.0360693	0	0	Bacteria	Pseudomonadota	Gammaproteobacteria	Arenicellales	Poriferihabitantaceae			d__Bacteria;p__Pseudomonadota;c__Gammaproteobacteria;o__Arenicellales;f__Poriferihabitantaceae;g__;s__
Aegir_M25_B92	0	72.82	1.123	93.86	0.02	0.419	35277	728387	0	0.171349	0	0	0	0	0.00343923	0	0	Bacteria	Patescibacteria	Microgenomatia	UBA1400	PJMF01	WFTH01		d__Bacteria;p__Patescibacteria;c__Microgenomatia;o__UBA1400;f__PJMF01;g__WFTH01;s__
Aegir_M25_B93	3	97.63	0.995	99.61	0.7	0.686	58809	3545031	0.00378437	0.0340902	0	0.00277883	0	0	0	0	0.0443345	Bacteria	Pseudomonadota	Alphaproteobacteria	Geminicoccales	Geminicoccaceae	JALSRW01		d__Bacteria;p__Pseudomonadota;c__Alphaproteobacteria;o__Geminicoccales;f__Geminicoccaceae;g__JALSRW01;s__
Aegir_M25_B94	0	93.06	0.511	98.25	0.03	0.337	32937	3224022	0.0187607	0.0144816	0	0.131815	0	0	0.0376909	0	0	Bacteria	Bacteroidota	Bacteroidia	Chitinophagales	Saprospiraceae			d__Bacteria;p__Bacteroidota;c__Bacteroidia;o__Chitinophagales;f__Saprospiraceae;g__;s__
Aegir_M25_B95	3	97.88	1.478	100	0.61	0.509	51738	3072008	0.0852425	0.586484	0.00382902	0.0117007	0	0	0.0696916	0	0.00142236	Bacteria	Pseudomonadota	Gammaproteobacteria	GCA-001735895	GCA-001735895	JACNJF01		d__Bacteria;p__Pseudomonadota;c__Gammaproteobacteria;o__GCA-001735895;f__GCA-001735895;g__JACNJF01;s__
Aegir_M25_B96	1	91.8	0.42	96.28	0.28	0.679	29058	2687752	0	0.0321674	0	0	0	0	0	0	0.0125873	Bacteria	J088	J088	J088				d__Bacteria;p__J088;c__J088;o__J088;f__;g__;s__
Aegir_M25_B97	0	91.36	1.09	97.21	1.06	0.577	40011	3257508	0	0.333152	0.00127424	0	0	0	0.00690544	0	0.352638	Bacteria	Chloroflexota	Anaerolineae	JAADDB01	JAADDB01	JAADDB01		d__Bacteria;p__Chloroflexota;c__Anaerolineae;o__JAADDB01;f__JAADDB01;g__JAADDB01;s__
Aegir_M25_B98	2	93.12	2.805	99.04	0.37	0.64	48465	2576050	0.0116521	0.469079	0	0.0127065	0	0	0.0326962	0	0	Bacteria	Pseudomonadota	Gammaproteobacteria	Chromatiales	Sedimenticolaceae	Thiolapillus		d__Bacteria;p__Pseudomonadota;c__Gammaproteobacteria;o__Chromatiales;f__Sedimenticolaceae;g__Thiolapillus;s__
Aegir_M25_B99	1	86.36	1.818	95.87	0.71	0.629	72979	3035689	0	0.0407891	0	0.0202766	0	0	0.0425717	0	0	Bacteria	Chloroflexota	Anaerolineae	B4-G1	B4-G1	JALWUZ01		d__Bacteria;p__Chloroflexota;c__Anaerolineae;o__B4-G1;f__B4-G1;g__JALWUZ01;s__
Aegir_M26_B10	0	50.81	2.663	46.41	4.78	0.363	5519	953789	0.0168412	0.0185226	0.485188	0.00301538	0	0.0163021	0.23977	0.00135088	0.000609402	Bacteria	Campylobacterota	Campylobacteria	Campylobacterales	Sulfurimonadaceae	Sulfurimonas		d__Bacteria;p__Campylobacterota;c__Campylobacteria;o__Campylobacterales;f__Sulfurimonadaceae;g__Sulfurimonas;s__
Aegir_M26_B11	6	96.49	2.068	99.82	0.65	0.469	10060	3097457	0.130845	0.474036	0.20738	0.0254876	0	0	0.225157	0	0.0124205	Bacteria	Pseudomonadota	Gammaproteobacteria	Methylococcales	Methylomonadaceae	Methylomarinum		d__Bacteria;p__Pseudomonadota;c__Gammaproteobacteria;o__Methylococcales;f__Methylomonadaceae;g__Methylomarinum;s__
Aegir_M26_B12	2	58.62	0	60.16	2.09	0.261	6947	933127	0	0.0140364	2.25395	0.00131596	0	0	0.00360916	0	0.00213441	Bacteria	Campylobacterota	Campylobacteria	Nautiliales	Nautiliaceae	Caminibacter		d__Bacteria;p__Campylobacterota;c__Campylobacteria;o__Nautiliales;f__Nautiliaceae;g__Caminibacter;s__
Aegir_M26_B13	1	96.23	0.537	98.58	0.17	0.318	18836	2159475	0	0.0149278	0.0263099	0	0	0	0	0	0.00103948	Bacteria	Bacteroidota	Bacteroidia	Bacteroidales	JALTDM01	JALTDM01		d__Bacteria;p__Bacteroidota;c__Bacteroidia;o__Bacteroidales;f__JALTDM01;g__JALTDM01;s__
Aegir_M26_B14	1	86.68	4.573	91.59	4.11	0.511	7306	1409459	0.00135567	0.0344853	2.48566	0	0	0	0.0315609	0	0.193049	Bacteria	Pseudomonadota	Gammaproteobacteria	Thiomicrospirales	Thiomicrospiraceae	Sulfurivirga		d__Bacteria;p__Pseudomonadota;c__Gammaproteobacteria;o__Thiomicrospirales;f__Thiomicrospiraceae;g__Sulfurivirga;s__
Aegir_M26_B15	0	54.36	0.632	46.43	0.03	0.587	34204	573631	0.00173665	0.0405937	0.0704264	0	0	0	0	0	0	Archaea	Thermoproteota	Thermoprotei_A	Sulfolobales	Acidilobaceae	S143-63		d__Archaea;p__Thermoproteota;c__Thermoprotei_A;o__Sulfolobales;f__Acidilobaceae;g__S143-63;s__
Aegir_M26_B16	0	73.59	1.869	84.27	0.16	0.25	20577	632720	0	0.00655701	0.799608	0	0	0	0.00101531	0	0	Archaea	Nanoarchaeota	Nanoarchaeia					d__Archaea;p__Nanoarchaeota;c__Nanoarchaeia;o__;f__;g__;s__
Aegir_M26_B17	1	90.92	2.203	89.6	1.3	0.472	7695	1506278	0	0.0770783	0.0312355	0	0	0	0.015866	0	0	Bacteria	Thermosulfidibacterota	Thermosulfidibacteria	Thermosulfidibacterales	Thermosulfidibacteraceae			d__Bacteria;p__Thermosulfidibacterota;c__Thermosulfidibacteria;o__Thermosulfidibacterales;f__Thermosulfidibacteraceae;g__;s__
Aegir_M26_B18	2	92.47	0.406	90.89	0.41	0.31	23945	1482656	0.0011597	0.104891	0.929047	0	0	0	0.00709429	0	3.39786	Bacteria	Aquificota	Aquificae	Hydrogenothermales	Hydrogenothermaceae	Hydrogenothermus		d__Bacteria;p__Aquificota;c__Aquificae;o__Hydrogenothermales;f__Hydrogenothermaceae;g__Hydrogenothermus;s__
Aegir_M26_B19	2	94.3	1.626	99.3	0	0.251	23621	1231963	0	0.0113123	4.311	0	0	0	0.00699386	0	0	Bacteria	Campylobacterota	Campylobacteria	Nautiliales	Nautiliaceae			d__Bacteria;p__Campylobacterota;c__Campylobacteria;o__Nautiliales;f__Nautiliaceae;g__;s__
Aegir_M26_B2	1	93.9	3.184	100	1.75	0.467	12029	1590767	0	0.0133933	0.0436387	0	0	0	0.0140268	0	0	Bacteria	Campylobacterota	Campylobacteria	Campylobacterales	Hydrogenimonadaceae	Hydrogenimonas		d__Bacteria;p__Campylobacterota;c__Campylobacteria;o__Campylobacterales;f__Hydrogenimonadaceae;g__Hydrogenimonas;s__
Aegir_M26_B20	0	74.35	1.299	63.23	0.39	0.437	4980	1059877	0	0.0116201	0.0282208	0	0	0	0	0	0	Archaea	Thermoproteota	Thermoprotei_A	Sulfolobales	Ignicoccaceae	Ignicoccus		d__Archaea;p__Thermoproteota;c__Thermoprotei_A;o__Sulfolobales;f__Ignicoccaceae;g__Ignicoccus;s__
Aegir_M26_B21	2	54.7	5.487	53.98	5.6	0.343	4106	1305609	0.165062	0.00653972	0.0406445	0.0274292	0.00631383	0.0904124	0.0113622	0.00334444	0	Bacteria	Campylobacterota	Campylobacteria	Campylobacterales	Sulfurimonadaceae	Sulfurimonas	Sulfurimonas sp030949945	d__Bacteria;p__Campylobacterota;c__Campylobacteria;o__Campylobacterales;f__Sulfurimonadaceae;g__Sulfurimonas;s__Sulfurimonas sp030949945
Aegir_M26_B22	3	89.02	0.101	86.26	1.68	0.424	11506	1859365	0	0.00489192	0.123494	0.00212113	0	0	0.00144649	0	0	Bacteria	Pseudomonadota	Gammaproteobacteria	Thiomicrospirales	Thiomicrospiraceae	Thiosulfativibrio		d__Bacteria;p__Pseudomonadota;c__Gammaproteobacteria;o__Thiomicrospirales;f__Thiomicrospiraceae;g__Thiosulfativibrio;s__
Aegir_M26_B23	0	67.99	1.246	82.13	0.64	0.238	6174	486565	0	0.00816386	0.0335072	0	0	0	0	0	0	Archaea	Nanoarchaeota	Nanoarchaeia					d__Archaea;p__Nanoarchaeota;c__Nanoarchaeia;o__;f__;g__;s__
Aegir_M26_B24	0	96.21	1.68	96.72	1.49	0.27	20150	2373100	0	0.0652622	0.070786	0	0	0	0.00891251	0	0.00222233	Bacteria	DYJV01	DYJV01	DYJV01	JALVYZ01	JALVYZ01		d__Bacteria;p__DYJV01;c__DYJV01;o__DYJV01;f__JALVYZ01;g__JALVYZ01;s__
Aegir_M26_B25	1	91.1	0	91.67	0.95	0.296	40938	1368278	0	0.0380752	0.0427593	0	0	0	0.00208653	0	0.133115	Bacteria	Aquificota	Aquificae	Hydrogenothermales	Hydrogenothermaceae	Hydrogenothermus		d__Bacteria;p__Aquificota;c__Aquificae;o__Hydrogenothermales;f__Hydrogenothermaceae;g__Hydrogenothermus;s__
Aegir_M26_B26	8	99.94	0.917	99.99	0.37	0.658	162555	5727795	0.00179399	0.0432168	0.0479809	0	0	0.00366672	0	0.000704915	0	Bacteria	Pseudomonadota	Gammaproteobacteria	Burkholderiales	Burkholderiaceae	Ralstonia	Ralstonia sp913056305	d__Bacteria;p__Pseudomonadota;c__Gammaproteobacteria;o__Burkholderiales;f__Burkholderiaceae;g__Ralstonia;s__Ralstonia sp913056305
Aegir_M26_B27	4	88.49	0.982	92.17	0.64	0.493	7268	2163204	0.00549358	0.0776715	0.0224975	0.00298483	0	0	0.0633335	0	0.00906521	Bacteria	Pseudomonadota	Gammaproteobacteria	Nitrosococcales	Methylophagaceae	GCA-002733105		d__Bacteria;p__Pseudomonadota;c__Gammaproteobacteria;o__Nitrosococcales;f__Methylophagaceae;g__GCA-002733105;s__
Aegir_M26_B28	1	95.58	0	99.32	0.03	0.311	40276	2144419	0.00130666	0.0316355	0.158407	0	0	0	0.0158036	0	0.00589052	Bacteria	Bacteroidota	Bacteroidia	Flavobacteriales	JAADED01	JALSPZ01		d__Bacteria;p__Bacteroidota;c__Bacteroidia;o__Flavobacteriales;f__JAADED01;g__JALSPZ01;s__
Aegir_M26_B29	1	94.3	0	88.45	0.09	0.329	39667	1891037	0.00703783	0.0173706	0.209635	0	0	0.0300841	0.00799723	0	0	Bacteria	Campylobacterota	Campylobacteria	Campylobacterales	Sulfurimonadaceae	GLR69		d__Bacteria;p__Campylobacterota;c__Campylobacteria;o__Campylobacterales;f__Sulfurimonadaceae;g__GLR69;s__
Aegir_M26_B3	1	97.69	1.923	97.84	0.5	0.322	27387	2284367	0.0208072	0.0131717	0.0838312	0.171744	0.0478714	0.0296179	0.0752945	0	0	Bacteria	Campylobacterota	Campylobacteria	Campylobacterales	Sulfurospirillaceae	Sulfurospirillum_A		d__Bacteria;p__Campylobacterota;c__Campylobacteria;o__Campylobacterales;f__Sulfurospirillaceae;g__Sulfurospirillum_A;s__
Aegir_M26_B30	0	84.11	0	94.45	0.18	0.53	59509	939652	0	0.0272859	0.0952928	0	0	0	0.00232992	0	0	Archaea	Iainarchaeota	Iainarchaeia	JAADDC01	JAADDC01	SZUA-1452		d__Archaea;p__Iainarchaeota;c__Iainarchaeia;o__JAADDC01;f__JAADDC01;g__SZUA-1452;s__
Aegir_M26_B31	1	77.21	1.898	68.26	0.22	0.54	147373	955857	0	0.0247437	0.10717	0.00112401	0	0	0	0	0	Archaea	Thermoproteota	Thermoprotei_A	Sulfolobales	Pyrodictiaceae	QNYQ01		d__Archaea;p__Thermoproteota;c__Thermoprotei_A;o__Sulfolobales;f__Pyrodictiaceae;g__QNYQ01;s__
Aegir_M26_B32	2	95.32	1.863	92.96	1.52	0.381	17040	1632546	0	0.161416	0.0271353	0.00626091	0	0	0.034412	0	0.0655962	Bacteria	Aquificota	Aquificae	Hydrogenothermales	Hydrogenothermaceae	Persephonella		d__Bacteria;p__Aquificota;c__Aquificae;o__Hydrogenothermales;f__Hydrogenothermaceae;g__Persephonella;s__
Aegir_M26_B33	1	55.22	0.404	63.79	1.62	0.363	3053	1464411	0.015032	0.00335611	0.0251342	0	0	0	0.0108718	0	0.00100034	Bacteria	Pseudomonadota	Gammaproteobacteria	Enterobacterales	Alteromonadaceae	GCA-2401725		d__Bacteria;p__Pseudomonadota;c__Gammaproteobacteria;o__Enterobacterales;f__Alteromonadaceae;g__GCA-2401725;s__
Aegir_M26_B34	0	89.15	1.321	91.79	0.07	0.343	8710	1574794	0	0.0446434	0.0465535	0.00247284	0	0.00884838	0.00611778	0	0	Bacteria	Campylobacterota	Campylobacteria	Campylobacterales	Hydrogenimonadaceae	Hydrogenimonas		d__Bacteria;p__Campylobacterota;c__Campylobacteria;o__Campylobacterales;f__Hydrogenimonadaceae;g__Hydrogenimonas;s__
Aegir_M26_B35	1	99.31	1.476	99.74	0.2	0.533	63761	1246007	0	0.00819762	0.10637	0	0	0	0	0	0	Archaea	Thermoproteota	Thermoprotei_A	Sulfolobales	Ignicoccaceae	Ignicoccus		d__Archaea;p__Thermoproteota;c__Thermoprotei_A;o__Sulfolobales;f__Ignicoccaceae;g__Ignicoccus;s__
Aegir_M26_B36	0	96.42	2.272	96.76	0.07	0.37	105533	1551458	0	0.00145773	0.0654874	0	0	0	0	0	0	Bacteria	Coprothermobacterota	Coprothermobacteria	Coprothermobacterales	JAADFF01	JAADFF01		d__Bacteria;p__Coprothermobacterota;c__Coprothermobacteria;o__Coprothermobacterales;f__JAADFF01;g__JAADFF01;s__
Aegir_M26_B37	2	53.44	0	47.78	0.24	0.425	15843	920591	0.0326911	0.000596074	0.21416	0.0547928	0	0	0	0	0	Bacteria	Pseudomonadota	Gammaproteobacteria	Thiomicrospirales	Thiomicrospiraceae	Thiomicrorhabdus		d__Bacteria;p__Pseudomonadota;c__Gammaproteobacteria;o__Thiomicrospirales;f__Thiomicrospiraceae;g__Thiomicrorhabdus;s__
Aegir_M26_B38	0	83.88	3.685	81.47	1.59	0.503	12137	1576204	0.00132791	0.166046	0.710658	0.00116845	0	0	0.0267535	0	0.00492769	Archaea	Methanobacteriota_B	Thermococci	Thermococcales	Thermococcaceae	Thermococcus		d__Archaea;p__Methanobacteriota_B;c__Thermococci;o__Thermococcales;f__Thermococcaceae;g__Thermococcus;s__
Aegir_M26_B39	0	98.31	2.531	98.77	0.38	0.397	21768	1503490	0	0.0257043	0.287409	0	0	0	0.00456106	0	0	Bacteria	Aquificota	Desulfurobacteriia	Desulfurobacteriales	Desulfurobacteriaceae	Desulfurobacterium_B		d__Bacteria;p__Aquificota;c__Desulfurobacteriia;o__Desulfurobacteriales;f__Desulfurobacteriaceae;g__Desulfurobacterium_B;s__
Aegir_M26_B4	0	88.21	3.319	86.05	3.1	0.368	10416	1478230	0.0017749	0.0765686	0.8552	0.002821	0	0	0.0287265	0	0.00792939	Bacteria	Campylobacterota	Campylobacteria	Campylobacterales	Nitratiruptoraceae	Nitratiruptor		d__Bacteria;p__Campylobacterota;c__Campylobacteria;o__Campylobacterales;f__Nitratiruptoraceae;g__Nitratiruptor;s__
Aegir_M26_B40	1	68.84	3.699	75.75	3.91	0.42	4490	994554	0.0046641	0.185608	9.92519	0.00611165	0	0.0013137	0.0151668	0	0	Bacteria	Aquificota	Aquificae	Aquificales	QOAS01	QOAS01		d__Bacteria;p__Aquificota;c__Aquificae;o__Aquificales;f__QOAS01;g__QOAS01;s__
Aegir_M26_B41	0	88.6	0.843	87.64	0.13	0.541	64651	1317820	0.00435749	0.0397531	0.0667095	0	0	0	0	0	0	Archaea	Thermoproteota	Thermoprotei_A	Sulfolobales	Acidilobaceae			d__Archaea;p__Thermoproteota;c__Thermoprotei_A;o__Sulfolobales;f__Acidilobaceae;g__;s__
Aegir_M26_B42	1	76.89	3.793	71.45	1.03	0.273	5883	1920688	0	0.00753511	0.0341685	0	0	0	0.00475729	0	0.00937214	Bacteria	Thermotogota	Thermotogae	Petrotogales	Petrotogaceae	Marinitoga		d__Bacteria;p__Thermotogota;c__Thermotogae;o__Petrotogales;f__Petrotogaceae;g__Marinitoga;s__
Aegir_M26_B43	0	55.37	0.632	52.12	0.17	0.471	81662	746815	0	0.0743844	0.026628	0	0	0	0	0	0	Archaea	Thermoproteota	Thermoprotei_A	Sulfolobales	Acidilobaceae			d__Archaea;p__Thermoproteota;c__Thermoprotei_A;o__Sulfolobales;f__Acidilobaceae;g__;s__
Aegir_M26_B44	0	50.74	1.98	51.19	2.17	0.538	14019	860597	0	0.0210183	0.0611095	0	0	0	0.0279188	0	0	Archaea	Methanobacteriota_B	Thermococci	Thermococcales	Thermococcaceae	Thermococcus		d__Archaea;p__Methanobacteriota_B;c__Thermococci;o__Thermococcales;f__Thermococcaceae;g__Thermococcus;s__
Aegir_M26_B45	0	94.46	1.702	99.51	0.05	0.687	58998	1904545	0	0.0498819	0.210248	0	0	0	0.00220669	0	1.07795	Bacteria	Deinococcota	Deinococci	Deinococcales	Marinithermaceae	WFXV01		d__Bacteria;p__Deinococcota;c__Deinococci;o__Deinococcales;f__Marinithermaceae;g__WFXV01;s__
Aegir_M26_B46	1	95.52	5.907	95	1.69	0.637	13113	1656469	0.00121613	0.0867673	0.541359	0	0	0	0	0	0	Archaea	Thermoproteota	Thermoprotei_A	Sulfolobales	Pyrodictiaceae	QNYQ01		d__Archaea;p__Thermoproteota;c__Thermoprotei_A;o__Sulfolobales;f__Pyrodictiaceae;g__QNYQ01;s__
Aegir_M26_B47	2	63.68	1.229	62.56	0.11	0.355	9265	1139109	0.00964085	0.0578371	7.58767	0.00229787	0	0.0279213	0.0679292	0.00147728	0	Bacteria	Campylobacterota	Campylobacteria	Campylobacterales	Sulfurimonadaceae	Sulfurimonas		d__Bacteria;p__Campylobacterota;c__Campylobacteria;o__Campylobacterales;f__Sulfurimonadaceae;g__Sulfurimonas;s__
Aegir_M26_B5	1	93.39	0.813	92.11	0.63	0.298	15899	1454610	0	0.168781	0.634546	0.00686336	0	0	0.029938	0	0.317263	Bacteria	Aquificota	Aquificae	Hydrogenothermales	Hydrogenothermaceae	QNZC01		d__Bacteria;p__Aquificota;c__Aquificae;o__Hydrogenothermales;f__Hydrogenothermaceae;g__QNZC01;s__
Aegir_M26_B6	1	53.44	0	55.38	0.55	0.275	7870	941644	0	0.0191195	2.2845	0.00471544	0	0.00498508	0.00420661	0	0	Bacteria	Campylobacterota	Campylobacteria	Nautiliales	JAADDX01			d__Bacteria;p__Campylobacterota;c__Campylobacteria;o__Nautiliales;f__JAADDX01;g__;s__
Aegir_M26_B7	0	99.46	0.672	99.88	0.05	0.353	43139	2526989	0.00437474	0.121772	0.0652271	0.00762548	0	0	0.0127292	0	0.00722105	Bacteria	Bacteroidota	Bacteroidia	Flavobacteriales	Vicingaceae	UBA852		d__Bacteria;p__Bacteroidota;c__Bacteroidia;o__Flavobacteriales;f__Vicingaceae;g__UBA852;s__
Aegir_M26_B8	1	94.51	1.829	97.33	0.03	0.27	18161	1476261	0	0.0274174	0.343608	0.00698845	0	0.00413056	0.0104812	0	0	Bacteria	Campylobacterota	Campylobacteria	Campylobacterales				d__Bacteria;p__Campylobacterota;c__Campylobacteria;o__Campylobacterales;f__;g__;s__
Aegir_M26_B9	0	86.43	1.075	86.62	0.16	0.346	11172	2310195	0	0.0255968	0.113112	0.00774763	0	0	0.0419129	0	0	Bacteria	Bacteroidota	Bacteroidia	Bacteroidales	S143-33	S143-33		d__Bacteria;p__Bacteroidota;c__Bacteroidia;o__Bacteroidales;f__S143-33;g__S143-33;s__
Aegir_M36_B1	3	94.71	1.939	97.98	0.71	0.414	99178	2228926	0.047225	0.00833161	0	0.185208	0.0121407	0	0.00490667	0.0437036	0	Bacteria	Pseudomonadota	Gammaproteobacteria	Methylococcales	Cycloclasticaceae	Cycloclasticus		d__Bacteria;p__Pseudomonadota;c__Gammaproteobacteria;o__Methylococcales;f__Cycloclasticaceae;g__Cycloclasticus;s__
Aegir_M36_B10	2	87.9	1.075	92.84	0.86	0.308	9918	2853092	0	0	0	0.0734797	0.00359725	0	0.00243621	0	0	Bacteria	Bacteroidota	Bacteroidia	Bacteroidales	Salinivirgaceae			d__Bacteria;p__Bacteroidota;c__Bacteroidia;o__Bacteroidales;f__Salinivirgaceae;g__;s__
Aegir_M36_B11	1	58.87	8.622	51.29	8.08	0.308	3581	2314104	0.0467241	0.013817	0	0.0556629	0.0102823	0.00318152	0.0251432	0.00625718	0	Bacteria	Bacteroidota	Bacteroidia	Cytophagales	JAHDFW01			d__Bacteria;p__Bacteroidota;c__Bacteroidia;o__Cytophagales;f__JAHDFW01;g__;s__
Aegir_M36_B12	3	84.93	2.787	76.79	1.58	0.426	8094	1697727	0.125907	0.0054185	0	0.0279132	0.0531307	0.0116007	0.00735578	0.0290042	0	Bacteria	Pseudomonadota	Gammaproteobacteria	Nitrosococcales	Methylophagaceae	GCA-002733105		d__Bacteria;p__Pseudomonadota;c__Gammaproteobacteria;o__Nitrosococcales;f__Methylophagaceae;g__GCA-002733105;s__
Aegir_M36_B13	4	87.31	1.034	95.31	1.15	0.403	19514	2565182	0.158785	0.0092585	0	0.140911	0.560413	0.00604095	0.0766758	0.0138887	0	Bacteria	Pseudomonadota	Gammaproteobacteria	Thiotrichales	Thiotrichaceae	Cocleimonas		d__Bacteria;p__Pseudomonadota;c__Gammaproteobacteria;o__Thiotrichales;f__Thiotrichaceae;g__Cocleimonas;s__
Aegir_M36_B14	0	76.85	0.925	100	0.03	0.398	117259	879889	0	0	0	0.116207	0	0	0	0	0	Bacteria	Patescibacteria	Gracilibacteria	UBA4473	UBA4473	M50B91		d__Bacteria;p__Patescibacteria;c__Gracilibacteria;o__UBA4473;f__UBA4473;g__M50B91;s__
Aegir_M36_B15	3	79.56	0.645	95.25	3.33	0.314	20869	3311034	0	0.00164997	0	0.101362	0	0	0.0114978	0	0	Bacteria	Myxococcota	Polyangia	HGW-17	HGW-17			d__Bacteria;p__Myxococcota;c__Polyangia;o__HGW-17;f__HGW-17;g__;s__
Aegir_M36_B16	0	82.65	2.245	76.95	4.78	0.36	14886	1511291	0.223476	0.0289734	0	0.689348	0.320551	0.00492925	0.0551306	0.0102328	0	Bacteria	Campylobacterota	Campylobacteria	Campylobacterales	Sulfurovaceae	Sulfurovum		d__Bacteria;p__Campylobacterota;c__Campylobacteria;o__Campylobacterales;f__Sulfurovaceae;g__Sulfurovum;s__
Aegir_M36_B17	5	88.85	0.762	94.83	0.14	0.398	24299	1945792	0.136466	0.128525	0.00184922	2.2	0.0182488	0.011463	0.937825	0.0484621	0	Bacteria	Pseudomonadota	Gammaproteobacteria	Nitrosococcales	Methylophagaceae	GCA-002733105		d__Bacteria;p__Pseudomonadota;c__Gammaproteobacteria;o__Nitrosococcales;f__Methylophagaceae;g__GCA-002733105;s__
Aegir_M36_B19	1	91.56	0.643	90.38	0.7	0.285	26156	2522659	0.118418	0.00912484	0	1.28029	0.0593129	0.0110084	0.240028	0.00336489	0	Bacteria	Bacteroidota	Bacteroidia	Flavobacteriales	Flavobacteriaceae	S010-17		d__Bacteria;p__Bacteroidota;c__Bacteroidia;o__Flavobacteriales;f__Flavobacteriaceae;g__S010-17;s__
Aegir_M36_B2	8	97.2	0.714	95.48	1.1	0.375	16328	2780010	0.0154403	0.00219649	0	0.0880666	0	0	0.00238688	0	0	Bacteria	Desulfobacterota	Desulfobacteria	Desulfobacterales	Desulfobacteraceae			d__Bacteria;p__Desulfobacterota;c__Desulfobacteria;o__Desulfobacterales;f__Desulfobacteraceae;g__;s__
Aegir_M36_B20	2	92.07	2.049	87.78	1.53	0.372	14803	1779073	1.35829	0.00657735	0.00178441	1.43458	0.0111191	0.00827834	0.00552158	0.00840915	0	Bacteria	Campylobacterota	Campylobacteria	Campylobacterales	Sulfurovaceae	Sulfurovum		d__Bacteria;p__Campylobacterota;c__Campylobacteria;o__Campylobacterales;f__Sulfurovaceae;g__Sulfurovum;s__
Aegir_M36_B21	2	89.15	3.636	90.19	6.14	0.548	8385	5349261	0.0493504	0.208269	0	0.0317567	0	0.000700012	0.0647079	0	0	Bacteria	Chloroflexota	Anaerolineae	Promineofilales	Promineofilaceae	JAJRTP01		d__Bacteria;p__Chloroflexota;c__Anaerolineae;o__Promineofilales;f__Promineofilaceae;g__JAJRTP01;s__
Aegir_M36_B22	0	69.24	0.614	58.36	0.1	0.344	14387	1185764	0.00342753	0.0261248	0.00301613	3.18177	0.0128585	0.02583	0.00781838	0.00470075	0	Bacteria	Campylobacterota	Campylobacteria	Campylobacterales	Sulfurovaceae	UBA1140		d__Bacteria;p__Campylobacterota;c__Campylobacteria;o__Campylobacterales;f__Sulfurovaceae;g__UBA1140;s__
Aegir_M36_B23	4	87.09	1.894	93.53	0.25	0.566	20576	2983208	0.138962	0.0175454	0	0.0492864	0.00853491	0.0536019	0.0248183	0.00402587	0	Bacteria	Pseudomonadota	Alphaproteobacteria	Rhodobacterales	Rhodobacteraceae	UBA3077		d__Bacteria;p__Pseudomonadota;c__Alphaproteobacteria;o__Rhodobacterales;f__Rhodobacteraceae;g__UBA3077;s__
Aegir_M36_B24	2	99.19	0.806	98.81	0.09	0.37	27831	3005227	0.0520462	0.0303771	0	0.399369	0.00256322	0.00375334	0.20852	0	0	Bacteria	Bacteroidota	Bacteroidia	Flavobacteriales	Salibacteraceae	CAJXZP01		d__Bacteria;p__Bacteroidota;c__Bacteroidia;o__Flavobacteriales;f__Salibacteraceae;g__CAJXZP01;s__
Aegir_M36_B25	0	53.62	0	62.49	1.78	0.335	6118	1303265	0.0697139	0.0149006	0	0.857189	0.0456318	0.00501598	0.0301263	0.123848	0	Bacteria	Campylobacterota	Campylobacteria	Campylobacterales	Sulfurovaceae	UBA1140		d__Bacteria;p__Campylobacterota;c__Campylobacteria;o__Campylobacterales;f__Sulfurovaceae;g__UBA1140;s__
Aegir_M36_B26	2	75.51	3.498	71.72	2.63	0.316	6823	2315304	0.0527353	0.00115453	0	0.0834942	0.00949645	0.00548234	0.0288913	0.0143238	0	Bacteria	Bacteroidota	Bacteroidia	Flavobacteriales	Vicingaceae	GCA-002793235		d__Bacteria;p__Bacteroidota;c__Bacteroidia;o__Flavobacteriales;f__Vicingaceae;g__GCA-002793235;s__
Aegir_M36_B27	0	56.73	1.724	76.97	2.03	0.278	5672	453462	0	0	0	0.0687963	0	0.00231751	0.0228712	0	0	Bacteria	Patescibacteria	Paceibacteria	UBA9983_A	UBA1006	UBA1006		d__Bacteria;p__Patescibacteria;c__Paceibacteria;o__UBA9983_A;f__UBA1006;g__UBA1006;s__
Aegir_M36_B28	6	94.86	3.894	98.38	0.39	0.69	34316	6329573	0.00317638	0	0	0.0822896	0	0.00200394	0.0542265	0	0	Bacteria	Myxococcota	Polyangia	Polyangiales	SG8-38	JAADHO01		d__Bacteria;p__Myxococcota;c__Polyangia;o__Polyangiales;f__SG8-38;g__JAADHO01;s__
Aegir_M36_B29	0	74.15	1.123	97.96	0.2	0.35	18187	1216973	0	0.00425989	0	0.0995369	0.00743734	0	0	0.00191695	0	Bacteria	Patescibacteria	Gracilibacteria	CAIRYL01	CAIRYL01	SZUA-1403		d__Bacteria;p__Patescibacteria;c__Gracilibacteria;o__CAIRYL01;f__CAIRYL01;g__SZUA-1403;s__
Aegir_M36_B3	5	58.94	1.612	58.83	2.17	0.328	3959	1923471	0.0025022	0.014914	0	0.0538038	0	0.00378249	0.0249878	0	0	Bacteria	Bacteroidota	Bacteroidia	Bacteroidales	UBA1556	4572-112		d__Bacteria;p__Bacteroidota;c__Bacteroidia;o__Bacteroidales;f__UBA1556;g__4572-112;s__
Aegir_M36_B30	0	95.54	0.511	100	0.02	0.337	54644	3369458	0.0227326	0.0113911	0	0.172014	0	0	0.0467477	0	0	Bacteria	Bacteroidota	Bacteroidia	Chitinophagales	Saprospiraceae			d__Bacteria;p__Bacteroidota;c__Bacteroidia;o__Chitinophagales;f__Saprospiraceae;g__;s__
Aegir_M36_B31	0	76.85	3.448	92.98	1.78	0.331	28195	704013	0.0122267	0.00127162	0	0.424355	0.00438086	0	0.00984685	0.00357207	0	Bacteria	Patescibacteria	Paceibacteria	UBA9983_A	UBA1006	UBA1006		d__Bacteria;p__Patescibacteria;c__Paceibacteria;o__UBA9983_A;f__UBA1006;g__UBA1006;s__
Aegir_M36_B32	0	50.86	0	44.42	0.78	0.338	7421	947350	0.0249836	0.14535	0	1.74364	0.0548633	0.00457584	0.0146023	0.0778213	0	Bacteria	Campylobacterota	Campylobacteria	Campylobacterales	Sulfurovaceae	UBA1140		d__Bacteria;p__Campylobacterota;c__Campylobacteria;o__Campylobacterales;f__Sulfurovaceae;g__UBA1140;s__
Aegir_M36_B33	4	94.5	2.036	95.79	0.93	0.578	54856	2840906	0.0655233	0.0217697	0	1.43945	0.00325715	0.0323402	0.131832	0.0065136	0	Bacteria	Pseudomonadota	Alphaproteobacteria	Rhodobacterales	Rhodobacteraceae	UBA3077		d__Bacteria;p__Pseudomonadota;c__Alphaproteobacteria;o__Rhodobacterales;f__Rhodobacteraceae;g__UBA3077;s__
Aegir_M36_B34	8	95.48	1.29	96.72	2.7	0.664	106949	5815591	0.00152774	0.0207891	0	0.263514	0	0	0.0098731	0	0	Bacteria	Myxococcota	UBA796	UBA796	CAJQPC01	CAJQPC01		d__Bacteria;p__Myxococcota;c__UBA796;o__UBA796;f__CAJQPC01;g__CAJQPC01;s__
Aegir_M36_B35	5	97.73	3.296	99.63	1.09	0.451	28250	3821845	0.0144162	0.000944655	0	0.0578742	0	0.0192646	0.0574978	0.000938398	0	Bacteria	Calditrichota	Calditrichia	Calditrichales	Calditrichaceae	JANTFQ01		d__Bacteria;p__Calditrichota;c__Calditrichia;o__Calditrichales;f__Calditrichaceae;g__JANTFQ01;s__
Aegir_M36_B36	1	76.6	0	88.33	1.66	0.656	5536	2663985	0	0.0171855	0	0.0332868	0	0.00206825	0.0147659	0	0	Bacteria	Chloroflexota	Anaerolineae	B4-G1	DUEL01	SZUA-1492		d__Bacteria;p__Chloroflexota;c__Anaerolineae;o__B4-G1;f__DUEL01;g__SZUA-1492;s__
Aegir_M36_B37	1	88.18	0.101	94.14	3.5	0.569	7722	2573417	0	0.0100373	0	0.0483324	0	0	0.014256	0	0	Bacteria	Chloroflexota	Anaerolineae	Aggregatilineales	JAFGMM01			d__Bacteria;p__Chloroflexota;c__Anaerolineae;o__Aggregatilineales;f__JAFGMM01;g__;s__
Aegir_M36_B38	4	92.68	1.524	85.71	0.36	0.434	32429	1986629	0.00963229	0	0	0.142643	0	0	0	0	0	Bacteria	Pseudomonadota	Gammaproteobacteria	Thiomicrospirales	Thiomicrospiraceae	Thiosulfativibrio		d__Bacteria;p__Pseudomonadota;c__Gammaproteobacteria;o__Thiomicrospirales;f__Thiomicrospiraceae;g__Thiosulfativibrio;s__
Aegir_M36_B39	1	97.8	0	100	0.92	0.3	41555	2194856	0	0.00497251	0	0.111761	0	0	0	0	0	Bacteria	Cloacimonadota	Cloacimonadia	Cloacimonadales				d__Bacteria;p__Cloacimonadota;c__Cloacimonadia;o__Cloacimonadales;f__;g__;s__
Aegir_M36_B4	2	93.01	0.537	91.75	0.14	0.318	12738	3482422	0.00593512	0.00607318	0	0.0347889	0	0	0.0380113	0	0	Bacteria	Bacteroidota	Bacteroidia	Bacteroidales	NBLH01	NBLH01		d__Bacteria;p__Bacteroidota;c__Bacteroidia;o__Bacteroidales;f__NBLH01;g__NBLH01;s__
Aegir_M36_B40	4	82.07	0.862	82.04	0.03	0.388	21205	2266713	0.169891	0.0100856	0	0.476431	0.0724696	0.0148764	0.0368474	0	0	Bacteria	Pseudomonadota	Gammaproteobacteria	Methylococcales	Methylomonadaceae	Methyloprofundus		d__Bacteria;p__Pseudomonadota;c__Gammaproteobacteria;o__Methylococcales;f__Methylomonadaceae;g__Methyloprofundus;s__
Aegir_M36_B41	5	94.54	1.724	99.29	0.18	0.394	30562	3245234	0.493944	0.154256	0	5.40266	0.196137	0.0226541	2.19615	0.0291276	0	Bacteria	Pseudomonadota	Gammaproteobacteria	Methylococcales	Methylomonadaceae	Methyloprofundus	Methyloprofundus sp900128525	d__Bacteria;p__Pseudomonadota;c__Gammaproteobacteria;o__Methylococcales;f__Methylomonadaceae;g__Methyloprofundus;s__Methyloprofundus sp900128525
Aegir_M36_B42	4	88.94	2.15	89.23	2.47	0.323	14190	2598150	0.0887437	0.00238813	0	0.473915	0.0799683	0.00778596	0.202649	0.0207898	0	Bacteria	Bacteroidota	Bacteroidia	Flavobacteriales	Vicingaceae	GCA-002793235		d__Bacteria;p__Bacteroidota;c__Bacteroidia;o__Flavobacteriales;f__Vicingaceae;g__GCA-002793235;s__
Aegir_M36_B43	8	90.1	3.064	94.01	3.37	0.653	13716	5779716	0.0234597	0.00334041	0	0.0801965	0	0	0.025993	0	0	Bacteria	Myxococcota	UBA9042	PHBI01	PHBI01			d__Bacteria;p__Myxococcota;c__UBA9042;o__PHBI01;f__PHBI01;g__;s__
Aegir_M36_B44	3	91.92	1.474	89.13	0.35	0.581	13928	3048945	0.133184	0.0469965	0	0.650663	0.00303022	0.00826826	0.156417	0	0	Bacteria	Pseudomonadota	Alphaproteobacteria	Rhodobacterales	Rhodobacteraceae	Profundibacter	Profundibacter amoris	d__Bacteria;p__Pseudomonadota;c__Alphaproteobacteria;o__Rhodobacterales;f__Rhodobacteraceae;g__Profundibacter;s__Profundibacter amoris
Aegir_M36_B45	3	96.72	0.546	94.45	0.26	0.337	13357	4108183	0.17881	0	0	0.24848	0	0	0.00612121	0.00898477	0	Bacteria	Bacteroidota	Bacteroidia	Cytophagales	Bernardetiaceae			d__Bacteria;p__Bacteroidota;c__Bacteroidia;o__Cytophagales;f__Bernardetiaceae;g__;s__
Aegir_M36_B46	10	87.74	1.958	96.46	1.32	0.47	57312	5396107	0.00895777	0.0060537	0	0.467103	0	0	0	0	0	Bacteria	Myxococcota	UBA727	UBA727				d__Bacteria;p__Myxococcota;c__UBA727;o__UBA727;f__;g__;s__
Aegir_M36_B47	0	88.94	7.476	87.42	2.66	0.387	9611	2657297	0	0	0	0.0657425	0	0	0	0.0044142	0	Archaea	Asgardarchaeota	Heimdallarchaeia	JABLTI01	JABLTI01	JABLTI01		d__Archaea;p__Asgardarchaeota;c__Heimdallarchaeia;o__JABLTI01;f__JABLTI01;g__JABLTI01;s__
Aegir_M36_B48	3	95.44	1.208	90.31	0.7	0.325	20399	1980097	0.0870071	0.00834356	0.0119572	0.837712	0.120944	0.0351921	0.087141	0	0	Bacteria	Campylobacterota	Campylobacteria	Campylobacterales	Sulfurospirillaceae	Sulfurospirillum_A		d__Bacteria;p__Campylobacterota;c__Campylobacteria;o__Campylobacterales;f__Sulfurospirillaceae;g__Sulfurospirillum_A;s__
Aegir_M36_B49	2	92.33	0.95	97.32	0.12	0.33	38163	2653880	0.103878	0.0120728	0	0.0413579	0.0352507	0.0298554	0.269732	0.0490281	0	Bacteria	Bacteroidota	Bacteroidia	Flavobacteriales	Flavobacteriaceae	GCA-002733185		d__Bacteria;p__Bacteroidota;c__Bacteroidia;o__Flavobacteriales;f__Flavobacteriaceae;g__GCA-002733185;s__
Aegir_M36_B5	3	70.45	1.29	74.41	1.05	0.469	4603	1769342	0.0344442	0.001259	0	0.0383498	0	0	0.0279667	0	0	Bacteria	Desulfobacterota_F	Desulfuromonadia	Desulfuromonadales	Geopsychrobacteraceae			d__Bacteria;p__Desulfobacterota_F;c__Desulfuromonadia;o__Desulfuromonadales;f__Geopsychrobacteraceae;g__;s__
Aegir_M36_B50	1	95.38	1.339	97.99	0.38	0.351	23490	3449941	0.556707	0.00136052	0	1.35132	0.016341	0.00569974	0.141988	0.00659175	0	Bacteria	Bacteroidota	Bacteroidia	Cytophagales	Cyclobacteriaceae	JAKISE01		d__Bacteria;p__Bacteroidota;c__Bacteroidia;o__Cytophagales;f__Cyclobacteriaceae;g__JAKISE01;s__
Aegir_M36_B51	1	67.42	2.101	76.87	1.91	0.595	4647	2175637	0.00349699	0.016298	0	0.0317775	0	0.00304516	0.017478	0	0	Bacteria	Chloroflexota	Anaerolineae	Anaerolineales	UBA11858	UBA11858		d__Bacteria;p__Chloroflexota;c__Anaerolineae;o__Anaerolineales;f__UBA11858;g__UBA11858;s__
Aegir_M36_B52	0	70.23	2.837	64.84	0.36	0.368	4978	1389854	0.0208334	0.00329464	0	0.0260658	0.0237751	0.0100097	0.0324564	0	0	Bacteria	Campylobacterota	Campylobacteria	Campylobacterales	QNZT01	JANTGR01		d__Bacteria;p__Campylobacterota;c__Campylobacteria;o__Campylobacterales;f__QNZT01;g__JANTGR01;s__
Aegir_M36_B53	3	91.86	4.098	83.88	0.97	0.357	24182	1940024	0.529898	0.0113236	0	0.250629	0.0675394	0.00542879	0.00733048	0.117762	0	Bacteria	Campylobacterota	Campylobacteria	Campylobacterales	Sulfurovaceae	Sulfurovum		d__Bacteria;p__Campylobacterota;c__Campylobacteria;o__Campylobacterales;f__Sulfurovaceae;g__Sulfurovum;s__
Aegir_M36_B54	2	94.6	2.304	93.2	0	0.318	48412	3297028	0.0576411	0.014206	0	0.129494	0.111931	0.0123659	0.638897	0.0107334	0	Bacteria	Bacteroidota	Bacteroidia	Flavobacteriales	Flavobacteriaceae	Lutimonas		d__Bacteria;p__Bacteroidota;c__Bacteroidia;o__Flavobacteriales;f__Flavobacteriaceae;g__Lutimonas;s__
Aegir_M36_B55	0	88.7	1.844	80.32	0.35	0.297	7862	1320042	0	0.0341852	0.00977506	0.0267344	0	0.0052154	0.0255705	0	0.0030189	Bacteria	Campylobacterota	Campylobacteria	Campylobacterales	Sulfurovaceae	JAADEQ01		d__Bacteria;p__Campylobacterota;c__Campylobacteria;o__Campylobacterales;f__Sulfurovaceae;g__JAADEQ01;s__
Aegir_M36_B56	1	98.91	0	96.94	0.1	0.29	50296	2901795	0.00915193	0.0207712	0	0.552085	0	0.00203453	0.0992554	0	0	Bacteria	Bacteroidota	Bacteroidia	Flavobacteriales	Crocinitomicaceae	Putridiphycobacter		d__Bacteria;p__Bacteroidota;c__Bacteroidia;o__Flavobacteriales;f__Crocinitomicaceae;g__Putridiphycobacter;s__
Aegir_M36_B57	2	55.17	1.724	68.74	1.03	0.37	6735	1121072	0.252507	0.0340351	0.000801953	1.05646	0.124102	0.0232974	0.564316	0.00320738	0	Bacteria	Campylobacterota	Campylobacteria	Campylobacterales	Sulfurovaceae	Sulfurovum		d__Bacteria;p__Campylobacterota;c__Campylobacteria;o__Campylobacterales;f__Sulfurovaceae;g__Sulfurovum;s__
Aegir_M36_B58	2	87.24	1.818	92.56	3.41	0.5	7963	3676637	0.00508355	0.00892905	0	0.0242596	0.0369091	0	0.0249705	0	0	Bacteria	Chloroflexota	Anaerolineae	Promineofilales	Promineofilaceae	S016-13		d__Bacteria;p__Chloroflexota;c__Anaerolineae;o__Promineofilales;f__Promineofilaceae;g__S016-13;s__
Aegir_M36_B59	1	90.69	1.23	95	0.33	0.289	64758	2294580	0.00910622	0.00219347	0	0.204912	0.00783955	0.00213201	0.349943	0	0	Bacteria	Bacteroidota	Bacteroidia	Flavobacteriales	Flavobacteriaceae	S010-17		d__Bacteria;p__Bacteroidota;c__Bacteroidia;o__Flavobacteriales;f__Flavobacteriaceae;g__S010-17;s__
Aegir_M36_B6	1	71.75	0.537	70.61	1.83	0.318	13298	2188004	0.0263383	0.00283896	0	0.287715	0.00708172	0.00740213	0.189554	0.014929	0	Bacteria	Bacteroidota	Bacteroidia	Flavobacteriales	Vicingaceae	GCA-002793235		d__Bacteria;p__Bacteroidota;c__Bacteroidia;o__Flavobacteriales;f__Vicingaceae;g__GCA-002793235;s__
Aegir_M36_B60	5	81.95	1.535	88.94	0.69	0.366	6237	3104661	0.0059414	0.0601159	0	0.0370275	0	0.00489677	0.127985	0.00445935	0	Bacteria	Pseudomonadota	Gammaproteobacteria	Beggiatoales	Beggiatoaceae	Thiomargarita		d__Bacteria;p__Pseudomonadota;c__Gammaproteobacteria;o__Beggiatoales;f__Beggiatoaceae;g__Thiomargarita;s__
Aegir_M36_B61	7	98.06	0.645	97.79	0.07	0.522	127398	3334007	0.0100347	0.00116774	0	0.141089	0	0	0.037588	0	0	Bacteria	Desulfobacterota	Desulfobacteria	Desulfobacterales	Desulfosarcinaceae			d__Bacteria;p__Desulfobacterota;c__Desulfobacteria;o__Desulfobacterales;f__Desulfosarcinaceae;g__;s__
Aegir_M36_B62	4	72.04	0.268	72.57	0.21	0.366	185434	2653462	0	0.00493429	0	0.19831	0	0.001437	0.00235626	0	0	Bacteria	Bacteroidota	Bacteroidia	Bacteroidales	UBA12170	UBA12170		d__Bacteria;p__Bacteroidota;c__Bacteroidia;o__Bacteroidales;f__UBA12170;g__UBA12170;s__
Aegir_M36_B63	4	98.78	0	98.98	0.03	0.431	64036	1928238	0.0376357	0.00144474	0.241105	0.145136	0	0	0	0	0	Bacteria	Pseudomonadota	Gammaproteobacteria	Thiomicrospirales	Thiomicrospiraceae	Thiomicrorhabdus		d__Bacteria;p__Pseudomonadota;c__Gammaproteobacteria;o__Thiomicrospirales;f__Thiomicrospiraceae;g__Thiomicrorhabdus;s__
Aegir_M36_B64	14	96.63	2.521	91.75	0.5	0.663	59404	5912724	0.00463378	0.00869556	0	0.0720127	0	0	0.0291784	0	0	Bacteria	Myxococcota	UBA796	UBA796	GCA-2862545	JACKEQ01		d__Bacteria;p__Myxococcota;c__UBA796;o__UBA796;f__GCA-2862545;g__JACKEQ01;s__
Aegir_M36_B65	3	96.12	0	97.71	0.51	0.277	55366	3077091	0.00640933	0	0	0.112881	0.0361043	0.0235941	0.0334006	0	0	Bacteria	Bacteroidota	Bacteroidia	Bacteroidales	JAADGE01	JAADGE01		d__Bacteria;p__Bacteroidota;c__Bacteroidia;o__Bacteroidales;f__JAADGE01;g__JAADGE01;s__
Aegir_M36_B66	2	94.26	2.732	99.18	0.41	0.289	26032	1873224	0	0.00521356	0	1.1313	0.0406745	0.00641938	0.0230468	0.00774711	0	Bacteria	Campylobacterota	Campylobacteria	Campylobacterales	Sulfurovaceae	SZUA-451		d__Bacteria;p__Campylobacterota;c__Campylobacteria;o__Campylobacterales;f__Sulfurovaceae;g__SZUA-451;s__
Aegir_M36_B67	2	67.67	1.58	61.68	1.06	0.397	3914	1514870	0.0190503	0.00343365	0.00165125	0.0557047	0	0.0255672	0.00647156	0	0	Bacteria	Pseudomonadota	Gammaproteobacteria	Methylococcales	Methylomonadaceae	Methyloprofundus		d__Bacteria;p__Pseudomonadota;c__Gammaproteobacteria;o__Methylococcales;f__Methylomonadaceae;g__Methyloprofundus;s__
Aegir_M36_B68	1	55.61	1.451	54.19	0.91	0.35	3646	1585265	0	0.0236002	0.0554987	0.020152	0	0	0.0649207	0	0	Bacteria	Bacteroidota	Bacteroidia	Bacteroidales	S143-33	S143-33		d__Bacteria;p__Bacteroidota;c__Bacteroidia;o__Bacteroidales;f__S143-33;g__S143-33;s__
Aegir_M36_B69	5	95.69	0.268	98.36	0.55	0.32	27316	3749375	0.0246945	0	0	0.779934	0.0151033	0.00284809	0.0100917	0	0	Bacteria	Bacteroidota	Bacteroidia	Flavobacteriales	Parvicellaceae	S010-51		d__Bacteria;p__Bacteroidota;c__Bacteroidia;o__Flavobacteriales;f__Parvicellaceae;g__S010-51;s__
Aegir_M36_B7	0	97.54	1.844	99.09	0.5	0.388	58395	1953258	0.00736093	0.0101606	0.00553714	1.48573	0	0.00927037	0	0	0	Bacteria	Campylobacterota	Campylobacteria	Campylobacterales	Sulfurovaceae	SZUA-451		d__Bacteria;p__Campylobacterota;c__Campylobacteria;o__Campylobacterales;f__Sulfurovaceae;g__SZUA-451;s__
Aegir_M36_B70	0	52.85	0	61.17	0.93	0.633	3942	2121992	0	0.0302927	0	0.021592	0	0	0.036591	0	0	Bacteria	Chloroflexota	Anaerolineae	B4-G1	B4-G1			d__Bacteria;p__Chloroflexota;c__Anaerolineae;o__B4-G1;f__B4-G1;g__;s__
Aegir_M36_B71	5	67.68	1.1	68.8	0.3	0.488	3610	1535988	0.105382	0.49098	0.183751	0.0201701	0	0	0.23131	0	0.00656731	Bacteria	Pseudomonadota	Gammaproteobacteria	Methylococcales	Methylomonadaceae	Methylomarinum		d__Bacteria;p__Pseudomonadota;c__Gammaproteobacteria;o__Methylococcales;f__Methylomonadaceae;g__Methylomarinum;s__
Aegir_M36_B72	2	98.79	0	97.94	0.7	0.4	26677	3252202	0.0060913	0.00415338	0	0.0671343	0	0.003013	0.0510109	0	0	Bacteria	Spirochaetota	Spirochaetia	B11-G9	B11-G9	S145-15		d__Bacteria;p__Spirochaetota;c__Spirochaetia;o__B11-G9;f__B11-G9;g__S145-15;s__
Aegir_M36_B73	4	82.56	2.068	82.63	0.01	0.38	7508	2020176	1.64642	0	0	0.0247449	0	0.154524	0	0	0	Bacteria	Pseudomonadota	Gammaproteobacteria	Methylococcales	Methylomonadaceae	WTBX01		d__Bacteria;p__Pseudomonadota;c__Gammaproteobacteria;o__Methylococcales;f__Methylomonadaceae;g__WTBX01;s__
Aegir_M36_B8	1	95.96	0.537	93.63	1.18	0.362	19997	3161356	0.00572654	0.00259731	0	0.0670168	0.00836121	0.00578919	0.0317276	0	0	Bacteria	Bacteroidota	Bacteroidia	Bacteroidales	UBA1556	CG2-30-33-31		d__Bacteria;p__Bacteroidota;c__Bacteroidia;o__Bacteroidales;f__UBA1556;g__CG2-30-33-31;s__
Aegir_M36_B9	5	85.8	1.512	86.01	0.19	0.392	32959	2494671	0.12937	0.0201704	0	0.17283	0.0150832	0.00998552	0.0376527	0	0	Bacteria	Pseudomonadota	Gammaproteobacteria	Methylococcales	Methylomonadaceae	Methyloprofundus		d__Bacteria;p__Pseudomonadota;c__Gammaproteobacteria;o__Methylococcales;f__Methylomonadaceae;g__Methyloprofundus;s__
Aegir_M37_B1	2	88.05	0.753	88.88	2.33	0.495	6161	2421700	0.0216492	0.000917089	0	0	0.0705256	0.00564829	0.00960323	0.0924466	0	Bacteria	Pseudomonadota	Alphaproteobacteria	Sphingomonadales	Emcibacteraceae	Paremcibacter		d__Bacteria;p__Pseudomonadota;c__Alphaproteobacteria;o__Sphingomonadales;f__Emcibacteraceae;g__Paremcibacter;s__
Aegir_M37_B10	3	69.43	1.571	72.88	2.16	0.338	5888	1729659	0.0497214	0.0273955	0	0.43854	0.593622	0.00297349	0.0083149	0.224946	0	Bacteria	Campylobacterota	Campylobacteria	Campylobacterales	Sulfurovaceae	UBA1140		d__Bacteria;p__Campylobacterota;c__Campylobacteria;o__Campylobacterales;f__Sulfurovaceae;g__UBA1140;s__
Aegir_M37_B11	3	69.89	3.496	68.06	2.49	0.367	5364	2086882	0	0	0	0	0.138764	0	0	0	0	Bacteria	Omnitrophota	Koll11	Zapsychrales	Zapsychraceae			d__Bacteria;p__Omnitrophota;c__Koll11;o__Zapsychrales;f__Zapsychraceae;g__;s__
Aegir_M37_B12	2	85.7	1.39	83.75	0.02	0.395	10746	2395217	0.287064	0.15026	0	1.34136	0.389841	0.0130869	1.04293	0	0	Bacteria	Pseudomonadota	Gammaproteobacteria	Methylococcales	Methylomonadaceae	Methyloprofundus	Methyloprofundus sp900128525	d__Bacteria;p__Pseudomonadota;c__Gammaproteobacteria;o__Methylococcales;f__Methylomonadaceae;g__Methyloprofundus;s__Methyloprofundus sp900128525
Aegir_M37_B13	1	96.42	0	95.26	0.02	0.411	118337	2052444	0	0	0	0	0.290669	0	0	0.00094857	0	Bacteria	Caldisericota	Caldisericia	JAAYUI01	JAAYUI01			d__Bacteria;p__Caldisericota;c__Caldisericia;o__JAAYUI01;f__JAAYUI01;g__;s__
Aegir_M37_B14	4	62.06	1.724	70.11	2.16	0.407	8582	1909504	0.096786	0.0163704	0	0.0313862	0.15315	0.00718957	0.0382003	0.0113091	0	Bacteria	Pseudomonadota	Gammaproteobacteria	Methylococcales	Methylomonadaceae	Methyloprofundus		d__Bacteria;p__Pseudomonadota;c__Gammaproteobacteria;o__Methylococcales;f__Methylomonadaceae;g__Methyloprofundus;s__
Aegir_M37_B15	2	79.66	5.772	81.55	5.36	0.515	4974	2603274	0	0	0	0	0.0820031	0.00265992	0.0014227	0.00121542	0	Bacteria	PUNC01	PUNC01	PUNC01	PWXJ01			d__Bacteria;p__PUNC01;c__PUNC01;o__PUNC01;f__PWXJ01;g__;s__
Aegir_M37_B16	3	56.42	4.89	54.01	4.52	0.425	3752	1424663	0.0524752	0.00124598	0	0	0.0807594	0	0.0101802	0.0788859	0	Bacteria	Pseudomonadota	Gammaproteobacteria	Methylococcales	Cycloclasticaceae	Cycloclasticus		d__Bacteria;p__Pseudomonadota;c__Gammaproteobacteria;o__Methylococcales;f__Cycloclasticaceae;g__Cycloclasticus;s__
Aegir_M37_B17	7	92.98	2.241	93.42	3.94	0.42	20805	3363445	0.0260569	0.00772605	0	0	0.893023	0.00552569	0.0599235	0.0859667	0	Bacteria	Pseudomonadota	Gammaproteobacteria	Methylococcales	Methylomonadaceae	Methyloprofundus		d__Bacteria;p__Pseudomonadota;c__Gammaproteobacteria;o__Methylococcales;f__Methylomonadaceae;g__Methyloprofundus;s__
Aegir_M37_B18	0	62.37	1.775	62.14	0.61	0.489	4191	1646728	0	0	0	0	0.0565429	0	0	0.00251008	0	Bacteria	Pseudomonadota	Alphaproteobacteria	Rhizobiales	Devosiaceae	DROE01		d__Bacteria;p__Pseudomonadota;c__Alphaproteobacteria;o__Rhizobiales;f__Devosiaceae;g__DROE01;s__
Aegir_M37_B19	3	84.22	1.136	88.47	0.5	0.573	6829	2451844	0	0	0	0	0.251503	0	0.00203387	0	0	Bacteria	Planctomycetota	Phycisphaerae	Phycisphaerales	Phycisphaeraceae			d__Bacteria;p__Planctomycetota;c__Phycisphaerae;o__Phycisphaerales;f__Phycisphaeraceae;g__;s__
Aegir_M37_B2	2	68.13	3.478	77.16	2.06	0.516	4415	1493195	0	0	0	0	0.0829338	0	0	0	0	Bacteria	UBA10199	UBA10199	2-02-FULL-44-16	JAAZCA01			d__Bacteria;p__UBA10199;c__UBA10199;o__2-02-FULL-44-16;f__JAAZCA01;g__;s__
Aegir_M37_B20	1	66.33	0	94.57	1.15	0.325	60821	989423	0	0	0	0	0.2565	0	0	0	0	Bacteria	Patescibacteria	Paceibacteria	Moranbacterales	UBA2193			d__Bacteria;p__Patescibacteria;c__Paceibacteria;o__Moranbacterales;f__UBA2193;g__;s__
Aegir_M37_B21	8	93.33	3.448	95.17	0.57	0.463	13407	3280794	0	0	0	0	0.0644729	0.00200038	0.0603748	0.0075187	0	Bacteria	Pseudomonadota	Gammaproteobacteria	Methylococcales				d__Bacteria;p__Pseudomonadota;c__Gammaproteobacteria;o__Methylococcales;f__;g__;s__
Aegir_M37_B22	9	92.64	2.18	98.19	1.99	0.394	17937	3695739	0	0.0010393	0	0	0.133071	0	0	0.0245573	0	Bacteria	Pseudomonadota	Gammaproteobacteria	Thiotrichales	Thiotrichaceae	HyVt-477		d__Bacteria;p__Pseudomonadota;c__Gammaproteobacteria;o__Thiotrichales;f__Thiotrichaceae;g__HyVt-477;s__
Aegir_M37_B23	6	71.25	5.024	70.94	6.23	0.551	3855	2718893	0	0.000915753	0	0.00607102	0.332804	0.00181951	0.0220717	0.0149333	0	Bacteria	Verrucomicrobiota	Kiritimatiellia	Kiritimatiellales	Pontiellaceae	Pontiella		d__Bacteria;p__Verrucomicrobiota;c__Kiritimatiellia;o__Kiritimatiellales;f__Pontiellaceae;g__Pontiella;s__
Aegir_M37_B24	2	73.25	2.727	73.5	1.63	0.432	4272	1932808	0	0	0	0	0.116934	0	0	0.00452008	0	Bacteria	Chloroflexota	Anaerolineae	Anaerolineales	Anaerolineaceae	SpSt-1165		d__Bacteria;p__Chloroflexota;c__Anaerolineae;o__Anaerolineales;f__Anaerolineaceae;g__SpSt-1165;s__
Aegir_M37_B25	1	84.91	1.785	88.12	2.79	0.351	6146	2858635	0.536132	0.00206451	0	0.18383	0.0645213	0.0133808	0.0729102	0.00843401	0	Bacteria	Bacteroidota	Bacteroidia	Cytophagales	Cyclobacteriaceae	JAKISE01		d__Bacteria;p__Bacteroidota;c__Bacteroidia;o__Cytophagales;f__Cyclobacteriaceae;g__JAKISE01;s__
Aegir_M37_B26	1	88.13	1.694	89.94	1.16	0.531	19338	2112695	0	0	0	0	0.287083	0	0	0.000957316	0	Bacteria	Bipolaricaulota	Bipolaricaulia	UBA7950	UBA9294	SPBW01		d__Bacteria;p__Bipolaricaulota;c__Bipolaricaulia;o__UBA7950;f__UBA9294;g__SPBW01;s__
Aegir_M37_B27	5	78.57	6.079	75.23	7.11	0.465	7458	4166642	0	0	0	0	0.0737124	0	0	0.00170278	0	Bacteria	Bacteroidota	Bacteroidia	Bacteroidales	GCA-2748055	GCA-2748055		d__Bacteria;p__Bacteroidota;c__Bacteroidia;o__Bacteroidales;f__GCA-2748055;g__GCA-2748055;s__
Aegir_M37_B28	1	81.58	2.473	87.33	2.42	0.505	7142	2890159	0	0	0	0	0.848712	0	0.00261458	0.0136495	0	Bacteria	Desulfobacterota	DSM-4660	Desulfatiglandales	Desulfatiglandaceae	NaphS2		d__Bacteria;p__Desulfobacterota;c__DSM-4660;o__Desulfatiglandales;f__Desulfatiglandaceae;g__NaphS2;s__
Aegir_M37_B29	2	95.12	0.152	94.75	0.22	0.367	40971	3253489	0.00320948	0	0	0	0.24774	0	0	0.0353468	0	Bacteria	Pseudomonadota	Gammaproteobacteria	Xanthomonadales	Marinicellaceae	NORP309		d__Bacteria;p__Pseudomonadota;c__Gammaproteobacteria;o__Xanthomonadales;f__Marinicellaceae;g__NORP309;s__
Aegir_M37_B3	1	98.86	0.103	96.2	0	0.467	23704	3171026	0	0	0	0	0.16851	0	0	0	0	Bacteria	Planctomycetota	Phycisphaerae	Sedimentisphaerales	SM23-30			d__Bacteria;p__Planctomycetota;c__Phycisphaerae;o__Sedimentisphaerales;f__SM23-30;g__;s__
Aegir_M37_B30	5	97.57	0.495	93.19	0	0.36	22337	4065168	0	0	0	0	0.160396	0	0	0.0148346	0	Bacteria	Bacteroidota	Bacteroidia	Flavobacteriales	Flavobacteriaceae	Maribacter_C		d__Bacteria;p__Bacteroidota;c__Bacteroidia;o__Flavobacteriales;f__Flavobacteriaceae;g__Maribacter_C;s__
Aegir_M37_B31	0	91.21	0.705	93.94	0.01	0.365	17534	2262353	0.00829951	0.00137095	0	0.00797818	0.214807	0.00791118	0.0112264	0.00317252	0	Bacteria	Campylobacterota	Campylobacteria	Campylobacterales	QNZT01	JANTGR01		d__Bacteria;p__Campylobacterota;c__Campylobacteria;o__Campylobacterales;f__QNZT01;g__JANTGR01;s__
Aegir_M37_B32	4	78.39	1.597	81.37	0.57	0.556	14828	3726096	0	0	0	0	0.0865913	0	0	0.00456872	0	Bacteria	Pseudomonadota	Alphaproteobacteria	Rhodobacterales	Rhodobacteraceae	NORP181		d__Bacteria;p__Pseudomonadota;c__Alphaproteobacteria;o__Rhodobacterales;f__Rhodobacteraceae;g__NORP181;s__
Aegir_M37_B33	0	62.87	0	72.02	0.5	0.387	15383	836519	0	0	0	0	0.0889417	0	0	0	0	Bacteria	Patescibacteria	Gracilibacteria	UBA1369	UBA1369			d__Bacteria;p__Patescibacteria;c__Gracilibacteria;o__UBA1369;f__UBA1369;g__;s__
Aegir_M37_B34	1	90.14	2.272	79.73	1.16	0.588	7082	5156623	0	0	0	0	0.0767795	0	0	0	0	Bacteria	Planctomycetota	Phycisphaerae	Sedimentisphaerales	SG8-4	PLanc-01		d__Bacteria;p__Planctomycetota;c__Phycisphaerae;o__Sedimentisphaerales;f__SG8-4;g__PLanc-01;s__
Aegir_M37_B35	2	68.96	0	64.85	0.88	0.303	7480	1983956	0.0193449	0.0272171	0	0	0.376821	0.00980577	0.0318028	0.168058	0	Bacteria	Bacteroidota	Bacteroidia	Flavobacteriales	Flavobacteriaceae	Lutimonas		d__Bacteria;p__Bacteroidota;c__Bacteroidia;o__Flavobacteriales;f__Flavobacteriaceae;g__Lutimonas;s__
Aegir_M37_B36	2	81.66	0.922	80.07	0.03	0.321	47134	2569390	0	0.00657171	0	0	0.190054	0.00953301	0.0350128	0.0977902	0	Bacteria	Bacteroidota	Bacteroidia	Flavobacteriales	Flavobacteriaceae	Lutimonas		d__Bacteria;p__Bacteroidota;c__Bacteroidia;o__Flavobacteriales;f__Flavobacteriaceae;g__Lutimonas;s__
Aegir_M37_B37	4	57.49	2.669	48.95	4.1	0.571	3113	1889110	0	0	0	0	0.125116	0	0	0	0	Bacteria	Verrucomicrobiota	Kiritimatiellia	LD1-PB3_B	Lenti-01	Lenti-01		d__Bacteria;p__Verrucomicrobiota;c__Kiritimatiellia;o__LD1-PB3_B;f__Lenti-01;g__Lenti-01;s__
Aegir_M37_B38	1	99.93	1.075	94.66	0.19	0.491	130692	2697817	0	0	0	0	0.249096	0	0	0	0	Bacteria	Planctomycetota	SZUA-567	SZUA-567	JAFGNG01	JAFGNG01		d__Bacteria;p__Planctomycetota;c__SZUA-567;o__SZUA-567;f__JAFGNG01;g__JAFGNG01;s__
Aegir_M37_B39	5	57.39	6.448	65.33	3.34	0.532	3491	2004481	0.00899092	0.00102992	0	0	0.0623727	0	0	0.0174702	0	Bacteria	Pseudomonadota	Alphaproteobacteria	Rhodobacterales	Rhodobacteraceae	Profundibacter		d__Bacteria;p__Pseudomonadota;c__Alphaproteobacteria;o__Rhodobacterales;f__Rhodobacteraceae;g__Profundibacter;s__
Aegir_M37_B4	0	60	4.098	64.63	4.22	0.335	4030	2137063	0.0137699	0.00731146	0	0.483801	0.10073	0.00808268	0.0206947	0.0369505	0	Bacteria	Campylobacterota	Campylobacteria	Campylobacterales	Sulfurovaceae	UBA1140		d__Bacteria;p__Campylobacterota;c__Campylobacteria;o__Campylobacterales;f__Sulfurovaceae;g__UBA1140;s__
Aegir_M37_B40	5	95.05	2.197	95.6	0.24	0.368	53946	3257184	0	0	0	0	0.623137	0	0.00207173	0.00392208	0	Bacteria	Fermentibacterota	Fermentibacteria	Fermentibacterales	Fermentibacteraceae	Sabulitectum		d__Bacteria;p__Fermentibacterota;c__Fermentibacteria;o__Fermentibacterales;f__Fermentibacteraceae;g__Sabulitectum;s__
Aegir_M37_B41	5	95.69	1.093	98.77	0.98	0.376	24866	3620776	0.00716813	0.00678796	0	0.00850759	0.150076	0.00351453	0.0282772	0.00379733	0	Bacteria	Bacteroidota	Bacteroidia	Bacteroidales	F082	B16-G9		d__Bacteria;p__Bacteroidota;c__Bacteroidia;o__Bacteroidales;f__F082;g__B16-G9;s__
Aegir_M37_B42	3	70.28	3.132	68.71	4.16	0.397	18276	2016571	0.107721	0	0	0	0.202213	0	0	0.00480336	0	Bacteria	Pseudomonadota	Gammaproteobacteria	Thiotrichales	Thiotrichaceae	Cocleimonas		d__Bacteria;p__Pseudomonadota;c__Gammaproteobacteria;o__Thiotrichales;f__Thiotrichaceae;g__Cocleimonas;s__
Aegir_M37_B43	1	54.48	1.724	55.59	0.21	0.363	6816	1077485	0.35235	0.00516669	0	0.215836	0.560192	0.0163524	0.0395295	0.00600164	0	Bacteria	Campylobacterota	Campylobacteria	Campylobacterales	Sulfurovaceae	Sulfurovum		d__Bacteria;p__Campylobacterota;c__Campylobacteria;o__Campylobacterales;f__Sulfurovaceae;g__Sulfurovum;s__
Aegir_M37_B44	0	51.63	2.179	53.91	0.1	0.33	7513	1045085	0.052702	0.00559434	0.00689802	0.446819	0.111244	0.0251929	0.0563525	0	0	Bacteria	Campylobacterota	Campylobacteria	Campylobacterales	Sulfurospirillaceae	Sulfurospirillum_A		d__Bacteria;p__Campylobacterota;c__Campylobacteria;o__Campylobacterales;f__Sulfurospirillaceae;g__Sulfurospirillum_A;s__
Aegir_M37_B45	0	92.11	2.8	79.68	2.55	0.471	8075	3255710	0	0	0	0	0.0730915	0	0.00821019	0.000969575	0	Bacteria	Spirochaetota	Spirochaetia	Spirochaetales_E	Spirochaetaceae_B	UBA2779		d__Bacteria;p__Spirochaetota;c__Spirochaetia;o__Spirochaetales_E;f__Spirochaetaceae_B;g__UBA2779;s__
Aegir_M37_B46	2	62.06	0	82.8	0.79	0.568	36487	2483454	0	0.000851463	0	0	0.116989	0	0	0.00683827	0	Bacteria	Pseudomonadota	Alphaproteobacteria	Rhodobacterales	Rhodobacteraceae	Profundibacter		d__Bacteria;p__Pseudomonadota;c__Alphaproteobacteria;o__Rhodobacterales;f__Rhodobacteraceae;g__Profundibacter;s__
Aegir_M37_B47	6	94.1	1.995	86.55	0.86	0.422	19806	2096688	0.145661	0.0048264	0	0.0293635	0.122215	0.0138776	0.0111428	0.0652016	0	Bacteria	Pseudomonadota	Gammaproteobacteria	Nitrosococcales	Methylophagaceae	GCA-002733105		d__Bacteria;p__Pseudomonadota;c__Gammaproteobacteria;o__Nitrosococcales;f__Methylophagaceae;g__GCA-002733105;s__
Aegir_M37_B48	0	58.87	0.071	65.68	0.1	0.28	13974	580892	0	0	0	0	0.0957253	0	0	0	0	Archaea	Nanoarchaeota	Nanoarchaeia	Woesearchaeales	BS150m-G63	JAGLOT01		d__Archaea;p__Nanoarchaeota;c__Nanoarchaeia;o__Woesearchaeales;f__BS150m-G63;g__JAGLOT01;s__
Aegir_M37_B49	3	51.06	0.204	52.85	1.61	0.443	3641	2516236	0	0	0	0	0.0748626	0	0	0	0	Bacteria	Spirochaetota	UBA4802	UBA4802	UBA5550			d__Bacteria;p__Spirochaetota;c__UBA4802;o__UBA4802;f__UBA5550;g__;s__
Aegir_M37_B5	3	63.79	1.724	72.78	1.93	0.353	7312	3569912	0	0	0	0	0.104658	0	0.00361865	0	0	Bacteria	UBA3054	UBA3054	UBA3054	B51-G9			d__Bacteria;p__UBA3054;c__UBA3054;o__UBA3054;f__B51-G9;g__;s__
Aegir_M37_B50	3	56.77	4.917	52.27	3.18	0.529	3114	2460485	0.0122787	0.00255896	0	0	0.368089	0.00582704	0.0334693	0.0292522	0	Bacteria	Pseudomonadota	Gammaproteobacteria	Pseudomonadales	Halieaceae	Halioglobus		d__Bacteria;p__Pseudomonadota;c__Gammaproteobacteria;o__Pseudomonadales;f__Halieaceae;g__Halioglobus;s__
Aegir_M37_B51	1	79.78	1.686	86.46	4.6	0.365	4690	2856029	0.0139923	0.0008153	0	0	0.102119	0	0	0.0145642	0	Bacteria	Bacteroidota	Bacteroidia	Cytophagales	Cyclobacteriaceae			d__Bacteria;p__Bacteroidota;c__Bacteroidia;o__Cytophagales;f__Cyclobacteriaceae;g__;s__
Aegir_M37_B52	0	62.93	6.37	53.49	6.38	0.356	3301	2614074	0	0	0	0.00675242	0.161929	0.00178335	0.00241783	0.00656886	0	Bacteria	Spirochaetota	Spirochaetia	B11-G9	B11-G9	JAJRQE01		d__Bacteria;p__Spirochaetota;c__Spirochaetia;o__B11-G9;f__B11-G9;g__JAJRQE01;s__
Aegir_M37_B53	1	51.72	0	62.1	0.53	0.323	28805	1827723	0.0767994	0.00230524	0	0.202205	0.121915	0.00673027	0.0931907	0.0179171	0	Bacteria	Bacteroidota	Bacteroidia	Flavobacteriales	Vicingaceae	GCA-002793235		d__Bacteria;p__Bacteroidota;c__Bacteroidia;o__Flavobacteriales;f__Vicingaceae;g__GCA-002793235;s__
Aegir_M37_B54	2	63.56	1.825	79.45	0.61	0.347	5139	1983843	0	0	0	0	0.187783	0	0	0	0	Bacteria	Bacteroidota	Bacteroidia	Bacteroidales	GCA-2711565	GCA-2711565		d__Bacteria;p__Bacteroidota;c__Bacteroidia;o__Bacteroidales;f__GCA-2711565;g__GCA-2711565;s__
Aegir_M37_B55	6	93.3	5.128	91.69	2.36	0.618	7444	5095888	0	0	0	0	0.0818071	0	0	0	0	Bacteria	Acidobacteriota	Thermoanaerobaculia	Thermoanaerobaculales	Sulfomarinibacteraceae	JAHECW01		d__Bacteria;p__Acidobacteriota;c__Thermoanaerobaculia;o__Thermoanaerobaculales;f__Sulfomarinibacteraceae;g__JAHECW01;s__
Aegir_M37_B56	4	98.29	0.632	95.29	4.87	0.439	12897	3914966	0	0	0	0	0.156212	0.00115581	0.00515722	0	0	Bacteria	Desulfobacterota	Desulfobacteria	Desulfobacterales	Desulfosalsimonadaceae	SURF-3		d__Bacteria;p__Desulfobacterota;c__Desulfobacteria;o__Desulfobacterales;f__Desulfosalsimonadaceae;g__SURF-3;s__
Aegir_M37_B6	7	97.03	3.151	97	0.06	0.427	51006	3024622	0.0057624	0.00107892	0	0	0.199933	0	0	0.0150164	0	Bacteria	Pseudomonadota	Gammaproteobacteria	CAJXQU01	CAJXQU01	CAJXQU01		d__Bacteria;p__Pseudomonadota;c__Gammaproteobacteria;o__CAJXQU01;f__CAJXQU01;g__CAJXQU01;s__
Aegir_M37_B7	6	56.89	8.74	55.54	8.02	0.613	3244	6164684	0	0	0	0	0.0782386	0	0	0	0	Bacteria	Myxococcota	Polyangia	Polyangiales	SG8-38			d__Bacteria;p__Myxococcota;c__Polyangia;o__Polyangiales;f__SG8-38;g__;s__
Aegir_M37_B8	2	84.04	5.818	89.87	10.21	0.498	6565	3599511	0.0038441	0.00604828	0	0.0171676	0.0873297	0	0.0198819	0	0	Bacteria	Chloroflexota	Anaerolineae	Promineofilales	Promineofilaceae	S016-13		d__Bacteria;p__Chloroflexota;c__Anaerolineae;o__Promineofilales;f__Promineofilaceae;g__S016-13;s__
Aegir_M37_B9	7	74.88	1.781	76.68	0	0.411	25475	2711390	0.263507	0.0117193	0	0	0.609231	0.00991024	0.104881	0.0305982	0	Bacteria	Pseudomonadota	Gammaproteobacteria	Methylococcales	Methylomonadaceae	QPIN01		d__Bacteria;p__Pseudomonadota;c__Gammaproteobacteria;o__Methylococcales;f__Methylomonadaceae;g__QPIN01;s__
Aegir_M38_B1	1	78.69	2.915	70	3.45	0.335	17802	1514949	0.0331058	0.00713439	0.0148821	0.00409823	0.0300752	1.0771	0.0153161	0.00285834	0	Bacteria	Campylobacterota	Campylobacteria	Campylobacterales	Sulfurimonadaceae	Sulfurimonas		d__Bacteria;p__Campylobacterota;c__Campylobacteria;o__Campylobacterales;f__Sulfurimonadaceae;g__Sulfurimonas;s__
Aegir_M38_B10	7	60.25	1.426	67.58	0.51	0.381	5496	1696477	0.0123191	0	0	0	0	0.0407499	0.00944735	0.00726843	0	Bacteria	Pseudomonadota	Gammaproteobacteria	Methylococcales	Methylomonadaceae	QPIN01		d__Bacteria;p__Pseudomonadota;c__Gammaproteobacteria;o__Methylococcales;f__Methylomonadaceae;g__QPIN01;s__
Aegir_M38_B100	0	86.11	1.069	91.05	0.65	0.504	11512	1718725	0	0	0	0	0	0.048011	0	0	0	Bacteria	Actinomycetota	CAJVYJ01	CAJVYJ01				d__Bacteria;p__Actinomycetota;c__CAJVYJ01;o__CAJVYJ01;f__;g__;s__
Aegir_M38_B101	2	99.35	1.158	98.91	0.44	0.422	67672	3146397	0	0	0	0	0	0.970559	0	0	0	Bacteria	Pseudomonadota	Gammaproteobacteria	Enterobacterales_A	Kangiellaceae	GCA-002733465		d__Bacteria;p__Pseudomonadota;c__Gammaproteobacteria;o__Enterobacterales_A;f__Kangiellaceae;g__GCA-002733465;s__
Aegir_M38_B102	1	98.38	0	100	0.86	0.328	26418	3785650	0	0	0	0.0253142	0	0.0648155	0	0	0	Bacteria	Bacteroidota	Bacteroidia	Bacteroidales	JAADGE01			d__Bacteria;p__Bacteroidota;c__Bacteroidia;o__Bacteroidales;f__JAADGE01;g__;s__
Aegir_M38_B103	8	93.54	2.706	93.12	1.62	0.437	10375	4530495	0	0	0	0	0	0.0455361	0	0	0	Bacteria	Bacteroidota	Bacteroidia	UBA10329	UBA10329			d__Bacteria;p__Bacteroidota;c__Bacteroidia;o__UBA10329;f__UBA10329;g__;s__
Aegir_M38_B104	3	96.24	0	95.51	0.05	0.503	50396	3103887	0.00244013	0	0	0	0.00555593	0.162348	0.00904305	0	0	Bacteria	Pseudomonadota	Alphaproteobacteria	Sphingomonadales	Emcibacteraceae	Paremcibacter		d__Bacteria;p__Pseudomonadota;c__Alphaproteobacteria;o__Sphingomonadales;f__Emcibacteraceae;g__Paremcibacter;s__
Aegir_M38_B105	3	98.77	1.247	99.9	0.13	0.377	24190	2167418	0	0	0	0	0	0.344383	0	0	0	Bacteria	Campylobacterota	Campylobacteria	Campylobacterales	Sulfurovaceae	Sulfurovum		d__Bacteria;p__Campylobacterota;c__Campylobacteria;o__Campylobacterales;f__Sulfurovaceae;g__Sulfurovum;s__
Aegir_M38_B106	1	89.73	1.748	91.41	1.8	0.36	7635	2724666	0	0	0	0	0	0.0410059	0	0	0	Bacteria	Zixibacteria	MSB-5A5	GN15	40940	QQUK01		d__Bacteria;p__Zixibacteria;c__MSB-5A5;o__GN15;f__FEB-12;g__QQUK01;s__
Aegir_M38_B107	0	58.77	0	70.2	0.99	0.302	51580	1602043	0.0076694	0	0	0	0	0.106737	0	0.00618227	0	Bacteria	Bacteroidota	Bacteroidia	Flavobacteriales	Flavobacteriaceae	Lutibacter		d__Bacteria;p__Bacteroidota;c__Bacteroidia;o__Flavobacteriales;f__Flavobacteriaceae;g__Lutibacter;s__
Aegir_M38_B108	0	84.05	1.891	80.47	2.73	0.314	13478	3286109	0.0146135	0	0	0	0	0.261742	0	0.00768291	0	Bacteria	Bacteroidota	Bacteroidia	Flavobacteriales	Crocinitomicaceae	Putridiphycobacter		d__Bacteria;p__Bacteroidota;c__Bacteroidia;o__Flavobacteriales;f__Crocinitomicaceae;g__Putridiphycobacter;s__
Aegir_M38_B109	1	88.77	1.457	87.63	0.3	0.32	35384	2518258	0.00640713	0.00137962	0	0	0.0132066	0.638982	0.00886554	0.0323757	0	Bacteria	Bacteroidota	Bacteroidia	Flavobacteriales	Flavobacteriaceae	GCA-002733185		d__Bacteria;p__Bacteroidota;c__Bacteroidia;o__Flavobacteriales;f__Flavobacteriaceae;g__GCA-002733185;s__
Aegir_M38_B11	0	55.95	1.724	48.6	2.42	0.373	3254	1266413	0.0109563	0	0	0	0	0.0374992	0	0	0	Bacteria	Pseudomonadota	Gammaproteobacteria	GCA-001735895				d__Bacteria;p__Pseudomonadota;c__Gammaproteobacteria;o__GCA-001735895;f__;g__;s__
Aegir_M38_B12	0	52.87	0.614	51.25	1.27	0.376	3481	1039383	0.152017	0.000915185	0	0	0	0.0268793	0	0.0514817	0	Bacteria	Campylobacterota	Campylobacteria	Campylobacterales	Sulfurovaceae	Sulfurovum		d__Bacteria;p__Campylobacterota;c__Campylobacteria;o__Campylobacterales;f__Sulfurovaceae;g__Sulfurovum;s__
Aegir_M38_B13	3	92.79	1.219	92.92	0.28	0.398	92114	2443408	0	0	0	0	0	0.0846062	0	0	0	Bacteria	Pseudomonadota	Gammaproteobacteria	Chromatiales	Sedimenticolaceae			d__Bacteria;p__Pseudomonadota;c__Gammaproteobacteria;o__Chromatiales;f__Sedimenticolaceae;g__;s__
Aegir_M38_B14	1	55.8	2.521	47.04	1.08	0.43	3401	1104746	0.0252263	0	0	0	0	0.0394672	0	0	0	Bacteria	Pseudomonadota	Zetaproteobacteria	Mariprofundales	Mariprofundaceae	Ghiorsea		d__Bacteria;p__Pseudomonadota;c__Zetaproteobacteria;o__Mariprofundales;f__Mariprofundaceae;g__Ghiorsea;s__
Aegir_M38_B15	2	54.04	3.323	50.65	2.24	0.354	3690	1494268	0.0197345	0	0	0	0	0.0336607	0	0	0	Bacteria	Planctomycetota	JADGBV01	JADGBV01	JADGBV01			d__Bacteria;p__Planctomycetota;c__JADGBV01;o__JADGBV01;f__JADGBV01;g__;s__
Aegir_M38_B16	1	50.31	0	60.51	2.02	0.264	8581	1271699	0	0	0	0	0	0.0627935	0	0	0	Archaea	Nanoarchaeota	Nanoarchaeia	Woesearchaeales	UBA583	UBA583		d__Archaea;p__Nanoarchaeota;c__Nanoarchaeia;o__Woesearchaeales;f__UBA583;g__UBA583;s__
Aegir_M38_B17	0	96.74	0.424	99.85	0	0.309	34270	1553934	0	0	0	0	0	0.302049	0	0	0	Bacteria	Campylobacterota	Campylobacteria	Campylobacterales	Arcobacteraceae	JAIOSF01		d__Bacteria;p__Campylobacterota;c__Campylobacteria;o__Campylobacterales;f__Arcobacteraceae;g__JAIOSF01;s__
Aegir_M38_B18	1	64.59	2.459	60.33	0.73	0.341	15891	1233729	0.0116866	0.00181388	0	0.00368844	0.00491752	0.13014	0.00529848	0	0	Bacteria	Campylobacterota	Campylobacteria	Campylobacterales	Sulfurimonadaceae	Sulfurimonas		d__Bacteria;p__Campylobacterota;c__Campylobacteria;o__Campylobacterales;f__Sulfurimonadaceae;g__Sulfurimonas;s__
Aegir_M38_B19	3	91.51	2.1	87.35	2.21	0.485	14383	2114358	0	0	0	0	0	0.440382	0	0	0	Bacteria	Pseudomonadota	Zetaproteobacteria	Mariprofundales	Mariprofundaceae	AB-137-C09		d__Bacteria;p__Pseudomonadota;c__Zetaproteobacteria;o__Mariprofundales;f__Mariprofundaceae;g__AB-137-C09;s__
Aegir_M38_B2	2	59.12	9.482	68.65	8.52	0.577	4048	2588339	0	0	0	0	0	0.049855	0	0	0	Bacteria	Pseudomonadota	Alphaproteobacteria	Rhodobacterales	Rhodobacteraceae	UBA5972		d__Bacteria;p__Pseudomonadota;c__Alphaproteobacteria;o__Rhodobacterales;f__Rhodobacteraceae;g__UBA5972;s__
Aegir_M38_B20	1	58.81	0	62.85	1	0.618	4582	2100390	0	0	0	0	0	0.0414766	0	0	0	Bacteria	Chloroflexota	Anaerolineae	JAAYZQ01	JAAYZQ01			d__Bacteria;p__Chloroflexota;c__Anaerolineae;o__JAAYZQ01;f__JAAYZQ01;g__;s__
Aegir_M38_B21	6	95.6	0.908	99.28	0.65	0.381	24150	3500062	0.261826	0.0148974	0	0.0256446	0.0373308	0.181906	0.169316	0.0702604	0	Bacteria	Pseudomonadota	Gammaproteobacteria	Methylococcales	Methylomonadaceae	QPIN01		d__Bacteria;p__Pseudomonadota;c__Gammaproteobacteria;o__Methylococcales;f__Methylomonadaceae;g__QPIN01;s__
Aegir_M38_B22	6	81.01	0.264	76.88	0.22	0.398	30494	1773673	0.0118485	0	0	0	0.00961594	0.245496	0.00570326	0.104527	0	Bacteria	Pseudomonadota	Gammaproteobacteria	Nitrosococcales	Methylophagaceae	GCA-002733105		d__Bacteria;p__Pseudomonadota;c__Gammaproteobacteria;o__Nitrosococcales;f__Methylophagaceae;g__GCA-002733105;s__
Aegir_M38_B23	5	97.73	3.296	95.96	0.28	0.451	22369	3688441	0.0115241	0.000927975	0	0.0365274	0	0.0392992	0.0483395	0.00100731	0	Bacteria	Calditrichota	Calditrichia	Calditrichales	Calditrichaceae	JANTFQ01		d__Bacteria;p__Calditrichota;c__Calditrichia;o__Calditrichales;f__Calditrichaceae;g__JANTFQ01;s__
Aegir_M38_B24	0	82.33	5.045	85.47	4.03	0.394	6230	2612372	0.201351	0.00110983	0	0	0	0.0305793	0.00186688	0	0	Bacteria	Pseudomonadota	Gammaproteobacteria	Enterobacterales_A	Kangiellaceae	GCA-002733465		d__Bacteria;p__Pseudomonadota;c__Gammaproteobacteria;o__Enterobacterales_A;f__Kangiellaceae;g__GCA-002733465;s__
Aegir_M38_B25	3	84.32	1.351	83.32	0.45	0.35	16111	2462959	0.0291806	0.00221604	0	0.0114902	0.014538	0.0387801	0.00244664	0.00401703	0	Bacteria	Bacteroidota	Bacteroidia	Flavobacteriales	Crocinitomicaceae	UBA4466		d__Bacteria;p__Bacteroidota;c__Bacteroidia;o__Flavobacteriales;f__Crocinitomicaceae;g__UBA4466;s__
Aegir_M38_B26	5	89.13	0.172	94.8	0.04	0.362	22893	2125051	0	0.00117161	0	0.0105374	0	0.437584	0	0	0	Bacteria	Pseudomonadota	Gammaproteobacteria	Methylococcales	Methylomonadaceae	Methyloprofundus		d__Bacteria;p__Pseudomonadota;c__Gammaproteobacteria;o__Methylococcales;f__Methylomonadaceae;g__Methyloprofundus;s__
Aegir_M38_B27	0	51.72	0	40.25	0.34	0.333	64559	1371032	0.0795895	0.0092101	0	0.0231584	0.0296724	0.0325926	0.212231	0.0407467	0	Bacteria	Bacteroidota	Bacteroidia	Flavobacteriales	Flavobacteriaceae	GCA-002733185		d__Bacteria;p__Bacteroidota;c__Bacteroidia;o__Flavobacteriales;f__Flavobacteriaceae;g__GCA-002733185;s__
Aegir_M38_B28	3	78.53	3.16	78.71	2.26	0.428	8553	2418530	0.0211626	0.000592537	0	0	0.00352134	0.0578521	0	0.0393932	0	Bacteria	Pseudomonadota	Gammaproteobacteria	SZUA-229	SZUA-229	S010-25		d__Bacteria;p__Pseudomonadota;c__Gammaproteobacteria;o__SZUA-229;f__SZUA-229;g__S010-25;s__
Aegir_M38_B29	2	69.69	6.757	67.42	6.79	0.597	5757	3464312	0	0	0	0	0.00275717	0.0417718	0	0	0	Bacteria	Krumholzibacteriota	Krumholzibacteria	LZORAL124-64-63	LZORAL124-64-63	JAGRNP01		d__Bacteria;p__Krumholzibacteriota;c__Krumholzibacteria;o__LZORAL124-64-63;f__LZORAL124-64-63;g__JAGRNP01;s__
Aegir_M38_B3	1	54.38	0	36.4	0.03	0.296	10188	1222938	0	0	0	0	0	0.0430489	0	0	0	Bacteria	Bdellovibrionota	Bacteriovoracia	Bacteriovoracales	Bacteriovoracaceae			d__Bacteria;p__Bdellovibrionota;c__Bacteriovoracia;o__Bacteriovoracales;f__Bacteriovoracaceae;g__;s__
Aegir_M38_B30	5	87.66	1.091	87.03	0	0.378	57702	2387219	1.59403	0	0	0.0216794	0	0.122369	0	0	0	Bacteria	Pseudomonadota	Gammaproteobacteria	Methylococcales	Methylomonadaceae	WTBX01		d__Bacteria;p__Pseudomonadota;c__Gammaproteobacteria;o__Methylococcales;f__Methylomonadaceae;g__WTBX01;s__
Aegir_M38_B31	2	85.78	1.627	81.45	1.79	0.323	15911	2614696	0.175184	0.00123264	0	0	0.0261558	0.275552	0.00630746	0.110304	0	Bacteria	Bacteroidota	Bacteroidia	Flavobacteriales	Flavobacteriaceae	Urechidicola		d__Bacteria;p__Bacteroidota;c__Bacteroidia;o__Flavobacteriales;f__Flavobacteriaceae;g__Urechidicola;s__
Aegir_M38_B32	4	82.6	3.413	88.43	1.69	0.566	20964	2847697	0.125797	0.0168663	0	0.0512699	0.00858824	0.0598886	0.0238226	0.00432476	0	Bacteria	Pseudomonadota	Alphaproteobacteria	Rhodobacterales	Rhodobacteraceae	UBA3077		d__Bacteria;p__Pseudomonadota;c__Alphaproteobacteria;o__Rhodobacterales;f__Rhodobacteraceae;g__UBA3077;s__
Aegir_M38_B33	7	93.45	1.388	93.91	2.26	0.492	16731	3778589	0	0	0	0	0	0.0667841	0	0	0	Bacteria	Desulfobacterota	Desulfobulbia	Desulfobulbales	Desulfobulbaceae	DRLX01		d__Bacteria;p__Desulfobacterota;c__Desulfobulbia;o__Desulfobulbales;f__Desulfobulbaceae;g__DRLX01;s__
Aegir_M38_B34	0	59.27	7.758	77.87	9.17	0.437	12256	1430668	0	0	0	0	0	0.375133	0	0	0	Bacteria	Pseudomonadota	Zetaproteobacteria	Mariprofundales	Mariprofundaceae	GCA-2401635		d__Bacteria;p__Pseudomonadota;c__Zetaproteobacteria;o__Mariprofundales;f__Mariprofundaceae;g__GCA-2401635;s__
Aegir_M38_B35	3	54.98	2.258	48.86	3.86	0.693	3603	3833654	0	0	0	0	0	0.0357531	0	0	0	Bacteria	Myxococcota	UBA9042	PWKZ01	PWKZ01			d__Bacteria;p__Myxococcota;c__UBA9042;o__PWKZ01;f__PWKZ01;g__;s__
Aegir_M38_B36	4	72.41	5.172	88.6	2.84	0.577	27786	2817285	0.0164954	0.00176904	0	0	0.00238984	0.227416	0.0048322	0.00778753	0	Bacteria	Pseudomonadota	Alphaproteobacteria	Rhodobacterales	Rhodobacteraceae	UBA3077		d__Bacteria;p__Pseudomonadota;c__Alphaproteobacteria;o__Rhodobacterales;f__Rhodobacteraceae;g__UBA3077;s__
Aegir_M38_B37	1	81.58	0.432	87.21	0.09	0.472	15853	2107846	0	0	0	0	0	0.502296	0	0.011487	0	Bacteria	Pseudomonadota	Alphaproteobacteria	Caulobacterales	Maricaulaceae	Robiginitomaculum_A		d__Bacteria;p__Pseudomonadota;c__Alphaproteobacteria;o__Caulobacterales;f__Maricaulaceae;g__Robiginitomaculum_A;s__
Aegir_M38_B38	3	86.81	1	99.1	1.98	0.569	30126	2792326	0.0141619	0.00107128	0	0	0.00259888	0.631759	0.00380638	0.00906696	0	Bacteria	Pseudomonadota	Alphaproteobacteria	Rhodobacterales	Rhodobacteraceae	UBA3077		d__Bacteria;p__Pseudomonadota;c__Alphaproteobacteria;o__Rhodobacterales;f__Rhodobacteraceae;g__UBA3077;s__
Aegir_M38_B39	0	99.34	0.653	96.72	0.15	0.437	22488	2159146	0	0.00135166	0	0.00275522	0	0.0367173	0.0894879	0	0	Archaea	Halobacteriota	Archaeoglobi	Archaeoglobales	Archaeoglobaceae	Archaeoglobus_A		d__Archaea;p__Halobacteriota;c__Archaeoglobi;o__Archaeoglobales;f__Archaeoglobaceae;g__Archaeoglobus_A;s__
Aegir_M38_B4	2	90.68	1.307	95.02	0.37	0.477	26193	1471422	0	0	0	0	0	0.375057	1.4336	0.00452415	0	Archaea	Halobacteriota	Syntropharchaeia	ANME-1	ANME-1	G60ANME1		d__Archaea;p__Halobacteriota;c__Syntropharchaeia;o__ANME-1;f__ANME-1;g__G60ANME1;s__
Aegir_M38_B40	0	67.47	3.676	69.93	3.7	0.333	5835	2138043	0	0.000746156	0	0	0	0.225968	0	0	0	Bacteria	Bacteroidota	Bacteroidia	Flavobacteriales	Flavobacteriaceae	CG1-02-35-72		d__Bacteria;p__Bacteroidota;c__Bacteroidia;o__Flavobacteriales;f__Flavobacteriaceae;g__CG1-02-35-72;s__
Aegir_M38_B41	0	89.55	3.569	89.75	0.91	0.393	7483	2220892	0.00925366	0	0	0.0616766	0.00301984	0.0419471	0	0	0	Bacteria	Campylobacterota	Campylobacteria	Campylobacterales	Sulfurovaceae	SZUA-451		d__Bacteria;p__Campylobacterota;c__Campylobacteria;o__Campylobacterales;f__Sulfurovaceae;g__SZUA-451;s__
Aegir_M38_B42	2	93.44	3.846	89.84	1.41	0.606	6898	3043117	0	0	0	0	0	0.0527055	0	0	0	Bacteria	Actinomycetota	Acidimicrobiia	Acidimicrobiales	UBA11606	SZUA-87		d__Bacteria;p__Actinomycetota;c__Acidimicrobiia;o__Acidimicrobiales;f__UBA11606;g__SZUA-87;s__
Aegir_M38_B43	4	71.55	1.724	82.79	3.41	0.462	10115	1911591	0	0	0	0	0	0.299922	0	0	0	Bacteria	Pseudomonadota	Zetaproteobacteria	Mariprofundales	Mariprofundaceae	Mariprofundus		d__Bacteria;p__Pseudomonadota;c__Zetaproteobacteria;o__Mariprofundales;f__Mariprofundaceae;g__Mariprofundus;s__
Aegir_M38_B44	3	91.46	3.483	86.96	1.17	0.357	20572	1799894	0.0117571	0.00150494	0	0	0	0.221746	0.00485829	0	0	Bacteria	Campylobacterota	Campylobacteria	Campylobacterales	Sulfurimonadaceae	Sulfurimonas		d__Bacteria;p__Campylobacterota;c__Campylobacteria;o__Campylobacterales;f__Sulfurimonadaceae;g__Sulfurimonas;s__
Aegir_M38_B45	3	83.86	4.632	83.5	2.88	0.396	7905	2253178	0.275763	0.141384	0	1.29936	0.198263	0.0180276	0.988327	0	0	Bacteria	Pseudomonadota	Gammaproteobacteria	Methylococcales	Methylomonadaceae	Methyloprofundus	Methyloprofundus sp900128525	d__Bacteria;p__Pseudomonadota;c__Gammaproteobacteria;o__Methylococcales;f__Methylomonadaceae;g__Methyloprofundus;s__Methyloprofundus sp900128525
Aegir_M38_B46	1	63.73	0.537	60.98	1.25	0.57	5308	1924096	0	0	0	0	0.00342714	0.0377126	0	0	0	Bacteria	PUNC01	PUNC01	PUNC01	PWXJ01			d__Bacteria;p__PUNC01;c__PUNC01;o__PUNC01;f__PWXJ01;g__;s__
Aegir_M38_B47	1	69.59	3.367	65.07	2.35	0.317	21057	1556724	0.0200962	0.0016206	0	0	0.00569029	1.77572	0.00535313	0.00870271	0	Bacteria	Campylobacterota	Campylobacteria	Campylobacterales	Sulfurimonadaceae	Sulfurimonas		d__Bacteria;p__Campylobacterota;c__Campylobacteria;o__Campylobacterales;f__Sulfurimonadaceae;g__Sulfurimonas;s__
Aegir_M38_B48	0	87.58	4.044	86.2	3.12	0.335	18318	2490417	0.0137244	0	0	0	0	0.596592	0	0	0	Bacteria	Bacteroidota	Bacteroidia	Flavobacteriales	Flavobacteriaceae	CG1-02-35-72		d__Bacteria;p__Bacteroidota;c__Bacteroidia;o__Flavobacteriales;f__Flavobacteriaceae;g__CG1-02-35-72;s__
Aegir_M38_B49	3	96.77	0.967	97.58	2.41	0.481	17616	3301483	0.00272517	0.00322508	0	0.0137498	0	0.0414104	0.431957	0	0	Bacteria	Desulfobacterota	DSM-4660	Desulfatiglandales	Desulfatiglandaceae	B111-G9		d__Bacteria;p__Desulfobacterota;c__DSM-4660;o__Desulfatiglandales;f__Desulfatiglandaceae;g__B111-G9;s__
Aegir_M38_B5	0	94.11	0.635	95.92	3.75	0.455	10116	2534647	0	0	0	0	0	0.0442941	0	0	0	Bacteria	Planctomycetota	Phycisphaerae	Phycisphaerales	SM1A02	GCA-002718515		d__Bacteria;p__Planctomycetota;c__Phycisphaerae;o__Phycisphaerales;f__SM1A02;g__GCA-002718515;s__
Aegir_M38_B50	2	88.5	0.471	90.87	0.41	0.391	22833	2357003	0.0145218	0	0	0	0	0.284643	0	0.0107668	0	Bacteria	Pseudomonadota	Gammaproteobacteria	GCA-001735895	GCA-001735895			d__Bacteria;p__Pseudomonadota;c__Gammaproteobacteria;o__GCA-001735895;f__GCA-001735895;g__;s__
Aegir_M38_B51	0	54	0	54.82	0.48	0.381	3619	791717	0	0.00135715	0	0	0	0.0319355	0.00557268	0	0	Archaea	Thermoplasmatota	E2	UBA202	JdFR-43	JAGGXW01		d__Archaea;p__Thermoplasmatota;c__E2;o__UBA202;f__JdFR-43;g__JAGGXW01;s__
Aegir_M38_B52	3	95.16	1.075	87.98	0.1	0.551	25906	2762632	0	0	0	0	0	0.0551469	0	0.00470851	0	Bacteria	Planctomycetota	UBA1135	UBA1135	UBA1135	GCA-2746235		d__Bacteria;p__Planctomycetota;c__UBA1135;o__UBA1135;f__UBA1135;g__GCA-2746235;s__
Aegir_M38_B53	2	78.92	1.829	75.36	0.82	0.421	6885	1588683	0	0	0	0	0	0.137258	0.413976	0.00523716	0	Bacteria	Desulfobacterota	Desulfofervidia	Desulfofervidales	Desulfofervidaceae	Desulfofervidus		d__Bacteria;p__Desulfobacterota;c__Desulfofervidia;o__Desulfofervidales;f__Desulfofervidaceae;g__Desulfofervidus;s__
Aegir_M38_B54	2	90.59	1.198	90.35	0.42	0.528	10139	3394140	0	0	0	0	0	0.0457615	0	0	0	Bacteria	Delongbacteria	UBA4055	CAIWAD01	CAIWAD01	JACKCN01		d__Bacteria;p__Delongbacteria;c__UBA4055;o__CAIWAD01;f__CAIWAD01;g__JACKCN01;s__
Aegir_M38_B55	0	67.06	0.427	93.54	2.04	0.426	10775	707072	0	0	0	0	0	0.0476065	0	0	0	Bacteria	Patescibacteria	Paceibacteria	UBA9983_A	UBA2100			d__Bacteria;p__Patescibacteria;c__Paceibacteria;o__UBA9983_A;f__UBA2100;g__;s__
Aegir_M38_B56	0	90.73	4.744	84.12	0.67	0.414	11647	1383261	0	0	0	0	0	0.0431802	0	0	0	Archaea	Thermoproteota	Bathyarchaeia	B26-1	WUQV01	AUK093		d__Archaea;p__Thermoproteota;c__Bathyarchaeia;o__B26-1;f__WUQV01;g__AUK093;s__
Aegir_M38_B57	6	90.8	1.149	84.7	0.45	0.587	7620	5201955	0	0	0	0	0	0.0464298	0	0	0	Bacteria	Planctomycetota	Planctomycetia	Pirellulales	Thermoguttaceae			d__Bacteria;p__Planctomycetota;c__Planctomycetia;o__Pirellulales;f__Thermoguttaceae;g__;s__
Aegir_M38_B58	0	98.11	0	97.17	0.01	0.397	185241	2252585	0	0	0	0	0	0.137478	0	0	0	Bacteria	Bacteroidota	Bacteroidia	Flavobacteriales	UA16	UBA974	UBA974 sp002746975	d__Bacteria;p__Bacteroidota;c__Bacteroidia;o__Flavobacteriales;f__UA16;g__UBA974;s__UBA974 sp002746975
Aegir_M38_B59	0	73.3	0	74.78	3.13	0.448	5443	3349640	0	0	0	0.00490428	0.00238655	0.0379217	0.00712649	0	0	Bacteria	Spirochaetota	Leptospirae	Leptospirales	Leptospiraceae	Leptospira_B	Leptospira_B inadai	d__Bacteria;p__Spirochaetota;c__Leptospirae;o__Leptospirales;f__Leptospiraceae;g__Leptospira_B;s__Leptospira_B inadai
Aegir_M38_B6	1	97.29	1.081	87.65	2.69	0.34	55248	2905388	0.262185	0.00170112	0	0	0	0.0619616	0.0210304	0	0	Bacteria	Bacteroidota	Bacteroidia	Flavobacteriales	Crocinitomicaceae	UBA4466		d__Bacteria;p__Bacteroidota;c__Bacteroidia;o__Flavobacteriales;f__Crocinitomicaceae;g__UBA4466;s__
Aegir_M38_B60	0	56.15	0.467	83.8	1.91	0.234	12868	1010751	0	0.0016801	0	0.0112414	0.00628639	0.0526564	0.00254777	0	0	Archaea	Nanoarchaeota	Nanoarchaeia	Woesearchaeales	UBA583	UBA583		d__Archaea;p__Nanoarchaeota;c__Nanoarchaeia;o__Woesearchaeales;f__UBA583;g__UBA583;s__
Aegir_M38_B61	1	90.9	3.636	93.57	2.53	0.524	10245	5038846	0	0	0	0	0	0.0920402	0	0	0	Bacteria	Chloroflexota	Anaerolineae	Anaerolineales	UBA11858	NIOZ-UU35		d__Bacteria;p__Chloroflexota;c__Anaerolineae;o__Anaerolineales;f__UBA11858;g__NIOZ-UU35;s__
Aegir_M38_B62	0	52.63	7.017	51.46	12.49	0.357	4117	1262827	0.0101096	0.061492	1.40559	0.00279202	0	0.0369959	0.0706645	0	0	Bacteria	Campylobacterota	Campylobacteria	Campylobacterales	Sulfurimonadaceae	Sulfurimonas		d__Bacteria;p__Campylobacterota;c__Campylobacteria;o__Campylobacterales;f__Sulfurimonadaceae;g__Sulfurimonas;s__
Aegir_M38_B64	5	86.48	0.354	89.37	0.42	0.44	33875	3800865	0	0	0	0	0	0.345177	0	0	0	Bacteria	Bdellovibrionota	Oligoflexia	Oligoflexales				d__Bacteria;p__Bdellovibrionota;c__Oligoflexia;o__Oligoflexales;f__;g__;s__
Aegir_M38_B65	0	65.98	0	86.91	0.82	0.339	6923	2902026	0	0	0	0	0	0.0409355	0	0	0	Bacteria	Bacteroidota	Bacteroidia	Flavobacteriales	Crocinitomicaceae			d__Bacteria;p__Bacteroidota;c__Bacteroidia;o__Flavobacteriales;f__Crocinitomicaceae;g__;s__
Aegir_M38_B66	4	58.92	1.366	58.41	0.43	0.429	21397	2255174	0	0	0	0	0	0.885117	0	0	0	Bacteria	Desulfobacterota	Desulfobulbia	Desulfobulbales	Desulfurivibrionaceae			d__Bacteria;p__Desulfobacterota;c__Desulfobulbia;o__Desulfobulbales;f__Desulfurivibrionaceae;g__;s__
Aegir_M38_B67	5	93.99	0.617	94.91	2.04	0.441	22039	3455490	0	0	0	0	0	0.201089	0	0	0	Bacteria	Desulfobacterota	Desulfobulbia	Desulfobulbales	Desulfocapsaceae	Desulfocapsa		d__Bacteria;p__Desulfobacterota;c__Desulfobulbia;o__Desulfobulbales;f__Desulfocapsaceae;g__Desulfocapsa;s__
Aegir_M38_B68	1	86.44	0	89.19	0.49	0.599	80371	1996314	0	0	0	0	0	0.0675263	0.00185499	0	0	Bacteria	Bipolaricaulota	Bipolaricaulia	RBG-16-55-9	JANLFV01			d__Bacteria;p__Bipolaricaulota;c__Bipolaricaulia;o__RBG-16-55-9;f__JANLFV01;g__;s__
Aegir_M38_B69	0	98.29	0.026	96.18	0.02	0.398	27560	1772855	0	0.000711664	0	0	0	0.0531992	0.118025	0	0	Archaea	Halobacteriota	Archaeoglobi	Archaeoglobales	Archaeoglobaceae	B5-G16		d__Archaea;p__Halobacteriota;c__Archaeoglobi;o__Archaeoglobales;f__Archaeoglobaceae;g__B5-G16;s__
Aegir_M38_B7	3	56.08	5.027	62.43	3.53	0.546	3252	2351304	0	0	0	0	0	0.0349597	0	0	0	Bacteria	Pseudomonadota	Gammaproteobacteria	HK1	HK1			d__Bacteria;p__Pseudomonadota;c__Gammaproteobacteria;o__HK1;f__HK1;g__;s__
Aegir_M38_B70	0	80.53	1.789	90.19	1.59	0.512	5228	2460662	0	0.0146703	0	0.0143748	0	0.0364631	0.0225336	0	0	Bacteria	Pseudomonadota	Gammaproteobacteria	GCA-001735895	GCA-001735895	JACNJF01		d__Bacteria;p__Pseudomonadota;c__Gammaproteobacteria;o__GCA-001735895;f__GCA-001735895;g__JACNJF01;s__
Aegir_M38_B71	3	82.84	1.36	77.52	0.51	0.588	8026	2470165	0.00130989	0.000808829	0.00106038	0	0	0.0406913	0	0.00158367	0	Bacteria	Verrucomicrobiota	Verrucomicrobiae	Verrucomicrobiales	Akkermansiaceae			d__Bacteria;p__Verrucomicrobiota;c__Verrucomicrobiae;o__Verrucomicrobiales;f__Akkermansiaceae;g__;s__
Aegir_M38_B72	4	85.61	0.804	88.8	0.04	0.358	34799	2515358	0.418762	0	0	0.00478102	0	11.5066	0	0	0	Bacteria	Pseudomonadota	Gammaproteobacteria	Methylococcales	Methylomonadaceae	WTBX01		d__Bacteria;p__Pseudomonadota;c__Gammaproteobacteria;o__Methylococcales;f__Methylomonadaceae;g__WTBX01;s__
Aegir_M38_B73	6	86.13	0.919	98.06	0.06	0.377	22676	2377446	0	0	0	0	0	0.158568	0	0	0	Bacteria	Pseudomonadota	Gammaproteobacteria	Methylococcales	Methylomonadaceae			d__Bacteria;p__Pseudomonadota;c__Gammaproteobacteria;o__Methylococcales;f__Methylomonadaceae;g__;s__
Aegir_M38_B74	2	88.93	3.53	89.2	2.05	0.482	18123	2866118	0	0	0	0	0	0.354183	0	0.00479647	0	Bacteria	Pseudomonadota	Gammaproteobacteria	SZUA-229	SZUA-229	GCA-2746365		d__Bacteria;p__Pseudomonadota;c__Gammaproteobacteria;o__SZUA-229;f__SZUA-229;g__GCA-2746365;s__
Aegir_M38_B75	1	53.76	3.448	62.73	5.46	0.44	11929	1443513	0	0	0	0	0	0.192266	0	0	0	Bacteria	Pseudomonadota	Zetaproteobacteria	Mariprofundales	Mariprofundaceae	GCA-2401635		d__Bacteria;p__Pseudomonadota;c__Zetaproteobacteria;o__Mariprofundales;f__Mariprofundaceae;g__GCA-2401635;s__
Aegir_M38_B76	4	87.74	4.216	96.27	2.63	0.659	40122	6180288	0	0	0	0	0	0.183195	0	0	0	Bacteria	Myxococcota	Bradymonadia	UBA7976	UBA1532			d__Bacteria;p__Myxococcota;c__Bradymonadia;o__UBA7976;f__UBA1532;g__;s__
Aegir_M38_B77	2	66.22	0.408	63.07	1.17	0.338	17340	1319738	0.0262026	0.00536536	0	0	0.0245186	2.06619	0.0289317	0.00366439	0	Bacteria	Campylobacterota	Campylobacteria	Campylobacterales	Sulfurimonadaceae	Sulfurimonas		d__Bacteria;p__Campylobacterota;c__Campylobacteria;o__Campylobacterales;f__Sulfurimonadaceae;g__Sulfurimonas;s__
Aegir_M38_B78	0	73.17	4.036	75	5.42	0.346	3994	2072361	0.0173954	0.0168895	0.00232502	1.29196	0.0326336	0.0417167	0.0109726	0.0160798	0	Bacteria	Campylobacterota	Campylobacteria	Campylobacterales	Sulfurovaceae	UBA1140		d__Bacteria;p__Campylobacterota;c__Campylobacteria;o__Campylobacterales;f__Sulfurovaceae;g__UBA1140;s__
Aegir_M38_B79	1	98.33	0	99.88	0.11	0.308	349394	1571014	0	0	0	0	0	0.629016	0.0380377	0	0	Bacteria	Desulfobacterota	Thermodesulfobacteria	Thermodesulfobacteriales	Thermodesulfobacteriaceae	Thermodesulfobacterium		d__Bacteria;p__Desulfobacterota;c__Thermodesulfobacteria;o__Thermodesulfobacteriales;f__Thermodesulfobacteriaceae;g__Thermodesulfobacterium;s__
Aegir_M38_B8	3	64.19	0	80.45	0.06	0.319	10374	2542183	0.0488765	0.0142297	0	0.0922111	0.110781	0.0145453	0.469968	0.00504133	0	Bacteria	Bacteroidota	Bacteroidia	Flavobacteriales	Flavobacteriaceae	Lutimonas		d__Bacteria;p__Bacteroidota;c__Bacteroidia;o__Flavobacteriales;f__Flavobacteriaceae;g__Lutimonas;s__
Aegir_M38_B80	5	94.24	1.76	100	0.64	0.388	28042	2267314	0	0	0	0	0	0.169372	0	0.0432169	0	Bacteria	Pseudomonadota	Gammaproteobacteria	Nitrosococcales	Methylophagaceae	GCA-002733105		d__Bacteria;p__Pseudomonadota;c__Gammaproteobacteria;o__Nitrosococcales;f__Methylophagaceae;g__GCA-002733105;s__
Aegir_M38_B81	2	80.16	2.513	80.27	1.76	0.558	4302	2366630	0	0	0	0	0	0.0411746	0	0	0	Bacteria	Desulfobacterota	Desulfobulbia	Desulfobulbales	BM004			d__Bacteria;p__Desulfobacterota;c__Desulfobulbia;o__Desulfobulbales;f__BM004;g__;s__
Aegir_M38_B82	2	76.47	1.68	73.31	3.08	0.433	18002	1431997	0	0.000623819	0	0	0	0.417211	0	0	0	Bacteria	Pseudomonadota	Zetaproteobacteria	Mariprofundales	Mariprofundaceae	GCA-2401635		d__Bacteria;p__Pseudomonadota;c__Zetaproteobacteria;o__Mariprofundales;f__Mariprofundaceae;g__GCA-2401635;s__
Aegir_M38_B83	2	86.57	4.874	94.85	2.6	0.671	11224	7772923	0	0	0	0	0	0.0493064	0	0	0	Bacteria	Myxococcota	Bradymonadia	UBA7976	UBA1532	JACKDL01		d__Bacteria;p__Myxococcota;c__Bradymonadia;o__UBA7976;f__UBA1532;g__JACKDL01;s__
Aegir_M38_B84	2	96.3	2.347	99.57	2.63	0.497	55170	2934530	0	0	0	0	0	16.515	0	0	0.00139524	Bacteria	Pseudomonadota	Gammaproteobacteria					d__Bacteria;p__Pseudomonadota;c__Gammaproteobacteria;o__;f__;g__;s__
Aegir_M38_B85	3	96.91	1.543	99.12	0.06	0.365	28995	3901458	0.00901257	0	0	0	0	0.117289	0.00287514	0	0	Bacteria	Pseudomonadota	Gammaproteobacteria	Enterobacterales_A	Alteromonadaceae	GCA-2401725	GCA-2401725 sp002401725	d__Bacteria;p__Pseudomonadota;c__Gammaproteobacteria;o__Enterobacterales_A;f__Alteromonadaceae;g__GCA-2401725;s__GCA-2401725 sp002401725
Aegir_M38_B86	1	85.17	1.229	78.24	0.59	0.375	8146	1511936	0.296046	0.0520911	0.000815183	1.00481	0.197596	0.0441779	0.620677	0.00464418	0	Bacteria	Campylobacterota	Campylobacteria	Campylobacterales	Sulfurovaceae	Sulfurovum		d__Bacteria;p__Campylobacterota;c__Campylobacteria;o__Campylobacterales;f__Sulfurovaceae;g__Sulfurovum;s__
Aegir_M38_B87	3	95.33	2.1	96.21	0.65	0.279	35285	4108848	0	0	0	0.00500414	0	0.0815678	0	0	0	Bacteria	UBP6	JAFGXH01	JAFGXH01	JAFGXH01			d__Bacteria;p__UBP6;c__JAFGXH01;o__JAFGXH01;f__JAFGXH01;g__;s__
Aegir_M38_B88	16	97.64	0.927	100	0.62	0.61	31438	7104180	0	0	0	0	0	0.13038	0.0105246	0	0	Bacteria	Pseudomonadota	Gammaproteobacteria	Pseudomonadales	Pseudomonadaceae	Pseudomonas_E	Pseudomonas_E sp002874965	d__Bacteria;p__Pseudomonadota;c__Gammaproteobacteria;o__Pseudomonadales;f__Pseudomonadaceae;g__Pseudomonas_E;s__Pseudomonas_E sp002874965
Aegir_M38_B89	1	98.37	1.081	87.98	0.27	0.364	75633	2939537	0	0	0	0	0	0.0968173	0	0	0	Bacteria	Bacteroidota	Bacteroidia	Flavobacteriales	Crocinitomicaceae	UBA4466		d__Bacteria;p__Bacteroidota;c__Bacteroidia;o__Flavobacteriales;f__Crocinitomicaceae;g__UBA4466;s__
Aegir_M38_B9	4	74.73	0.537	84.94	0.57	0.313	10374	1723943	0.0353288	0	0	0	0.00727746	0.0588609	0	0.0771836	0	Bacteria	Bacteroidota	Bacteroidia	Flavobacteriales	Vicingaceae	GCA-002793235		d__Bacteria;p__Bacteroidota;c__Bacteroidia;o__Flavobacteriales;f__Vicingaceae;g__GCA-002793235;s__
Aegir_M38_B90	1	91.83	0.653	87.4	0.17	0.458	125121	1924118	0	0	0	0	0	0.7398	0.0298292	0	0	Archaea	Halobacteriota	Syntropharchaeia	ANME-1	ANME-1	JANPRD01		d__Archaea;p__Halobacteriota;c__Syntropharchaeia;o__ANME-1;f__ANME-1;g__JANPRD01;s__
Aegir_M38_B91	4	93.69	0	95.89	0.2	0.438	17231	2105451	0	0	0	0	0	2.43118	0	0	0	Bacteria	Pseudomonadota	Zetaproteobacteria	Mariprofundales	Mariprofundaceae	GCA-2401635		d__Bacteria;p__Pseudomonadota;c__Zetaproteobacteria;o__Mariprofundales;f__Mariprofundaceae;g__GCA-2401635;s__
Aegir_M38_B92	3	82.88	0.699	82.81	1.01	0.342	36723	2086244	0.0376459	0.00300918	0.0139229	0	0.00650481	0.325066	0.00753336	0.0136736	0	Bacteria	Campylobacterota	Campylobacteria	Campylobacterales	Sulfurimonadaceae	Sulfurimonas		d__Bacteria;p__Campylobacterota;c__Campylobacteria;o__Campylobacterales;f__Sulfurimonadaceae;g__Sulfurimonas;s__
Aegir_M38_B93	4	62.22	0.344	64.35	0.2	0.571	8358	2003622	0.0202676	0.00107762	0	0	0.00225678	0.0984575	0.00470073	0.00836257	0	Bacteria	Pseudomonadota	Alphaproteobacteria	Rhodobacterales	Rhodobacteraceae	UBA3077		d__Bacteria;p__Pseudomonadota;c__Alphaproteobacteria;o__Rhodobacterales;f__Rhodobacteraceae;g__UBA3077;s__
Aegir_M38_B94	2	88.17	2.277	96.35	1.96	0.445	13169	1683892	0	0	0	0	0	0.128667	0	0.019509	0	Bacteria	Pseudomonadota	Alphaproteobacteria	Caedimonadales	UBA9215	UBA9215		d__Bacteria;p__Pseudomonadota;c__Alphaproteobacteria;o__Caedimonadales;f__UBA9215;g__UBA9215;s__
Aegir_M38_B95	7	81.49	3.273	77.94	5.62	0.502	7290	2459406	0	0	0	0	0	0.0438714	0	0	0	Bacteria	Desulfobacterota	Desulfobulbia	Desulfobulbales	Desulfurivibrionaceae			d__Bacteria;p__Desulfobacterota;c__Desulfobulbia;o__Desulfobulbales;f__Desulfurivibrionaceae;g__;s__
Aegir_M38_B96	0	83.98	0.97	83.47	1.81	0.354	16811	1293094	0	0	0	0	0	0.0253764	0.142721	0	0	Archaea	Thermoproteota	Nitrososphaeria	Geothermarchaeales	JDFR-13	B109-G9		d__Archaea;p__Thermoproteota;c__Nitrososphaeria;o__Geothermarchaeales;f__JDFR-13;g__B109-G9;s__
Aegir_M38_B97	5	88.87	3.218	95.2	0.65	0.517	47624	3296877	0	0	0	0	0	0.168888	0.00282093	0	0	Bacteria	Pseudomonadota	Gammaproteobacteria	Arenicellales	LS-SOB	JAAELZ01		d__Bacteria;p__Pseudomonadota;c__Gammaproteobacteria;o__Arenicellales;f__LS-SOB;g__JAAELZ01;s__
Aegir_M38_B98	2	73.67	1.219	69.16	0.43	0.374	6428	2638103	0	0	0	0	0.0137961	0.0383121	0.00713829	0	0	Bacteria	Pseudomonadota	Gammaproteobacteria	Xanthomonadales	Marinicellaceae	NORP309		d__Bacteria;p__Pseudomonadota;c__Gammaproteobacteria;o__Xanthomonadales;f__Marinicellaceae;g__NORP309;s__
Aegir_M38_B99	6	84.48	1.724	100	0.66	0.423	53103	2115077	0.0306766	0.00143165	0	0.00853525	0.0121862	0.314009	0.0054583	0.0456809	0	Bacteria	Pseudomonadota	Gammaproteobacteria	Nitrosococcales	Methylophagaceae	GCA-002733105		d__Bacteria;p__Pseudomonadota;c__Gammaproteobacteria;o__Nitrosococcales;f__Methylophagaceae;g__GCA-002733105;s__
Aegir_M39_B1	0	64.15	9.156	60.82	4.33	0.294	6257	1067901	0	0.00197203	0	0	0	0.305241	0.0310451	0	0	Bacteria	Calescibacterota	Calescibacteriia					d__Bacteria;p__Calescibacterota;c__Calescibacteriia;o__;f__;g__;s__
Aegir_M39_B10	1	82.64	1.047	84.41	0.05	0.503	8002	2448137	0.00285277	0.00978169	0	0.00193336	0	0	0.0552891	0.00688837	0	Bacteria	Bacteroidota	Bacteroidia	Bacteroidales	VadinHA17	DRPN01		d__Bacteria;p__Bacteroidota;c__Bacteroidia;o__Bacteroidales;f__VadinHA17;g__DRPN01;s__
Aegir_M39_B100	7	74.18	1.827	71.49	3.36	0.491	5765	4201578	0	0.000501855	0	0	0	0	0.051725	0	0	Bacteria	Myxococcota	B64-G9	B64-G9	B64-G9			d__Bacteria;p__Myxococcota;c__B64-G9;o__B64-G9;f__B64-G9;g__;s__
Aegir_M39_B101	1	94.77	1.96	94.84	1.9	0.373	27890	1712111	0	0.0136198	0	0.00114743	0	0.0131309	0.109292	0	0	Archaea	Halobacteriota	Archaeoglobi	Archaeoglobales	Archaeoglobaceae	B5-G16		d__Archaea;p__Halobacteriota;c__Archaeoglobi;o__Archaeoglobales;f__Archaeoglobaceae;g__B5-G16;s__
Aegir_M39_B102	6	98.22	1.2	96.91	0.21	0.694	48213	4241893	0.16281	0.00490004	0	0.00507958	0.00140208	0	0.30227	0	0	Bacteria	Pseudomonadota	Alphaproteobacteria	Rhodobacterales	Rhodobacteraceae	Oceanicella		d__Bacteria;p__Pseudomonadota;c__Alphaproteobacteria;o__Rhodobacterales;f__Rhodobacteraceae;g__Oceanicella;s__
Aegir_M39_B103	1	58.65	1.23	60.22	0.31	0.408	3623	1603320	0.0106944	0.001886	0	0.00234124	0	0	0.0420552	0	0	Bacteria	Bacteroidota	Bacteroidia	Flavobacteriales	Flavobacteriaceae	Lutimonas		d__Bacteria;p__Bacteroidota;c__Bacteroidia;o__Flavobacteriales;f__Flavobacteriaceae;g__Lutimonas;s__
Aegir_M39_B104	2	100	0	99.36	0.48	0.361	39179	2021102	0.0091431	0	0	0	0.00279554	0	0.0921245	0.00538467	0	Bacteria	Pseudomonadota	Alphaproteobacteria	Micavibrionales	UBA2020	JAJFGX01		d__Bacteria;p__Pseudomonadota;c__Alphaproteobacteria;o__Micavibrionales;f__UBA2020;g__JAJFGX01;s__
Aegir_M39_B105	2	96.77	1.075	88.86	0.78	0.649	32979	4723099	0.104065	0.000601641	0	0.00842794	0.00314127	0.00274977	0.0535502	0	0	Bacteria	Planctomycetota	UBA1135	UBA1135	GCA-002686595			d__Bacteria;p__Planctomycetota;c__UBA1135;o__UBA1135;f__GCA-002686595;g__;s__
Aegir_M39_B106	1	81.38	1.818	80.47	1	0.604	6130	3382585	0.00192815	0.0522931	0	0.00757534	0	0	0.0318933	0	0	Bacteria	Chloroflexota	Anaerolineae	Aggregatilineales	Ch27			d__Bacteria;p__Chloroflexota;c__Anaerolineae;o__Aggregatilineales;f__Ch27;g__;s__
Aegir_M39_B107	1	90.8	3.2	87.12	1.9	0.407	18979	1021644	0	0	0	0.00206709	0	0.00423625	0.0723262	0.00123651	0	Archaea	Thermoplasmatota	E2	DHVEG-1	B18-G2			d__Archaea;p__Thermoplasmatota;c__E2;o__DHVEG-1;f__B18-G2;g__;s__
Aegir_M39_B108	2	87.61	2.244	94.91	1.78	0.581	15410	2656907	0.0526734	0.0200119	0	1.09059	0.00267836	0.0345768	0.136793	0.00479419	0	Bacteria	Pseudomonadota	Alphaproteobacteria	Rhodobacterales	Rhodobacteraceae	UBA3077		d__Bacteria;p__Pseudomonadota;c__Alphaproteobacteria;o__Rhodobacterales;f__Rhodobacteraceae;g__UBA3077;s__
Aegir_M39_B109	3	96.77	1.075	94.43	1.25	0.397	20667	4227440	0.0217281	0.00365347	0	0.0335443	0.0106441	0.00275656	0.27376	0	0	Bacteria	Bacteroidota	Bacteroidia	Bacteroidales	JAADJA01	JAADJA01		d__Bacteria;p__Bacteroidota;c__Bacteroidia;o__Bacteroidales;f__JAADJA01;g__JAADJA01;s__
Aegir_M39_B11	2	97.73	2.197	97.54	0.53	0.448	28507	3146851	0	0	0	0	0	0	0.217691	0	0	Bacteria	Zixibacteria	MSB-5A5	GN15	40940	JAJRZL01		d__Bacteria;p__Zixibacteria;c__MSB-5A5;o__GN15;f__FEB-12;g__JAJRZL01;s__
Aegir_M39_B110	5	97.09	4.032	100	2.59	0.574	64878	7391058	0.0109761	0	0	0.0025205	0	0	0.152272	0	0	Bacteria	Myxococcota	Polyangia	Haliangiales	Haliangiaceae	NORP324		d__Bacteria;p__Myxococcota;c__Polyangia;o__Haliangiales;f__Haliangiaceae;g__NORP324;s__
Aegir_M39_B111	6	83.81	2.572	79.8	1.14	0.439	5027	2280432	0.0294225	0	0	0	0	0	0.0291177	0	0	Bacteria	Pseudomonadota	Gammaproteobacteria	CAJXQU01	CAJXQU01	CAJXQU01		d__Bacteria;p__Pseudomonadota;c__Gammaproteobacteria;o__CAJXQU01;f__CAJXQU01;g__CAJXQU01;s__
Aegir_M39_B112	5	97.73	2.197	99.38	0.67	0.45	35296	3818127	0.0161356	0.00105127	0	0.0407847	0	0.0175546	0.0854233	0.000971164	0	Bacteria	Calditrichota	Calditrichia	Calditrichales	Calditrichaceae	JANTFQ01		d__Bacteria;p__Calditrichota;c__Calditrichia;o__Calditrichales;f__Calditrichaceae;g__JANTFQ01;s__
Aegir_M39_B113	1	55.32	0	67.15	1.52	0.366	4852	2126270	0.00404774	0.00164228	0	0.0432771	0.00521532	0.00388823	0.0264249	0	0	Bacteria	Bacteroidota	Bacteroidia	Bacteroidales	UBA1556	CG2-30-33-31		d__Bacteria;p__Bacteroidota;c__Bacteroidia;o__Bacteroidales;f__UBA1556;g__CG2-30-33-31;s__
Aegir_M39_B114	0	75.16	4.205	77.98	8.14	0.347	4498	2420124	0	0.00154946	0	0.00225032	0	0.00405471	0.0461342	0	0	Archaea	Asgardarchaeota	JAGGXT01	JAGGXT01	JAGGXT01			d__Archaea;p__Asgardarchaeota;c__JAGGXT01;o__JAGGXT01;f__JAGGXT01;g__;s__
Aegir_M39_B115	0	50.2	0	52.17	0.79	0.418	3237	894742	0	0	0	0	0	0.00495254	0.0412525	0	0	Archaea	Thermoproteota	Thermoprotei	Thermofilales	B69-G16	B69-G16		d__Archaea;p__Thermoproteota;c__Thermoprotei;o__Thermofilales;f__B69-G16;g__B69-G16;s__
Aegir_M39_B116	0	53.62	2.863	63.56	2.78	0.475	3374	1068199	0	0.00799727	0.0106676	0	0	0	0.0358535	0	0	Bacteria	Campylobacterota	Campylobacteria	Campylobacterales	Hydrogenimonadaceae	Hydrogenimonas		d__Bacteria;p__Campylobacterota;c__Campylobacteria;o__Campylobacterales;f__Hydrogenimonadaceae;g__Hydrogenimonas;s__
Aegir_M39_B117	5	82.54	0.713	76.68	0.99	0.575	10158	2578697	0.00820448	0.00444055	0	0	0.0134086	0.00830325	1.47787	0.0118234	0.00270987	Bacteria	Pseudomonadota	Alphaproteobacteria	Rhodobacterales	Rhodobacteraceae	Roseovarius		d__Bacteria;p__Pseudomonadota;c__Alphaproteobacteria;o__Rhodobacterales;f__Rhodobacteraceae;g__Roseovarius;s__
Aegir_M39_B118	0	84.46	0	88.47	3.01	0.457	22400	1356654	0	0	0	0	0	0.0049286	0.068237	0	0	Archaea	Thermoproteota	Nitrososphaeria	Conexivisphaerales				d__Archaea;p__Thermoproteota;c__Nitrososphaeria;o__Conexivisphaerales;f__;g__;s__
Aegir_M39_B119	6	91.52	1.753	96.09	1.98	0.382	17336	3203334	0.22697	0.0121417	0	0.0087265	0.0341691	0.13056	0.143526	0.0590976	0	Bacteria	Pseudomonadota	Gammaproteobacteria	Methylococcales	Methylomonadaceae	QPIN01		d__Bacteria;p__Pseudomonadota;c__Gammaproteobacteria;o__Methylococcales;f__Methylomonadaceae;g__QPIN01;s__
Aegir_M39_B12	0	95.26	0	90.09	0.13	0.318	21674	2262466	0.0051625	0.0692142	0	0.00763608	0	0.00318961	0.0577101	0.00860212	0	Bacteria	Bacteroidota	Bacteroidia	Flavobacteriales	Flavobacteriaceae	Polaribacter		d__Bacteria;p__Bacteroidota;c__Bacteroidia;o__Flavobacteriales;f__Flavobacteriaceae;g__Polaribacter;s__
Aegir_M39_B120	8	92.25	1.935	97.21	1.39	0.571	21671	5664505	0.0116675	0.00405038	0	0.00617005	0.00230608	0	0.08898	0	0	Bacteria	Myxococcota	Bradymonadia	Bradymonadales	Bradymonadaceae			d__Bacteria;p__Myxococcota;c__Bradymonadia;o__Bradymonadales;f__Bradymonadaceae;g__;s__
Aegir_M39_B121	2	64.63	0.38	65.79	1.24	0.332	68903	2024409	0.0895764	0.011046	0	0.0493651	0.0329353	0.0289989	0.35028	0.0426832	0	Bacteria	Bacteroidota	Bacteroidia	Flavobacteriales	Flavobacteriaceae	GCA-002733185		d__Bacteria;p__Bacteroidota;c__Bacteroidia;o__Flavobacteriales;f__Flavobacteriaceae;g__GCA-002733185;s__
Aegir_M39_B122	2	87.58	1.829	86.23	0.45	0.452	8819	1850747	0	0	0	0	0.00814939	0	0.0551628	0.0118895	0	Bacteria	Pseudomonadota	Gammaproteobacteria	Arenicellales	LS-SOB	JAAELZ01		d__Bacteria;p__Pseudomonadota;c__Gammaproteobacteria;o__Arenicellales;f__LS-SOB;g__JAAELZ01;s__
Aegir_M39_B123	6	98.06	0.645	98.99	4.35	0.514	40437	3736397	0	0	0	0	0	0	0.104078	0	0	Bacteria	Desulfobacterota	DSM-4660	Desulfatiglandales	Desulfatiglandaceae	B46-G9		d__Bacteria;p__Desulfobacterota;c__DSM-4660;o__Desulfatiglandales;f__Desulfatiglandaceae;g__B46-G9;s__
Aegir_M39_B124	0	96.11	0	91.67	2.58	0.486	328337	1471690	0	0	0	0	0	0.00924314	0.106096	0	0	Archaea	Thermoproteota	Nitrososphaeria_A	Caldarchaeales	Wolframiiraptoraceae	Benthortus		d__Archaea;p__Thermoproteota;c__Nitrososphaeria_A;o__Caldarchaeales;f__Wolframiiraptoraceae;g__Benthortus;s__
Aegir_M39_B125	4	97.63	2.197	95.17	1.12	0.569	39378	4901499	0	0.0281036	0	0	0	0.00204087	0.0494196	0	0	Bacteria	KSB1	UBA2214	JACIZP01	JADDFT01	JADDFT01		d__Bacteria;p__KSB1;c__UBA2214;o__JACIZP01;f__JADDFT01;g__JADDFT01;s__
Aegir_M39_B126	6	96.45	1.313	96.93	1.23	0.454	144662	2501353	0	0.0455528	0	0.00278602	0	0	0.0767439	0.00195549	0	Bacteria	Desulfobacterota	DSM-4660	Desulfatiglandales	Desulfatiglandaceae	JAGGTJ01		d__Bacteria;p__Desulfobacterota;c__DSM-4660;o__Desulfatiglandales;f__Desulfatiglandaceae;g__JAGGTJ01;s__
Aegir_M39_B127	3	99.47	1.508	98.28	0.48	0.507	93613	3259528	0.0841438	0.554515	0.00433208	0.00946363	0	0	0.0988837	0	0.00182814	Bacteria	Pseudomonadota	Gammaproteobacteria	GCA-001735895	GCA-001735895	JACNJF01		d__Bacteria;p__Pseudomonadota;c__Gammaproteobacteria;o__GCA-001735895;f__GCA-001735895;g__JACNJF01;s__
Aegir_M39_B128	5	98.63	1.222	98.13	0.1	0.612	71119	3182652	0.267254	0.00287148	0	0	0	0.00227767	0.0707726	0	0.00898773	Bacteria	Pseudomonadota	Alphaproteobacteria	Rhodobacterales	Rhodobacteraceae	JAJRUE01		d__Bacteria;p__Pseudomonadota;c__Alphaproteobacteria;o__Rhodobacterales;f__Rhodobacteraceae;g__JAJRUE01;s__
Aegir_M39_B129	3	80.6	2.14	81.14	0.68	0.644	6534	2117702	0.00769232	0.328962	0	0.008967	0	0	0.0290276	0	0	Bacteria	Pseudomonadota	Gammaproteobacteria	Chromatiales	Sedimenticolaceae	Thiolapillus		d__Bacteria;p__Pseudomonadota;c__Gammaproteobacteria;o__Chromatiales;f__Sedimenticolaceae;g__Thiolapillus;s__
Aegir_M39_B13	1	90.81	0.54	87.59	1.44	0.29	43665	2679979	0.00519414	0.019748	0	0.480589	0	0.0018219	0.0905147	0	0	Bacteria	Bacteroidota	Bacteroidia	Flavobacteriales	Crocinitomicaceae	Putridiphycobacter		d__Bacteria;p__Bacteroidota;c__Bacteroidia;o__Flavobacteriales;f__Crocinitomicaceae;g__Putridiphycobacter;s__
Aegir_M39_B130	3	78.57	0.967	67.19	1.45	0.469	5200	1734626	0.00373244	0.000403146	0	0.0295092	0	0.00100841	0.0324575	0	0	Bacteria	Desulfobacterota_F	Desulfuromonadia	Desulfuromonadales	Geopsychrobacteraceae			d__Bacteria;p__Desulfobacterota_F;c__Desulfuromonadia;o__Desulfuromonadales;f__Geopsychrobacteraceae;g__;s__
Aegir_M39_B131	2	75.47	0	67.34	2.42	0.637	4381	3230406	0	0.00124317	0	0	0	0.000970195	0.0454913	0	0	Bacteria	Armatimonadota	UBA5377	UBA5377	FEN-943			d__Bacteria;p__Armatimonadota;c__UBA5377;o__UBA5377;f__FEN-943;g__;s__
Aegir_M39_B132	1	55.56	0	45.67	0.52	0.642	3550	1030272	0	0	0	0.00905043	0	0.00510237	0.0477075	0	0	Bacteria	Planctomycetota	B143-G9	B143-G9	B143-G9	B143-G9		d__Bacteria;p__Planctomycetota;c__B143-G9;o__B143-G9;f__B143-G9;g__B143-G9;s__
Aegir_M39_B133	0	81.35	2.884	77.7	1.39	0.487	8781	1795398	0.0168922	0.0364456	0	0.00315812	0	0.00172342	0.156876	0.00222436	0.00372077	Bacteria	Campylobacterota	Campylobacteria	Campylobacterales	QNZT01	QNZT01		d__Bacteria;p__Campylobacterota;c__Campylobacteria;o__Campylobacterales;f__QNZT01;g__QNZT01;s__
Aegir_M39_B134	2	74.59	1.781	74.92	0.46	0.599	5601	1546915	0	0.0212339	0	0	0	0	0.0490518	0	0.0332112	Bacteria	Pseudomonadota	Gammaproteobacteria	Methylococcales	Methylothermaceae	Methylohalobius		d__Bacteria;p__Pseudomonadota;c__Gammaproteobacteria;o__Methylococcales;f__Methylothermaceae;g__Methylohalobius;s__
Aegir_M39_B135	5	62.38	0.25	59.72	0.93	0.556	3754	2020034	0	0.00182164	0	0.00411682	0	0.00169353	0.0430484	0	0.00969689	Bacteria	Desulfobacterota	Syntrophobacteria	Syntrophobacterales	DSM-9756			d__Bacteria;p__Desulfobacterota;c__Syntrophobacteria;o__Syntrophobacterales;f__DSM-9756;g__;s__
Aegir_M39_B136	5	97.31	2.15	99.65	1.56	0.419	119483	2989765	0	0.00114006	0	0	0	0	0.856914	0.00118435	0	Bacteria	Bacteroidota	Bacteroidia	Bacteroidales	F082	UBA4459		d__Bacteria;p__Bacteroidota;c__Bacteroidia;o__Bacteroidales;f__F082;g__UBA4459;s__
Aegir_M39_B137	2	93.1	2.658	90.08	0.74	0.319	43030	3292219	0.0637195	0.0146466	0	0.14193	0.114927	0.0131211	0.701709	0.0124641	0	Bacteria	Bacteroidota	Bacteroidia	Flavobacteriales	Flavobacteriaceae	Lutimonas		d__Bacteria;p__Bacteroidota;c__Bacteroidia;o__Flavobacteriales;f__Flavobacteriaceae;g__Lutimonas;s__
Aegir_M39_B138	5	94.36	0.469	89.52	0.01	0.676	42346	2644089	0.00748493	0.581502	0	0.00169271	0	0	0.0648451	0	0.0245754	Bacteria	Pseudomonadota	Gammaproteobacteria	J113	J113	J113		d__Bacteria;p__Pseudomonadota;c__Gammaproteobacteria;o__J113;f__J113;g__J113;s__
Aegir_M39_B139	1	96.7	2.197	95.95	0.83	0.455	112583	3047302	0.0187509	0.00172025	0	0.0415896	0	0	0.132865	0	0	Bacteria	Zixibacteria	MSB-5A5	GN15	40940	JAJRZL01		d__Bacteria;p__Zixibacteria;c__MSB-5A5;o__GN15;f__FEB-12;g__JAJRZL01;s__
Aegir_M39_B14	1	77.36	8.472	74.16	10.13	0.362	6946	3300702	0.14456	0	0	0.0158218	0.00741702	0.00227568	0.034692	0.00243872	0	Bacteria	Bacteroidota	Bacteroidia	Cytophagales	Cyclobacteriaceae	JAKISE01		d__Bacteria;p__Bacteroidota;c__Bacteroidia;o__Cytophagales;f__Cyclobacteriaceae;g__JAKISE01;s__
Aegir_M39_B140	5	88.64	1.379	88.81	0.04	0.403	30880	2835536	0.0267701	0.0138551	0	0.012468	0.00579607	0.00705288	0.103261	0	0	Bacteria	Pseudomonadota	Gammaproteobacteria	Methylococcales	Methylomonadaceae	Methyloprofundus		d__Bacteria;p__Pseudomonadota;c__Gammaproteobacteria;o__Methylococcales;f__Methylomonadaceae;g__Methyloprofundus;s__
Aegir_M39_B141	4	74.29	0	72.55	2.48	0.63	13606	4332782	0	0	0	0	0	0	0.061141	0	0	Bacteria	Desulfobacterota_F	DSWW01	DSWW01	DSWW01			d__Bacteria;p__Desulfobacterota_F;c__DSWW01;o__DSWW01;f__DSWW01;g__;s__
Aegir_M39_B142	1	85.41	0.099	91.09	0.05	0.499	9521	2022984	0.00943673	0	0	0.0105239	0	0	0.0555169	0	0	Bacteria	Fermentibacterota	Fermentibacteria	Fermentibacterales	Fermentibacteraceae	Sabulitectum		d__Bacteria;p__Fermentibacterota;c__Fermentibacteria;o__Fermentibacterales;f__Fermentibacteraceae;g__Sabulitectum;s__
Aegir_M39_B143	9	63.22	1.098	65.79	0.43	0.45	4051	2483252	0	0.00488075	0	0.0152977	0	0.022196	0.0444615	0.00837161	0	Bacteria	Calditrichota	Calditrichia	Calditrichales	Calditrichaceae			d__Bacteria;p__Calditrichota;c__Calditrichia;o__Calditrichales;f__Calditrichaceae;g__;s__
Aegir_M39_B144	4	96.86	1.451	100	0.15	0.556	41868	3113117	0.0244544	0.0121525	0	0.00391039	0	0.00589028	0.448864	0.00523883	0	Bacteria	Pseudomonadota	Gammaproteobacteria	Chromatiales	Sedimenticolaceae	Thiolapillus		d__Bacteria;p__Pseudomonadota;c__Gammaproteobacteria;o__Chromatiales;f__Sedimenticolaceae;g__Thiolapillus;s__
Aegir_M39_B145	8	61.59	1.363	60.67	0.07	0.448	3968	2397126	0	0.122404	0	0	0	0	0.0283068	0.00116124	0	Bacteria	Calditrichota	Calditrichia	Calditrichales	Calditrichaceae			d__Bacteria;p__Calditrichota;c__Calditrichia;o__Calditrichales;f__Calditrichaceae;g__;s__
Aegir_M39_B146	8	99.2	1.537	100	0.62	0.406	33459	3391854	0.0756948	0.0142318	0	0	0	0	0.125566	0	0	Bacteria	Pseudomonadota	Gammaproteobacteria	Methylococcales	Methylomonadaceae			d__Bacteria;p__Pseudomonadota;c__Gammaproteobacteria;o__Methylococcales;f__Methylomonadaceae;g__;s__
Aegir_M39_B147	2	97.2	1.6	96.18	1.33	0.331	41372	2100377	0	0	0	0.0016254	0	0.00366178	0.323652	0	0	Archaea	Thermoplasmatota	E2	DHVEG-1	DHVEG-1	B44-G15		d__Archaea;p__Thermoplasmatota;c__E2;o__DHVEG-1;f__DHVEG-1;g__B44-G15;s__
Aegir_M39_B148	1	70	2	78.27	2.78	0.532	4830	2990713	0.00222769	0.109915	0	0.0115938	0	0	0.0301917	0	0	Bacteria	Chloroflexota	Anaerolineae	4572-78	4572-78	JANTHQ01		d__Bacteria;p__Chloroflexota;c__Anaerolineae;o__4572-78;f__4572-78;g__JANTHQ01;s__
Aegir_M39_B149	6	92.7	0	98.61	0.03	0.483	17884	2227054	0.119723	0.50009	0.173172	0.0168618	0	0	0.275049	0	0.00470626	Bacteria	Pseudomonadota	Gammaproteobacteria	Methylococcales	Methylomonadaceae	Methylomarinum		d__Bacteria;p__Pseudomonadota;c__Gammaproteobacteria;o__Methylococcales;f__Methylomonadaceae;g__Methylomarinum;s__
Aegir_M39_B15	6	94.44	1.098	95.17	0.71	0.498	27554	5657013	0.00486681	0.000504455	0	0.0093558	0.0151244	0.0042316	0.094338	0.00435535	0	Bacteria	KSB1	UBA2214	UBA2214	Zgenome-0027	JAJRST01		d__Bacteria;p__KSB1;c__UBA2214;o__UBA2214;f__Zgenome-0027;g__JAJRST01;s__
Aegir_M39_B150	6	87.03	1.33	93.53	0.83	0.367	8165	3198039	0.00291184	0.0654003	0	0.0335919	0	0.0058935	0.157237	0.00255682	0	Bacteria	Pseudomonadota	Gammaproteobacteria	Beggiatoales	Beggiatoaceae	Thiomargarita		d__Bacteria;p__Pseudomonadota;c__Gammaproteobacteria;o__Beggiatoales;f__Beggiatoaceae;g__Thiomargarita;s__
Aegir_M39_B151	3	96.59	0	94.16	3.89	0.674	43718	3235271	0	0	0	0	0	0.00207606	0.0920521	0	0	Bacteria	Planctomycetota	PUPC01	PUPC01	PUPC01			d__Bacteria;p__Planctomycetota;c__PUPC01;o__PUPC01;f__PUPC01;g__;s__
Aegir_M39_B152	0	93.56	0	94.03	0	0.476	340500	2581047	0.062316	0.00654158	0	0.0059061	0	0.000580628	0.118192	0	0	Bacteria	Bacteroidota	Bacteroidia	Chitinophagales	Saprospiraceae			d__Bacteria;p__Bacteroidota;c__Bacteroidia;o__Chitinophagales;f__Saprospiraceae;g__;s__
Aegir_M39_B153	5	74.57	5.042	77.84	3.84	0.409	5701	4769239	0.154595	0	0	0	0	0	0.0343967	0.00269813	0	Bacteria	Bdellovibrionota	Oligoflexia	Oligoflexales				d__Bacteria;p__Bdellovibrionota;c__Oligoflexia;o__Oligoflexales;f__;g__;s__
Aegir_M39_B154	2	98.9	1.098	96.97	0.09	0.523	302300	2593371	0	0	0	0	0	0	0.32608	0	0	Bacteria	Krumholzibacteriota	Krumholzibacteria	Krumholzibacteriales	Krumholzibacteriaceae	4484-7		d__Bacteria;p__Krumholzibacteriota;c__Krumholzibacteria;o__Krumholzibacteriales;f__Krumholzibacteriaceae;g__4484-7;s__
Aegir_M39_B155	2	95.69	5.376	92.99	0.99	0.612	79255	5439434	0.0104683	0.000604243	0	0	0	0	0.367084	0	0	Bacteria	Planctomycetota	UBA1135	UBA2386	GCA-002748355	JAJRTL01		d__Bacteria;p__Planctomycetota;c__UBA1135;o__UBA2386;f__GCA-002748355;g__JAJRTL01;s__
Aegir_M39_B156	1	59.53	0	94.63	0.19	0.343	86086	717064	0	0	0	0	0	0	0.0976275	0	0	Bacteria	Patescibacteria	Paceibacteria	Paceibacterales	JAGGXC01	JAGGXC01		d__Bacteria;p__Patescibacteria;c__Paceibacteria;o__Paceibacterales;f__JAGGXC01;g__JAGGXC01;s__
Aegir_M39_B157	0	96.11	0	95.65	1.63	0.502	44815	1270780	0	0	0	0	0	0.0140591	0.0775243	0	0	Archaea	Thermoproteota	Nitrososphaeria_A	Caldarchaeales	Wolframiiraptoraceae	Wolframiiraptor		d__Archaea;p__Thermoproteota;c__Nitrososphaeria_A;o__Caldarchaeales;f__Wolframiiraptoraceae;g__Wolframiiraptor;s__
Aegir_M39_B158	4	75.03	1.733	73.37	0.76	0.566	8034	2554499	0.11934	0.014962	0	0.0446799	0.00737207	0.0456019	0.0265294	0.00390712	0	Bacteria	Pseudomonadota	Alphaproteobacteria	Rhodobacterales	Rhodobacteraceae	UBA3077		d__Bacteria;p__Pseudomonadota;c__Alphaproteobacteria;o__Rhodobacterales;f__Rhodobacteraceae;g__UBA3077;s__
Aegir_M39_B159	1	78.11	3.225	76.34	0.42	0.639	7016	2403265	0.00119065	0.00611265	0	0.00203674	0	0	0.0567343	0	0	Bacteria	Planctomycetota	SZUA-567	JAFGGJ01	JAFGGJ01			d__Bacteria;p__Planctomycetota;c__SZUA-567;o__JAFGGJ01;f__JAFGGJ01;g__;s__
Aegir_M39_B16	2	50.44	8.777	61.05	9.36	0.581	6204	2772691	0.0228066	0.00161058	0	0.00348736	0.00736049	0.00194639	0.0565144	0.00277895	0	Bacteria	Pseudomonadota	Alphaproteobacteria	Rhodobacterales	Rhodobacteraceae	NVQY01		d__Bacteria;p__Pseudomonadota;c__Alphaproteobacteria;o__Rhodobacterales;f__Rhodobacteraceae;g__NVQY01;s__
Aegir_M39_B160	4	94.36	1.897	89.84	2.76	0.528	10539	2926961	0.00717796	0.0116248	0	0	0.0212057	0.0142602	0.0614881	0	0	Bacteria	Pseudomonadota	Gammaproteobacteria	Arenicellales	LS-SOB	JAAELZ01		d__Bacteria;p__Pseudomonadota;c__Gammaproteobacteria;o__Arenicellales;f__LS-SOB;g__JAAELZ01;s__
Aegir_M39_B161	2	100	0	99.78	0.38	0.436	33636	2320992	0	0.00108647	0	0.0023799	0	0.0226243	0.167877	0	0	Archaea	Halobacteriota	Archaeoglobi	Archaeoglobales	Archaeoglobaceae	Archaeoglobus_A		d__Archaea;p__Halobacteriota;c__Archaeoglobi;o__Archaeoglobales;f__Archaeoglobaceae;g__Archaeoglobus_A;s__
Aegir_M39_B163	4	95.95	0.528	92.29	0.42	0.494	38817	1914373	0	0.0679186	0.0124873	0.00576736	0	0	0.0985439	0	0	Bacteria	Pseudomonadota	Gammaproteobacteria	Nitrosococcales	Methylophagaceae			d__Bacteria;p__Pseudomonadota;c__Gammaproteobacteria;o__Nitrosococcales;f__Methylophagaceae;g__;s__
Aegir_M39_B164	6	96.45	3.41	98.29	1.27	0.537	29438	7346280	0.0852631	0.000511682	0	0	0	0.00337389	0.0711637	0.00889609	0	Bacteria	Myxococcota	Polyangia	Haliangiales	Haliangiaceae	NORP324		d__Bacteria;p__Myxococcota;c__Polyangia;o__Haliangiales;f__Haliangiaceae;g__NORP324;s__
Aegir_M39_B165	0	95.76	2.179	94.82	1.64	0.367	13662	2025331	0.02385	0.00435067	0	0.0261533	0.0288446	0.0102926	0.0480992	0.00197112	0	Bacteria	Campylobacterota	Campylobacteria	Campylobacterales	QNZT01	JANTGR01		d__Bacteria;p__Campylobacterota;c__Campylobacteria;o__Campylobacterales;f__QNZT01;g__JANTGR01;s__
Aegir_M39_B166	4	93.11	5.853	100	4.04	0.554	22201	3116574	0.350959	0.0109377	0	0.04443	0.0291257	0.0146553	0.142613	0.0161162	0	Bacteria	Pseudomonadota	Alphaproteobacteria	Rhodobacterales	Rhodobacteraceae	UBA3077		d__Bacteria;p__Pseudomonadota;c__Alphaproteobacteria;o__Rhodobacterales;f__Rhodobacteraceae;g__UBA3077;s__
Aegir_M39_B167	2	84.48	3.939	85.89	4.65	0.621	5969	4376391	0.0216516	0.0137079	0	0	0	0	0.0241928	0	0	Bacteria	Chloroflexota	Anaerolineae	Caldilineales	Caldilineaceae	JAJRVT01		d__Bacteria;p__Chloroflexota;c__Anaerolineae;o__Caldilineales;f__Caldilineaceae;g__JAJRVT01;s__
Aegir_M39_B168	2	94.74	1.076	97.46	1.03	0.482	30805	2627500	0.00211943	0.00101285	0	0	0	0	0.111363	0	0	Bacteria	Pseudomonadota	Gammaproteobacteria	Xanthomonadales	SZUA-36	SZUA-51		d__Bacteria;p__Pseudomonadota;c__Gammaproteobacteria;o__Xanthomonadales;f__SZUA-36;g__SZUA-51;s__
Aegir_M39_B169	0	96.59	1.136	91.87	0.5	0.534	28419	2750735	0.025944	0.0160295	0	0.0183795	0.00196582	0	0.0474739	0.00922145	0.00158945	Bacteria	Planctomycetota	Phycisphaerae	Phycisphaerales	UBA1924	UBA1924		d__Bacteria;p__Planctomycetota;c__Phycisphaerae;o__Phycisphaerales;f__UBA1924;g__UBA1924;s__
Aegir_M39_B17	3	96.95	1.626	99.94	0.1	0.381	65497	1754731	0	0.163422	0.0133417	0.00474004	0	0	0.0864347	0	0.0726897	Bacteria	Aquificota	Aquificae	Hydrogenothermales	Hydrogenothermaceae	Persephonella		d__Bacteria;p__Aquificota;c__Aquificae;o__Hydrogenothermales;f__Hydrogenothermaceae;g__Persephonella;s__
Aegir_M39_B170	1	95.79	0	99.51	0.24	0.369	160492	2513398	0.0119489	0.000767237	0	0.00277344	0	0.00174822	0.366616	0	0	Bacteria	Bacteroidota	Kapabacteria	Kapabacteriales	UBA2268			d__Bacteria;p__Bacteroidota;c__Kapabacteria;o__Kapabacteriales;f__UBA2268;g__;s__
Aegir_M39_B171	1	78.71	3.688	76.07	1.26	0.36	9475	1490210	0.0163284	0.0290482	0.781893	0.00382208	0	0.0181305	0.447916	0.00117811	0.000865914	Bacteria	Campylobacterota	Campylobacteria	Campylobacterales	Sulfurimonadaceae	Sulfurimonas		d__Bacteria;p__Campylobacterota;c__Campylobacteria;o__Campylobacterales;f__Sulfurimonadaceae;g__Sulfurimonas;s__
Aegir_M39_B172	3	97.86	0.854	99.99	0.06	0.674	58422	3313006	0.00743487	0.00773791	0	0	0	0.00957365	0.568913	0	0	Bacteria	Acidobacteriota	Thermoanaerobaculia	Thermoanaerobaculales	Sulfomarinibacteraceae	JAADFK01		d__Bacteria;p__Acidobacteriota;c__Thermoanaerobaculia;o__Thermoanaerobaculales;f__Sulfomarinibacteraceae;g__JAADFK01;s__
Aegir_M39_B173	2	88.64	2.696	86.35	4.22	0.641	7597	1380370	0	0.00134479	0	0	0	0.0203821	0.0588262	0.00184913	0	Bacteria	Bipolaricaulota	Bipolaricaulia	UBA7950	UBA9294	S016-54		d__Bacteria;p__Bipolaricaulota;c__Bipolaricaulia;o__UBA7950;f__UBA9294;g__S016-54;s__
Aegir_M39_B174	7	93.73	0.413	94.21	0	0.405	18950	2410030	0.00735277	0.00721747	0	0	0	0	0.072605	0	0	Bacteria	Pseudomonadota	Gammaproteobacteria	Methylococcales	Methylomonadaceae			d__Bacteria;p__Pseudomonadota;c__Gammaproteobacteria;o__Methylococcales;f__Methylomonadaceae;g__;s__
Aegir_M39_B175	3	95.63	2.54	100	0.15	0.467	16458	2030576	0.00302756	0.0152234	0	0.00365682	0	0.000929806	0.0374804	0	0	Bacteria	Pseudomonadota	Gammaproteobacteria	Arenicellales	LS-SOB	JAAELZ01		d__Bacteria;p__Pseudomonadota;c__Gammaproteobacteria;o__Arenicellales;f__LS-SOB;g__JAAELZ01;s__
Aegir_M39_B176	0	96.8	1.2	95.98	2.3	0.38	53457	3272164	0	0.00176004	0	0.0156241	0	0.00252672	0.106276	0.0036968	0.00136925	Bacteria	Spirochaetota	Spirochaetia	SZUA-6	SZUA-6			d__Bacteria;p__Spirochaetota;c__Spirochaetia;o__SZUA-6;f__SZUA-6;g__;s__
Aegir_M39_B177	1	98.38	1.612	98.7	0.25	0.369	36750	3247009	0.0522294	0.0290736	0	0.429535	0.00407319	0.00424842	0.297681	0	0	Bacteria	Bacteroidota	Bacteroidia	Flavobacteriales	Salibacteraceae	CAJXZP01		d__Bacteria;p__Bacteroidota;c__Bacteroidia;o__Flavobacteriales;f__Salibacteraceae;g__CAJXZP01;s__
Aegir_M39_B178	6	94.72	1.612	87.87	2.56	0.649	33794	4896725	0.0845696	0	0	0.00492296	0	0	0.0433748	0	0	Bacteria	Planctomycetota	UBA1135	UBA1135	GCA-002686595	RBC036		d__Bacteria;p__Planctomycetota;c__UBA1135;o__UBA1135;f__GCA-002686595;g__RBC036;s__
Aegir_M39_B179	1	97.74	0.537	97.37	0.08	0.346	42236	2678258	0	0.0318771	0.0766394	0.0247024	0	0	0.109527	0	0	Bacteria	Bacteroidota	Bacteroidia	Bacteroidales	S143-33	S143-33		d__Bacteria;p__Bacteroidota;c__Bacteroidia;o__Bacteroidales;f__S143-33;g__S143-33;s__
Aegir_M39_B18	5	98.65	0.537	97.7	0.65	0.316	37538	3303684	0	0.00087923	0	0	0.00263454	0.00226384	0.135423	0.000839346	0	Bacteria	Bacteroidota	Bacteroidia	Bacteroidales	JAADGE01	JAADGE01		d__Bacteria;p__Bacteroidota;c__Bacteroidia;o__Bacteroidales;f__JAADGE01;g__JAADGE01;s__
Aegir_M39_B180	3	94.83	0.967	93.69	1.14	0.481	18606	2956869	0.00277657	0.00311819	0	0.0117975	0	0.0282406	0.522235	0	0	Bacteria	Desulfobacterota	DSM-4660	Desulfatiglandales	Desulfatiglandaceae	B111-G9		d__Bacteria;p__Desulfobacterota;c__DSM-4660;o__Desulfatiglandales;f__Desulfatiglandaceae;g__B111-G9;s__
Aegir_M39_B181	6	94.83	3.225	98.05	1.16	0.691	25158	6132865	0.00287287	0	0	0.0699651	0	0.00192402	0.0568208	0	0	Bacteria	Myxococcota	Polyangia	Polyangiales	SG8-38	JAADHO01		d__Bacteria;p__Myxococcota;c__Polyangia;o__Polyangiales;f__SG8-38;g__JAADHO01;s__
Aegir_M39_B182	4	99.16	2.424	100	0.82	0.58	39222	3239704	0.130225	0.0487222	0	0.386132	0.00193723	0.00618886	0.447259	0	0	Bacteria	Pseudomonadota	Alphaproteobacteria	Rhodobacterales	Rhodobacteraceae	Profundibacter	Profundibacter amoris	d__Bacteria;p__Pseudomonadota;c__Alphaproteobacteria;o__Rhodobacterales;f__Rhodobacteraceae;g__Profundibacter;s__Profundibacter amoris
Aegir_M39_B183	4	95.34	1.29	96.46	4.64	0.591	19185	3544792	0	0	0	0	0	0.00395949	0.0715345	0	0	Bacteria	Desulfobacterota_F	JdFR-97	JdFR-97	JdFR-97	JdFR-97		d__Bacteria;p__Desulfobacterota_F;c__JdFR-97;o__JdFR-97;f__JdFR-97;g__JdFR-97;s__
Aegir_M39_B184	1	95.32	3.271	90.96	2.91	0.339	24302	3006912	0	0.00158841	0	0.0089451	0	0.000951147	0.169519	0	0	Archaea	Asgardarchaeota	Heimdallarchaeia	UBA460	UBA460			d__Archaea;p__Asgardarchaeota;c__Heimdallarchaeia;o__UBA460;f__UBA460;g__;s__
Aegir_M39_B185	8	91.87	2.747	94.86	0.65	0.438	17471	5328724	0.00134861	0	0	0	0	0.00317592	0.0778414	0.000811754	0	Bacteria	JdFR-76	JdFR-76	JdFR-76	DREG01	DREG01		d__Bacteria;p__JdFR-76;c__JdFR-76;o__JdFR-76;f__DREG01;g__DREG01;s__
Aegir_M39_B186	6	72.92	3.847	72.39	2.24	0.373	9420	2727203	0.0122435	0.00633021	0	0	0.0724466	0.00494718	0.0738707	0.016942	0	Bacteria	Pseudomonadota	Gammaproteobacteria	Methylococcales	Methylomonadaceae	QPIN01		d__Bacteria;p__Pseudomonadota;c__Gammaproteobacteria;o__Methylococcales;f__Methylomonadaceae;g__QPIN01;s__
Aegir_M39_B187	1	96.34	0	96.21	0.5	0.298	22536	1481325	0	0.16386	0.522432	0.0125175	0	0	0.0516434	0	0.319783	Bacteria	Aquificota	Aquificae	Hydrogenothermales	Hydrogenothermaceae	QNZC01		d__Bacteria;p__Aquificota;c__Aquificae;o__Hydrogenothermales;f__Hydrogenothermaceae;g__QNZC01;s__
Aegir_M39_B188	10	93.54	5	93.9	1.22	0.555	16571	4561084	0	0.00155306	0	0.0147345	0	0.0017151	0.0726072	0	0	Bacteria	Myxococcota	JAADFL01	JAADFL01	JAADFL01			d__Bacteria;p__Myxococcota;c__JAADFL01;o__JAADFL01;f__JAADFL01;g__;s__
Aegir_M39_B189	0	97.38	0.653	96.52	0.29	0.397	25383	1844816	0	0.0015718	0	0	0	0.0493496	0.127711	0	0	Archaea	Halobacteriota	Archaeoglobi	Archaeoglobales	Archaeoglobaceae	B5-G16		d__Archaea;p__Halobacteriota;c__Archaeoglobi;o__Archaeoglobales;f__Archaeoglobaceae;g__B5-G16;s__
Aegir_M39_B19	5	91.55	4.054	92.2	0.78	0.429	26426	3098926	0.0284026	0	0	0.00590789	0.0328036	0.00623599	0.162632	0	0	Bacteria	Verrucomicrobiota	Kiritimatiellia	UBA8416	JAFGTH01			d__Bacteria;p__Verrucomicrobiota;c__Kiritimatiellia;o__UBA8416;f__JAFGTH01;g__;s__
Aegir_M39_B190	2	98.35	2.795	98.86	2	0.544	54916	3432340	0.101847	0.0534999	0	0.00965165	0	0	0.0412648	0.0042777	0.0307209	Bacteria	Pseudomonadota	Gammaproteobacteria	UWMA-0217	UWMA-0217			d__Bacteria;p__Pseudomonadota;c__Gammaproteobacteria;o__UWMA-0217;f__UWMA-0217;g__;s__
Aegir_M39_B191	4	93	3.39	99.18	0.84	0.394	12853	2876365	0.359023	0.124198	0	2.89479	0.158281	0.017434	1.5887	0	0	Bacteria	Pseudomonadota	Gammaproteobacteria	Methylococcales	Methylomonadaceae	Methyloprofundus	Methyloprofundus sp900128525	d__Bacteria;p__Pseudomonadota;c__Gammaproteobacteria;o__Methylococcales;f__Methylomonadaceae;g__Methyloprofundus;s__Methyloprofundus sp900128525
Aegir_M39_B192	8	93.27	3.045	92.39	1.3	0.412	26772	3235504	0.312343	0.0103045	0	0	0.209757	0.00636242	0.116507	0.00595221	0	Bacteria	Pseudomonadota	Gammaproteobacteria	Methylococcales	Methylomonadaceae	QPIN01		d__Bacteria;p__Pseudomonadota;c__Gammaproteobacteria;o__Methylococcales;f__Methylomonadaceae;g__QPIN01;s__
Aegir_M39_B193	1	96.32	1.47	99.06	4.14	0.359	42482	2018304	0	0	0	0	0	0.0231876	0.0830688	0	0	Archaea	Thermoproteota	Thermoprotei	Thermofilales	B69-G16	B69-G16		d__Archaea;p__Thermoproteota;c__Thermoprotei;o__Thermofilales;f__B69-G16;g__B69-G16;s__
Aegir_M39_B194	6	81.14	1.635	77.26	1.23	0.447	5491	2895714	0	0	0	0	0	0.00165218	0.0504867	0	0	Bacteria	Desulfobacterota	Desulfobacteria	Desulfobacterales	UBA11574			d__Bacteria;p__Desulfobacterota;c__Desulfobacteria;o__Desulfobacterales;f__UBA11574;g__;s__
Aegir_M39_B195	11	93.22	1.451	96.12	2.51	0.561	13073	3851575	0.00359992	0	0	0.00210592	0	0.00541632	0.0683994	0	0	Bacteria	Desulfobacterota	DSM-4660	Desulfatiglandales	Desulfatiglandaceae	Desulfacyla		d__Bacteria;p__Desulfobacterota;c__DSM-4660;o__Desulfatiglandales;f__Desulfatiglandaceae;g__Desulfacyla;s__
Aegir_M39_B196	9	94.49	1.003	92.92	0.8	0.593	11483	3851995	0.0105411	0.00181952	0	0.00121168	0	0.00190498	0.0766049	0	0	Bacteria	Desulfobacterota	Desulfobacteria	Desulfobacterales	JAABRJ01			d__Bacteria;p__Desulfobacterota;c__Desulfobacteria;o__Desulfobacterales;f__JAABRJ01;g__;s__
Aegir_M39_B197	0	76.06	0.198	81.02	0.02	0.416	8988	841632	0	0	0	0	0	0.00192907	0.0552309	0	0	Bacteria	Patescibacteria	Gracilibacteria	UBA1369	LOWO2-01-FULL-3	JAACEU01		d__Bacteria;p__Patescibacteria;c__Gracilibacteria;o__UBA1369;f__LOWO2-01-FULL-3;g__JAACEU01;s__
Aegir_M39_B198	3	95.53	3.67	99.34	0.68	0.432	46467	5903806	0.00545222	0.000894544	0	0	0.00532994	0	0.0903103	0	0	Bacteria	Bacteroidota	Bacteroidia	Cytophagales	Cyclobacteriaceae			d__Bacteria;p__Bacteroidota;c__Bacteroidia;o__Cytophagales;f__Cyclobacteriaceae;g__;s__
Aegir_M39_B199	2	72.07	4.316	67.79	2.6	0.282	6772	1991148	0.0167607	0.0357754	0.00335754	0.0691217	0.00862815	0.00409874	0.234888	0	0.00150723	Bacteria	Bacteroidota	Bacteroidia	Flavobacteriales	Flavobacteriaceae			d__Bacteria;p__Bacteroidota;c__Bacteroidia;o__Flavobacteriales;f__Flavobacteriaceae;g__;s__
Aegir_M39_B2	4	89.22	4.674	94.53	1.24	0.415	8801	1889536	0.0126772	0.012368	0	0.00290594	0.0211535	0.0183482	0.0772312	0.0017631	0	Bacteria	Campylobacterota	Campylobacteria	Campylobacterales	Sulfurimonadaceae	S145-25		d__Bacteria;p__Campylobacterota;c__Campylobacteria;o__Campylobacterales;f__Sulfurimonadaceae;g__S145-25;s__
Aegir_M39_B20	18	87.29	1.351	95.58	0.7	0.365	10805	4719045	0.0826188	0	0	0	0	0.00324373	0.0349849	0.0118666	0	Bacteria	Bacteroidota	Bacteroidia	Flavobacteriales	Crocinitomicaceae	Crocinitomix		d__Bacteria;p__Bacteroidota;c__Bacteroidia;o__Flavobacteriales;f__Crocinitomicaceae;g__Crocinitomix;s__
Aegir_M39_B21	1	63.3	1.093	59.52	1.41	0.473	3818	1761795	0	0.090316	0	0.0147298	0	0.00213585	0.0222663	0	0	Bacteria	Bacteroidota	Bacteroidia	Bacteroidales	UBA1556			d__Bacteria;p__Bacteroidota;c__Bacteroidia;o__Bacteroidales;f__UBA1556;g__;s__
Aegir_M39_B22	0	72.24	1.96	73.57	0.37	0.432	4385	1636738	0	0	0	0.00200562	0	0.00775308	0.0458587	0	0	Archaea	Halobacteriota	Archaeoglobi	Archaeoglobales	Archaeoglobaceae	Archaeoglobus		d__Archaea;p__Halobacteriota;c__Archaeoglobi;o__Archaeoglobales;f__Archaeoglobaceae;g__Archaeoglobus;s__
Aegir_M39_B23	6	95.05	1.695	100	1.09	0.451	28659	3088671	0.0139084	0.01229	0	0	0	0	0.984334	0	0	Bacteria	Pseudomonadota	Gammaproteobacteria	Methylococcales	Methylomonadaceae			d__Bacteria;p__Pseudomonadota;c__Gammaproteobacteria;o__Methylococcales;f__Methylomonadaceae;g__;s__
Aegir_M39_B24	3	89.68	4.343	87.54	1.57	0.556	11739	3237490	0.20879	0.00990656	0	0.003859	0.0129431	0.00596745	0.0275694	0.00646877	0	Bacteria	Pseudomonadota	Alphaproteobacteria	Rhodobacterales	Rhodobacteraceae	Profundibacter		d__Bacteria;p__Pseudomonadota;c__Alphaproteobacteria;o__Rhodobacterales;f__Rhodobacteraceae;g__Profundibacter;s__
Aegir_M39_B25	22	93.01	2.15	89.41	0.54	0.436	13438	3653205	0.242726	0	0	0.00206123	0	0	0.151201	0.000873501	0	Bacteria	Planctomycetota	JADGBV01	JADGBV01	JADGBV01			d__Bacteria;p__Planctomycetota;c__JADGBV01;o__JADGBV01;f__JADGBV01;g__;s__
Aegir_M39_B26	1	86.36	0	91.78	4.54	0.667	23681	3702837	0	0.00327293	0	0.00712158	0	0.00905841	0.168565	0	0	Bacteria	Chloroflexota	Anaerolineae	B4-G1	DUEL01	SZUA-1492		d__Bacteria;p__Chloroflexota;c__Anaerolineae;o__B4-G1;f__DUEL01;g__SZUA-1492;s__
Aegir_M39_B27	2	52.81	4.237	51.88	3.84	0.61	3570	1263612	0	0.0106323	0	0.00208152	0	0.00145071	0.0366643	0	0	Bacteria	WOR-3	Hydrothermia					d__Bacteria;p__WOR-3;c__Hydrothermia;o__;f__;g__;s__
Aegir_M39_B28	0	67.65	0.909	72.38	4.72	0.622	4838	3137162	0.00424071	0.00245175	0	0.0151108	0	0	0.0520649	0	0	Bacteria	Chloroflexota	Anaerolineae	Aggregatilineales	Aggregatilineaceae	UBA2029		d__Bacteria;p__Chloroflexota;c__Anaerolineae;o__Aggregatilineales;f__Aggregatilineaceae;g__UBA2029;s__
Aegir_M39_B29	9	62.66	2.747	70.03	1.94	0.461	4052	2996074	0	0.0240472	0	0.00149798	0	0	0.0266725	0	0.00361671	Bacteria	Calditrichota	Calditrichia	Calditrichales	Calditrichaceae	Caldithrix		d__Bacteria;p__Calditrichota;c__Calditrichia;o__Calditrichales;f__Calditrichaceae;g__Caldithrix;s__
Aegir_M39_B3	3	90.6	2	95.54	1.03	0.498	15333	3915896	0.00563787	0.00792343	0	0.0213743	0.036263	0	0.0320617	0	0	Bacteria	Chloroflexota	Anaerolineae	Promineofilales	Promineofilaceae	S016-13		d__Bacteria;p__Chloroflexota;c__Anaerolineae;o__Promineofilales;f__Promineofilaceae;g__S016-13;s__
Aegir_M39_B30	3	94.71	2.09	94.66	1.44	0.315	17594	1757448	0	0.226486	0	0	0	0	0.0378384	0	0.150909	Bacteria	Aquificota	Aquificae	Hydrogenothermales	Hydrogenothermaceae	JAADDV01		d__Bacteria;p__Aquificota;c__Aquificae;o__Hydrogenothermales;f__Hydrogenothermaceae;g__JAADDV01;s__
Aegir_M39_B31	5	76.99	3.136	79.52	3.46	0.385	6407	2317728	0.00726743	0.00367529	0	0.00728286	0.0373469	0.00336027	0.0340977	0.000795687	0	Bacteria	Bacteroidota	Bacteroidia	Bacteroidales	F082	B16-G9		d__Bacteria;p__Bacteroidota;c__Bacteroidia;o__Bacteroidales;f__F082;g__B16-G9;s__
Aegir_M39_B32	4	92.11	3.225	94.51	1.62	0.621	12702	6595257	0.0305426	0	0	0	0	0	0.0663904	0	0.000786161	Bacteria	Myxococcota	Polyangia	Haliangiales	Haliangiaceae			d__Bacteria;p__Myxococcota;c__Polyangia;o__Haliangiales;f__Haliangiaceae;g__;s__
Aegir_M39_B33	3	79.56	4.268	70.75	5.05	0.527	4649	1464483	0	0.063962	0.867868	0	0	0	0.0609139	0	0.412368	Bacteria	Pseudomonadota	Gammaproteobacteria	Thiomicrospirales	Thiomicrospiraceae	Sulfurivirga		d__Bacteria;p__Pseudomonadota;c__Gammaproteobacteria;o__Thiomicrospirales;f__Thiomicrospiraceae;g__Sulfurivirga;s__
Aegir_M39_B34	10	86.23	0.806	87.07	0.67	0.517	6492	3113047	0	0	0	0	0	0.000958558	0.0504393	0	0	Bacteria	Desulfobacterota	Syntrophobacteria	Syntrophobacterales	Syntrophobacteraceae			d__Bacteria;p__Desulfobacterota;c__Syntrophobacteria;o__Syntrophobacterales;f__Syntrophobacteraceae;g__;s__
Aegir_M39_B35	5	72.69	1.935	79.47	0.08	0.46	5348	4469805	0.0853228	0	0	0.00224586	0.00309948	0.00169866	0.0247863	0.0014493	0	Bacteria	Myxococcota	Bradymonadia	Bradymonadales	Bradymonadaceae			d__Bacteria;p__Myxococcota;c__Bradymonadia;o__Bradymonadales;f__Bradymonadaceae;g__;s__
Aegir_M39_B36	0	97.02	1.485	100	0.46	0.337	53764	3337687	0.0217665	0.0109341	0	0.161188	0	0	0.0453138	0	0	Bacteria	Bacteroidota	Bacteroidia	Chitinophagales	Saprospiraceae			d__Bacteria;p__Bacteroidota;c__Bacteroidia;o__Chitinophagales;f__Saprospiraceae;g__;s__
Aegir_M39_B37	0	84.75	2.71	89.36	2.11	0.316	9506	2334645	0	0.000843948	0	0	0	0	0.0612008	0.0179579	0	Bacteria	Acidobacteriota	Aminicenantia	JAMOAD01	JAMOAD01			d__Bacteria;p__Acidobacteriota;c__Aminicenantia;o__JAMOAD01;f__JAMOAD01;g__;s__
Aegir_M39_B38	1	90	2.727	91.22	2.29	0.603	21597	3690364	0.00317509	0.00512504	0	0.0227093	0	0.0181727	0.206867	0.00539802	0	Bacteria	Chloroflexota	Anaerolineae	B4-G1	B4-G1	B4-G1		d__Bacteria;p__Chloroflexota;c__Anaerolineae;o__B4-G1;f__B4-G1;g__B4-G1;s__
Aegir_M39_B39	7	91.29	3.548	94.17	2.81	0.609	89644	5105721	0.0382999	0.00146704	0	0	0.00544673	0.000910238	0.439523	0.00179855	0	Bacteria	Myxococcota_A	UBA9160	UBA9160	UBA4427	UBA4427		d__Bacteria;p__Myxococcota_A;c__UBA9160;o__UBA9160;f__UBA4427;g__UBA4427;s__
Aegir_M39_B4	0	89.37	1.111	85.69	0.19	0.4	6625	1671175	0	0	0	0	0	0.0168297	0.0570437	0	0	Archaea	Halobacteriota	Archaeoglobi	Archaeoglobales	Archaeoglobaceae	JdFR-22		d__Archaea;p__Halobacteriota;c__Archaeoglobi;o__Archaeoglobales;f__Archaeoglobaceae;g__JdFR-22;s__
Aegir_M39_B40	3	94.59	1.081	90	0.41	0.405	51851	3174017	0.0954242	0.000750802	0	0.00256597	0	0.00419829	0.586453	0	0.00100407	Bacteria	Pseudomonadota	Gammaproteobacteria	Enterobacterales_A	GCA-002770795	DRNA01		d__Bacteria;p__Pseudomonadota;c__Gammaproteobacteria;o__Enterobacterales_A;f__GCA-002770795;g__DRNA01;s__
Aegir_M39_B41	1	95.33	2.142	96.6	0.03	0.4	40910	3777085	0.0339071	0	0	0	0	0	0.0501855	0	0	Bacteria	Bacteroidota	Bacteroidia	Cytophagales	Cyclobacteriaceae	S012-113		d__Bacteria;p__Bacteroidota;c__Bacteroidia;o__Cytophagales;f__Cyclobacteriaceae;g__S012-113;s__
Aegir_M39_B42	0	92.23	2.912	90.94	2.64	0.357	221369	1727447	0	0	0	0	0	0.0262807	0.199239	0	0	Archaea	Thermoproteota	Nitrososphaeria	Geothermarchaeales	JDFR-13	B109-G9		d__Archaea;p__Thermoproteota;c__Nitrososphaeria;o__Geothermarchaeales;f__JDFR-13;g__B109-G9;s__
Aegir_M39_B43	1	75.78	7.017	69.76	3.37	0.355	8089	1604405	0.0135506	0.115264	2.22671	0.00847418	0.00322467	0.0281142	0.168486	0.00157838	0	Bacteria	Campylobacterota	Campylobacteria	Campylobacterales	Sulfurimonadaceae	Sulfurimonas		d__Bacteria;p__Campylobacterota;c__Campylobacteria;o__Campylobacterales;f__Sulfurimonadaceae;g__Sulfurimonas;s__
Aegir_M39_B44	1	89.83	1.694	93.77	2.85	0.662	32648	1915144	0	0.00398463	0	0.0110223	0	0.030531	0.424285	0.00436503	0	Bacteria	Bipolaricaulota	Bipolaricaulia	Bipolaricaulales	Bipolaricaulaceae	UBA3574		d__Bacteria;p__Bipolaricaulota;c__Bipolaricaulia;o__Bipolaricaulales;f__Bipolaricaulaceae;g__UBA3574;s__
Aegir_M39_B45	1	91.17	0.653	94.62	0.26	0.474	25073	1569235	0	0	0	0	0	0.399483	1.74094	0.00488365	0	Archaea	Halobacteriota	Syntropharchaeia	ANME-1	ANME-1	G60ANME1		d__Archaea;p__Halobacteriota;c__Syntropharchaeia;o__ANME-1;f__ANME-1;g__G60ANME1;s__
Aegir_M39_B46	0	86.77	0.811	94.93	0.21	0.493	16455	2368948	0.0659718	0.0157986	0	0.00883814	0	0.00166092	0.15602	0.00296425	0	Bacteria	Pseudomonadota	Alphaproteobacteria	Caulobacterales	Maricaulaceae	Robiginitomaculum_A		d__Bacteria;p__Pseudomonadota;c__Alphaproteobacteria;o__Caulobacterales;f__Maricaulaceae;g__Robiginitomaculum_A;s__
Aegir_M39_B47	4	84.35	0.261	91.39	0.06	0.7	10986	3003007	0	0.0289444	0	0.001678	0	0	0.0358278	0	0.0041648	Bacteria	Acidobacteriota	Thermoanaerobaculia	Thermoanaerobaculales				d__Bacteria;p__Acidobacteriota;c__Thermoanaerobaculia;o__Thermoanaerobaculales;f__;g__;s__
Aegir_M39_B48	2	96.55	2.597	97.69	1.05	0.371	28942	3379555	0.0252036	0.00862565	0	0.010768	0.017747	0.00666238	0.210817	0	0.00318936	Bacteria	Pseudomonadota	Gammaproteobacteria	Xanthomonadales	Marinicellaceae	NORP309		d__Bacteria;p__Pseudomonadota;c__Gammaproteobacteria;o__Xanthomonadales;f__Marinicellaceae;g__NORP309;s__
Aegir_M39_B49	4	91.61	2.58	95.07	0.44	0.64	73034	4271081	0.0336159	0.000621951	0	0	0	0	0.0544512	0	0.00583124	Bacteria	Myxococcota_A	UBA9160	UBA9160	UBA4427	UBA4427		d__Bacteria;p__Myxococcota_A;c__UBA9160;o__UBA9160;f__UBA4427;g__UBA4427;s__
Aegir_M39_B5	1	78.66	0.055	76.99	0.04	0.288	59263	1925877	0.00548056	0.00166842	0	0.1575	0.00687011	0.0019023	0.329375	0	0	Bacteria	Bacteroidota	Bacteroidia	Flavobacteriales	Flavobacteriaceae	S010-17		d__Bacteria;p__Bacteroidota;c__Bacteroidia;o__Flavobacteriales;f__Flavobacteriaceae;g__S010-17;s__
Aegir_M39_B50	0	99.93	3.296	99.06	0	0.473	73087	3023970	0	0	0	0	0	0.00228256	0.12532	0	0	Bacteria	Zixibacteria	MSB-5A5	JAABVY01	JAHJOQ01	JAJRZO01		d__Bacteria;p__Zixibacteria;c__MSB-5A5;o__JAABVY01;f__JAHJOQ01;g__JAJRZO01;s__
Aegir_M39_B51	2	92.9	2.173	96.03	2.31	0.35	24647	1862715	0	0.201672	0	0.00137572	0	0	0.0602011	0	0	Bacteria	Desulfobacterota	DSM-4660	Desulfatiglandales	Desulfatiglandaceae			d__Bacteria;p__Desulfobacterota;c__DSM-4660;o__Desulfatiglandales;f__Desulfatiglandaceae;g__;s__
Aegir_M39_B52	1	97.31	0	99.18	0.05	0.318	45933	3848539	0.00675593	0.00753836	0.000535309	0.0315755	0	0	0.0506338	0	0	Bacteria	Bacteroidota	Bacteroidia	Bacteroidales	NBLH01	NBLH01		d__Bacteria;p__Bacteroidota;c__Bacteroidia;o__Bacteroidales;f__NBLH01;g__NBLH01;s__
Aegir_M39_B53	4	70.14	0.862	80.58	3.55	0.397	7454	1902703	0.134112	0.11941	0.00490925	1.57746	0.027941	0.0120333	0.937995	0.0526205	0	Bacteria	Pseudomonadota	Gammaproteobacteria	Nitrosococcales	Methylophagaceae	GCA-002733105		d__Bacteria;p__Pseudomonadota;c__Gammaproteobacteria;o__Nitrosococcales;f__Methylophagaceae;g__GCA-002733105;s__
Aegir_M39_B54	1	78.8	2.287	77.16	0.48	0.464	6576	1513396	0	0	0	0	0	0.578653	0.0249954	0	0	Archaea	Halobacteriota	Syntropharchaeia	ANME-1	ANME-1	JANPRD01		d__Archaea;p__Halobacteriota;c__Syntropharchaeia;o__ANME-1;f__ANME-1;g__JANPRD01;s__
Aegir_M39_B55	7	94.25	1.494	96.27	0.01	0.393	56243	2879947	0.274352	0.00441393	0	0	0	0	0.0966387	0	0	Bacteria	Pseudomonadota	Gammaproteobacteria	Methylococcales	Methylomonadaceae	QPIN01		d__Bacteria;p__Pseudomonadota;c__Gammaproteobacteria;o__Methylococcales;f__Methylomonadaceae;g__QPIN01;s__
Aegir_M39_B56	11	97.41	0.86	98.62	1.9	0.554	41402	4615808	0.00138443	0	0	0	0	0	0.141683	0	0	Bacteria	Desulfobacterota	Desulfobacteria	Desulfobacterales	JAFDCJ01			d__Bacteria;p__Desulfobacterota;c__Desulfobacteria;o__Desulfobacterales;f__JAFDCJ01;g__;s__
Aegir_M39_B57	2	86.68	0	94.05	1.33	0.432	8284	2740587	0	0	0	0	0	0.011363	0.0617314	0.00131546	0	Bacteria	JdFR-76	JdFR-76	JdFR-76	4484-219	4484-219		d__Bacteria;p__JdFR-76;c__JdFR-76;o__JdFR-76;f__4484-219;g__4484-219;s__
Aegir_M39_B58	1	75.1	2.533	74	0.22	0.416	6444	918450	0	0.000503965	0	0	0	0.00309554	0.0538999	0	0	Archaea	Thermoplasmatota	E2	DHVEG-1	B18-G2	B18-G2		d__Archaea;p__Thermoplasmatota;c__E2;o__DHVEG-1;f__B18-G2;g__B18-G2;s__
Aegir_M39_B59	0	94.85	4.205	97.19	4.28	0.443	158090	2321953	0	0	0	0	0	0	0.280012	0	0	Archaea	Asgardarchaeota	Thorarchaeia	Thorarchaeales	Thorarchaeaceae	B65-G9		d__Archaea;p__Asgardarchaeota;c__Thorarchaeia;o__Thorarchaeales;f__Thorarchaeaceae;g__B65-G9;s__
Aegir_M39_B6	0	78.88	2.984	78.15	3.41	0.292	6242	1829061	0.00348025	0.0180211	0	0.00801622	0.0046533	0.00179113	0.042099	0.0032676	0	Bacteria	Bacteroidota	Bacteroidia	Flavobacteriales	Flavobacteriaceae	S010-17		d__Bacteria;p__Bacteroidota;c__Bacteroidia;o__Flavobacteriales;f__Flavobacteriaceae;g__S010-17;s__
Aegir_M39_B60	8	93.74	2.258	96.06	3.2	0.505	99840	5114042	0.0161563	0.00069777	0	0.0023009	0	0.00334318	0.181609	0	0	Bacteria	Myxococcota	B64-G9	B64-G9	B64-G9			d__Bacteria;p__Myxococcota;c__B64-G9;o__B64-G9;f__B64-G9;g__;s__
Aegir_M39_B61	0	58.54	0	44.8	0.39	0.686	3313	1753042	0.0337484	0.00757707	0	0.00112865	0	0	0.0140142	0	0.003539	Bacteria	Actinomycetota	Acidimicrobiia	Acidimicrobiales	TK06	DRKF01		d__Bacteria;p__Actinomycetota;c__Acidimicrobiia;o__Acidimicrobiales;f__TK06;g__DRKF01;s__
Aegir_M39_B62	7	90.96	0.645	82.26	2.55	0.423	11491	3248489	0.0182586	0.000516225	0	0.00644154	0.135952	0.00420596	0.0594212	0	0	Bacteria	Desulfobacterota	Desulfobacteria	Desulfobacterales	Desulfobacteraceae	Desulfobacula		d__Bacteria;p__Desulfobacterota;c__Desulfobacteria;o__Desulfobacterales;f__Desulfobacteraceae;g__Desulfobacula;s__
Aegir_M39_B63	6	96.36	0.558	98.72	0.22	0.325	18333	3957988	0.135369	0.00693545	0	0.0136974	0	0.00102677	0.0357949	0	0	Bacteria	Bacteroidota	Ignavibacteria	Ignavibacteriales	Melioribacteraceae	GCA-2746605		d__Bacteria;p__Bacteroidota;c__Ignavibacteria;o__Ignavibacteriales;f__Melioribacteraceae;g__GCA-2746605;s__
Aegir_M39_B64	1	87.27	1.818	92.91	1.34	0.63	49671	3329208	0	0.0429655	0	0.0193834	0	0	0.0558587	0	0	Bacteria	Chloroflexota	Anaerolineae	B4-G1	B4-G1			d__Bacteria;p__Chloroflexota;c__Anaerolineae;o__B4-G1;f__B4-G1;g__;s__
Aegir_M39_B65	0	75.14	2.941	72.33	0.53	0.405	5136	1747862	0	0	0	0	0	0.00406019	0.0508431	0	0	Archaea	Halobacteriota	Archaeoglobi	Archaeoglobales	Archaeoglobaceae	Archaeoglobus_A		d__Archaea;p__Halobacteriota;c__Archaeoglobi;o__Archaeoglobales;f__Archaeoglobaceae;g__Archaeoglobus_A;s__
Aegir_M39_B66	0	96.7	1.098	90.98	2.91	0.64	38116	3000123	0	0	0	0	0	0.0038569	0.0816421	0	0	Bacteria	Krumholzibacteriota	Krumholzibacteria	LZORAL124-64-63	LZORAL124-64-63	JAHJTW01		d__Bacteria;p__Krumholzibacteriota;c__Krumholzibacteria;o__LZORAL124-64-63;f__LZORAL124-64-63;g__JAHJTW01;s__
Aegir_M39_B67	2	54.5	1.006	55.49	1.93	0.286	30969	1637591	0.0948681	0.00713027	0	1.01757	0.0491406	0.00952114	0.220841	0.00380913	0	Bacteria	Bacteroidota	Bacteroidia	Flavobacteriales	Flavobacteriaceae	S010-17		d__Bacteria;p__Bacteroidota;c__Bacteroidia;o__Flavobacteriales;f__Flavobacteriaceae;g__S010-17;s__
Aegir_M39_B68	2	78	0.99	96.17	5.29	0.594	7314	4365926	0	0.0126899	0	0.0374203	0	0	0.0551314	0	0	Bacteria	Myxococcota	Polyangia	HGW-17	SLPX01			d__Bacteria;p__Myxococcota;c__Polyangia;o__HGW-17;f__SLPX01;g__;s__
Aegir_M39_B69	3	93.54	1.612	88.76	1.02	0.654	25951	5890141	0.103395	0	0	0	0	0	0.0583188	0	0	Bacteria	Planctomycetota	UBA1135	UBA1135	GCA-002686595	GCA-2862085		d__Bacteria;p__Planctomycetota;c__UBA1135;o__UBA1135;f__GCA-002686595;g__GCA-2862085;s__
Aegir_M39_B7	4	54.07	3.225	61.4	2.17	0.566	3373	2239230	0	0	0	0.00149703	0	0.00155275	0.047641	0	0	Bacteria	Desulfobacterota	JACQYL01	JACQYL01				d__Bacteria;p__Desulfobacterota;c__JACQYL01;o__JACQYL01;f__;g__;s__
Aegir_M39_B70	1	71.36	1.01	78.68	0.48	0.598	4028	1734398	0.00322274	0.0137958	0	0.0196824	0	0.00275827	0.0235049	0	0	Bacteria	Chloroflexota	Anaerolineae	Anaerolineales	UBA11858	UBA11858		d__Bacteria;p__Chloroflexota;c__Anaerolineae;o__Anaerolineales;f__UBA11858;g__UBA11858;s__
Aegir_M39_B71	7	91.49	1.264	87.52	0.24	0.388	18648	3309667	0	0.00306974	0	0	0	0.00708332	0.60024	0.0141547	0	Bacteria	Pseudomonadota	Gammaproteobacteria	Methylococcales	Methylomonadaceae	QPIN01	QPIN01 sp021647585	d__Bacteria;p__Pseudomonadota;c__Gammaproteobacteria;o__Methylococcales;f__Methylomonadaceae;g__QPIN01;s__QPIN01 sp021647585
Aegir_M39_B72	3	79.56	1.612	75.57	1.48	0.35	6780	2705735	0.0226602	0	0	0.00932382	0	0	0.053245	0.00740406	0	Bacteria	Bacteroidota	Bacteroidia	Flavobacteriales	Salibacteraceae	UBA2108		d__Bacteria;p__Bacteroidota;c__Bacteroidia;o__Flavobacteriales;f__Salibacteraceae;g__UBA2108;s__
Aegir_M39_B73	8	66.37	0	81	0.36	0.664	6795	4851728	0.00365044	0.00668202	0	0.0538579	0	0	0.0272114	0	0	Bacteria	Myxococcota	UBA796	UBA796	GCA-2862545	JACKEQ01		d__Bacteria;p__Myxococcota;c__UBA796;o__UBA796;f__GCA-2862545;g__JACKEQ01;s__
Aegir_M39_B74	2	97.06	0	99.34	0	0.543	32344	1963255	0.00133101	0.0029944	0	0.00802157	0	0	0.203161	0.0159164	0	Bacteria	WOR-3	Hydrothermia					d__Bacteria;p__WOR-3;c__Hydrothermia;o__;f__;g__;s__
Aegir_M39_B75	6	93.7	2.155	91.88	0.13	0.457	35464	3573161	0	0	0	0	0.0503811	0.00204738	0.081904	0.00936244	0	Bacteria	Pseudomonadota	Gammaproteobacteria	Methylococcales				d__Bacteria;p__Pseudomonadota;c__Gammaproteobacteria;o__Methylococcales;f__;g__;s__
Aegir_M39_B76	2	95.05	0	94.85	3.29	0.441	12182	5343659	0.00123051	0.00046393	0	0	0.00381886	0	0.0776203	0.00263808	0	Bacteria	KSB1	UBA2214	UBA2214	Zgenome-0027	JAADGR01		d__Bacteria;p__KSB1;c__UBA2214;o__UBA2214;f__Zgenome-0027;g__JAADGR01;s__
Aegir_M39_B77	3	96.77	1.344	96.21	1.06	0.358	34867	3377020	0.00461473	0.0148192	0	0.00538605	0.00943229	0.0131983	0.140753	0	0	Bacteria	Bacteroidota	Bacteroidia	Bacteroidales	UBA1556	QNXT01		d__Bacteria;p__Bacteroidota;c__Bacteroidia;o__Bacteroidales;f__UBA1556;g__QNXT01;s__
Aegir_M39_B78	2	98.83	1.098	95.74	0.71	0.635	75655	4055615	0.0148384	0	0	0	0	0.0142584	0.273928	0	0	Bacteria	Krumholzibacteriota	Krumholzibacteria	LZORAL124-64-63	LZORAL124-64-63	JAGRNP01		d__Bacteria;p__Krumholzibacteriota;c__Krumholzibacteria;o__LZORAL124-64-63;f__LZORAL124-64-63;g__JAGRNP01;s__
Aegir_M39_B79	2	94.09	0.909	95.77	1.73	0.598	57933	3378543	0	0.0103323	0	0.0303147	0	0.00503757	0.0942215	0	0	Bacteria	Chloroflexota	Anaerolineae	JAFGEY01	JAFGEY01			d__Bacteria;p__Chloroflexota;c__Anaerolineae;o__JAFGEY01;f__JAFGEY01;g__;s__
Aegir_M39_B8	1	67.68	1.858	67.23	2.33	0.327	7806	1660041	0.0601532	0.0130343	0.0548372	0.515032	0.0972125	0.0463464	0.0891968	0	0	Bacteria	Campylobacterota	Campylobacteria	Campylobacterales	Sulfurospirillaceae	Sulfurospirillum_A		d__Bacteria;p__Campylobacterota;c__Campylobacteria;o__Campylobacterales;f__Sulfurospirillaceae;g__Sulfurospirillum_A;s__
Aegir_M39_B80	0	92.01	1.826	94.82	2.69	0.623	21169	2022949	0	0	0	0	0	0.00760402	0.0675989	0	0	Bacteria	Desulfobacterota_F	B13-G15	B13-G15	B13-G15	B13-G15		d__Bacteria;p__Desulfobacterota_F;c__B13-G15;o__B13-G15;f__B13-G15;g__B13-G15;s__
Aegir_M39_B81	2	93.11	2.935	94.62	2.78	0.572	27708	3012188	0	0.00165818	0	0.0110013	0	0.0186374	0.289906	0	0	Bacteria	Chloroflexota	Anaerolineae	SpSt-600	SpSt-600	HyVt-206		d__Bacteria;p__Chloroflexota;c__Anaerolineae;o__SpSt-600;f__SpSt-600;g__HyVt-206;s__
Aegir_M39_B82	5	66.12	1.388	65.52	0.78	0.442	4583	2427928	0.00423586	0	0	0.0365225	0.04487	0.00907507	0.0459906	0	0	Bacteria	Desulfobacterota	Desulfobulbia	Desulfobulbales	Desulfocapsaceae	Desulforhopalus		d__Bacteria;p__Desulfobacterota;c__Desulfobulbia;o__Desulfobulbales;f__Desulfocapsaceae;g__Desulforhopalus;s__
Aegir_M39_B83	1	59.92	2.027	64.11	0.81	0.584	3815	1900723	0.00376033	0.00448534	0	0.0198964	0.0245912	0.00192222	0.0538415	0.00188234	0	Bacteria	Verrucomicrobiota	Kiritimatiellia	Kiritimatiellales	Pontiellaceae	Pontiella		d__Bacteria;p__Verrucomicrobiota;c__Kiritimatiellia;o__Kiritimatiellales;f__Pontiellaceae;g__Pontiella;s__
Aegir_M39_B84	2	92.54	3.455	92.89	1.52	0.418	9161	2065264	0	0	0	0	0	0.158265	0.561983	0.0061002	0	Bacteria	Desulfobacterota	Desulfofervidia	Desulfofervidales	Desulfofervidaceae	Desulfofervidus		d__Bacteria;p__Desulfobacterota;c__Desulfofervidia;o__Desulfofervidales;f__Desulfofervidaceae;g__Desulfofervidus;s__
Aegir_M39_B85	0	66.82	0.934	84.45	0.4	0.33	25328	494966	0	0	0	0	0	0	0.0670889	0	0	Archaea	Nanoarchaeota	Nanoarchaeia	Pacearchaeales	GW2011-AR1	WJLC01		d__Archaea;p__Nanoarchaeota;c__Nanoarchaeia;o__Pacearchaeales;f__GW2011-AR1;g__WJLC01;s__
Aegir_M39_B86	0	93.4	0	97.45	1.04	0.445	80657	2219976	0	0	0	0	0	0	0.0898514	0	0	Bacteria	WOR-3	Hydrothermia	B15-G9	DRBW01			d__Bacteria;p__WOR-3;c__Hydrothermia;o__B15-G9;f__DRBW01;g__;s__
Aegir_M39_B87	0	67.34	0.917	86.61	0.3	0.379	7575	965918	0	0	0	0.00710064	0	0	0.0527387	0	0	Bacteria	Patescibacteria	ABY1	UBA10025	JAHIVO01			d__Bacteria;p__Patescibacteria;c__ABY1;o__UBA10025;f__JAHIVO01;g__;s__
Aegir_M39_B88	6	88.41	3.418	99.83	1.55	0.734	13961	2907722	0.00293263	0.395754	0	0.0154708	0	0	0.0372861	0	0	Bacteria	Acidobacteriota	Polarisedimenticolia	J045	J045			d__Bacteria;p__Acidobacteriota;c__Polarisedimenticolia;o__J045;f__J045;g__;s__
Aegir_M39_B89	1	87.73	2.439	98.34	2.12	0.425	53421	2415035	0	0.00486453	0	0.00169685	0	0.00324243	0.0796367	0	0	Bacteria	Acidobacteriota	Aminicenantia	S016-38	S016-38	S016-38		d__Bacteria;p__Acidobacteriota;c__Aminicenantia;o__S016-38;f__S016-38;g__S016-38;s__
Aegir_M39_B9	1	98.8	1.6	95.84	0.34	0.334	27800	1483363	0	0	0	0	0	0.0031665	0.292484	0	0	Archaea	Thermoplasmatota	E2	UBA202	JdFR-43			d__Archaea;p__Thermoplasmatota;c__E2;o__UBA202;f__JdFR-43;g__;s__
Aegir_M39_B90	1	77.74	2.903	73.9	2.54	0.393	6890	1234073	0.00163422	0.0871643	0.428064	0.00286545	0	0	0.140769	0	0	Bacteria	Campylobacterota	Campylobacteria	Campylobacterales	Nitratiruptoraceae			d__Bacteria;p__Campylobacterota;c__Campylobacteria;o__Campylobacterales;f__Nitratiruptoraceae;g__;s__
Aegir_M39_B91	0	98	0.8	96.54	0.11	0.433	25837	1462779	0	0.0014158	0	0.0101656	0	0.00982382	0.166183	0	0	Archaea	Thermoplasmatota	E2	UBA202	JdFR-43	JAGGZK01		d__Archaea;p__Thermoplasmatota;c__E2;o__UBA202;f__JdFR-43;g__JAGGZK01;s__
Aegir_M39_B92	6	84.68	4.946	90.06	3.98	0.602	9220	4345087	0	0	0	0	0	0	0.0567918	0.00116825	0	Bacteria	Desulfobacterota_F	DSWW01	DSWW01	DSWW01	S015-6		d__Bacteria;p__Desulfobacterota_F;c__DSWW01;o__DSWW01;f__DSWW01;g__S015-6;s__
Aegir_M39_B93	2	82.21	4.098	79.19	2.49	0.37	8673	1630447	0.275371	0.0442675	0.00913799	1.12732	0.158287	0.0328299	0.83559	0.00675444	0	Bacteria	Campylobacterota	Campylobacteria	Campylobacterales	Sulfurovaceae	Sulfurovum		d__Bacteria;p__Campylobacterota;c__Campylobacteria;o__Campylobacterales;f__Sulfurovaceae;g__Sulfurovum;s__
Aegir_M39_B94	2	98.79	0	98.61	0.57	0.4	22920	3216333	0.00571558	0.00279241	0	0.0563886	0	0.00269069	0.0588048	0	0	Bacteria	Spirochaetota	Spirochaetia	B11-G9	B11-G9	S145-15		d__Bacteria;p__Spirochaetota;c__Spirochaetia;o__B11-G9;f__B11-G9;g__S145-15;s__
Aegir_M39_B95	0	59.82	0	68.24	0.42	0.474	4640	845037	0	0	0	0	0	0	0.0593725	0	0	Archaea	Aenigmatarchaeota	Aenigmatarchaeia	QMZP01	QMZP01			d__Archaea;p__Aenigmatarchaeota;c__Aenigmatarchaeia;o__QMZP01;f__QMZP01;g__;s__
Aegir_M39_B96	1	97.95	0.819	99.99	0.13	0.296	26306	1505304	0	0.0345413	0.00854915	0.0226316	0	0.00344538	0.037108	0	0.00348456	Bacteria	Campylobacterota	Campylobacteria	Campylobacterales	Sulfurovaceae	JAADEQ01		d__Bacteria;p__Campylobacterota;c__Campylobacteria;o__Campylobacterales;f__Sulfurovaceae;g__JAADEQ01;s__
Aegir_M39_B97	0	70.93	3.013	69.59	0.32	0.353	5873	2443790	0.397853	0.000913569	0	0.877063	0.012118	0.00409033	0.107225	0.00472915	0	Bacteria	Bacteroidota	Bacteroidia	Cytophagales	Cyclobacteriaceae	JAKISE01		d__Bacteria;p__Bacteroidota;c__Bacteroidia;o__Cytophagales;f__Cyclobacteriaceae;g__JAKISE01;s__
Aegir_M39_B98	7	99.35	0	98.1	0.32	0.582	64298	3806658	0	0	0	0	0	0	0.114915	0	0	Bacteria	Desulfobacterota	Desulfobacteria	Desulfobacterales	JAFDDL01			d__Bacteria;p__Desulfobacterota;c__Desulfobacteria;o__Desulfobacterales;f__JAFDDL01;g__;s__
Aegir_M39_B99	7	95.89	0.645	90.63	0.06	0.523	34139	3267007	0.0090707	0.000856778	0	0.126407	0	0	0.0400293	0	0	Bacteria	Desulfobacterota	Desulfobacteria	Desulfobacterales	Desulfosarcinaceae			d__Bacteria;p__Desulfobacterota;c__Desulfobacteria;o__Desulfobacterales;f__Desulfosarcinaceae;g__;s__
Barite_M33_B1	1	59.05	5.376	64.6	1.04	0.515	3520	1085202	0	0	0	0	0	0	0	0.0357436	0	Bacteria	Omnitrophota	Koll11	Tantalellales	Tantalellaceae	DAOVKF01		d__Bacteria;p__Omnitrophota;c__Koll11;o__Tantalellales;f__Tantalellaceae;g__DAOVKF01;s__
Barite_M33_B10	2	75.92	4.228	66.32	2.66	0.49	5300	3555637	0	0	0	0	0	0	0	0.0407996	0	Bacteria	Pseudomonadota	Gammaproteobacteria	Pseudomonadales	Azotimanducaceae_A	JAHRVQ01		d__Bacteria;p__Pseudomonadota;c__Gammaproteobacteria;o__Pseudomonadales;f__Azotimanducaceae_A;g__JAHRVQ01;s__
Barite_M33_B100	6	94.5	2.747	97.92	2.99	0.369	9296	2559087	0.0113045	0	0	0	0	0	0.00448458	0.167556	0	Bacteria	Pseudomonadota	Alphaproteobacteria	Micavibrionales	UBA2020			d__Bacteria;p__Pseudomonadota;c__Alphaproteobacteria;o__Micavibrionales;f__UBA2020;g__;s__
Barite_M33_B101	2	91.41	2.002	89.04	1.49	0.287	17545	2968548	0.0093239	0.00190127	0	0	0.0387141	0.00767816	0.100413	0.168413	0	Bacteria	Bacteroidota	Bacteroidia	Flavobacteriales	Flavobacteriaceae	S010-17		d__Bacteria;p__Bacteroidota;c__Bacteroidia;o__Flavobacteriales;f__Flavobacteriaceae;g__S010-17;s__
Barite_M33_B102	4	95.69	2.688	90.49	1.85	0.598	32618	4973666	0	0	0	0	0	0	0	0.163402	0	Bacteria	Planctomycetota	UBA1135	UBA1135	GCA-002686595	NORP259		d__Bacteria;p__Planctomycetota;c__UBA1135;o__UBA1135;f__GCA-002686595;g__NORP259;s__
Barite_M33_B103	3	96.12	6.584	96.27	4.55	0.393	29718	3355696	0.00397905	0	0	0	0	0	0	0.262405	0	Bacteria	Pseudomonadota	Gammaproteobacteria	SZUA-229	SZUA-229	SZUA-229		d__Bacteria;p__Pseudomonadota;c__Gammaproteobacteria;o__SZUA-229;f__SZUA-229;g__SZUA-229;s__
Barite_M33_B104	5	97.81	3.075	98.83	3.86	0.407	45047	3253245	0	0	0	0	0	0	0	0.347508	0	Bacteria	Pseudomonadota	Gammaproteobacteria	Methylococcales	Methylomonadaceae	Methyloprofundus		d__Bacteria;p__Pseudomonadota;c__Gammaproteobacteria;o__Methylococcales;f__Methylomonadaceae;g__Methyloprofundus;s__
Barite_M33_B105	7	86.49	1.569	91.83	0.22	0.429	10096	2085314	0	0	0	0	0	0	0	0.0621047	0	Bacteria	Pseudomonadota	Gammaproteobacteria	Methylococcales	Methylomonadaceae			d__Bacteria;p__Pseudomonadota;c__Gammaproteobacteria;o__Methylococcales;f__Methylomonadaceae;g__;s__
Barite_M33_B106	4	93.77	0.724	95.86	0.22	0.375	112493	2567992	0.0115428	0	0	0	0	0.00423547	0	0.584172	0	Bacteria	Pseudomonadota	Gammaproteobacteria	QNFE01				d__Bacteria;p__Pseudomonadota;c__Gammaproteobacteria;o__QNFE01;f__;g__;s__
Barite_M33_B107	6	97.88	1.957	99.94	0.81	0.399	167338	2978243	0	0	0	0	0	0	0	0.249606	0	Bacteria	Pseudomonadota	Gammaproteobacteria	Nitrosococcales	Methylophagaceae	GCA-002733105		d__Bacteria;p__Pseudomonadota;c__Gammaproteobacteria;o__Nitrosococcales;f__Methylophagaceae;g__GCA-002733105;s__
Barite_M33_B108	4	90.96	2.054	86.44	2.94	0.547	13313	3357316	0	0.000438783	0	0	0	0	0	0.0837455	0	Bacteria	Verrucomicrobiota	Verrucomicrobiae	Opitutales	Opitutaceae	Cephaloticoccus		d__Bacteria;p__Verrucomicrobiota;c__Verrucomicrobiae;o__Opitutales;f__Opitutaceae;g__Cephaloticoccus;s__
Barite_M33_B109	1	90.59	1.732	90.35	3.32	0.359	9967	5549993	0	0	0	0	0	0	0	0.0651068	0	Bacteria	Bacteroidota	Bacteroidia	Chitinophagales	Saprospiraceae	BCD1		d__Bacteria;p__Bacteroidota;c__Bacteroidia;o__Chitinophagales;f__Saprospiraceae;g__BCD1;s__
Barite_M33_B11	0	57.96	0.681	62.42	0.64	0.481	3968	1298898	0	0	0	0	0	0	0.000989607	0.0339931	0	Bacteria	Desulfobacterota	Anaeroferrophillalia	Anaeroferrophillales	Anaeroferrophillaceae	DQWO01		d__Bacteria;p__Desulfobacterota;c__Anaeroferrophillalia;o__Anaeroferrophillales;f__Anaeroferrophillaceae;g__DQWO01;s__
Barite_M33_B110	5	56.97	8.87	60.04	6.16	0.592	3235	3306070	0	0	0	0	0	0.000993093	0	0.0392694	0	Bacteria	Myxococcota_A	UBA9160	UBA9160	UBA4427	UBA4427		d__Bacteria;p__Myxococcota_A;c__UBA9160;o__UBA9160;f__UBA4427;g__UBA4427;s__
Barite_M33_B111	2	83.19	3.278	74.14	2.75	0.379	13022	1491970	0.0860024	0.000730642	0	0	0	0.00804282	0	0.123619	0	Bacteria	Campylobacterota	Campylobacteria	Campylobacterales	Sulfurovaceae	Sulfurovum	Sulfurovum sp030949325	d__Bacteria;p__Campylobacterota;c__Campylobacteria;o__Campylobacterales;f__Sulfurovaceae;g__Sulfurovum;s__Sulfurovum sp030949325
Barite_M33_B112	4	63.79	4.31	82.35	8.62	0.394	5935	3968575	0.00465478	0	0	0	0	0	0	0.0481787	0	Bacteria	Bacteroidota	Bacteroidia	Cytophagales	Cyclobacteriaceae	Reichenbachiella		d__Bacteria;p__Bacteroidota;c__Bacteroidia;o__Cytophagales;f__Cyclobacteriaceae;g__Reichenbachiella;s__
Barite_M33_B113	3	92.03	0.783	94.53	0.54	0.407	22910	2501443	0.52843	0.000638355	0	0	0	0	0	0.072672	0	Bacteria	Pseudomonadota	Gammaproteobacteria	Beggiatoales	Beggiatoaceae			d__Bacteria;p__Pseudomonadota;c__Gammaproteobacteria;o__Beggiatoales;f__Beggiatoaceae;g__;s__
Barite_M33_B114	2	53.44	1.724	58.07	1	0.446	4837	1578663	0	0.00048791	0	0	0.00465826	0.00367681	0	0.0542796	0	Bacteria	Pseudomonadota	Gammaproteobacteria	SZUA-229	SZUA-229	GCA-2746365		d__Bacteria;p__Pseudomonadota;c__Gammaproteobacteria;o__SZUA-229;f__SZUA-229;g__GCA-2746365;s__
Barite_M33_B115	1	94.62	0.394	95.61	1.92	0.35	35288	4157252	0	0	0	0	0	0	0	0.0647056	0	Bacteria	Bacteroidota	Bacteroidia	Flavobacteriales	Salibacteraceae	CAJXZP01		d__Bacteria;p__Bacteroidota;c__Bacteroidia;o__Flavobacteriales;f__Salibacteraceae;g__CAJXZP01;s__
Barite_M33_B12	0	68.1	0	71.25	0.72	0.301	9022	2148808	0.010684	0.0023775	0	0	0.0237713	0.00608697	0.0043644	0.356906	0	Bacteria	Bacteroidota	Bacteroidia	Flavobacteriales	Flavobacteriaceae	MAAR01		d__Bacteria;p__Bacteroidota;c__Bacteroidia;o__Flavobacteriales;f__Flavobacteriaceae;g__MAAR01;s__
Barite_M33_B13	4	86.82	3.39	93.38	3.12	0.627	6508	3078105	0	0	0	0	0	0	0	0.043492	0	Bacteria	Pseudomonadota	Gammaproteobacteria	Chromatiales	Chromatiaceae	Thiosymbion		d__Bacteria;p__Pseudomonadota;c__Gammaproteobacteria;o__Chromatiales;f__Chromatiaceae;g__Thiosymbion;s__
Barite_M33_B14	2	77.45	1.024	71.38	1.83	0.351	22211	1686214	0.0172207	0	0	0	0	0	0	0.198905	0	Bacteria	Campylobacterota	Campylobacteria	Campylobacterales	Sulfurovaceae	Sulfurovum		d__Bacteria;p__Campylobacterota;c__Campylobacteria;o__Campylobacterales;f__Sulfurovaceae;g__Sulfurovum;s__
Barite_M33_B15	0	71.08	2.032	64.42	1.59	0.355	6385	1810339	0.0360732	0	0	0	0	0.0131612	0	0.12068	0	Bacteria	Campylobacterota	Campylobacteria	Campylobacterales	Sulfurimonadaceae	GCA-2733885		d__Bacteria;p__Campylobacterota;c__Campylobacteria;o__Campylobacterales;f__Sulfurimonadaceae;g__GCA-2733885;s__
Barite_M33_B16	0	78.34	1.136	82.22	2.09	0.579	5277	2916333	0	0	0	0	0	0	0	0.0499801	0	Bacteria	Planctomycetota	Phycisphaerae	Phycisphaerales	Phycisphaeraceae	JAHQVV01		d__Bacteria;p__Planctomycetota;c__Phycisphaerae;o__Phycisphaerales;f__Phycisphaeraceae;g__JAHQVV01;s__
Barite_M33_B17	2	67.92	2.427	68.3	0.75	0.552	4395	1970450	0.00213369	0.000444777	0	0	0	0	0	0.0482019	0	Bacteria	Planctomycetota	UBA1135	UBA1135	UBA1135	GCA-2746235		d__Bacteria;p__Planctomycetota;c__UBA1135;o__UBA1135;f__UBA1135;g__GCA-2746235;s__
Barite_M33_B18	2	84.65	1.159	92.73	2.48	0.451	78650	1867411	0	0	0	0	0	0	0	0.136404	0	Bacteria	Pseudomonadota	Alphaproteobacteria	Micavibrionales	Micavibrionaceae			d__Bacteria;p__Pseudomonadota;c__Alphaproteobacteria;o__Micavibrionales;f__Micavibrionaceae;g__;s__
Barite_M33_B19	0	79.82	5.036	83.28	5.73	0.534	7971	2483222	0	0	0	0	0	0	0	0.507896	0	Bacteria	Planctomycetota	Phycisphaerae	Phycisphaerales	UBA1924	UBA1924		d__Bacteria;p__Planctomycetota;c__Phycisphaerae;o__Phycisphaerales;f__UBA1924;g__UBA1924;s__
Barite_M33_B2	3	92.04	1.352	92.2	2.25	0.447	99702	3067222	0	0	0	0	0	0	0	0.0704084	0	Bacteria	Pseudomonadota	Alphaproteobacteria	Caulobacterales	Maricaulaceae	Robiginitomaculum_A		d__Bacteria;p__Pseudomonadota;c__Alphaproteobacteria;o__Caulobacterales;f__Maricaulaceae;g__Robiginitomaculum_A;s__
Barite_M33_B20	2	89.78	1.521	90.27	0.5	0.499	19468	3153495	0	0	0	0	0	0	0	2.84199	0	Bacteria	Pseudomonadota	Alphaproteobacteria	Sphingomonadales	Kordiimonadaceae	Kordiimonas		d__Bacteria;p__Pseudomonadota;c__Alphaproteobacteria;o__Sphingomonadales;f__Kordiimonadaceae;g__Kordiimonas;s__
Barite_M33_B21	9	96.07	2.277	96.51	1.1	0.404	38131	5045323	0	0	0	0	0	0	0	0.0655393	0	Bacteria	Bacteroidota	Bacteroidia	Cytophagales	Cyclobacteriaceae	Roseivirga		d__Bacteria;p__Bacteroidota;c__Bacteroidia;o__Cytophagales;f__Cyclobacteriaceae;g__Roseivirga;s__
Barite_M33_B22	1	58.53	1.519	60.23	2.24	0.398	3509	1758753	0	0.000474506	0	0	0.0339452	0	0	0.0246424	0	Bacteria	Pseudomonadota	Gammaproteobacteria	Thiotrichales	Thiotrichaceae	HyVt-477		d__Bacteria;p__Pseudomonadota;c__Gammaproteobacteria;o__Thiotrichales;f__Thiotrichaceae;g__HyVt-477;s__
Barite_M33_B23	8	91.95	1.091	95.44	0.3	0.367	23571	3554409	0.0308491	0	0	0	0	0.0173042	0	1.55568	0	Bacteria	Pseudomonadota	Gammaproteobacteria	Methylococcales	Methylomonadaceae	WTBX01		d__Bacteria;p__Pseudomonadota;c__Gammaproteobacteria;o__Methylococcales;f__Methylomonadaceae;g__WTBX01;s__
Barite_M33_B24	1	69.98	1.748	72.68	0.83	0.508	4604	1212732	0	0	0	0	0	0	0	0.0604631	0	Bacteria	Pseudomonadota	Alphaproteobacteria	Rickettsiales				d__Bacteria;p__Pseudomonadota;c__Alphaproteobacteria;o__Rickettsiales;f__;g__;s__
Barite_M33_B25	0	52.03	0.366	61.71	0.5	0.469	3675	1233890	0.00433353	0	0	0	0	0	0.00177099	0.0333187	0	Bacteria	Pseudomonadota	Alphaproteobacteria	Rickettsiales	SXRF01			d__Bacteria;p__Pseudomonadota;c__Alphaproteobacteria;o__Rickettsiales;f__SXRF01;g__;s__
Barite_M33_B26	2	58.25	1.159	54.04	2.04	0.433	3050	1355371	0	0	0	0	0	0	0	0.0398823	0	Bacteria	Pseudomonadota	Alphaproteobacteria	Rhizobiales	OSC116	OCS116		d__Bacteria;p__Pseudomonadota;c__Alphaproteobacteria;o__Rhizobiales;f__OSC116;g__OCS116;s__
Barite_M33_B27	1	52.09	7.326	61.79	5.7	0.407	2740	1174751	0	0	0	0	0	0	0	0.0414214	0	Bacteria	Pseudomonadota	Alphaproteobacteria	Micavibrionales	UBA2020			d__Bacteria;p__Pseudomonadota;c__Alphaproteobacteria;o__Micavibrionales;f__UBA2020;g__;s__
Barite_M33_B28	7	73.46	1.7	76.67	0.23	0.494	6385	3697313	0.00316238	0	0	0	0	0	0	0.0799257	0	Bacteria	Verrucomicrobiota	Verrucomicrobiae	Verrucomicrobiales	DEV007	Arctic95D-9		d__Bacteria;p__Verrucomicrobiota;c__Verrucomicrobiae;o__Verrucomicrobiales;f__DEV007;g__Arctic95D-9;s__
Barite_M33_B29	7	72.41	0	87.63	2.06	0.424	10558	2421448	0.00267072	0	0	0	0	0.00235832	0	0.0964178	0	Bacteria	Pseudomonadota	Gammaproteobacteria	SZUA-229	SZUA-229	GCA-2746365		d__Bacteria;p__Pseudomonadota;c__Gammaproteobacteria;o__SZUA-229;f__SZUA-229;g__GCA-2746365;s__
Barite_M33_B3	1	59.02	1.241	58.09	0.18	0.528	4769	1487399	0	0.000693019	0	0	0	0.00259316	0	0.119237	0	Bacteria	Pseudomonadota	Alphaproteobacteria	Caulobacterales	Maricaulaceae	Robiginitomaculum_B		d__Bacteria;p__Pseudomonadota;c__Alphaproteobacteria;o__Caulobacterales;f__Maricaulaceae;g__Robiginitomaculum_B;s__
Barite_M33_B30	3	83.86	2.298	80.28	1.86	0.323	57099	2738554	0.0934479	0.00217846	0	0	0.0166906	0.0150036	0	3.78132	0	Bacteria	Bacteroidota	Bacteroidia	Flavobacteriales	Flavobacteriaceae	Urechidicola		d__Bacteria;p__Bacteroidota;c__Bacteroidia;o__Flavobacteriales;f__Flavobacteriaceae;g__Urechidicola;s__
Barite_M33_B31	5	77.72	6.126	77.21	3.57	0.372	6955	3311757	0.0720331	0	0	0	0	0	0	0.0940982	0	Bacteria	Pseudomonadota	Gammaproteobacteria	Enterobacterales	Kangiellaceae	GCA-002733465		d__Bacteria;p__Pseudomonadota;c__Gammaproteobacteria;o__Enterobacterales;f__Kangiellaceae;g__GCA-002733465;s__
Barite_M33_B32	4	95.22	6.501	99.62	5.69	0.363	55685	3278078	0.0167774	0	0	0	0	0	0	1.94631	0	Bacteria	Pseudomonadota	Gammaproteobacteria	GCA-001735895	GCA-001735895			d__Bacteria;p__Pseudomonadota;c__Gammaproteobacteria;o__GCA-001735895;f__GCA-001735895;g__;s__
Barite_M33_B33	2	57.83	0	65.9	0.91	0.468	5126	1900511	0	0	0	0	0	0	0	0.0416584	0	Bacteria	Pseudomonadota	Alphaproteobacteria	Caulobacterales	Maricaulaceae	Robiginitomaculum_A		d__Bacteria;p__Pseudomonadota;c__Alphaproteobacteria;o__Caulobacterales;f__Maricaulaceae;g__Robiginitomaculum_A;s__
Barite_M33_B34	6	52.57	3.773	58.1	3.11	0.418	5166	1810426	0	0.00369063	0	0	0.0144914	0	0.00878268	0.414776	0	Bacteria	Pseudomonadota	Gammaproteobacteria	Methylococcales	Methylomonadaceae	Methyloprofundus		d__Bacteria;p__Pseudomonadota;c__Gammaproteobacteria;o__Methylococcales;f__Methylomonadaceae;g__Methyloprofundus;s__
Barite_M33_B35	5	82.05	8.721	79.97	9.07	0.41	7578	3806793	0.00904727	0.00331614	0	0	0.01466	0.00377918	0.00829296	0.0936023	0	Bacteria	Pseudomonadota	Gammaproteobacteria	Methylococcales	Methylomonadaceae	Methyloprofundus		d__Bacteria;p__Pseudomonadota;c__Gammaproteobacteria;o__Methylococcales;f__Methylomonadaceae;g__Methyloprofundus;s__
Barite_M33_B36	5	83.55	2.08	82.53	0.55	0.515	10513	2432449	0.0150705	0.000715329	0	0	0	0	0	0.338197	0	Bacteria	Pseudomonadota	Alphaproteobacteria	Rhodobacterales	Rhodobacteraceae	UBA3077		d__Bacteria;p__Pseudomonadota;c__Alphaproteobacteria;o__Rhodobacterales;f__Rhodobacteraceae;g__UBA3077;s__
Barite_M33_B37	4	94.4	4.619	86.94	2.81	0.511	37042	3736813	0	0	0	0	0	0	0	0.0761887	0	Bacteria	Pseudomonadota	Gammaproteobacteria	Pseudomonadales	Halieaceae	Halioglobus		d__Bacteria;p__Pseudomonadota;c__Gammaproteobacteria;o__Pseudomonadales;f__Halieaceae;g__Halioglobus;s__
Barite_M33_B38	2	95.54	3.071	91.58	1.71	0.397	19660	3524766	0.0270096	0.00193451	0	0	0	0.00412483	0.00278244	1.11756	0	Bacteria	Pseudomonadota	Gammaproteobacteria	Enterobacterales	Kangiellaceae	GCA-002733465		d__Bacteria;p__Pseudomonadota;c__Gammaproteobacteria;o__Enterobacterales;f__Kangiellaceae;g__GCA-002733465;s__
Barite_M33_B39	0	69.64	2.623	76.67	1.08	0.504	4416	2181381	0.0443089	0.00119611	0	0	0.00189743	0.00542681	0.00121425	0.0473818	0.00126212	Bacteria	Pseudomonadota	Alphaproteobacteria	Rhizobiales	JAJFHR01	JAJFHR01		d__Bacteria;p__Pseudomonadota;c__Alphaproteobacteria;o__Rhizobiales;f__JAJFHR01;g__JAJFHR01;s__
Barite_M33_B4	4	94.81	0.609	92.43	0.08	0.489	24916	2260991	0	0.000388487	0	0	0	0	0	0.0803046	0	Bacteria	Pseudomonadota	Gammaproteobacteria	Arenicellales	Poriferihabitantaceae	JAAELZ01		d__Bacteria;p__Pseudomonadota;c__Gammaproteobacteria;o__Arenicellales;f__Poriferihabitantaceae;g__JAAELZ01;s__
Barite_M33_B40	2	55.69	1.149	60.01	1.81	0.558	4924	2860824	0.0148369	0	0	0	0.00278346	0	0	0.0418516	0	Bacteria	Planctomycetota	Planctomycetia	Pirellulales	Lacipirellulaceae	Botrimarina		d__Bacteria;p__Planctomycetota;c__Planctomycetia;o__Pirellulales;f__Lacipirellulaceae;g__Botrimarina;s__
Barite_M33_B41	2	53.95	1.136	47.97	1.17	0.535	8684	1807993	0.00483257	0.000878471	0	0	0.0137689	0.00139158	0	0.214049	0	Bacteria	Planctomycetota	Phycisphaerae	Phycisphaerales	UBA1924	UBA1924		d__Bacteria;p__Planctomycetota;c__Phycisphaerae;o__Phycisphaerales;f__UBA1924;g__UBA1924;s__
Barite_M33_B42	1	61.22	1.014	65.75	0.13	0.468	125046	1249673	0	0	0	0	0	0	0	0.132866	0	Bacteria	Pseudomonadota	Alphaproteobacteria	Micavibrionales	Micavibrionaceae	JAJRYK01		d__Bacteria;p__Pseudomonadota;c__Alphaproteobacteria;o__Micavibrionales;f__Micavibrionaceae;g__JAJRYK01;s__
Barite_M33_B43	6	93.4	5.585	98.13	3.01	0.501	18911	3728935	0	0	0	0	0	0	0	0.0684658	0	Bacteria	Verrucomicrobiota	Verrucomicrobiae	Verrucomicrobiales	Akkermansiaceae	Oceaniferula		d__Bacteria;p__Verrucomicrobiota;c__Verrucomicrobiae;o__Verrucomicrobiales;f__Akkermansiaceae;g__Oceaniferula;s__
Barite_M33_B44	2	89.87	0.869	94.73	0.05	0.492	183189	1978311	0	0	0	0	0	0	0	0.101383	0	Bacteria	Pseudomonadota	Alphaproteobacteria	Micavibrionales	Micavibrionaceae	UBA5701		d__Bacteria;p__Pseudomonadota;c__Alphaproteobacteria;o__Micavibrionales;f__Micavibrionaceae;g__UBA5701;s__
Barite_M33_B45	4	84.7	3.735	96.13	2.73	0.377	18222	2424432	0.0119402	0	0	0	0	0.00392218	0	0.287963	0	Bacteria	Pseudomonadota	Gammaproteobacteria	GCA-001735895	GCA-001735895			d__Bacteria;p__Pseudomonadota;c__Gammaproteobacteria;o__GCA-001735895;f__GCA-001735895;g__;s__
Barite_M33_B46	2	94.14	3.532	95.75	3.78	0.366	22072	4019186	0.0071892	0.00107879	0	0	0.00482835	0.00367555	0	0.601461	0	Bacteria	Pseudomonadota	Gammaproteobacteria	Xanthomonadales	Marinicellaceae	NORP309		d__Bacteria;p__Pseudomonadota;c__Gammaproteobacteria;o__Xanthomonadales;f__Marinicellaceae;g__NORP309;s__
Barite_M33_B47	6	82.55	3.114	85.16	1.85	0.423	16163	2556221	0.0143616	0.00166727	0.000997092	0	0	0.00586285	0	0.281988	0	Bacteria	Pseudomonadota	Gammaproteobacteria	SZUA-229	SZUA-229	GCA-2746365		d__Bacteria;p__Pseudomonadota;c__Gammaproteobacteria;o__SZUA-229;f__SZUA-229;g__GCA-2746365;s__
Barite_M33_B48	3	88.61	1.219	100	0.91	0.476	14668	2514489	0	0.00720953	0	0	0	0	0	0.443328	0	Bacteria	Pseudomonadota	Gammaproteobacteria	Xanthomonadales	SZUA-36	SZUA-51		d__Bacteria;p__Pseudomonadota;c__Gammaproteobacteria;o__Xanthomonadales;f__SZUA-36;g__SZUA-51;s__
Barite_M33_B49	3	88.85	5.216	100	1.15	0.476	14512	4096245	0	0	0	0	0	0	0	0.0693245	0	Bacteria	Pseudomonadota	Gammaproteobacteria	Pseudomonadales	Azotimanducaceae_A	GCA-002726655		d__Bacteria;p__Pseudomonadota;c__Gammaproteobacteria;o__Pseudomonadales;f__Azotimanducaceae_A;g__GCA-002726655;s__
Barite_M33_B5	7	52.22	0.959	64.85	5.92	0.479	6507	2163791	0	0	0	0	0.0443252	0	0	0.0513551	0	Bacteria	Nitrospirota	Nitrospiria	Nitrospirales	UBA8639	UBA8639		d__Bacteria;p__Nitrospirota;c__Nitrospiria;o__Nitrospirales;f__UBA8639;g__UBA8639;s__
Barite_M33_B50	2	58.62	0	80.54	0.26	0.43	16986	3178742	0.00311375	0	0	0	0	0.00142598	0	0.158829	0	Bacteria	Pseudomonadota	Gammaproteobacteria	Pseudomonadales	Azotimanducaceae_A	JAHRVQ01		d__Bacteria;p__Pseudomonadota;c__Gammaproteobacteria;o__Pseudomonadales;f__Azotimanducaceae_A;g__JAHRVQ01;s__
Barite_M33_B51	4	67.54	4.75	75	8.74	0.462	8704	1658548	0	0	0	0	0	0.00203884	0	0.0553824	0	Bacteria	Desulfobacterota	Dissulfuribacteria	Dissulfuribacterales	UBA3076	UBA3076		d__Bacteria;p__Desulfobacterota;c__Dissulfuribacteria;o__Dissulfuribacterales;f__UBA3076;g__UBA3076;s__
Barite_M33_B52	5	64.93	4.444	60.15	2.59	0.488	3331	4314982	0.00406002	0	0	0	0	0	0	0.0446749	0	Bacteria	Planctomycetota	Planctomycetia	Planctomycetales	Planctomycetaceae	Thalassoglobus		d__Bacteria;p__Planctomycetota;c__Planctomycetia;o__Planctomycetales;f__Planctomycetaceae;g__Thalassoglobus;s__
Barite_M33_B53	2	75.45	1.612	72.48	1.59	0.368	5093	2274440	0	0.000836932	0	0	0	0	0	0.040483	0	Bacteria	Bacteroidota	Bacteroidia	Flavobacteriales	Schleiferiaceae	JAOARK01		d__Bacteria;p__Bacteroidota;c__Bacteroidia;o__Flavobacteriales;f__Schleiferiaceae;g__JAOARK01;s__
Barite_M33_B54	0	84.85	4.508	86.24	4.36	0.362	11712	1774416	0.137866	0.00807431	0	0.0301756	0.048662	0.00524994	0	0.581899	0	Bacteria	Campylobacterota	Campylobacteria	Campylobacterales	Sulfurovaceae	Sulfurovum		d__Bacteria;p__Campylobacterota;c__Campylobacteria;o__Campylobacterales;f__Sulfurovaceae;g__Sulfurovum;s__
Barite_M33_B55	3	57.5	0.892	68.24	0.66	0.404	3900	1834332	0	0	0	0	0	0	0	0.0346156	0	Bacteria	Bdellovibrionota	Bdellovibrionia	Bdellovibrionales	JAGQZY01	JAGQZY01		d__Bacteria;p__Bdellovibrionota;c__Bdellovibrionia;o__Bdellovibrionales;f__JAGQZY01;g__JAGQZY01;s__
Barite_M33_B56	3	89.06	1.599	84	1.09	0.328	23884	3045631	0	0.0017008	0	0	0	0	0	0.165618	0	Bacteria	Bacteroidota	Bacteroidia	Flavobacteriales	Flavobacteriaceae	Lutimonas		d__Bacteria;p__Bacteroidota;c__Bacteroidia;o__Flavobacteriales;f__Flavobacteriaceae;g__Lutimonas;s__
Barite_M33_B57	3	67.24	0	78.46	0.26	0.381	13574	2713758	0	0	0	0	0	0	0	0.0568374	0	Bacteria	Pseudomonadota	Gammaproteobacteria	Xanthomonadales	Marinicellaceae	NORP309		d__Bacteria;p__Pseudomonadota;c__Gammaproteobacteria;o__Xanthomonadales;f__Marinicellaceae;g__NORP309;s__
Barite_M33_B58	11	81.79	3.387	71.7	3.29	0.545	24933	6001196	0	0	0	0	0	0	0	0.0690488	0	Bacteria	Myxococcota	Bradymonadia	UBA4248				d__Bacteria;p__Myxococcota;c__Bradymonadia;o__UBA4248;f__;g__;s__
Barite_M33_B59	0	64.91	8.771	61.9	6.04	0.378	7823	958028	0.00926259	0	0	0	0	0	0	0.0391239	0	Bacteria	Pseudomonadota	Alphaproteobacteria	Rickettsiales	Rickettsiaceae	GCA-2402195		d__Bacteria;p__Pseudomonadota;c__Alphaproteobacteria;o__Rickettsiales;f__Rickettsiaceae;g__GCA-2402195;s__
Barite_M33_B6	9	95.8	7.325	96.73	4.65	0.383	25838	3567414	0.00880679	0	0	0	0.0153965	0	0	1.84988	0	Bacteria	Pseudomonadota	Gammaproteobacteria	Methylococcales	Methylomonadaceae	QPIN01		d__Bacteria;p__Pseudomonadota;c__Gammaproteobacteria;o__Methylococcales;f__Methylomonadaceae;g__QPIN01;s__
Barite_M33_B60	1	59.16	2.442	57.32	2	0.632	3311	2229164	0	0	0	0	0.00542728	0	0	0.0517502	0	Bacteria	Planctomycetota	Phycisphaerae	Phycisphaerales	Phycisphaeraceae	Algisphaera		d__Bacteria;p__Planctomycetota;c__Phycisphaerae;o__Phycisphaerales;f__Phycisphaeraceae;g__Algisphaera;s__
Barite_M33_B61	5	93.44	2.049	85.91	1.76	0.349	33855	1923370	0.0182463	0.00330578	0	0	0.0642377	0.00518937	0.0118843	1.35949	0	Bacteria	Campylobacterota	Campylobacteria	Campylobacterales	Sulfurovaceae	Sulfurovum		d__Bacteria;p__Campylobacterota;c__Campylobacteria;o__Campylobacterales;f__Sulfurovaceae;g__Sulfurovum;s__
Barite_M33_B62	2	96.19	0	90.6	0	0.49	78408	2484311	0.00415194	0	0	0	0.00884112	0.00162062	0.00192641	0.886848	0	Bacteria	Pseudomonadota	Alphaproteobacteria	Sphingomonadales	Emcibacteraceae	Paremcibacter		d__Bacteria;p__Pseudomonadota;c__Alphaproteobacteria;o__Sphingomonadales;f__Emcibacteraceae;g__Paremcibacter;s__
Barite_M33_B63	1	96.24	2.681	98.09	1	0.488	56315	2705520	0	0	0	0	0.0025509	0.0111012	0	0.112066	0	Bacteria	Pseudomonadota	Alphaproteobacteria	Caulobacterales	Maricaulaceae	Robiginitomaculum_A		d__Bacteria;p__Pseudomonadota;c__Alphaproteobacteria;o__Caulobacterales;f__Maricaulaceae;g__Robiginitomaculum_A;s__
Barite_M33_B64	4	86.65	3.336	83.91	4.58	0.513	5023	4229644	0	0	0	0	0	0	0	0.0456168	0	Bacteria	Verrucomicrobiota	Verrucomicrobiae	Opitutales	Opitutaceae	Pelagisphaera		d__Bacteria;p__Verrucomicrobiota;c__Verrucomicrobiae;o__Opitutales;f__Opitutaceae;g__Pelagisphaera;s__
Barite_M33_B65	1	74.66	2.221	72.58	1.21	0.419	5390	1470320	0	0	0	0	0	0.00723507	0	0.0766752	0	Bacteria	Pseudomonadota	Gammaproteobacteria	Burkholderiales	Nitrosomonadaceae	Nitrosomonas		d__Bacteria;p__Pseudomonadota;c__Gammaproteobacteria;o__Burkholderiales;f__Nitrosomonadaceae;g__Nitrosomonas;s__
Barite_M33_B66	3	78.94	1.282	80.41	0.71	0.485	10299	3390790	0	0	0	0	0	0	0	0.0509736	0	Bacteria	Hydrogenedentota	Hydrogenedentia	Hydrogenedentiales	GCA-2746185	DTSJ01		d__Bacteria;p__Hydrogenedentota;c__Hydrogenedentia;o__Hydrogenedentiales;f__GCA-2746185;g__DTSJ01;s__
Barite_M33_B67	2	95.23	3.361	95.14	1.15	0.371	51469	1779988	0	0	0	0	0	0	0	0.0832586	0	Bacteria	Pseudomonadota	Alphaproteobacteria	UBA1280	UBA2136			d__Bacteria;p__Pseudomonadota;c__Alphaproteobacteria;o__UBA1280;f__UBA2136;g__;s__
Barite_M33_B68	1	83.43	2.653	81.17	3.54	0.311	12708	1964901	0.0290929	0	0	0	0	0.0424475	0	0.203701	0	Bacteria	Campylobacterota	Campylobacteria	Campylobacterales	Sulfurimonadaceae	Sulfurimonas		d__Bacteria;p__Campylobacterota;c__Campylobacteria;o__Campylobacterales;f__Sulfurimonadaceae;g__Sulfurimonas;s__
Barite_M33_B69	12	82.75	1.724	100	0.52	0.455	19302	4656738	0	0	0	0	0	0	0	0.72085	0	Bacteria	Pseudomonadota	Gammaproteobacteria	Arenicellales	Arenicellaceae	Arenicella	Arenicella sp016763815	d__Bacteria;p__Pseudomonadota;c__Gammaproteobacteria;o__Arenicellales;f__Arenicellaceae;g__Arenicella;s__Arenicella sp016763815
Barite_M33_B7	3	78.04	0.863	72.97	0.33	0.436	10809	1749095	0	0.000642378	0	0	0.00339025	0	0	0.184135	0	Bacteria	Pseudomonadota	Gammaproteobacteria	Burkholderiales	Nitrosomonadaceae	Nitrosomonas		d__Bacteria;p__Pseudomonadota;c__Gammaproteobacteria;o__Burkholderiales;f__Nitrosomonadaceae;g__Nitrosomonas;s__
Barite_M33_B70	3	94.08	1.38	93.9	0.46	0.537	27997	3318942	0	0	0	0	0.00879341	0.00175822	0	0.176396	0	Bacteria	Verrucomicrobiota	Kiritimatiellia	Kiritimatiellales	Pontiellaceae	Pontiella		d__Bacteria;p__Verrucomicrobiota;c__Kiritimatiellia;o__Kiritimatiellales;f__Pontiellaceae;g__Pontiella;s__
Barite_M33_B71	2	70.68	1.724	88.79	2.36	0.354	12885	4056854	0	0	0	0	0	0	0	0.148203	0	Bacteria	Pseudomonadota	Gammaproteobacteria	Xanthomonadales	Marinicellaceae	NORP309		d__Bacteria;p__Pseudomonadota;c__Gammaproteobacteria;o__Xanthomonadales;f__Marinicellaceae;g__NORP309;s__
Barite_M33_B72	3	74.51	0.956	83.01	1.47	0.422	8221	2398603	0	0	0	0	0	0	0	0.225872	0	Bacteria	Pseudomonadota	Alphaproteobacteria	Sphingomonadales	SMXR01	CAKZLM01		d__Bacteria;p__Pseudomonadota;c__Alphaproteobacteria;o__Sphingomonadales;f__SMXR01;g__CAKZLM01;s__
Barite_M33_B73	2	98.63	0	98.91	0.3	0.392	67877	3219646	0	0	0	0	0	0	0	0.0991487	0	Bacteria	Pseudomonadota	Alphaproteobacteria	Rhizobiales	OSC116	OCS116		d__Bacteria;p__Pseudomonadota;c__Alphaproteobacteria;o__Rhizobiales;f__OSC116;g__OCS116;s__
Barite_M33_B74	3	96.17	2.144	98.67	0.15	0.499	23702	7141915	0	0	0	0	0	0	0	0.0800618	0	Bacteria	Bacteroidota	Bacteroidia	J057	JADKCL01			d__Bacteria;p__Bacteroidota;c__Bacteroidia;o__J057;f__JADKCL01;g__;s__
Barite_M33_B75	2	82.62	1.086	85.7	0.71	0.445	13741	1602589	0	0	0	0	0	0	0	0.0828938	0	Bacteria	Pseudomonadota	Alphaproteobacteria	Micavibrionales	Micavibrionaceae			d__Bacteria;p__Pseudomonadota;c__Alphaproteobacteria;o__Micavibrionales;f__Micavibrionaceae;g__;s__
Barite_M33_B76	1	69.82	0	76.48	3	0.492	6891	2377350	0	0	0	0	0	0	0	0.055166	0	Bacteria	Verrucomicrobiota	Kiritimatiellia	SS1-B-03-39				d__Bacteria;p__Verrucomicrobiota;c__Kiritimatiellia;o__SS1-B-03-39;f__;g__;s__
Barite_M33_B77	2	67.17	0.029	71.98	0.62	0.464	7173	1891623	0	0	0	0	0	0	0	0.193523	0	Bacteria	Pseudomonadota	Alphaproteobacteria	Caulobacterales	Maricaulaceae	Robiginitomaculum_A		d__Bacteria;p__Pseudomonadota;c__Alphaproteobacteria;o__Caulobacterales;f__Maricaulaceae;g__Robiginitomaculum_A;s__
Barite_M33_B78	4	85.26	0	87.54	0.43	0.431	11985	1369743	0.0166122	0	0	0	0	0	0	0.0476253	0	Bacteria	Pseudomonadota	Alphaproteobacteria	Caedimonadales	UBA9215	UBA9215		d__Bacteria;p__Pseudomonadota;c__Alphaproteobacteria;o__Caedimonadales;f__UBA9215;g__UBA9215;s__
Barite_M33_B79	3	96.37	2.678	99.55	0.66	0.38	56804	2873474	0	0	0	0	0	0	0	0.420684	0	Bacteria	Bdellovibrionota	Bdellovibrionia	Bdellovibrionales	JAMLIO01	JALZUR01		d__Bacteria;p__Bdellovibrionota;c__Bdellovibrionia;o__Bdellovibrionales;f__JAMLIO01;g__JALZUR01;s__
Barite_M33_B8	2	79.18	3.057	81.66	3.12	0.378	11743	1442976	0	0	0	0	0	0	0	0.112098	0	Bacteria	Pseudomonadota	Alphaproteobacteria	Micavibrionales	Micavibrionaceae	UBA1850		d__Bacteria;p__Pseudomonadota;c__Alphaproteobacteria;o__Micavibrionales;f__Micavibrionaceae;g__UBA1850;s__
Barite_M33_B80	0	81.5	1.704	70.43	3.68	0.527	32459	2665953	0	0	0	0	0.00463521	0	0	0.297137	0	Bacteria	Planctomycetota	Phycisphaerae	Phycisphaerales	UBA1924	UBA1924		d__Bacteria;p__Planctomycetota;c__Phycisphaerae;o__Phycisphaerales;f__UBA1924;g__UBA1924;s__
Barite_M33_B81	0	61.68	2.97	88.88	3.04	0.415	11436	881413	0.00611344	0.00101665	0	0	0.00161911	0	0	0.0519148	0	Bacteria	Patescibacteria	Paceibacteria	UBA9973	UBA918	OLB19		d__Bacteria;p__Patescibacteria;c__Paceibacteria;o__UBA9973;f__UBA918;g__OLB19;s__
Barite_M33_B82	4	89.85	0.268	83.7	0.71	0.41	8434	2912039	0.00139612	0.00122529	0	0	0	0	0	0.0630858	0	Bacteria	Bacteroidota	Bacteroidia	Flavobacteriales	Cryomorphaceae	Cryomorpha		d__Bacteria;p__Bacteroidota;c__Bacteroidia;o__Flavobacteriales;f__Cryomorphaceae;g__Cryomorpha;s__
Barite_M33_B83	2	87.25	1.307	94.29	0.04	0.432	10405	1759371	0	0	0	0	0	0	0	0.352289	0	Archaea	Halobacteriota	Syntropharchaeia	Alkanophagales	Methanospirareceae	QMVO01	QMVO01 sp025464645	d__Archaea;p__Halobacteriota;c__Syntropharchaeia;o__Alkanophagales;f__Methanospirareceae;g__QMVO01;s__QMVO01 sp025464645
Barite_M33_B84	2	53.21	1.173	50.51	0.51	0.425	6308	1179352	0.00312109	0.0022898	0	0	0.00455319	0.00262583	0	0.466363	0	Bacteria	Pseudomonadota	Gammaproteobacteria	SZUA-229	SZUA-229	GCA-2746365		d__Bacteria;p__Pseudomonadota;c__Gammaproteobacteria;o__SZUA-229;f__SZUA-229;g__GCA-2746365;s__
Barite_M33_B85	2	54.31	9.482	59.33	9.94	0.487	5509	2740724	0	0.00049939	0	0	0	0	0	0.0709083	0	Bacteria	Pseudomonadota	Gammaproteobacteria	Pseudomonadales	Pseudohongiellaceae	UBA9145		d__Bacteria;p__Pseudomonadota;c__Gammaproteobacteria;o__Pseudomonadales;f__Pseudohongiellaceae;g__UBA9145;s__
Barite_M33_B86	1	84.67	1.594	100	1.08	0.365	162508	1557274	0.00178451	0	0	0	0	0	0	0.129872	0	Bacteria	Pseudomonadota	Alphaproteobacteria	Micavibrionales	Micavibrionaceae	UBA1664		d__Bacteria;p__Pseudomonadota;c__Alphaproteobacteria;o__Micavibrionales;f__Micavibrionaceae;g__UBA1664;s__
Barite_M33_B87	4	92.27	4.196	88.49	0.68	0.494	18715	3414343	0	0.000511963	0	0	0	0	0	0.0940551	0	Bacteria	Pseudomonadota	Gammaproteobacteria	Xanthomonadales	SZUA-36	SZUA-36		d__Bacteria;p__Pseudomonadota;c__Gammaproteobacteria;o__Xanthomonadales;f__SZUA-36;g__SZUA-36;s__
Barite_M33_B88	5	91.01	1.309	84.44	1.45	0.524	23295	3036918	0.00839422	0	0	0	0	0	0	0.127649	0	Bacteria	Pseudomonadota	Alphaproteobacteria	Rhodobacterales	Rhodobacteraceae	Amylibacter		d__Bacteria;p__Pseudomonadota;c__Alphaproteobacteria;o__Rhodobacterales;f__Rhodobacteraceae;g__Amylibacter;s__
Barite_M33_B89	107	89.84	2.08	95.63	2.83	0.417	9299	6696518	0.027692	0	0	0	0	0	0	0.0690477	0	Bacteria	Pseudomonadota	Gammaproteobacteria	Enterobacterales	Alteromonadaceae	JABSOG01		d__Bacteria;p__Pseudomonadota;c__Gammaproteobacteria;o__Enterobacterales;f__Alteromonadaceae;g__JABSOG01;s__
Barite_M33_B9	4	61.08	1.488	73.31	2.68	0.502	5540	1133727	0	0	0	0	0	0.00737282	0	0.0427249	0	Bacteria	Desulfobacterota	Dissulfuribacteria	Dissulfuribacterales	UBA3076	UBA3076		d__Bacteria;p__Desulfobacterota;c__Dissulfuribacteria;o__Dissulfuribacterales;f__UBA3076;g__UBA3076;s__
Barite_M33_B90	1	81.07	1.984	74.41	1.03	0.344	14827	3513975	0	0	0	0	0	0	0	0.0783931	0	Bacteria	Bacteroidota	Bacteroidia	Cytophagales	Cyclobacteriaceae			d__Bacteria;p__Bacteroidota;c__Bacteroidia;o__Cytophagales;f__Cyclobacteriaceae;g__;s__
Barite_M33_B91	1	97.05	0.653	91.21	1.01	0.483	22726	1935962	0	0	0	0	0	0	0	0.132995	0	Archaea	Halobacteriota	Methanosarcinia	Methanosarcinales	Methanogasteraceae	Methanogaster		d__Archaea;p__Halobacteriota;c__Methanosarcinia;o__Methanosarcinales;f__Methanogasteraceae;g__Methanogaster;s__
Barite_M33_B92	5	79.06	1.436	67.3	1.12	0.397	8111	2623620	0	0	0	0	0	0	0	0.0547271	0	Bacteria	Pseudomonadota	Gammaproteobacteria	Methylococcales	Methylomonadaceae	Methyloprofundus		d__Bacteria;p__Pseudomonadota;c__Gammaproteobacteria;o__Methylococcales;f__Methylomonadaceae;g__Methyloprofundus;s__
Barite_M33_B93	0	74.87	5.37	77.42	6.11	0.488	10557	2928563	0	0	0	0	0	0	0	0.120722	0	Bacteria	Pseudomonadota	Gammaproteobacteria	Pseudomonadales	Pseudohongiellaceae	UBA9145		d__Bacteria;p__Pseudomonadota;c__Gammaproteobacteria;o__Pseudomonadales;f__Pseudohongiellaceae;g__UBA9145;s__
Barite_M33_B94	1	86.52	2.459	88.76	2.39	0.476	12543	2684193	0.00166612	0	0	0	0.00331825	0	0	0.0684616	0	Bacteria	Pseudomonadota	Alphaproteobacteria	Caulobacterales	Maricaulaceae	Robiginitomaculum_A		d__Bacteria;p__Pseudomonadota;c__Alphaproteobacteria;o__Caulobacterales;f__Maricaulaceae;g__Robiginitomaculum_A;s__
Barite_M33_B95	2	71.6	1.971	73.34	2.1	0.386	8177	1447201	0	0	0	0	0	0	0	0.0558458	0	Bacteria	Pseudomonadota	Alphaproteobacteria	Micavibrionales	Micavibrionaceae	UBA1850		d__Bacteria;p__Pseudomonadota;c__Alphaproteobacteria;o__Micavibrionales;f__Micavibrionaceae;g__UBA1850;s__
Barite_M33_B96	1	85.08	0.379	82.29	2.06	0.414	6714	1238885	0	0	0	0	0	0	0	0.0414319	0	Bacteria	Pseudomonadota	Alphaproteobacteria	UBA1280	UBA2136			d__Bacteria;p__Pseudomonadota;c__Alphaproteobacteria;o__UBA1280;f__UBA2136;g__;s__
Barite_M33_B97	16	82.56	3.048	84.52	1.26	0.364	10221	3139079	0.00198783	0	0	0	0	0	0	3.54482	0	Bacteria	Pseudomonadota	Gammaproteobacteria	Xanthomonadales	Marinicellaceae	NORP309		d__Bacteria;p__Pseudomonadota;c__Gammaproteobacteria;o__Xanthomonadales;f__Marinicellaceae;g__NORP309;s__
Barite_M33_B98	1	68.57	3.448	62.41	0.42	0.488	5099	1898227	0.00515745	0	0	0	0	0	0.00257988	0.043255	0	Bacteria	Pseudomonadota	Alphaproteobacteria	Rhizobiales	Devosiaceae	DROE01		d__Bacteria;p__Pseudomonadota;c__Alphaproteobacteria;o__Rhizobiales;f__Devosiaceae;g__DROE01;s__
Barite_M33_B99	7	76.72	1.422	80.2	0.87	0.469	14206	2145207	0	0	0	0	0	0	0	0.0487037	0	Bacteria	Pseudomonadota	Gammaproteobacteria	Chromatiales	Sedimenticolaceae			d__Bacteria;p__Pseudomonadota;c__Gammaproteobacteria;o__Chromatiales;f__Sedimenticolaceae;g__;s__
SevenSisters_M42_B1	1	87.3	1.2	78.48	1.66	0.65	108224	2211810	0	0	0.00189545	0	0	0	0	0	1.24297	Bacteria	Pseudomonadota	Alphaproteobacteria	Rhodobacterales	Rhodobacteraceae	WFPA01		d__Bacteria;p__Pseudomonadota;c__Alphaproteobacteria;o__Rhodobacterales;f__Rhodobacteraceae;g__WFPA01;s__
SevenSisters_M42_B10	5	98.88	0	96.6	0.41	0.593	48244	4669513	0.00140238	0	0	0	0	0	0	0	0.0840411	Bacteria	Planctomycetota	Planctomycetia	Planctomycetales	Planctomycetaceae			d__Bacteria;p__Planctomycetota;c__Planctomycetia;o__Planctomycetales;f__Planctomycetaceae;g__;s__
SevenSisters_M42_B100	2	82.39	0	95.99	0.07	0.371	49466	1560265	0	0	0	0	0	0	0	0	0.29719	Bacteria	WOR-3	Hydrothermia	LBFQ01	DSFT01			d__Bacteria;p__WOR-3;c__Hydrothermia;o__LBFQ01;f__DSFT01;g__;s__
SevenSisters_M42_B101	1	67.92	0.594	62.54	4.34	0.316	4285	1641432	0	0	0	0	0	0	0	0	0.026083	Bacteria	Bdellovibrionota	UBA2361	JANWWW01				d__Bacteria;p__Bdellovibrionota;c__UBA2361;o__JANWWW01;f__;g__;s__
SevenSisters_M42_B102	2	90.04	2.195	93.51	2.6	0.301	15914	1783300	0	0.171394	0	0	0	0	0	0	5.00618	Bacteria	Aquificota	Aquificae	Hydrogenothermales	Hydrogenothermaceae			d__Bacteria;p__Aquificota;c__Aquificae;o__Hydrogenothermales;f__Hydrogenothermaceae;g__;s__
SevenSisters_M42_B103	1	98.46	2.2	99.64	2.03	0.709	32260	2491655	0	0.00176315	0.00431173	0	0	0	0	0	0.580767	Bacteria	Pseudomonadota	Alphaproteobacteria	Rhodobacterales	Rhodobacteraceae	WFPA01		d__Bacteria;p__Pseudomonadota;c__Alphaproteobacteria;o__Rhodobacterales;f__Rhodobacteraceae;g__WFPA01;s__
SevenSisters_M42_B104	0	68.05	0.925	99.33	0.19	0.497	25822	832709	0	0	0	0	0	0	0	0	0.0510422	Bacteria	Patescibacteria	Paceibacteria	Moranbacterales	GCA-2747515			d__Bacteria;p__Patescibacteria;c__Paceibacteria;o__Moranbacterales;f__GCA-2747515;g__;s__
SevenSisters_M42_B105	1	71.27	0.793	70.18	0.15	0.565	5765	1948587	0	0	0	0	0	0	0	0	0.0293113	Bacteria	Pseudomonadota	Gammaproteobacteria	Pseudomonadales	Oleiphilaceae	J085		d__Bacteria;p__Pseudomonadota;c__Gammaproteobacteria;o__Pseudomonadales;f__Oleiphilaceae;g__J085;s__
SevenSisters_M42_B106	2	87.06	1.243	88.42	1.25	0.724	11482	2158188	0	0.00189555	0	0	0	0	0	0	1.53177	Bacteria	Pseudomonadota	Alphaproteobacteria	Geminicoccales	Geminicoccaceae	HRBIN39		d__Bacteria;p__Pseudomonadota;c__Alphaproteobacteria;o__Geminicoccales;f__Geminicoccaceae;g__HRBIN39;s__
SevenSisters_M42_B107	3	100	2.991	96.54	1.14	0.684	41577	3569906	0.00571901	0.00136812	0	0	0	0	0.00190105	0	0.0500516	Bacteria	Actinomycetota	Acidimicrobiia	Acidimicrobiales	TK06	DRKF01		d__Bacteria;p__Actinomycetota;c__Acidimicrobiia;o__Acidimicrobiales;f__TK06;g__DRKF01;s__
SevenSisters_M42_B108	0	69.36	5.106	71.15	1.32	0.694	4344	1479595	0	0.00238306	0.00784935	0	0	0	0	0	3.00698	Bacteria	Deinococcota	Deinococci	Deinococcales	Marinithermaceae	WFXV01		d__Bacteria;p__Deinococcota;c__Deinococci;o__Deinococcales;f__Marinithermaceae;g__WFXV01;s__
SevenSisters_M42_B109	3	93.1	3.552	90.92	3.38	0.644	8954	4211323	0	0	0	0	0	0	0	0	0.0380681	Bacteria	Planctomycetota	Planctomycetia	Pirellulales	S012-138	S012-138		d__Bacteria;p__Planctomycetota;c__Planctomycetia;o__Pirellulales;f__S012-138;g__S012-138;s__
SevenSisters_M42_B11	2	68.1	1.724	74.01	3.04	0.687	5263	2021664	0	0	0	0	0	0	0	0	0.040285	Bacteria	Pseudomonadota	Gammaproteobacteria	UBA6429	UBA6429			d__Bacteria;p__Pseudomonadota;c__Gammaproteobacteria;o__UBA6429;f__UBA6429;g__;s__
SevenSisters_M42_B110	0	89.71	1.401	95.35	0.08	0.467	90068	1433056	0	0	0	0	0	0	0	0	0.166879	Archaea	Nanoarchaeota	Nanoarchaeia	Woesearchaeales	J091	J091		d__Archaea;p__Nanoarchaeota;c__Nanoarchaeia;o__Woesearchaeales;f__J091;g__J091;s__
SevenSisters_M42_B111	2	86.22	2.017	80.63	0.56	0.494	6635	2335216	0	0	0	0.00344164	0	0	0	0	0.0320489	Bacteria	Desulfobacterota	Desulfovibrionia	Desulfovibrionales	Desulfohalobiaceae			d__Bacteria;p__Desulfobacterota;c__Desulfovibrionia;o__Desulfovibrionales;f__Desulfohalobiaceae;g__;s__
SevenSisters_M42_B112	0	85.28	0	87.15	1.39	0.453	25864	712928	0	0	0	0	0	0	0	0	0.143565	Archaea	Micrarchaeota	Micrarchaeia	Anstonellales	J096	J096		d__Archaea;p__Micrarchaeota;c__Micrarchaeia;o__Anstonellales;f__J096;g__J096;s__
SevenSisters_M42_B113	1	98.9	1.098	99.98	1.31	0.537	26753	3678150	0	0	0	0	0	0	0	0	0.0581782	Bacteria	Calditrichota	Calditrichia	RBG-13-44-9	J042	J042		d__Bacteria;p__Calditrichota;c__Calditrichia;o__RBG-13-44-9;f__J042;g__J042;s__
SevenSisters_M42_B114	0	82.71	0	90.46	0.35	0.428	52886	758989	0	0	0	0	0	0	0	0	0.113377	Archaea	Micrarchaeota	Micrarchaeia	Anstonellales	J096	J096		d__Archaea;p__Micrarchaeota;c__Micrarchaeia;o__Anstonellales;f__J096;g__J096;s__
SevenSisters_M42_B115	4	58.62	5.172	65.37	4.25	0.649	19580	1651056	0	0.0206009	0.00233103	0	0	0	0.00308383	0	0.0981903	Bacteria	Pseudomonadota	Alphaproteobacteria	Rhodobacterales	Rhodobacteraceae	JAAEUB01		d__Bacteria;p__Pseudomonadota;c__Alphaproteobacteria;o__Rhodobacterales;f__Rhodobacteraceae;g__JAAEUB01;s__
SevenSisters_M42_B116	0	83.64	0.934	93.61	0.11	0.343	91371	688347	0	0	0	0	0	0	0	0	0.0564806	Archaea	Micrarchaeota	Micrarchaeia	Anstonellales	J096			d__Archaea;p__Micrarchaeota;c__Micrarchaeia;o__Anstonellales;f__J096;g__;s__
SevenSisters_M42_B117	2	96.77	2.15	98.23	1.73	0.349	31678	2452337	0	0	0.000759952	0	0	0	0	0	0.670395	Bacteria	Bacteroidota	Bacteroidia	JACPRZ01	JACPRZ01			d__Bacteria;p__Bacteroidota;c__Bacteroidia;o__JACPRZ01;f__JACPRZ01;g__;s__
SevenSisters_M42_B118	3	93.7	2.097	87.24	0	0.349	52663	1903462	0	0	0	0	0	0	0	0	0.106553	Bacteria	Bacillota_A	Clostridia	Acetivibrionales_A				d__Bacteria;p__Bacillota_A;c__Clostridia;o__Acetivibrionales_A;f__;g__;s__
SevenSisters_M42_B119	0	98.27	1.724	91.69	0.21	0.625	22372	1929414	0	0	0	0	0	0	0	0	0.0483088	Bacteria	4484-113	4484-113					d__Bacteria;p__4484-113;c__4484-113;o__;f__;g__;s__
SevenSisters_M42_B12	2	54.57	2.276	64.53	2.36	0.453	6206	1459869	0	0.0127685	0.775816	0	0	0	0.00595454	0	0.0554389	Bacteria	Pseudomonadota	Gammaproteobacteria	Thiomicrospirales	Thiomicrospiraceae			d__Bacteria;p__Pseudomonadota;c__Gammaproteobacteria;o__Thiomicrospirales;f__Thiomicrospiraceae;g__;s__
SevenSisters_M42_B120	0	83.1	0.311	85.86	0.13	0.307	14553	858556	0	0	0	0	0	0	0	0	0.431007	Archaea	Micrarchaeota	Micrarchaeia	Anstonellales	J096	WAKO01		d__Archaea;p__Micrarchaeota;c__Micrarchaeia;o__Anstonellales;f__J096;g__WAKO01;s__
SevenSisters_M42_B121	3	99.45	0.546	97.82	0	0.487	405007	2949404	0	0	0	0	0	0	0	0	0.0766736	Bacteria	Bacteroidota	Bacteroidia	Cytophagales	Thermonemataceae	Thermonema	Thermonema rossianum	d__Bacteria;p__Bacteroidota;c__Bacteroidia;o__Cytophagales;f__Thermonemataceae;g__Thermonema;s__Thermonema rossianum
SevenSisters_M42_B122	5	98.75	0	95.36	0.86	0.547	48020	5707944	0	0	0	0	0	0	0	0	0.0666193	Bacteria	Planctomycetota	Planctomycetia	Pirellulales	Pirellulaceae			d__Bacteria;p__Planctomycetota;c__Planctomycetia;o__Pirellulales;f__Pirellulaceae;g__;s__
SevenSisters_M42_B123	0	64.35	0	91.64	0.04	0.435	43206	801585	0	0	0	0	0	0	0	0	0.0729674	Bacteria	Patescibacteria	Microgenomatia	JAADGY01	JAADGY01	JAJRVN01		d__Bacteria;p__Patescibacteria;c__Microgenomatia;o__JAADGY01;f__JAADGY01;g__JAJRVN01;s__
SevenSisters_M42_B124	3	94.53	0	95.56	0.01	0.357	36910	2385647	0	0	0	0	0	0	0	0	0.14213	Bacteria	Bacteroidota	Bacteroidia	SpSt-205	S141-50			d__Bacteria;p__Bacteroidota;c__Bacteroidia;o__SpSt-205;f__S141-50;g__;s__
SevenSisters_M42_B125	0	98.91	0	99.88	0.07	0.296	48182	2784146	0.0066588	0.00469798	0.00228323	0	0	0	0	0	0.122548	Bacteria	Bacteroidota	Bacteroidia	Flavobacteriales	Crocinitomicaceae	Putridiphycobacter		d__Bacteria;p__Bacteroidota;c__Bacteroidia;o__Flavobacteriales;f__Crocinitomicaceae;g__Putridiphycobacter;s__
SevenSisters_M42_B126	1	70.68	0	64.93	3.33	0.72	5248	4519650	0	0.0449249	0	0	0	0	0.00310493	0	0.0395226	Bacteria	Myxococcota	UBA796	UBA796	UBA2385	J125		d__Bacteria;p__Myxococcota;c__UBA796;o__UBA796;f__UBA2385;g__J125;s__
SevenSisters_M42_B127	3	94.32	1.886	96.38	1.16	0.615	11126	2531815	0	0.260982	0.00195808	0	0	0	0.00580296	0	4.74345	Bacteria	Pseudomonadota	Gammaproteobacteria	Methylococcales	Methylothermaceae	Methylohalobius		d__Bacteria;p__Pseudomonadota;c__Gammaproteobacteria;o__Methylococcales;f__Methylothermaceae;g__Methylohalobius;s__
SevenSisters_M42_B128	0	58.51	2.214	93.42	3.81	0.459	9883	754527	0	0	0	0	0	0	0	0	0.0346518	Bacteria	Patescibacteria	Paceibacteria	UBA9983_A	J119	UBA12088		d__Bacteria;p__Patescibacteria;c__Paceibacteria;o__UBA9983_A;f__J119;g__UBA12088;s__
SevenSisters_M42_B129	3	94.35	0.543	96.17	0	0.507	101000	2193314	0	0	0	0	0	0	0	0	0.672399	Bacteria	Pseudomonadota	Gammaproteobacteria	Xanthomonadales	Marinicellaceae	S144-45		d__Bacteria;p__Pseudomonadota;c__Gammaproteobacteria;o__Xanthomonadales;f__Marinicellaceae;g__S144-45;s__
SevenSisters_M42_B13	4	61.4	0	70.88	0.42	0.74	4890	2597261	0	0	0	0	0	0	0	0	0.0688859	Bacteria	Myxococcota	UBA796	UBA796				d__Bacteria;p__Myxococcota;c__UBA796;o__UBA796;f__;g__;s__
SevenSisters_M42_B130	2	98.29	3.846	98.6	1.53	0.692	36557	3093478	0	0.000405572	0	0	0	0	0	0	0.090623	Bacteria	Actinomycetota	Acidimicrobiia	UBA5794	ZC4RG35	S012-128		d__Bacteria;p__Actinomycetota;c__Acidimicrobiia;o__UBA5794;f__ZC4RG35;g__S012-128;s__
SevenSisters_M42_B131	1	97.13	1.024	96.8	0.05	0.471	28041	1792187	0	0	0	0	0	0	0	0	0.209459	Bacteria	Campylobacterota	Campylobacteria	Campylobacterales	Sulfurovaceae	Sulfurovum		d__Bacteria;p__Campylobacterota;c__Campylobacteria;o__Campylobacterales;f__Sulfurovaceae;g__Sulfurovum;s__
SevenSisters_M42_B132	0	71.65	0	87.76	0.4	0.367	63711	849837	0	0	0	0	0	0	0	0	0.131658	Archaea	Nanoarchaeota	Nanoarchaeia	Pacearchaeales	GW2011-AR1	JAGVXH01		d__Archaea;p__Nanoarchaeota;c__Nanoarchaeia;o__Pacearchaeales;f__GW2011-AR1;g__JAGVXH01;s__
SevenSisters_M42_B133	2	90.46	0.081	85.63	0.01	0.289	23234	1204330	0	0	0	0	0	0	0	0	0.870544	Bacteria	Aquificota	Aquificae	Hydrogenothermales	Hydrogenothermaceae			d__Bacteria;p__Aquificota;c__Aquificae;o__Hydrogenothermales;f__Hydrogenothermaceae;g__;s__
SevenSisters_M42_B134	0	91.94	1.576	90.75	1.44	0.685	31045	2203597	0	0	0	0	0	0	0	0	0.272672	Bacteria	Pseudomonadota	Alphaproteobacteria	Rhodobacterales	Rhodobacteraceae	WFPA01		d__Bacteria;p__Pseudomonadota;c__Alphaproteobacteria;o__Rhodobacterales;f__Rhodobacteraceae;g__WFPA01;s__
SevenSisters_M42_B135	8	92.58	1.29	95.86	0.47	0.707	15290	4000792	0	0	0	0	0	0	0	0	0.0935813	Bacteria	Myxococcota	Polyangia	Nannocystales	Nannocystaceae	J032		d__Bacteria;p__Myxococcota;c__Polyangia;o__Nannocystales;f__Nannocystaceae;g__J032;s__
SevenSisters_M42_B136	6	95.39	2.727	97.37	2.41	0.597	31631	3160248	0	0	0	0	0	0	0	0	0.0778631	Bacteria	Nitrospirota	Nitrospiria	Nitrospirales	UBA8639	J017		d__Bacteria;p__Nitrospirota;c__Nitrospiria;o__Nitrospirales;f__UBA8639;g__J017;s__
SevenSisters_M42_B137	6	89.26	4.017	92.5	1.79	0.684	26463	3756095	0	0	0	0	0	0	0	0	0.0619223	Bacteria	CSSED10-310	JACPHN01	JACPHN01				d__Bacteria;p__CSSED10-310;c__JACPHN01;o__JACPHN01;f__;g__;s__
SevenSisters_M42_B138	0	56.63	1.284	67.02	1.96	0.502	3611	1590082	0	0.0153003	0.0375956	0	0	0	0.00755753	0	0.0312209	Archaea	Methanobacteriota_B	Thermococci	Thermococcales	Thermococcaceae	Thermococcus		d__Archaea;p__Methanobacteriota_B;c__Thermococci;o__Thermococcales;f__Thermococcaceae;g__Thermococcus;s__
SevenSisters_M42_B139	0	82.18	2.068	99.88	0.45	0.582	22960	879392	0	0	0	0	0	0	0	0	0.0458536	Bacteria	Patescibacteria	Paceibacteria	UBA9983_A	J119	WFWH01		d__Bacteria;p__Patescibacteria;c__Paceibacteria;o__UBA9983_A;f__J119;g__WFWH01;s__
SevenSisters_M42_B14	2	97.27	3.818	99.18	1.54	0.64	57816	3325109	0.00134747	0.00267469	0	0.00183329	0	0	0	0	0.173879	Bacteria	Chloroflexota	Anaerolineae	Ardenticatenales	Ardenticatenaceae	WFWG01		d__Bacteria;p__Chloroflexota;c__Anaerolineae;o__Ardenticatenales;f__Ardenticatenaceae;g__WFWG01;s__
SevenSisters_M42_B140	4	96.59	0	96.42	0.48	0.603	98524	4680146	0	0	0	0	0	0	0	0	0.0664173	Bacteria	Planctomycetota	Planctomycetia	Gemmatales				d__Bacteria;p__Planctomycetota;c__Planctomycetia;o__Gemmatales;f__;g__;s__
SevenSisters_M42_B141	0	63.46	0	57.24	0.56	0.67	4139	1047165	0	0	0	0	0	0	0	0	0.0299454	Bacteria	Bipolaricaulota	Bipolaricaulia	RBG-16-55-9	RBG-16-55-9	S012-72		d__Bacteria;p__Bipolaricaulota;c__Bipolaricaulia;o__RBG-16-55-9;f__RBG-16-55-9;g__S012-72;s__
SevenSisters_M42_B142	1	71.8	2.247	94.58	0.32	0.325	29192	832215	0	0	0	0	0	0	0	0	0.0513726	Bacteria	Patescibacteria	Dojkabacteria	B142	JAFGMG01			d__Bacteria;p__Patescibacteria;c__Dojkabacteria;o__B142;f__JAFGMG01;g__;s__
SevenSisters_M42_B143	0	59.78	0	69.92	2.52	0.336	5525	539775	0	0	0	0	0	0	0	0	0.0294405	Bacteria	Patescibacteria	ABY1	CAIXNZ01	JADLGS01			d__Bacteria;p__Patescibacteria;c__ABY1;o__CAIXNZ01;f__JADLGS01;g__;s__
SevenSisters_M42_B144	1	91.14	0.434	92.92	0.24	0.651	12827	2622670	0	0.00435421	0	0	0	0	0	0	0.610899	Bacteria	Pseudomonadota	Alphaproteobacteria	Sphingomonadales	Rhodothalassiaceae	J084		d__Bacteria;p__Pseudomonadota;c__Alphaproteobacteria;o__Sphingomonadales;f__Rhodothalassiaceae;g__J084;s__
SevenSisters_M42_B145	0	90.62	2.573	97.19	1.2	0.31	15363	1949557	0	0.00396691	0.0157488	0	0	0	0.00209287	0	0.0389639	Bacteria	Bacteroidota	Bacteroidia	Flavobacteriales	JAADED01			d__Bacteria;p__Bacteroidota;c__Bacteroidia;o__Flavobacteriales;f__JAADED01;g__;s__
SevenSisters_M42_B146	0	89.6	1.075	94.42	0.13	0.581	286333	1892729	0	0	0	0	0	0	0	0	0.0736386	Bacteria	Omnitrophota	Koll11	Zapsychrales	JANLHA01	JAKLFA01		d__Bacteria;p__Omnitrophota;c__Koll11;o__Zapsychrales;f__JANLHA01;g__JAKLFA01;s__
SevenSisters_M42_B147	4	94.83	0.955	82.28	0.16	0.68	17216	2932362	0	0	0	0	0	0	0	0	0.151604	Bacteria	Pseudomonadota	Alphaproteobacteria	Rhodobacterales	Rhodobacteraceae	Roseovarius		d__Bacteria;p__Pseudomonadota;c__Alphaproteobacteria;o__Rhodobacterales;f__Rhodobacteraceae;g__Roseovarius;s__
SevenSisters_M42_B148	1	71.2	1.415	67.92	3.36	0.536	5038	1556696	0.0126973	0.00142299	0	0	0	0	0	0	0.456952	Bacteria	Pseudomonadota	Gammaproteobacteria	SZUA-229	SZUA-229	S139-92		d__Bacteria;p__Pseudomonadota;c__Gammaproteobacteria;o__SZUA-229;f__SZUA-229;g__S139-92;s__
SevenSisters_M42_B149	1	95.58	0.919	98.49	0.24	0.646	84016	2406273	0.0040435	0	0	0	0	0	0	0	0.117381	Bacteria	Pseudomonadota	Gammaproteobacteria	SZUA-140	SZUA-140	S012-109		d__Bacteria;p__Pseudomonadota;c__Gammaproteobacteria;o__SZUA-140;f__SZUA-140;g__S012-109;s__
SevenSisters_M42_B15	2	99	2.722	100	0.03	0.513	192942	3774969	0	0	0	0	0	0	0	0	2.47357	Bacteria	Bacteroidota	Bacteroidia	Chitinophagales	Saprospiraceae	WFYJ01		d__Bacteria;p__Bacteroidota;c__Bacteroidia;o__Chitinophagales;f__Saprospiraceae;g__WFYJ01;s__
SevenSisters_M42_B150	3	94.21	1.091	91.88	0.13	0.367	12802	2160335	0	0	0	0	0	0	0	0	0.0388184	Bacteria	Desulfobacterota	Desulfovibrionia	Desulfovibrionales	Desulfohalobiaceae	Desulfothermus		d__Bacteria;p__Desulfobacterota;c__Desulfovibrionia;o__Desulfovibrionales;f__Desulfohalobiaceae;g__Desulfothermus;s__
SevenSisters_M42_B151	2	87.21	2.201	89.28	1.08	0.711	9118	3002128	0	0	0	0	0	0	0	0	0.0756208	Bacteria	Pseudomonadota	Alphaproteobacteria	Geminicoccales	Geminicoccaceae	HRBIN40		d__Bacteria;p__Pseudomonadota;c__Alphaproteobacteria;o__Geminicoccales;f__Geminicoccaceae;g__HRBIN40;s__
SevenSisters_M42_B152	0	91.8	1.366	94.58	1.48	0.336	14906	1858006	0	0	0	0	0	0	0	0	2.17266	Bacteria	Bacteroidota	Bacteroidia	SpSt-205	JAADEI01			d__Bacteria;p__Bacteroidota;c__Bacteroidia;o__SpSt-205;f__JAADEI01;g__;s__
SevenSisters_M42_B153	0	84.57	0	94.77	0	0.475	40883	771150	0	0	0	0	0	0	0	0	0.235799	Archaea	Aenigmatarchaeota	Aenigmatarchaeia	GW2011-AR5				d__Archaea;p__Aenigmatarchaeota;c__Aenigmatarchaeia;o__GW2011-AR5;f__;g__;s__
SevenSisters_M42_B154	2	93.03	2.295	100	2.8	0.374	11153	1929088	0.0190558	0.00460008	0	0.0348852	0.0209286	0.00339115	0.0233017	0.00817791	0.0433995	Bacteria	Campylobacterota	Campylobacteria	Campylobacterales	Sulfurovaceae	Sulfurovum		d__Bacteria;p__Campylobacterota;c__Campylobacteria;o__Campylobacterales;f__Sulfurovaceae;g__Sulfurovum;s__
SevenSisters_M42_B155	1	93.63	3.737	98.14	1.21	0.655	24764	4465484	0	0	0	0	0	0	0	0	0.0504865	Bacteria	Chloroflexota	Anaerolineae	Caldilineales	Caldilineaceae	S144-5		d__Bacteria;p__Chloroflexota;c__Anaerolineae;o__Caldilineales;f__Caldilineaceae;g__S144-5;s__
SevenSisters_M42_B156	0	76.86	1.123	96.18	0.03	0.292	70432	757244	0	0	0	0	0	0	0	0	0.154656	Bacteria	Patescibacteria	WWE3	2-01-FULL-39-13	JAACPI01			d__Bacteria;p__Patescibacteria;c__WWE3;o__2-01-FULL-39-13;f__JAACPI01;g__;s__
SevenSisters_M42_B157	0	77.1	0	94.4	0.02	0.529	23738	804090	0	0.0039809	0.0062697	0	0	0	0	0	0.623152	Archaea	Nanoarchaeota	Nanoarchaeia	Woesearchaeales	WAPJ01	WAPJ01		d__Archaea;p__Nanoarchaeota;c__Nanoarchaeia;o__Woesearchaeales;f__WAPJ01;g__WAPJ01;s__
SevenSisters_M42_B158	7	93.41	0	93.33	0.1	0.582	35851	2437000	0	0.0283861	0	0	0	0	0	0	1.16185	Bacteria	Pseudomonadota	Gammaproteobacteria	Methylococcales	Methylothermaceae	Methylohalobius		d__Bacteria;p__Pseudomonadota;c__Gammaproteobacteria;o__Methylococcales;f__Methylothermaceae;g__Methylohalobius;s__
SevenSisters_M42_B159	0	75.99	0	98.48	0	0.564	74100	619060	0	0	0	0	0	0	0	0	0.0732631	Bacteria	Patescibacteria	Paceibacteria	UBA9983_A	J119			d__Bacteria;p__Patescibacteria;c__Paceibacteria;o__UBA9983_A;f__J119;g__;s__
SevenSisters_M42_B16	2	97.05	0	100	0.46	0.611	39358	1637906	0	0	0	0	0	0	0	0	0.0541564	Bacteria	Pseudomonadota	Zetaproteobacteria	Mariprofundales	S012-25			d__Bacteria;p__Pseudomonadota;c__Zetaproteobacteria;o__Mariprofundales;f__S012-25;g__;s__
SevenSisters_M42_B17	0	65.74	0	94.67	0.06	0.432	167248	763712	0	0	0	0	0	0	0	0	0.0843609	Bacteria	Patescibacteria	Andersenbacteria	UBA10190	UBA10190			d__Bacteria;p__Patescibacteria;c__Andersenbacteria;o__UBA10190;f__UBA10190;g__;s__
SevenSisters_M42_B18	1	93.52	1.176	85.47	2.71	0.505	10700	3104033	0	0.00827693	0	0	0	0	0	0	0.0415103	Bacteria	Spirochaetota	Leptospirae	Leptospirales	Leptonemataceae	JAGRNA01		d__Bacteria;p__Spirochaetota;c__Leptospirae;o__Leptospirales;f__Leptonemataceae;g__JAGRNA01;s__
SevenSisters_M42_B19	0	58.62	0	78.25	0.07	0.396	16183	567220	0	0	0	0	0	0	0	0	0.0458205	Bacteria	Patescibacteria	Dojkabacteria	GCA-002793355	GCA-002793355			d__Bacteria;p__Patescibacteria;c__Dojkabacteria;o__GCA-002793355;f__GCA-002793355;g__;s__
SevenSisters_M42_B2	1	91.81	4.727	92.88	6.64	0.552	14851	5820264	0.00324935	0.0127801	0	0	0	0	0.0373465	0	0.056874	Bacteria	Chloroflexota	Anaerolineae	Promineofilales	Promineofilaceae	JAJRTP01		d__Bacteria;p__Chloroflexota;c__Anaerolineae;o__Promineofilales;f__Promineofilaceae;g__JAJRTP01;s__
SevenSisters_M42_B20	0	77.72	0	83.06	0.56	0.292	22569	639219	0	0	0	0	0	0	0	0	0.10206	Archaea	Iainarchaeota	Iainarchaeia	0-14-0-20-30-16	0-14-0-20-30-16			d__Archaea;p__Iainarchaeota;c__Iainarchaeia;o__0-14-0-20-30-16;f__0-14-0-20-30-16;g__;s__
SevenSisters_M42_B21	1	96.55	0	100	0.14	0.465	74905	2787784	0	0	0	0	0	0	0	0	0.58352	Bacteria	Bacteroidota	Bacteroidia	Chitinophagales	S012-47	S012-47		d__Bacteria;p__Bacteroidota;c__Bacteroidia;o__Chitinophagales;f__S012-47;g__S012-47;s__
SevenSisters_M42_B22	3	81.25	2.84	75.95	0.09	0.717	6999	3940623	0	0.00670964	0	0	0	0	0	0	0.094279	Bacteria	Planctomycetota	UBA1135	UBA2386	UBA2386			d__Bacteria;p__Planctomycetota;c__UBA1135;o__UBA2386;f__UBA2386;g__;s__
SevenSisters_M42_B23	2	97.87	2.123	99.09	0.63	0.546	45869	3144146	0.0110266	0.00568874	0	0	0	0	0.00272919	0	0.570573	Bacteria	Pseudomonadota	Gammaproteobacteria	UWMA-0217	UWMA-0217			d__Bacteria;p__Pseudomonadota;c__Gammaproteobacteria;o__UWMA-0217;f__UWMA-0217;g__;s__
SevenSisters_M42_B24	3	58.52	0.195	63.71	0.87	0.694	4078	2036216	0	0	0	0	0	0	0	0	0.0383324	Bacteria	Pseudomonadota	Alphaproteobacteria	JAAXGF01	JAAXGF01			d__Bacteria;p__Pseudomonadota;c__Alphaproteobacteria;o__JAAXGF01;f__JAAXGF01;g__;s__
SevenSisters_M42_B25	2	99.59	0.406	99.97	0	0.388	177127	1737884	0	0.0237389	0.132795	0	0	0	0.0289037	0	0.282685	Bacteria	Campylobacterota	Campylobacteria	Campylobacterales	Nitratiruptoraceae			d__Bacteria;p__Campylobacterota;c__Campylobacteria;o__Campylobacterales;f__Nitratiruptoraceae;g__;s__
SevenSisters_M42_B26	0	81.24	1.448	79	0	0.332	8405	2162641	0	0	0	0	0	0.00413078	0	0.0072583	0.0309377	Bacteria	Bacteroidota	Bacteroidia	Flavobacteriales	Flavobacteriaceae	CAJQLB01		d__Bacteria;p__Bacteroidota;c__Bacteroidia;o__Flavobacteriales;f__Flavobacteriaceae;g__CAJQLB01;s__
SevenSisters_M42_B27	5	85.21	0.567	90.96	0.29	0.719	9030	2426318	0	0	0	0	0	0	0	0	0.212667	Bacteria	Pseudomonadota	Gammaproteobacteria	JADZEE01	JADZEE01			d__Bacteria;p__Pseudomonadota;c__Gammaproteobacteria;o__JADZEE01;f__JADZEE01;g__;s__
SevenSisters_M42_B28	2	87.86	0.019	97.69	0.01	0.638	76869	1940930	0	0	0	0	0	0	0	0	0.0711773	Bacteria	Pseudomonadota	Gammaproteobacteria	Methylococcales	Methylothermaceae			d__Bacteria;p__Pseudomonadota;c__Gammaproteobacteria;o__Methylococcales;f__Methylothermaceae;g__;s__
SevenSisters_M42_B29	4	92.95	0.737	93.71	1.08	0.513	11150	2679137	0	0.00800892	0	0	0	0	0	0	0.0371582	Bacteria	Pseudomonadota	Gammaproteobacteria	GCA-001735895	GCA-001735895	JACNJF01		d__Bacteria;p__Pseudomonadota;c__Gammaproteobacteria;o__GCA-001735895;f__GCA-001735895;g__JACNJF01;s__
SevenSisters_M42_B3	2	98.01	2.722	100	0.55	0.531	27089	4436698	0.00479889	0.00128499	0	0	0	0	0	0	0.694803	Bacteria	Bacteroidota	Bacteroidia	Chitinophagales	Saprospiraceae	UBA6168		d__Bacteria;p__Bacteroidota;c__Bacteroidia;o__Chitinophagales;f__Saprospiraceae;g__UBA6168;s__
SevenSisters_M42_B30	1	84.94	0	90.19	0.08	0.368	9455	1114360	0	0	0	0	0	0	0	0	0.0336026	Bacteria	Pseudomonadota	Alphaproteobacteria	G023898725				d__Bacteria;p__Pseudomonadota;c__Alphaproteobacteria;o__G023898725;f__;g__;s__
SevenSisters_M42_B31	5	97.27	2	98.54	0.99	0.598	32504	4519840	0	0.00162062	0	0	0	0	0	0	0.118285	Bacteria	Chloroflexota	Anaerolineae	J102	J102	JAADII01		d__Bacteria;p__Chloroflexota;c__Anaerolineae;o__J102;f__J102;g__JAADII01;s__
SevenSisters_M42_B32	0	54.65	8.4	52.69	8.41	0.291	3661	1760862	0	0.00672369	0	0	0	0	0.00939059	0	0.0264526	Bacteria	Bacteroidota	Bacteroidia	Flavobacteriales	Flavobacteriaceae			d__Bacteria;p__Bacteroidota;c__Bacteroidia;o__Flavobacteriales;f__Flavobacteriaceae;g__;s__
SevenSisters_M42_B33	7	97.74	1.129	97.54	0.07	0.653	69650	4371073	0.00145728	0.00120246	0	0	0	0	0	0	0.148293	Bacteria	Bacteroidota	Rhodothermia	Rhodothermales	ISCAR-4553	Rhodocaloribacter		d__Bacteria;p__Bacteroidota;c__Rhodothermia;o__Rhodothermales;f__ISCAR-4553;g__Rhodocaloribacter;s__
SevenSisters_M42_B34	4	90.9	0.909	96.55	2.86	0.631	23349	4216931	0.00178198	0.00087135	0	0	0	0	0	0	0.814156	Bacteria	Chloroflexota	Anaerolineae	Caldilineales	Caldilineaceae	S144-5		d__Bacteria;p__Chloroflexota;c__Anaerolineae;o__Caldilineales;f__Caldilineaceae;g__S144-5;s__
SevenSisters_M42_B35	2	63.49	2.439	57.63	0.28	0.293	8069	915604	0	0.0177481	0	0	0	0	0	0	1.61972	Bacteria	Aquificota	Aquificae	Hydrogenothermales	Hydrogenothermaceae	Hydrogenothermus		d__Bacteria;p__Aquificota;c__Aquificae;o__Hydrogenothermales;f__Hydrogenothermaceae;g__Hydrogenothermus;s__
SevenSisters_M42_B36	2	97.8	1.098	96.66	2.19	0.572	33174	4478046	0	0	0	0	0	0	0	0	0.0432107	Bacteria	OLB16	OLB16	OLB16	OLB16			d__Bacteria;p__OLB16;c__OLB16;o__OLB16;f__OLB16;g__;s__
SevenSisters_M42_B37	0	75.9	0.181	84.99	2.25	0.581	7798	2376017	0	0.0625547	0	0	0	0	0.00218893	0	0.560984	Bacteria	Chloroflexota	Anaerolineae	JAADDB01	JAADDB01	JAADDB01		d__Bacteria;p__Chloroflexota;c__Anaerolineae;o__JAADDB01;f__JAADDB01;g__JAADDB01;s__
SevenSisters_M42_B38	2	80.04	2.732	87.83	0.72	0.469	5691	2024221	0	0	0	0	0	0	0	0	0.20741	Bacteria	Pseudomonadota	Gammaproteobacteria	Methylococcales	Methylomonadaceae	Methylomarinum		d__Bacteria;p__Pseudomonadota;c__Gammaproteobacteria;o__Methylococcales;f__Methylomonadaceae;g__Methylomarinum;s__
SevenSisters_M42_B39	0	82.44	0	90.73	0.35	0.374	12994	776120	0	0	0	0	0	0	0.00117093	0	0.287277	Bacteria	Patescibacteria	Microgenomatia	JAADGY01	JAADGY01	JAADGY01		d__Bacteria;p__Patescibacteria;c__Microgenomatia;o__JAADGY01;f__JAADGY01;g__JAADGY01;s__
SevenSisters_M42_B4	4	79.81	2.521	78.04	3.21	0.712	9111	6056911	0	0	0	0	0	0	0	0	0.0429776	Bacteria	Myxococcota	UBA796	UBA796	GCA-2862545			d__Bacteria;p__Myxococcota;c__UBA796;o__UBA796;f__GCA-2862545;g__;s__
SevenSisters_M42_B40	3	80.91	1.29	87.92	0.33	0.709	7383	3679565	0	0	0	0	0	0	0	0	0.158124	Bacteria	Myxococcota	UBA9042	JABWCM01				d__Bacteria;p__Myxococcota;c__UBA9042;o__JABWCM01;f__;g__;s__
SevenSisters_M42_B41	4	66	0.954	66.39	1.55	0.594	3923	1851344	0	0	0	0	0	0	0	0	0.0281611	Bacteria	Pseudomonadota	Alphaproteobacteria	Rhodobacterales	Rhodobacteraceae	CAJXWO01		d__Bacteria;p__Pseudomonadota;c__Alphaproteobacteria;o__Rhodobacterales;f__Rhodobacteraceae;g__CAJXWO01;s__
SevenSisters_M42_B42	2	62.06	1.724	72.12	1.88	0.676	16182	1716541	0	0.0211481	0	0	0	0	0	0	1.39421	Bacteria	Pseudomonadota	Gammaproteobacteria	J048	J048	J048		d__Bacteria;p__Pseudomonadota;c__Gammaproteobacteria;o__J048;f__J048;g__J048;s__
SevenSisters_M42_B43	4	95.4	2.162	94.44	0.77	0.434	13676	2011049	0	0	0	0	0	0	0	0	0.0376432	Bacteria	Pseudomonadota	Gammaproteobacteria	Nitrosococcales	Methylophagaceae			d__Bacteria;p__Pseudomonadota;c__Gammaproteobacteria;o__Nitrosococcales;f__Methylophagaceae;g__;s__
SevenSisters_M42_B44	3	96.13	0.406	99.84	0.44	0.336	26752	1649679	0	0	0	0	0	0	0	0	0.508133	Bacteria	Aquificota	Aquificae	Hydrogenothermales	Hydrogenothermaceae	JAADDZ01		d__Bacteria;p__Aquificota;c__Aquificae;o__Hydrogenothermales;f__Hydrogenothermaceae;g__JAADDZ01;s__
SevenSisters_M42_B45	1	82.27	4.545	86.14	1	0.623	7991	1996548	0	0.0618097	0.00396645	0	0	0	0.00119394	0	0.0340063	Bacteria	Chloroflexota	Anaerolineae	Anaerolineales	DRMV01	DRMV01		d__Bacteria;p__Chloroflexota;c__Anaerolineae;o__Anaerolineales;f__DRMV01;g__DRMV01;s__
SevenSisters_M42_B46	3	74.91	5.128	66.42	2.92	0.697	4210	2358902	0	0.00169515	0	0	0	0	0.00393818	0	0.0275767	Bacteria	Acidobacteriota	Thermoanaerobaculia	Thermoanaerobaculales				d__Bacteria;p__Acidobacteriota;c__Thermoanaerobaculia;o__Thermoanaerobaculales;f__;g__;s__
SevenSisters_M42_B47	0	82.15	1.702	83.36	2.35	0.354	5782	2207421	0	0	0	0	0	0	0	0	0.170192	Bacteria	Bacteroidota	Bacteroidia	Flavobacteriales	Vicingaceae	UBA852		d__Bacteria;p__Bacteroidota;c__Bacteroidia;o__Flavobacteriales;f__Vicingaceae;g__UBA852;s__
SevenSisters_M42_B48	0	99.56	1.304	100	0.2	0.643	69920	2138965	0	0.0107874	0	0	0	0	0	0	0.409947	Bacteria	Pseudomonadota	Alphaproteobacteria	Rhizobiales	Thermopetrobacteraceae	Thermopetrobacter		d__Bacteria;p__Pseudomonadota;c__Alphaproteobacteria;o__Rhizobiales;f__Thermopetrobacteraceae;g__Thermopetrobacter;s__
SevenSisters_M42_B49	5	97.63	1.149	95.59	0.43	0.6	33180	4722023	0	0.00275684	0	0	0	0	0	0	0.0477976	Bacteria	Planctomycetota	Planctomycetia	Pirellulales	Pirellulaceae	S141-3		d__Bacteria;p__Planctomycetota;c__Planctomycetia;o__Pirellulales;f__Pirellulaceae;g__S141-3;s__
SevenSisters_M42_B5	2	94.1	1.219	95.95	0.49	0.434	12046	1303585	0	0	0	0	0	0	0	0	0.246951	Bacteria	Aquificota	Aquificae	Aquificales	Aquificaceae	Aquifex		d__Bacteria;p__Aquificota;c__Aquificae;o__Aquificales;f__Aquificaceae;g__Aquifex;s__
SevenSisters_M42_B50	2	76.18	2.75	83.44	2.88	0.539	5503	1972262	0	0	0	0	0	0	0	0	0.714431	Bacteria	Bacteroidota	Rhodothermia					d__Bacteria;p__Bacteroidota;c__Rhodothermia;o__;f__;g__;s__
SevenSisters_M42_B51	7	91.37	0	95.81	0.13	0.545	33202	1781247	0	0	0	0	0	0	0	0	0.60036	Bacteria	WOR-3	Hydrothermia	LBFQ01	LBFQ01	JAADCS01		d__Bacteria;p__WOR-3;c__Hydrothermia;o__LBFQ01;f__LBFQ01;g__JAADCS01;s__
SevenSisters_M42_B52	5	55.51	0	74.08	1.62	0.727	4627	3685799	0	0	0	0	0	0	0	0	0.048505	Bacteria	Pseudomonadota	Gammaproteobacteria	HK1	HK1			d__Bacteria;p__Pseudomonadota;c__Gammaproteobacteria;o__HK1;f__HK1;g__;s__
SevenSisters_M42_B53	6	98.11	1.075	99.15	0.26	0.51	32106	3304540	0	0	0	0	0	0	0	0	0.0418596	Bacteria	Bacteroidota	Bacteroidia	UBA10329	UBA10329	UBA10329		d__Bacteria;p__Bacteroidota;c__Bacteroidia;o__UBA10329;f__UBA10329;g__UBA10329;s__
SevenSisters_M42_B54	1	97.72	1.136	94.51	0.1	0.664	80771	2881045	0	0	0	0	0	0	0	0	0.210916	Bacteria	Planctomycetota	Phycisphaerae	Phycisphaerales	UBA1924	S146-42		d__Bacteria;p__Planctomycetota;c__Phycisphaerae;o__Phycisphaerales;f__UBA1924;g__S146-42;s__
SevenSisters_M42_B55	5	95.53	0.816	98.23	0.02	0.675	39339	2610125	0	0	0	0	0	0	0	0	1.71849	Bacteria	Pseudomonadota	Gammaproteobacteria	JAJDOJ01	JAJDOJ01			d__Bacteria;p__Pseudomonadota;c__Gammaproteobacteria;o__JAJDOJ01;f__JAJDOJ01;g__;s__
SevenSisters_M42_B56	0	83.9	0.156	99.03	0.95	0.496	24513	980127	0	0	0	0	0	0	0	0	0.864663	Bacteria	Patescibacteria	Paceibacteria	UBA9983_A	JAGLOS01			d__Bacteria;p__Patescibacteria;c__Paceibacteria;o__UBA9983_A;f__JAGLOS01;g__;s__
SevenSisters_M42_B57	1	93.98	0	100	0.55	0.301	25707	2423529	0	0.0103912	0	0	0	0	0	0	0.121191	Bacteria	Bacteroidota	Bacteroidia	SpSt-205	S141-50			d__Bacteria;p__Bacteroidota;c__Bacteroidia;o__SpSt-205;f__S141-50;g__;s__
SevenSisters_M42_B58	2	95.45	3.409	93.8	2.29	0.701	50331	3924488	0	0	0	0	0	0	0	0	0.715014	Bacteria	Planctomycetota	UBA1135	UBA2386	GCA-002748355			d__Bacteria;p__Planctomycetota;c__UBA1135;o__UBA2386;f__GCA-002748355;g__;s__
SevenSisters_M42_B59	0	88.25	0	88.43	0.09	0.388	48612	1840984	0	0	0	0	0	0	0	0	0.0921696	Bacteria	Bacteroidota	Bacteroidia	SpSt-205	JAADEI01	JAADEI01		d__Bacteria;p__Bacteroidota;c__Bacteroidia;o__SpSt-205;f__JAADEI01;g__JAADEI01;s__
SevenSisters_M42_B6	3	92.55	0.635	88.17	0	0.594	11221	3085880	0	0	0	0	0	0	0	0	0.0395843	Bacteria	Bacteroidota	Rhodothermia	Rhodothermales	Rhodothermaceae	Rhodothermus		d__Bacteria;p__Bacteroidota;c__Rhodothermia;o__Rhodothermales;f__Rhodothermaceae;g__Rhodothermus;s__
SevenSisters_M42_B60	1	93.71	2.037	98.56	1.05	0.665	53081	4345642	0	0	0	0	0	0	0	0	0.121209	Bacteria	Pseudomonadota	Gammaproteobacteria	Pseudomonadales	HTCC2089			d__Bacteria;p__Pseudomonadota;c__Gammaproteobacteria;o__Pseudomonadales;f__HTCC2089;g__;s__
SevenSisters_M42_B61	0	91.81	2.727	96.43	0.85	0.652	27039	2369669	0	0.106285	0	0	0	0	0	0	1.23909	Bacteria	Chloroflexota	Anaerolineae	Anaerolineales	DRMV01	JAADEN01		d__Bacteria;p__Chloroflexota;c__Anaerolineae;o__Anaerolineales;f__DRMV01;g__JAADEN01;s__
SevenSisters_M42_B62	0	73.4	0	99.72	0.01	0.436	26496	607272	0	0	0	0	0	0	0	0	0.043272	Bacteria	Patescibacteria	Paceibacteria	UBA9983_A	UBA1539			d__Bacteria;p__Patescibacteria;c__Paceibacteria;o__UBA9983_A;f__UBA1539;g__;s__
SevenSisters_M42_B63	4	97.73	2.197	99.96	0.31	0.457	17380	4626815	0	0.00271618	0	0	0	0	0.00235504	0	0.0545512	Bacteria	Calditrichota	Calditrichia	Calditrichales	Calditrichaceae	Caldithrix		d__Bacteria;p__Calditrichota;c__Calditrichia;o__Calditrichales;f__Calditrichaceae;g__Caldithrix;s__
SevenSisters_M42_B64	0	60.36	2.528	76.77	3.41	0.4	7757	592349	0.0125946	0	0	0	0	0	0	0	0.0321147	Bacteria	Patescibacteria	Paceibacteria	UBA9983_A	UBA918	OLB19		d__Bacteria;p__Patescibacteria;c__Paceibacteria;o__UBA9983_A;f__UBA918;g__OLB19;s__
SevenSisters_M42_B65	4	97.47	1.634	99.41	0.28	0.435	31610	2680572	0	0	0	0	0	0	0	0.00527973	0.0603132	Bacteria	Pseudomonadota	Gammaproteobacteria	SZUA-229	SZUA-229	S010-25		d__Bacteria;p__Pseudomonadota;c__Gammaproteobacteria;o__SZUA-229;f__SZUA-229;g__S010-25;s__
SevenSisters_M42_B66	0	87.85	0.934	91.25	0.45	0.327	53460	957909	0	0	0	0	0	0	0	0	0.0629635	Archaea	Micrarchaeota	Micrarchaeia	Anstonellales	J096	WAKO01		d__Archaea;p__Micrarchaeota;c__Micrarchaeia;o__Anstonellales;f__J096;g__WAKO01;s__
SevenSisters_M42_B67	3	93.03	1.149	91.75	1.05	0.583	19576	4775147	0	0.00208056	0	0	0	0	0	0	0.0440609	Bacteria	Planctomycetota	Planctomycetia	Pirellulales	Pirellulaceae	Mariniblastus		d__Bacteria;p__Planctomycetota;c__Planctomycetia;o__Pirellulales;f__Pirellulaceae;g__Mariniblastus;s__
SevenSisters_M42_B68	5	70.78	1.176	66.69	4.42	0.617	4586	3612258	0	0	0	0	0	0	0	0	0.0285085	Bacteria	Planctomycetota	Planctomycetia	Pirellulales	Pirellulaceae	S141-3		d__Bacteria;p__Planctomycetota;c__Planctomycetia;o__Pirellulales;f__Pirellulaceae;g__S141-3;s__
SevenSisters_M42_B69	1	97.04	0	99.38	0.04	0.36	28118	2157977	0	0.00505382	0	0	0	0	0	0	0.234648	Bacteria	Bacteroidota	Bacteroidia	Flavobacteriales	NORP312			d__Bacteria;p__Bacteroidota;c__Bacteroidia;o__Flavobacteriales;f__NORP312;g__;s__
SevenSisters_M42_B7	7	84.46	1.29	92.78	0.74	0.701	6843	3773327	0	0	0	0	0	0	0	0	0.0394425	Bacteria	Myxococcota	Polyangia	Nannocystales	Nannocystaceae	J032	J032 sp003696955	d__Bacteria;p__Myxococcota;c__Polyangia;o__Nannocystales;f__Nannocystaceae;g__J032;s__J032 sp003696955
SevenSisters_M42_B70	0	98.71	1.346	100	0.02	0.337	31688	1942134	0	0.0110655	0.116695	0	0	0	0.00528647	0	0.0426691	Bacteria	Campylobacterota	Campylobacteria	Campylobacterales	JAADDL01			d__Bacteria;p__Campylobacterota;c__Campylobacteria;o__Campylobacterales;f__JAADDL01;g__;s__
SevenSisters_M42_B71	1	93.27	0	96.26	0.27	0.679	42891	2748872	0	0.00313342	0	0	0	0	0	0	0.138491	Bacteria	J088	J088	J088				d__Bacteria;p__J088;c__J088;o__J088;f__;g__;s__
SevenSisters_M42_B72	3	89.57	1.075	82.93	0.42	0.634	6405	2994614	0	0	0	0	0	0	0	0	0.0312337	Bacteria	Poribacteria	WGA-4E	GCA-2687025	GCA-2687025			d__Bacteria;p__Poribacteria;c__WGA-4E;o__GCA-2687025;f__GCA-2687025;g__;s__
SevenSisters_M42_B73	7	87.9	2.258	86.68	0.62	0.684	16778	5315880	0	0.0521961	0	0.00134378	0	0	0.00165771	0	0.0482024	Bacteria	Myxococcota	Polyangia	Polyangiales	SG8-38	JAHDCI01		d__Bacteria;p__Myxococcota;c__Polyangia;o__Polyangiales;f__SG8-38;g__JAHDCI01;s__
SevenSisters_M42_B74	1	93.18	0.671	91.14	1.59	0.603	30427	3102951	0.00475229	0	0	0	0	0	0	0	0.0540631	Bacteria	Planctomycetota	Phycisphaerae	Phycisphaerales	UBA1924			d__Bacteria;p__Planctomycetota;c__Phycisphaerae;o__Phycisphaerales;f__UBA1924;g__;s__
SevenSisters_M42_B75	1	90.5	2.15	85.58	0.4	0.721	17813	2360770	0.00204384	0.0172108	0	0	0	0	0	0	0.281089	Bacteria	Planctomycetota	UBA1135	UBA1135	UBA1135			d__Bacteria;p__Planctomycetota;c__UBA1135;o__UBA1135;f__UBA1135;g__;s__
SevenSisters_M42_B76	3	100	2.265	98.7	0.93	0.337	28478	1368466	0	0	0	0	0	0	0	0	0.0911912	Archaea	Thermoproteota	Nitrososphaeria	Nitrososphaerales	Nitrosocaldaceae	Nitrosothermus		d__Archaea;p__Thermoproteota;c__Nitrososphaeria;o__Nitrososphaerales;f__Nitrosocaldaceae;g__Nitrosothermus;s__
SevenSisters_M42_B77	5	94.01	1.479	92.25	0.36	0.676	19743	2626410	0	0	0	0	0	0	0	0	0.22246	Bacteria	Pseudomonadota	Gammaproteobacteria	J113	J113	J113		d__Bacteria;p__Pseudomonadota;c__Gammaproteobacteria;o__J113;f__J113;g__J113;s__
SevenSisters_M42_B78	0	89.21	0.08	75.62	0.06	0.697	13716	2542270	0	0	0	0	0	0	0	0	0.291245	Bacteria	Pseudomonadota	Alphaproteobacteria	Rhodobacterales	Rhodobacteraceae	Meinhardsimonia		d__Bacteria;p__Pseudomonadota;c__Alphaproteobacteria;o__Rhodobacterales;f__Rhodobacteraceae;g__Meinhardsimonia;s__
SevenSisters_M42_B79	2	85.71	2.689	87.24	0.12	0.646	7865	2781567	0	0.00224447	0	0	0	0	0	0	0.0967076	Bacteria	J088	J088	J088	J088	J088		d__Bacteria;p__J088;c__J088;o__J088;f__J088;g__J088;s__
SevenSisters_M42_B8	2	90.85	2.863	88.51	0.15	0.519	8519	1561682	0	0.0214849	0	0	0	0	0	0	0.108105	Bacteria	Aquificota	Aquificae	Aquificales	Aquificaceae	Hydrogenivirga		d__Bacteria;p__Aquificota;c__Aquificae;o__Aquificales;f__Aquificaceae;g__Hydrogenivirga;s__
SevenSisters_M42_B80	2	98.27	8.602	98.82	3.17	0.339	34288	2967546	0	0	0	0	0	0	0	0	0.0890644	Bacteria	Bacteroidota	Bacteroidia	Bacteroidales	S143-33	S143-33		d__Bacteria;p__Bacteroidota;c__Bacteroidia;o__Bacteroidales;f__S143-33;g__S143-33;s__
SevenSisters_M42_B81	1	97.35	1.492	100	0.31	0.679	61567	3211641	0	0	0	0	0	0	0	0	0.451429	Bacteria	Pseudomonadota	Alphaproteobacteria	Geminicoccales	Geminicoccaceae			d__Bacteria;p__Pseudomonadota;c__Alphaproteobacteria;o__Geminicoccales;f__Geminicoccaceae;g__;s__
SevenSisters_M42_B82	2	96.63	1.648	94.79	1.17	0.552	35429	5046066	0.00298899	0.00776636	0	0	0	0	0	0	0.0562962	Bacteria	KSB1	UBA2214	DRLW01	DRLW01	WFVT01		d__Bacteria;p__KSB1;c__UBA2214;o__DRLW01;f__DRLW01;g__WFVT01;s__
SevenSisters_M42_B83	6	93.34	1.098	95.89	0.07	0.446	13429	3042071	0	0.00801997	0	0	0	0	0	0	1.25367	Bacteria	Calditrichota	Calditrichia	RBG-13-44-9	J042	WGBF01		d__Bacteria;p__Calditrichota;c__Calditrichia;o__RBG-13-44-9;f__J042;g__WGBF01;s__
SevenSisters_M42_B85	2	93.63	3.818	96.56	1.47	0.606	44114	3180042	0	0	0	0	0	0	0	0	0.109174	Bacteria	Chloroflexota	Anaerolineae	Anaerolineales	DRKV01	DRKV01		d__Bacteria;p__Chloroflexota;c__Anaerolineae;o__Anaerolineales;f__DRKV01;g__DRKV01;s__
SevenSisters_M42_B86	1	97.78	1.477	96.87	1.04	0.459	219256	3340308	0	0	0	0	0	0	0	0	0.066903	Bacteria	Bacteroidota	Bacteroidia	Chitinophagales	REEL01			d__Bacteria;p__Bacteroidota;c__Bacteroidia;o__Chitinophagales;f__REEL01;g__;s__
SevenSisters_M42_B87	2	59.62	0.406	65.13	1.16	0.299	23898	999474	0	0.00341261	0	0	0	0	0	0	0.629385	Bacteria	Aquificota	Aquificae	Hydrogenothermales	Hydrogenothermaceae	Hydrogenothermus		d__Bacteria;p__Aquificota;c__Aquificae;o__Hydrogenothermales;f__Hydrogenothermaceae;g__Hydrogenothermus;s__
SevenSisters_M42_B88	1	54.5	1.074	46.24	0.08	0.301	5665	719322	0	0.00323364	0.00411473	0	0	0	0	0	1.56711	Bacteria	Aquificota	Aquificae	Hydrogenothermales	Hydrogenothermaceae	QNZC01		d__Bacteria;p__Aquificota;c__Aquificae;o__Hydrogenothermales;f__Hydrogenothermaceae;g__QNZC01;s__
SevenSisters_M42_B89	2	57.46	0.645	69.59	1.49	0.691	4207	2854537	0	0.0014233	0	0	0	0	0	0	0.0369095	Bacteria	Myxococcota	UBA9042	JABWCM01				d__Bacteria;p__Myxococcota;c__UBA9042;o__JABWCM01;f__;g__;s__
SevenSisters_M42_B9	3	95.45	0.413	94.42	1.86	0.622	18306	4611033	0	0	0	0	0	0	0	0	0.312202	Bacteria	Planctomycetota	Planctomycetia					d__Bacteria;p__Planctomycetota;c__Planctomycetia;o__;f__;g__;s__
SevenSisters_M42_B90	1	86.47	2.763	84.76	1.68	0.69	5416	2849869	0	0	0	0	0	0	0	0	0.140172	Bacteria	Planctomycetota	Phycisphaerae	UBA1845				d__Bacteria;p__Planctomycetota;c__Phycisphaerae;o__UBA1845;f__;g__;s__
SevenSisters_M42_B91	0	98.3	0	97.55	0.01	0.63	17509	1949437	0	0	0	0	0	0	0	0	0.64176	Bacteria	WOR-3	Hydrothermia	S141-80	S141-80	S141-80		d__Bacteria;p__WOR-3;c__Hydrothermia;o__S141-80;f__S141-80;g__S141-80;s__
SevenSisters_M42_B92	2	96.7	1.098	96.61	1.14	0.541	11202	4817545	0	0	0	0	0	0	0	0	0.0851332	Bacteria	Calditrichota	Calditrichia	RBG-13-44-9	J042			d__Bacteria;p__Calditrichota;c__Calditrichia;o__RBG-13-44-9;f__J042;g__;s__
SevenSisters_M42_B93	0	66.05	0	99.47	0.03	0.502	112670	707841	0	0	0	0	0	0	0	0	0.26888	Bacteria	Patescibacteria	Paceibacteria	Moranbacterales	GCA-2747515			d__Bacteria;p__Patescibacteria;c__Paceibacteria;o__Moranbacterales;f__GCA-2747515;g__;s__
SevenSisters_M42_B94	0	80.37	0	91.91	0.39	0.327	85587	713067	0	0	0	0	0	0	0	0	0.282825	Archaea	Micrarchaeota	Micrarchaeia	Anstonellales	J096	JAADEL01		d__Archaea;p__Micrarchaeota;c__Micrarchaeia;o__Anstonellales;f__J096;g__JAADEL01;s__
SevenSisters_M42_B95	0	95.45	0.378	91.99	1.61	0.623	21864	2691164	0.00777795	0	0	0	0	0	0	0	0.0413875	Bacteria	Planctomycetota	Phycisphaerae	Phycisphaerales	UBA1924	GCA-2732755		d__Bacteria;p__Planctomycetota;c__Phycisphaerae;o__Phycisphaerales;f__UBA1924;g__GCA-2732755;s__
SevenSisters_M42_B96	0	76.73	1.485	100	0.09	0.376	32358	967708	0	0	0	0	0	0	0	0	0.212624	Bacteria	Patescibacteria	ABY1	S139-126	S139-126	S139-126		d__Bacteria;p__Patescibacteria;c__ABY1;o__S139-126;f__S139-126;g__S139-126;s__
SevenSisters_M42_B97	4	93.18	2.272	95.77	0.31	0.718	24367	3805038	0	0	0	0	0	0	0	0	0.356972	Bacteria	Planctomycetota	B15-G4	B15-G4	JADJEK01			d__Bacteria;p__Planctomycetota;c__B15-G4;o__B15-G4;f__JADJEK01;g__;s__
SevenSisters_M42_B98	0	79.36	0	80.03	0.01	0.409	15468	676286	0	0	0	0	0	0	0	0	0.0377664	Archaea	Micrarchaeota	Micrarchaeia	Anstonellales	Bilamarchaeaceae			d__Archaea;p__Micrarchaeota;c__Micrarchaeia;o__Anstonellales;f__Bilamarchaeaceae;g__;s__
SevenSisters_M42_B99	1	77.05	0	85.57	0.17	0.74	5388	3173735	0	0	0	0	0	0	0	0	0.145425	Bacteria	Myxococcota_A	UBA9160	UBA9160	JAFDET01			d__Bacteria;p__Myxococcota_A;c__UBA9160;o__UBA9160;f__JAFDET01;g__;s__
Averages	2.60088
Total	2965
