# Supplementary material for: Remarkable biosynthetic capacity of Arctic hydrothermal biofilms
Source: Research Square preprint supplement (doi:10.21203/rs.3.rs-7619139/v1), 2025-09-29
Supplement: Supplementary file 5 [file c1547e089c27f41074077264.xlsx]

## Sheet: Ark1
Supplementary Table 2. Nanopore long-read sequencing of RNA exctracted from hydrothermal bioilms. Metatranscriptome IDs corresponds to samples in main Table 1.
Metatranscriptome ID	RNA depletion	Total reads	rRNA *	putative mRNA reads	Recovered mRNA (%)	N50 putative mRNA
c24	YES	5560995	5063462	497533	8.94683	842
c25	NO	542000	440716	101284	18.6871	1348
c33	YES	3253671	1458582	1795089	55.1712	1273
c36	YES	8587294	8386720	200574	2.33571	1297
c37	YES	1389885	352459	1037426	74.6411	1231
c38	YES	2636052	268522	2367530	89.8135	1835
c39	YES	4301410	2284663	2016747	46.8857	1555
*sortmerna v.4.3.6
